# Supplementary material for: The factors controlling along-arc and across-arc variations of primitive arc magma compositions: A global perspective
Source: Frontiers journal article supplement (doi:10.3389/feart.2022.1055255), 2022-12-23
Supplement: Data_Sheet_1.xlsx [file Data_Sheet_1.xlsx]

## Sheet: A1 Raw data
Source.Name	CITATIONS	TECTONIC SETTING	Volcano	volcano site for paper	Volcano No.	Section No.		LOCATION	LOCATION COMMENT	LATITUDE MIN	LATITUDE MAX	LONGITUDE MIN	LONGITUDE MAX	LAND OR SEA	ELEVATION MIN	ELEVATION MAX	SAMPLE NAME	ROCK NAME	Age	MIN. AGE (YRS.)	MAX. AGE (YRS.)	GEOL.	AGE	ERUPTION DAY	ERUPTION MONTH	ERUPTION YEAR	ROCK TEXTURE	ROCK TYPE	DRILL DEPTH MIN	DRILL DEPTHAX	ALTERATION	MINERAL	MATERIAL	SIO2(WT%)	TIO2(WT%)	B2O3(WT%)	AL2O3(WT%)	CR2O3(WT%)	FE2O3(WT%)	FEO(WT%)	FEOT(WT%)	CAO(WT%)	MGO(WT%)	MNO(WT%)	NIO(WT%)	K2O(WT%)	NA2O(WT%)	P2O5(WT%)	H2O(WT%)
ALEUTIAN_ARC 18.9-4.4.csv	[19452][21215]	1 Aleutian	Ingenstrem Depression	Ingenstrem Depression	1	1	W Aleutian	ALEUTIAN ARC / WESTERN ALEUTIAN ARC / INGENSTREM DEPRESSION	INGENSTREM DEPRESSION	52.4716	52.4716	175.33	175.33	SAQ	-791	-791	s_TN182_13_001 [19452]	ANDESITE, BASALTIC [19452]	dredge 520·8 ± 44·2									VOL					WR [19452]	53.19	0.75		18.16				7.17	8.77	7.4	0.15		0.81	3.43	0.18
ALEUTIAN_ARC 18.9-4.4.csv	[19452][21215]	1 Aleutian	Ingenstrem Depression	Ingenstrem Depression	1	1	W Aleutian	ALEUTIAN ARC / WESTERN ALEUTIAN ARC / INGENSTREM DEPRESSION	INGENSTREM DEPRESSION	52.4343	52.4343	175.145	175.145	SAQ	-461	-461	s_TN182_09_001 [19452]	BASALT [19452]	dredge 520·8 ± 44·3									VOL					WR [19452]	50.41	0.86		18.17				7.97	9.36	8.85	0.18		0.77	3.25	0.17
ALEUTIAN_ARC 18.9-4.4.csv	[19452][21215]	1 Aleutian	Ingenstrem Depression	Ingenstrem Depression	1	1	W Aleutian	ALEUTIAN ARC / WESTERN ALEUTIAN ARC / INGENSTREM DEPRESSION	INGENSTREM DEPRESSION	52.532	52.532	175.215	175.215	SAQ	-1321	-1321	s_SO201-1B-14-006 [19452]	BASALT [19452] / ANDESITE, BASALTIC [21215]	dredge									VOL					WR [19452]	52.26	0.72		16.47				7.38	9.49	9.22	0.15		0.97	3.06	0.26
ALEUTIAN_ARC 18.9-4.4.csv	[19452][21215]	1 Aleutian	Ingenstrem Depression	Ingenstrem Depression	1	1	W Aleutian	ALEUTIAN ARC / WESTERN ALEUTIAN ARC / INGENSTREM DEPRESSION	INGENSTREM DEPRESSION	52.532	52.532	175.215	175.215	SAQ	-1321	-1321	s_SO201-1B-14-007 [19452]	BASALT [19452]	dredge 580·7 ± 50·7									VOL					WR [19452]	50.72	0.77		15.99				7.9	9.57	10.76	0.16		0.89	2.98	0.25
ALEUTIAN_ARC 18.9-4.4.csv	[19452][21215]	1 Aleutian	Ingenstrem Depression	Ingenstrem Depression	1	1	W Aleutian	ALEUTIAN ARC / WESTERN ALEUTIAN ARC / INGENSTREM DEPRESSION	INGENSTREM DEPRESSION	52.532	52.532	175.215	175.215	SAQ	-1321	-1321	s_SO201-1B-14-008 [19452]	BASALT [19452]	dredge 580·7 ± 50·7									VOL					WR [19452]	51.19	0.86		16.53				8.18	10.52	8.16	0.16		0.96	3.18	0.27
ALEUTIAN_ARC 18.9-4.4.csv	[19452][21215]	1 Aleutian	Ingenstrem Depression	Ingenstrem Depression	1	1	W Aleutian	ALEUTIAN ARC / WESTERN ALEUTIAN ARC / INGENSTREM DEPRESSION	INGENSTREM DEPRESSION	52.513	52.513	175.194	175.194	SAQ	-878	-878	s_SO201-1B-15-001 [19452]	BASALT [19452] / ANDESITE, BASALTIC [21215]	dredge 580·7 ± 50·8									VOL					WR [19452]	51.78	0.77		16.4				7.57	10.21	8.92	0.15		0.89	3.04	0.26
ALEUTIAN_ARC 18.9-4.4.csv	[19452][21215]	1 Aleutian	Ingenstrem Depression	Ingenstrem Depression	1	1	W Aleutian	ALEUTIAN ARC / WESTERN ALEUTIAN ARC / INGENSTREM DEPRESSION	INGENSTREM DEPRESSION	52.5301	52.5301	175.245	175.245	SAQ	-1567	-1567	s_TN182_07_002 [19452]	BASALT [19452] / ANDESITE, BASALTIC [21215]	dredge 580·7 ± 50·7									VOL					WR [19452]	52.01	0.73		17.16				7.49	9.12	9.1	0.16		0.92	3.14	0.16
ALEUTIAN_ARC 18.9-4.4.csv	[19452][21215]	1 Aleutian	Ingenstrem Depression	Ingenstrem Depression	1	1	W Aleutian	ALEUTIAN ARC / WESTERN ALEUTIAN ARC / INGENSTREM DEPRESSION	INGENSTREM DEPRESSION	52.4842	52.4842	175.277	175.277	SAQ	-770	-770	s_TN182_08_003 [19452]	BASALT [19452]	dredge 580·7 ± 50·7									VOL					WR [19452]	51.78	0.72		17.77				7.21	8.74	9.72	0.15		0.61	3.15	0.16
ALEUTIAN_ARC 18.9-4.4.csv	[19452][21215]	1 Aleutian	Ingenstrem Depression	Ingenstrem Depression	1	1	W Aleutian	ALEUTIAN ARC / WESTERN ALEUTIAN ARC / INGENSTREM DEPRESSION	INGENSTREM DEPRESSION	52.4842	52.4842	175.277	175.277	SAQ	-770	-770	s_TN182_08_006 [19452]	BASALT [19452] / ANDESITE, BASALTIC [21215]	dredge 580·7 ± 50·7									VOL					WR [19452]	52.09	0.73		18.09				7.25	8.88	8.79	0.16		0.61	3.23	0.16
ALEUTIAN_ARC 18.9-4.4.csv	[19452][21215]	1 Aleutian	Ingenstrem Depression	Ingenstrem Depression	1	1	W Aleutian	ALEUTIAN ARC / WESTERN ALEUTIAN ARC / INGENSTREM DEPRESSION	INGENSTREM DEPRESSION	52.4842	52.4842	175.277	175.277	SAQ	-770	-770	s_TN182_08_013 [19452]	BASALT [19452]	dredge 580·7 ± 50·7									VOL					WR [19452]	51.93	0.72		17.89				7.14	8.81	9.3	0.16		0.68	3.22	0.16
ALEUTIAN_ARC 18.9-4.4.csv	[19452][21215]	1 Aleutian	Ingenstrem Depression	Ingenstrem Depression	1	1	W Aleutian	ALEUTIAN ARC / WESTERN ALEUTIAN ARC / INGENSTREM DEPRESSION	INGENSTREM DEPRESSION	52.4842	52.4842	175.277	175.277	SAQ	-770	-770	s_TN182_08_014 [19452]	BASALT [19452] / ANDESITE, BASALTIC [21215]	133·6 ± 35·2									VOL					WR [19452]	52.08	0.72		18.15				7.14	8.92	8.78	0.16		0.64	3.25	0.17
ALEUTIAN_ARC 18.9-4.4.csv	[19452][21215]	1 Aleutian	Ingenstrem Depression	Ingenstrem Depression	1	1	W Aleutian	ALEUTIAN ARC / WESTERN ALEUTIAN ARC / INGENSTREM DEPRESSION	INGENSTREM DEPRESSION	52.514	52.514	175.21	175.21	SAQ	-1015	-1015	s_SO201-1B-16-007 [19452]	BASALT [19452] / ANDESITE, BASALTIC [21215]	dredge 580·7 ± 50·7									VOL					WR [19452]	51.88	0.78		16.38				7.65	10.14	8.72	0.16		0.96	3.07	0.26
ALEUTIAN_ARC 18.9-4.4.csv	[19452]	1 Aleutian	Ingenstrem Depression	Ingenstrem Depression	1	1	W Aleutian	ALEUTIAN ARC / WESTERN ALEUTIAN ARC / INGENSTREM DEPRESSION	INGENSTREM DEPRESSION	52.4343	52.4343	175.145	175.145	SAQ	-461	-461	s_TN182_09_003 [19452]	BASALT [19452]	late Pleistocene and Holocene,others<520ka									VOL					WR [19452]	50.3	0.87		18.1				8.25	9.33	8.8	0.19		0.77	3.21	0.18
ALEUTIAN_ARC 18.9-4.4.csv	[19452]	1 Aleutian	Ingenstrem Depression	Ingenstrem Depression	1	1	W Aleutian	ALEUTIAN ARC / WESTERN ALEUTIAN ARC / INGENSTREM DEPRESSION	INGENSTREM DEPRESSION	52.4343	52.4343	175.145	175.145	SAQ	-461	-461	s_TN182_09_002 [19452]	BASALT [19452]	late Pleistocene and Holocene,others<520ka									VOL					WR [19452]	50.33	0.86		18.21				8.27	9.33	8.66	0.17		0.77	3.22	0.18
ALEUTIAN_ARC 18.9-4.4.csv	[19452]	1 Aleutian	Ingenstrem Depression	Ingenstrem Depression	1	1	W Aleutian	ALEUTIAN ARC / WESTERN ALEUTIAN ARC / INGENSTREM DEPRESSION	INGENSTREM DEPRESSION	52.4343	52.4343	175.145	175.145	SAQ	-461	-461	s_TN182_09_004 [19452]	BASALT [19452]	late Pleistocene and Holocene,others<520ka									VOL					WR [19452]	50.35	0.86		18.28				8.02	9.4	8.69	0.18		0.77	3.27	0.18
ALEUTIAN_ARC 18.9-4.4.csv	[19452]	1 Aleutian	Ingenstrem Depression	Ingenstrem Depression	1	1	W Aleutian	ALEUTIAN ARC / WESTERN ALEUTIAN ARC / INGENSTREM DEPRESSION	INGENSTREM DEPRESSION	52.4343	52.4343	175.145	175.145	SAQ	-461	-461	s_TN182_09_005 [19452]	BASALT [19452]	late Pleistocene and Holocene,others<520ka									VOL					WR [19452]	50.36	0.86		18.07				8.14	9.25	9	0.18		0.74	3.23	0.17
ALEUTIAN_ARC 18.9-4.4.csv	[19452]	1 Aleutian	Ingenstrem Depression	Ingenstrem Depression	1	1	W Aleutian	ALEUTIAN ARC / WESTERN ALEUTIAN ARC / INGENSTREM DEPRESSION	INGENSTREM DEPRESSION	52.469	52.469	175.344	175.344	SAQ	-570	-570	s_SO201-1B-21-004 [19452]	BASALT [19452]	late Pleistocene and Holocene,others<520ka									VOL					WR [19452]	50.64	0.83		17.7				7.94	9.39	9.28	0.16		0.68	3.22	0.17
ALEUTIAN_ARC 18.9-4.4.csv	[19452]	1 Aleutian	Ingenstrem Depression	Ingenstrem Depression	1	1	W Aleutian	ALEUTIAN ARC / WESTERN ALEUTIAN ARC / INGENSTREM DEPRESSION	INGENSTREM DEPRESSION	52.469	52.469	175.344	175.344	SAQ	-570	-570	s_SO201-1B-21-005 [19452]	BASALT [19452]	late Pleistocene and Holocene,others<520ka									VOL					WR [19452]	50.65	0.83		17.66				7.94	9.39	9.3	0.16		0.68	3.22	0.17
ALEUTIAN_ARC 18.9-4.4.csv	[19452]	1 Aleutian	Ingenstrem Depression	Ingenstrem Depression	1	1	W Aleutian	ALEUTIAN ARC / WESTERN ALEUTIAN ARC / INGENSTREM DEPRESSION	INGENSTREM DEPRESSION	52.502	52.502	175.222	175.222	SAQ	-967	-967	s_SO201-1B-18-002 [19452]	BASALT [19452]	late Pleistocene and Holocene,others<520ka									VOL					WR [19452]	51.12	0.83		17.73				7.92	9.48	8.65	0.16		0.73	3.23	0.15
ALEUTIAN_ARC 18.9-4.4.csv	[19452]	1 Aleutian	Ingenstrem Depression	Ingenstrem Depression	1	1	W Aleutian	ALEUTIAN ARC / WESTERN ALEUTIAN ARC / INGENSTREM DEPRESSION	INGENSTREM DEPRESSION	52.5357	52.5357	175.085	175.085	SAQ	-1084	-1084	s_TN182_06_001 [19452]	BASALT [19452]	late Pleistocene and Holocene,others<520ka									VOL					WR [19452]	51.31	0.93		17.72				7.62	9.12	8.58	0.16		0.81	3.55	0.2
ALEUTIAN_ARC 18.9-4.4.csv	[19452]	1 Aleutian	Ingenstrem Depression	Ingenstrem Depression	1	1	W Aleutian	ALEUTIAN ARC / WESTERN ALEUTIAN ARC / INGENSTREM DEPRESSION	INGENSTREM DEPRESSION	52.4588	52.4588	175.294	175.294	SAQ	-790	-790	s_TN182_12_002 [19452]	BASALT [19452]	late Pleistocene and Holocene,others<520ka									VOL					WR [19452]	51.33	0.83		18.09				7.96	9.06	8.39	0.16		0.74	3.27	0.16
ALEUTIAN_ARC 18.9-4.4.csv	[19452]	1 Aleutian	Ingenstrem Depression	Ingenstrem Depression	1	1	W Aleutian	ALEUTIAN ARC / WESTERN ALEUTIAN ARC / INGENSTREM DEPRESSION	INGENSTREM DEPRESSION	52.4588	52.4588	175.294	175.294	SAQ	-790	-790	s_TN182_12_001 [19452]	BASALT [19452]	late Pleistocene and Holocene,others<520ka									VOL					WR [19452]	51.45	0.84		18.2				7.68	9.14	8.25	0.17		0.74	3.37	0.16
ALEUTIAN_ARC 18.9-4.4.csv	[19452]	1 Aleutian	Ingenstrem Depression	Ingenstrem Depression	1	1	W Aleutian	ALEUTIAN ARC / WESTERN ALEUTIAN ARC / INGENSTREM DEPRESSION	INGENSTREM DEPRESSION	52.532	52.532	175.215	175.215	SAQ	-1321	-1321	s_SO201-1B-14-001 [19452]	BASALT [19452]	late Pleistocene and Holocene,others<520ka									VOL					WR [19452]	51.59	0.88		16.88				7.87	10.63	7.58	0.16		0.99	3.15	0.26
ALEUTIAN_ARC 18.9-4.4.csv	[19452]	1 Aleutian	Ingenstrem Depression	Ingenstrem Depression	1	1	W Aleutian	ALEUTIAN ARC / WESTERN ALEUTIAN ARC / INGENSTREM DEPRESSION	INGENSTREM DEPRESSION	52.513	52.513	175.194	175.194	SAQ	-878	-878	s_SO201-1B-15-003 [19452]	BASALT [19452]	late Pleistocene and Holocene,others<520ka									VOL					WR [19452]	51.72	0.74		15.92				7.66	9.6	10.11	0.15		0.86	2.99	0.25
ALEUTIAN_ARC 18.9-4.4.csv	[19452]	1 Aleutian	Ingenstrem Depression	Ingenstrem Depression	1	1	W Aleutian	ALEUTIAN ARC / WESTERN ALEUTIAN ARC / INGENSTREM DEPRESSION	INGENSTREM DEPRESSION	52.5301	52.5301	175.245	175.245	SAQ	-1567	-1567	s_TN182_07_003 [19452]	BASALT [19452]	late Pleistocene and Holocene,others<520ka									VOL					WR [19452]	51.75	0.79		18.33				7.56	9.08	7.93	0.16		0.83	3.4	0.17
ALEUTIAN_ARC 18.9-4.4.csv	[19452]	1 Aleutian	Ingenstrem Depression	Ingenstrem Depression	1	1	W Aleutian	ALEUTIAN ARC / WESTERN ALEUTIAN ARC / INGENSTREM DEPRESSION	INGENSTREM DEPRESSION	52.5301	52.5301	175.245	175.245	SAQ	-1567	-1567	s_TN182_07_001 [19452]	BASALT [19452]	late Pleistocene and Holocene,others<520ka									VOL					WR [19452]	51.76	0.79		18.17				7.65	9.03	8.06	0.16		0.79	3.41	0.17
ALEUTIAN_ARC 18.9-4.4.csv	[19452]	1 Aleutian	Ingenstrem Depression	Ingenstrem Depression	1	1	W Aleutian	ALEUTIAN ARC / WESTERN ALEUTIAN ARC / INGENSTREM DEPRESSION	INGENSTREM DEPRESSION	52.5301	52.5301	175.245	175.245	SAQ	-1567	-1567	s_TN182_07_011 [19452]	BASALT [19452]	late Pleistocene and Holocene,others<520ka									VOL					WR [19452]	51.79	0.78		18.27				7.58	9.02	8.07	0.16		0.81	3.35	0.17
ALEUTIAN_ARC 18.9-4.4.csv	[19452]	1 Aleutian	Ingenstrem Depression	Ingenstrem Depression	1	1	W Aleutian	ALEUTIAN ARC / WESTERN ALEUTIAN ARC / INGENSTREM DEPRESSION	INGENSTREM DEPRESSION	52.513	52.513	175.194	175.194	SAQ	-878	-878	s_SO201-1B-15-005 [19452]	BASALT [19452]	late Pleistocene and Holocene,others<520ka									VOL					WR [19452]	51.79	0.78		16.37				7.62	10.15	8.89	0.15		0.94	3.04	0.26
ALEUTIAN_ARC 18.9-4.4.csv	[19452]	1 Aleutian	Ingenstrem Depression	Ingenstrem Depression	1	1	W Aleutian	ALEUTIAN ARC / WESTERN ALEUTIAN ARC / INGENSTREM DEPRESSION	INGENSTREM DEPRESSION	52.478	52.478	175.297	175.297	SAQ	-795	-795	s_SO201-1B-20-012 [19452]	BASALT [19452]	late Pleistocene and Holocene,others<520ka									VOL					WR [19452]	51.8	0.81		17.23				7.58	8.86	9.35	0.15		0.77	3.27	0.17
ALEUTIAN_ARC 18.9-4.4.csv	[19452]	1 Aleutian	Ingenstrem Depression	Ingenstrem Depression	1	1	W Aleutian	ALEUTIAN ARC / WESTERN ALEUTIAN ARC / INGENSTREM DEPRESSION	INGENSTREM DEPRESSION	52.514	52.514	175.21	175.21	SAQ	-1015	-1015	s_SO201-1B-16-006 [19452]	BASALT [19452]	late Pleistocene and Holocene,others<520ka									VOL					WR [19452]	51.81	0.78		16.35				7.6	10.12	8.92	0.16		0.95	3.06	0.26
ALEUTIAN_ARC 18.9-4.4.csv	[19452]	1 Aleutian	Ingenstrem Depression	Ingenstrem Depression	1	1	W Aleutian	ALEUTIAN ARC / WESTERN ALEUTIAN ARC / INGENSTREM DEPRESSION	INGENSTREM DEPRESSION	52.4842	52.4842	175.277	175.277	SAQ	-770	-770	s_TN182_08_012 [19452]	BASALT [19452]	late Pleistocene and Holocene,others<520ka									VOL					WR [19452]	51.85	0.72		17.71				7.27	8.63	9.59	0.15		0.68	3.22	0.16
ALEUTIAN_ARC 18.9-4.4.csv	[19452]	1 Aleutian	Ingenstrem Depression	Ingenstrem Depression	1	1	W Aleutian	ALEUTIAN ARC / WESTERN ALEUTIAN ARC / INGENSTREM DEPRESSION	INGENSTREM DEPRESSION	52.4842	52.4842	175.277	175.277	SAQ	-770	-770	s_TN182_08_011 [19452]	BASALT [19452]	late Pleistocene and Holocene,others<520ka									VOL					WR [19452]	51.87	0.73		17.8				7.27	8.71	9.39	0.16		0.68	3.23	0.16
ALEUTIAN_ARC 18.9-4.4.csv	[19452]	1 Aleutian	Ingenstrem Depression	Ingenstrem Depression	1	1	W Aleutian	ALEUTIAN ARC / WESTERN ALEUTIAN ARC / INGENSTREM DEPRESSION	INGENSTREM DEPRESSION	52.5301	52.5301	175.245	175.245	SAQ	-1567	-1567	s_TN182_07_007 [19452]	BASALT [19452]	late Pleistocene and Holocene,others<520ka									VOL					WR [19452]	51.89	0.79		18.36				7.42	9.07	7.97	0.16		0.8	3.37	0.17
ALEUTIAN_ARC 18.9-4.4.csv	[19452]	1 Aleutian	Ingenstrem Depression	Ingenstrem Depression	1	1	W Aleutian	ALEUTIAN ARC / WESTERN ALEUTIAN ARC / INGENSTREM DEPRESSION	INGENSTREM DEPRESSION	52.4842	52.4842	175.277	175.277	SAQ	-770	-770	s_TN182_08_009 [19452]	BASALT [19452]	late Pleistocene and Holocene,others<520ka									VOL					WR [19452]	51.9	0.79		18.33				7.33	9.03	8.1	0.16		0.81	3.38	0.17
ALEUTIAN_ARC 18.9-4.4.csv	[19452]	1 Aleutian	Ingenstrem Depression	Ingenstrem Depression	1	1	W Aleutian	ALEUTIAN ARC / WESTERN ALEUTIAN ARC / INGENSTREM DEPRESSION	INGENSTREM DEPRESSION	52.5301	52.5301	175.245	175.245	SAQ	-1567	-1567	s_TN182_07_008 [19452]	BASALT [19452]	late Pleistocene and Holocene,others<520ka									VOL					WR [19452]	51.9	0.79		18.42				7.33	9.05	7.91	0.16		0.81	3.46	0.17
ALEUTIAN_ARC 18.9-4.4.csv	[19452]	1 Aleutian	Ingenstrem Depression	Ingenstrem Depression	1	1	W Aleutian	ALEUTIAN ARC / WESTERN ALEUTIAN ARC / INGENSTREM DEPRESSION	INGENSTREM DEPRESSION	52.4842	52.4842	175.277	175.277	SAQ	-770	-770	s_TN182_08_005 [19452]	BASALT [19452]	late Pleistocene and Holocene,others<520ka									VOL					WR [19452]	51.92	0.72		18.26				7.23	8.99	8.69	0.16		0.64	3.23	0.16
ALEUTIAN_ARC 18.9-4.4.csv	[19452]	1 Aleutian	Ingenstrem Depression	Ingenstrem Depression	1	1	W Aleutian	ALEUTIAN ARC / WESTERN ALEUTIAN ARC / INGENSTREM DEPRESSION	INGENSTREM DEPRESSION	52.513	52.513	175.194	175.194	SAQ	-878	-878	s_SO201-1B-15-002 [19452]	BASALT [19452]	late Pleistocene and Holocene,others<520ka									VOL					WR [19452]	51.92	0.78		16.34				7.55	10.08	9	0.15		0.89	3.03	0.26
ALEUTIAN_ARC 18.9-4.4.csv	[19452]	1 Aleutian	Ingenstrem Depression	Ingenstrem Depression	1	1	W Aleutian	ALEUTIAN ARC / WESTERN ALEUTIAN ARC / INGENSTREM DEPRESSION	INGENSTREM DEPRESSION	52.4842	52.4842	175.277	175.277	SAQ	-770	-770	s_TN182_08_010 [19452]	BASALT [19452]	late Pleistocene and Holocene,others<520ka									VOL					WR [19452]	51.93	0.72		18.03				7.24	8.91	8.96	0.16		0.64	3.26	0.16
ALEUTIAN_ARC 18.9-4.4.csv	[19452]	1 Aleutian	Ingenstrem Depression	Ingenstrem Depression	1	1	W Aleutian	ALEUTIAN ARC / WESTERN ALEUTIAN ARC / INGENSTREM DEPRESSION	INGENSTREM DEPRESSION	52.4842	52.4842	175.277	175.277	SAQ	-770	-770	s_TN182_08_016 [19452]	BASALT [19452]	late Pleistocene and Holocene,others<520ka									VOL					WR [19452]	51.94	0.73		18.19				7.39	8.92	8.75	0.16		0.57	3.18	0.16
ALEUTIAN_ARC 18.9-4.4.csv	[19452]	1 Aleutian	Ingenstrem Depression	Ingenstrem Depression	1	1	W Aleutian	ALEUTIAN ARC / WESTERN ALEUTIAN ARC / INGENSTREM DEPRESSION	INGENSTREM DEPRESSION	52.5301	52.5301	175.245	175.245	SAQ	-1567	-1567	s_TN182_07_006 [19452]	BASALT [19452]	late Pleistocene and Holocene,others<520ka									VOL					WR [19452]	51.96	0.79		18.39				7.3	9.1	7.93	0.16		0.79	3.4	0.17
ALEUTIAN_ARC 18.9-4.4.csv	[19452]	1 Aleutian	Ingenstrem Depression	Ingenstrem Depression	1	1	W Aleutian	ALEUTIAN ARC / WESTERN ALEUTIAN ARC / INGENSTREM DEPRESSION	INGENSTREM DEPRESSION	52.478	52.478	175.297	175.297	SAQ	-795	-795	s_SO201-1B-20-007 [19452]	BASALT [19452]	late Pleistocene and Holocene,others<520ka									VOL					WR [19452]	52.08	0.8		16.88				7.66	8.68	9.58	0.16		0.74	3.24	0.17
ALEUTIAN_ARC 18.9-4.4.csv	[19452]	1 Aleutian	Ingenstrem Depression	Ingenstrem Depression	1	1	W Aleutian	ALEUTIAN ARC / WESTERN ALEUTIAN ARC / INGENSTREM DEPRESSION	INGENSTREM DEPRESSION	52.4842	52.4842	175.277	175.277	SAQ	-770	-770	s_TN182_08_015 [19452]	BASALT [19452]	late Pleistocene and Holocene,others<520ka									VOL					WR [19452]	52.12	0.73		18.18				7.15	8.89	8.82	0.15		0.59	3.22	0.15
ALEUTIAN_ARC 18.9-4.4.csv	[19452]	1 Aleutian	Ingenstrem Depression	Ingenstrem Depression	1	1	W Aleutian	ALEUTIAN ARC / WESTERN ALEUTIAN ARC / INGENSTREM DEPRESSION	INGENSTREM DEPRESSION	52.4842	52.4842	175.277	175.277	SAQ	-770	-770	s_TN182_08_001 [19452]	BASALT [19452]	late Pleistocene and Holocene,others<520ka									VOL					WR [19452]	52.13	0.73		17.89				7.19	8.75	9.04	0.16		0.7	3.24	0.17
ALEUTIAN_ARC 18.9-4.4.csv	[19452]	1 Aleutian	Ingenstrem Depression	Ingenstrem Depression	1	1	W Aleutian	ALEUTIAN ARC / WESTERN ALEUTIAN ARC / INGENSTREM DEPRESSION	INGENSTREM DEPRESSION	52.4842	52.4842	175.277	175.277	SAQ	-770	-770	s_TN182_08_002 [19452]	BASALT [19452]	late Pleistocene and Holocene,others<520ka									VOL					WR [19452]	52.17	0.73		18.23				7.11	8.85	8.7	0.15		0.63	3.31	0.12
ALEUTIAN_ARC 18.9-4.4.csv	[19452]	1 Aleutian	Ingenstrem Depression	Ingenstrem Depression	1	1	W Aleutian	ALEUTIAN ARC / WESTERN ALEUTIAN ARC / INGENSTREM DEPRESSION	INGENSTREM DEPRESSION	52.4842	52.4842	175.277	175.277	SAQ	-770	-770	s_TN182_08_007 [19452]	BASALT [19452]	late Pleistocene and Holocene,others<520ka									VOL					WR [19452]	52.17	0.73		18.01				7.07	8.82	9.07	0.16		0.64	3.18	0.16
ALEUTIAN_ARC 18.9-4.4.csv	[19452]	1 Aleutian	Ingenstrem Depression	Ingenstrem Depression	1	1	W Aleutian	ALEUTIAN ARC / WESTERN ALEUTIAN ARC / INGENSTREM DEPRESSION	INGENSTREM DEPRESSION	52.4842	52.4842	175.277	175.277	SAQ	-770	-770	s_TN182_08_008 [19452]	BASALT [19452]	late Pleistocene and Holocene,others<520ka									VOL					WR [19452]	52.21	0.76		18.13				7.46	9.01	8.2	0.16		0.69	3.22	0.17
ALEUTIAN_ARC 18.9-4.4.csv	[19452]	1 Aleutian	Ingenstrem Depression	Ingenstrem Depression	1	1	W Aleutian	ALEUTIAN ARC / WESTERN ALEUTIAN ARC / INGENSTREM DEPRESSION	INGENSTREM DEPRESSION	52.4842	52.4842	175.277	175.277	SAQ	-770	-770	s_TN182_08_004 [19452]	BASALT [19452]	late Pleistocene and Holocene,others<520ka									VOL					WR [19452]	52.31	0.73		18.03				7.01	8.78	8.83	0.15		0.68	3.32	0.17
ALEUTIAN_ARC 18.9-4.4.csv	[19452]	1 Aleutian	Ingenstrem Depression	Ingenstrem Depression	1	1	W Aleutian	ALEUTIAN ARC / WESTERN ALEUTIAN ARC / INGENSTREM DEPRESSION	INGENSTREM DEPRESSION	52.4716	52.4716	175.33	175.33	SAQ	-791	-791	s_TN182_13_004 [19452]	ANDESITE, BASALTIC [19452]	late Pleistocene and Holocene,others<520ka									VOL					WR [19452]	53.13	0.74		18.08				7.26	8.71	7.59	0.15		0.8	3.38	0.18
ALEUTIAN_ARC 18.9-4.4.csv	[19452]	1 Aleutian	Ingenstrem Depression	Ingenstrem Depression	1	1	W Aleutian	ALEUTIAN ARC / WESTERN ALEUTIAN ARC / INGENSTREM DEPRESSION	INGENSTREM DEPRESSION	52.4716	52.4716	175.33	175.33	SAQ	-791	-791	s_TN182_13_002 [19452]	ANDESITE, BASALTIC [19452]	late Pleistocene and Holocene,others<520ka									VOL					WR [19452]	53.25	0.74		18.16				7.16	8.78	7.39	0.15		0.81	3.38	0.18
ALEUTIAN_ARC 18.9-4.4.csv	[19452]	1 Aleutian	Ingenstrem Depression	Ingenstrem Depression	1	1	W Aleutian	ALEUTIAN ARC / WESTERN ALEUTIAN ARC / INGENSTREM DEPRESSION	INGENSTREM DEPRESSION	52.4716	52.4716	175.33	175.33	SAQ	-791	-791	s_TN182_13_003 [19452]	ANDESITE, BASALTIC [19452]	late Pleistocene and Holocene,others<520ka									VOL					WR [19452]	53.26	0.74		18.06				7.2	8.71	7.57	0.15		0.79	3.35	0.18
ALEUTIAN_ARC 18.9-4.4.csv	[19452]	1 Aleutian	Ingenstrem Depression	Ingenstrem Depression	1	1	W Aleutian	ALEUTIAN ARC / WESTERN ALEUTIAN ARC / INGENSTREM DEPRESSION	INGENSTREM DEPRESSION	52.4716	52.4716	175.33	175.33	SAQ	-791	-791	s_TN182_13_005 [19452]	ANDESITE, BASALTIC [19452]	late Pleistocene and Holocene,others<520ka									VOL					WR [19452]	53.54	0.75		18.08				6.94	8.76	7.41	0.16		0.83	3.36	0.18
ALEUTIAN_ARC 18.9-4.4.csv	[19452]	1 Aleutian	Ingenstrem Depression	Ingenstrem Depression	1	1	W Aleutian	ALEUTIAN ARC / WESTERN ALEUTIAN ARC / INGENSTREM DEPRESSION	INGENSTREM DEPRESSION	52.478	52.478	175.297	175.297	SAQ	-795	-795	s_SO201-1B-20-009 [19452]	ANDESITE, BASALTIC [19452]	late Pleistocene and Holocene,others<520ka									VOL					WR [19452]	54.78	0.79		18.27				6.72	8.02	6.39	0.15		0.93	3.79	0.17
ALEUTIAN_ARC 18.9-4.4.csv	[6565]	1 Aleutian	Kiska	Kiska	2	1	W Aleutian	ALEUTIAN ARC / CENTRAL ALEUTIAN ARC / RAT ISLANDS / KISKA		52	52	177.5	177.5	SAE			s_54-445 [6565]	NOT GIVEN [6565]	Historical				HISTORICAL [6565]					VOL					WR [6565]	49.29	0.82		15.64				9.05	9.93	10.7	0.15		0.44	2.61	0.11
ALEUTIAN_ARC 18.9-4.4.csv	[7197]	1 Aleutian	Kanaga	Kanaga	3	2	C Aleutian	ALEUTIAN ARC / CENTRAL ALEUTIAN ARC / KANAGA / ROUNDHEAD		51.87	51.87	-177.07	-177.07	SAE			s_KG 3 [7197]	BASALT [7197]	ok									VOL					WR [7197]	49.21	0.91		16.14				10.45	11.27	7.01	0.18		1.01	2.62	0.16
ALEUTIAN_ARC 18.9-4.4.csv	[7197]	1 Aleutian	Kanaga	Kanaga	3	2	C Aleutian	ALEUTIAN ARC / CENTRAL ALEUTIAN ARC / KANAGA / ROUNDHEAD		51.87	51.87	-177.07	-177.07	SAE			s_KG 4 [7197]	BASALT [7197]	ok									VOL					WR [7197]	49.61	1		17.41				11.31	10.62	6.11	0.18		1.23	2.74	0.22
ALEUTIAN_ARC 18.9-4.4.csv	[16078]	1 Aleutian	Tanaga	Kanaga	3	2	C Aleutian	ALEUTIAN ARC / CENTRAL ALEUTIAN ARC / TANAGA / PRE-TANAGA VOLCANICS	SOLUMNAR JOINTED SITS, ON TOP OF OLD DEBRIS LAVA	51.8	51.93	-178.01	-178.2	SAE			s_03TGGM111 [16078]	BASALT [16078]	<0.3Ma									VOL					WR [16078]	46.6	1.149		17.18				10.82	13.38	7.71	0.187		0.73	2.07	0.165
ALEUTIAN_ARC 18.9-4.4.csv	[16078]	1 Aleutian	Tanaga	Kanaga	3	2	C Aleutian	ALEUTIAN ARC / CENTRAL ALEUTIAN ARC / TANAGA / PRE-TANAGA VOLCANICS	DIKE IN S WALL OF OUTLET CUTBANK	51.8	51.93	-178.01	-178.2	SAE			s_03TGGM116 [16078]	BASALT [16078]	<0.3Ma									VOL					WR [16078]	47.64	1.01		18.65				10.47	10.99	6.77	0.185		1.276	2.74	0.266
ALEUTIAN_ARC 18.9-4.4.csv	[16078]	1 Aleutian	Tanaga	Kanaga	3	2	C Aleutian	ALEUTIAN ARC / CENTRAL ALEUTIAN ARC / TANAGA / PRE-TANAGA VOLCANICS	SMALL LAVA KNOB ON GRASSY SLOPE, OLD PACKAGE	51.8	51.93	-178.01	-178.2	SAE			s_03TGMC61 [16078]	BASALT [16078]	<0.3Ma									VOL					WR [16078]	46.99	1.191		16.56				11.11	12.43	8.25	0.187		0.741	2.4	0.138
ALEUTIAN_ARC 18.9-4.4.csv	[16078]	1 Aleutian	Tanaga	Kanaga	3	2	C Aleutian	ALEUTIAN ARC / CENTRAL ALEUTIAN ARC / TANAGA / PRE-TANAGA VOLCANICS	BLOCK AND ASH FLOW DEPOSIT	51.8	51.93	-178.01	-178.2	SAE			s_TAN-07-22 [16078]	BASALT [16078]	<0.3Ma									VOL					WR [16078]	47.62	1.197		18.19				10.59	11.76	6.19	0.19		1.126	2.81	0.329
ALEUTIAN_ARC 18.9-4.4.csv	[16078]	1 Aleutian	Tanaga	Kanaga	3	2	C Aleutian	ALEUTIAN ARC / CENTRAL ALEUTIAN ARC / TANAGA	SOUTH RIDGE, LOWEST LAVA EXPOSED IN W VALLEY WALL	51.8	51.93	-178.01	-178.2	SAE			s_03TGGM106 [16078]	BASALT [16078]	<0.3Ma									VOL					WR [16078]	46.87	1.267		18.03				11.65	11.96	6.01	0.197		0.985	2.78	0.244
ALEUTIAN_ARC 18.9-4.4.csv	[16078]	1 Aleutian	Tanaga	Kanaga	3	2	C Aleutian	ALEUTIAN ARC / CENTRAL ALEUTIAN ARC / TANAGA	SOUTH RIDGE, LAVA DIKE SW	51.8	51.93	-178.01	-178.2	SAE			s_03TGGM107 [16078]	BASALT [16078]	<0.3Ma									VOL					WR [16078]	49.66	0.875		16.43				9.93	11.4	8	0.176		0.884	2.48	0.153
ALEUTIAN_ARC 18.9-4.4.csv	[16078]	1 Aleutian	Tanaga	Kanaga	3	2	C Aleutian	ALEUTIAN ARC / CENTRAL ALEUTIAN ARC / TANAGA	SOUTH RIDGE, 1 M THICK LOBE AT BASE OF SECTION	51.8	51.93	-178.01	-178.2	SAE			s_TAN-07-05 [16078]	BASALT [16078]	<0.3Ma									VOL					WR [16078]	48.21	1.021		17.03				10.39	11.69	7.61	0.187		1.072	2.52	0.264
ALEUTIAN_ARC 18.9-4.4.csv	[16078]	1 Aleutian	Tanaga	Kanaga	3	2	C Aleutian	ALEUTIAN ARC / CENTRAL ALEUTIAN ARC / TANAGA / TAKAWANGHA		51.8	51.93	-178.01	-178.2	SAE			s_03TGBB65 [16078]	BASALT [16078]	<0.3Ma									VOL					WR [16078]	49.56	1.026		18.37				10.21	9.98	6.08	0.187		1.416	2.92	0.248
ALEUTIAN_ARC 18.9-4.4.csv	[16078]	1 Aleutian	Tanaga	Kanaga	3	2	C Aleutian	ALEUTIAN ARC / CENTRAL ALEUTIAN ARC / TANAGA / TANAGA	30 M THICK AGGLUTINATE BOMB LAYER	51.8	51.93	-178.01	-178.2	SAE			s_03TGMC26 [16078]	BASALT [16078]	<0.3Ma									VOL					WR [16078]	49.67	0.993		18.55				9.5	10.78	6.32	0.168		0.871	2.97	0.187
ALEUTIAN_ARC 18.9-4.4.csv	[16078]	1 Aleutian	Tanaga	Kanaga	3	2	C Aleutian	ALEUTIAN ARC / CENTRAL ALEUTIAN ARC / TANAGA / UPPER SOUTH RIDGE	OVERLIES THE LOWER LAVA PACKAGE	51.8	51.93	-178.01	-178.2	SAE			s_03TGGM108 [16078]	BASALT [16078]	<0.3Ma									VOL					WR [16078]	49.89	0.83		16				9.64	11.84	8.29	0.17		0.806	2.39	0.148
ALEUTIAN_ARC 18.9-4.4.csv	[16078]	1 Aleutian	Tanaga	Kanaga	3	2	C Aleutian	ALEUTIAN ARC / CENTRAL ALEUTIAN ARC / TANAGA / UPPER SOUTH RIDGE	LOWERMOST LAVA IN UPPER SOUTH RIDGE SECTION, ABOVE YELLOW BEDS	51.8	51.93	-178.01	-178.2	SAE			s_TAN-07-09 [16078]	BASALT [16078]	<0.3Ma									VOL					WR [16078]	50.07	0.881		16.5				9.78	11.57	7.52	0.171		0.812	2.54	0.161
ALEUTIAN_ARC 18.9-4.4.csv	[6565][2195][4190]	1 Aleutian	Kasatoch	Kasatoch	4	2	C Aleutian	ALEUTIAN ARC / CENTRAL ALEUTIAN ARC / KASATOCHI / KASATOCHI		52.17	52.17	-175.5	-175.5	SAE			s_K81-7A [6565]	NOT GIVEN [6565] / ANDESITE [2195]								1899		VOL					WR [6565]	49.07	0.66		15.75			9.8	8.82	12.52	8.77	0.14		0.76	2.24	0.15
ALEUTIAN_ARC 18.9-4.4.csv	[7197]	1 Aleutian	Seguam	Seguam	5	2	C Aleutian	ALEUTIAN ARC / CENTRAL ALEUTIAN ARC / SEGUAM / SEGUAM	SHIELD VOLCANO	52.33	52.33	-172.4	-172.4	SAE			s_SB87-22 [7197]	NOT GIVEN [7197]	ok									VOL					WR [7197]	51.17	0.67		18.2				8.84	10.29	7.27	0.15		0.55	2.44	0.08
ALEUTIAN_ARC 18.9-4.4.csv	[7197]	1 Aleutian	Seguam	Seguam	5	2	C Aleutian	ALEUTIAN ARC / CENTRAL ALEUTIAN ARC / SEGUAM / SEGUAM	SHIELD VOLCANO	52.33	52.33	-172.4	-172.4	SAE			s_SJ87-79 [7197]	NOT GIVEN [7197]	ok									VOL					WR [7197]	50.65	0.76		19.78				8.88	11.18	6.04	0.15		0.34	2.34	0.07
ALEUTIAN_ARC 18.9-4.4.csv	[7197]	1 Aleutian	Seguam	Seguam	5	2	C Aleutian	ALEUTIAN ARC / CENTRAL ALEUTIAN ARC / SEGUAM / SEGUAM	SHIELD VOLCANO	52.33	52.33	-172.4	-172.4	SAE			s_SJ88-6 [7197]	NOT GIVEN [7197]	ok									VOL					WR [7197]	51.75	0.68		18.62				8.35	10.8	7.07	0.14		0.4	2.36	0.08
ALEUTIAN_ARC 18.9-4.4.csv	[9411]	1 Aleutian	Seguam	Seguam	5	2	C Aleutian	ALEUTIAN ARC / CENTRAL ALEUTIAN ARC / SEGUAM / SEGUAM		52.3042	52.3042	-172.375	-172.375	SAE			s_SEG 03 74 [9411]	BASALT [9411]	Pleistocene-Holocene									VOL					WR [9411]	50.54	0.63		20.19				7.87	11.71	6.48	0.13		0.3	2.29	0.08
ALEUTIAN_ARC 18.9-4.4.csv	[2238]	1 Aleutian	Okmok	Okmok	6	3	E Aleutian	ALEUTIAN ARC / SECOND ALEUTIAN ARC / UMNAK / OKMOK	FAULT-BOUNDED BLOCK, NORTHEAST CORNER OF THE ISLAND	53.37	53.37	-168.03	-168.03	SAE	1829	1829	s_ID12 [2238]	THOLEIITE [2238]	<Pleistocene									VOL					WR [2238]	52.3	0.97		16.98		1.09	8.22		10.34	6.02	0.19		0.8	2.9	0.18
ALEUTIAN_ARC 18.9-4.4.csv	[2238][2578]	1 Aleutian	Okmok	Okmok	6	3	E Aleutian	ALEUTIAN ARC / SECOND ALEUTIAN ARC / UMNAK / OKMOK	FAULT-BOUNDED BLOCK, NORTHEAST CORNER OF THE ISLAND	53.37	53.37	-168.03	-168.03	SAE	1829	1829	s_ID16 [2238]	THOLEIITE [2238]	<Pleistocene									VOL					WR [2238]	48.94	0.7		16.01		1.06	7.95		10.89	11.42	0.17		0.52	2.21	0.12
ALEUTIAN_ARC 18.9-4.4.csv	[2238]	1 Aleutian	Okmok	Okmok	6	3	E Aleutian	ALEUTIAN ARC / SECOND ALEUTIAN ARC / UMNAK / OKMOK	FAULT-BOUNDED BLOCK, NORTHEAST CORNER OF THE ISLAND	53.37	53.37	-168.03	-168.03	SAE	1829	1829	s_ID18 [2238]	THOLEIITE [2238]	<Pleistocene									VOL					WR [2238]	49.16	0.87		17		1.13	8.5		12.38	8.05	0.18		0.41	2.2	0.12
ALEUTIAN_ARC 18.9-4.4.csv	[2238]	1 Aleutian	Okmok	Okmok	6	3	E Aleutian	ALEUTIAN ARC / SECOND ALEUTIAN ARC / UMNAK / OKMOK	FAULT-BOUNDED BLOCK, NORTHEAST CORNER OF THE ISLAND	53.37	53.37	-168.03	-168.03	SAE	1829	1829	s_ID25 [2238]	THOLEIITE [2238]	<Pleistocene									VOL					WR [2238]	49.33	0.64		17.61		0.99	7.4		12.22	8.62	0.16		0.5	2.43	0.11
ALEUTIAN_ARC 18.9-4.4.csv	[2238]	1 Aleutian	Okmok	Okmok	6	3	E Aleutian	ALEUTIAN ARC / SECOND ALEUTIAN ARC / UMNAK / OKMOK	BASE OF CALDERA WALL SOUTH OF CRATER CREEK	53.37	53.37	-168.03	-168.03	SAE	1829	1829	s_OK2 [2238]	THOLEIITE [2238]	<Pleistocene									VOL					WR [2238]	50.1	0.83		17.39		1.07	8.01		12.1	7.1	0.17		0.57	2.54	0.12
ALEUTIAN_ARC 18.9-4.4.csv	[6565]	1 Aleutian	Umnak	Okmok	6	3	E Aleutian	ALEUTIAN ARC / SECOND ALEUTIAN ARC / UMNAK		53.33	53.33	-168.33	-168.33	SAE			s_46ABY531 [6565]	NOT GIVEN [6565]								1946		VOL					WR [6565]	48.07	0.73		15.61				9.09	10.76	12.68	0.17		0.48	1.86	0.12
ALEUTIAN_ARC 18.9-4.4.csv	[2218][6582][2251]	1 Aleutian	Recheshnoi	Okmok	6	3	E Aleutian	ALEUTIAN ARC / SECOND ALEUTIAN ARC / UMNAK / RECHESHNOI		53.2556	53.2556	-168.546	-168.546	SAE			s_LUM21 [2218]	ANDESITE [2218]	8250-now									VOL			F		WR [2218]	50.07	0.72		15.92				8.15	10.12	10.1	0.15		0.86	2.35	0.13
ALEUTIAN_ARC 18.9-4.4.csv	[6565]	1 Aleutian	Makushin	Makushin	7	3	E Aleutian	ALEUTIAN ARC / SECOND ALEUTIAN ARC / UNALASKA / MAKUSHIN	MAKUSHIN VOLCANIC FIELD	53.67	53.67	-166.67	-166.67	SAE			s_96PN08 [6565]	NOT GIVEN [6565]	Historical				HISTORICAL [6565]					VOL					WR [6565]	50.93	0.82		16.81				9.02	11.29	7.06	0.18		0.88	2.87	0.16
ALEUTIAN_ARC 18.9-4.4.csv	[4867][7197]	1 Aleutian	Shishaldin	Shishaldin	8	3	E Aleutian	ALEUTIAN ARC / SECOND ALEUTIAN ARC / UNIMAK / SHISHALDIN		54.75	54.75	-163.97	-163.97	SAQ			s_SH-15 [4867] / s_SH 15 [7197]	BASALT [4867]	late Quaternary									VOL					WR [4867]	48.7	1.18		15.26				9.72	10.95	8.53	0.16		0.71	2.61	0.18
ALEUTIAN_ARC 18.9-4.4.csv	[6565]	2 Alaska	Trident	Trident	9	4	Alaska	ALEUTIAN ARC / ALASKA PENINSULA / UPPER ALASKA PENINSULA / SOUTHWEST TRIDENT	KATMAI NATIONAL PARK	58.2	58.2	-155.1	-155.1	SAE			s_97ND02 [6565]	NOT GIVEN [6565]								1912		VOL					WR [6565]	55.16	0.83		17.31				8.61	4.83	9.2	0.15		0.86	2.92	0.14
ALEUTIAN_ARC 18.9-4.4.csv	[6565]	2 Alaska	Trident	Trident	9	4	Alaska	ALEUTIAN ARC / ALASKA PENINSULA / UPPER ALASKA PENINSULA / SOUTHWEST TRIDENT	KATMAI NATIONAL PARK	58.2	58.2	-155.1	-155.1	SAE			s_97NT18 [6565]	NOT GIVEN [6565]								1958		VOL					WR [6565]	56.87	0.81		17.77				6.99	4.33	8.5	0.15		0.95	3.49	0.14
ALEUTIAN_ARC 18.9-4.4.csv	[14934]	2 Alaska	Novarupta	Novarupta	10	4	Alaska	ALEUTIAN ARC / ALASKA PENINSULA / UPPER ALASKA PENINSULA / KATMAI GROUP	NOVARUPTA 1912 EJECTA, VALLEY OF TEN THOUSAND SMOKES	58.3	58.3	-155.16	-155.16	SAE			s_K0543 [14934]	BASALT [14934]	year 1912							1912		VOL					WR [14934]	50.41	0.69		14.03			10.13		10.12	11.43	0.17		0.5	2.02	0.09
ALEUTIAN_ARC 18.9-4.4.csv	[6992]	1(2) Alaska rear-arc	Ukinrek Maars	Ukinrek Maars	13	5	Alaska rear-arc	ALEUTIAN ARC / ALASKA PENINSULA / UPPER ALASKA PENINSULA	UKINREK MAARS, NEAR BECHAROF LAKE, 13 KM NW OF MOUNT PEULIK	57.83	57.83	-156.51	-156.51	SAE			s_2687 [6992]	BASALT [6992]	year 1977									VOL					WR [6992]	47.68	1.08		17.12				9.97	10.25	9.59	0.18		0.72	2.79	0.24
ALEUTIAN_ARC 18.9-4.4.csv	[6565][7092]	1(2) Alaska rear-arc	Ukinrek Maars	Ukinrek Maars	13	5	Alaska rear-arc	ALEUTIAN ARC / ALASKA PENINSULA / UPPER ALASKA PENINSULA	UKINREK MAARS, NEAR BECHAROF LAKE, 13 KM NW OF MOUNT PEULIK	57.83	57.83	-156.51	-156.51	SAE			s_UK-25B [6565]	NOT GIVEN [6565]	AGU abstract,no data found							1977		VOL					WR [6565]	48.98	1.05		16.9				9.67	9.79	9.26			0.82	3.13	0.23
ALEUTIAN_ARC 18.9-4.4.csv	[6992]	1(2) Alaska rear-arc	Gertrude Creek	Gertrude Creek	14	5	Alaska rear-arc	ALEUTIAN ARC / ALASKA PENINSULA / UPPER ALASKA PENINSULA / KATMAI GROUP	KATMAI NATIONAL PARK, SADDLEHORN CLUSTER, GERTRUDE CREEK	58.04	58.04	-156.14	-156.14	SAE			s_2503 [6992]	BASALT [6992]	0.5Ma									VOL					WR [6992]	49.78	1.07		17.83				9.64	10.54	6.79	0.17		0.72	2.83	0.26
ALEUTIAN_ARC 18.9-4.4.csv	[6992]	1(2) Alaska rear-arc	Savonoski River Cluster	Savonoski River Cluster	11	5	Alaska rear-arc	ALEUTIAN ARC / ALASKA PENINSULA / UPPER ALASKA PENINSULA / KATMAI GROUP	KATMAI NATIONAL PARK, SAVONOSKI CLUSTER, KNOB 1000	58.59	58.59	-154.56	-154.56	SAE			s_1000 [6992]	BASALT [6992]	Pleistocene rear/front									VOL					WR [6992]	51.94	0.73		16.03				9.13	10.75	7.79	0.17		0.7	2.11	0.24
ALEUTIAN_ARC 18.9-4.4.csv	[6992]	1(2) Alaska rear-arc	Savonoski River Cluster	Savonoski River Cluster	11	5	Alaska rear-arc	ALEUTIAN ARC / ALASKA PENINSULA / UPPER ALASKA PENINSULA / KATMAI GROUP	KATMAI NATIONAL PARK, SAVONOSKI CLUSTER, CONE 3110, BRECCIATED LAVA FLOW HIGH ON NW RIDGE OF CONE	58.58	58.58	-154.53	-154.53	SAE			s_2594 [6992]	BASALT [6992]	235ka									VOL					WR [6992]	51.41	0.81		17				9.42	10.46	7.41	0.17		0.47	2.21	0.22
ALEUTIAN_ARC 18.9-4.4.csv	[6992]	1(2) Alaska rear-arc	Savonoski River Cluster	Savonoski River Cluster	11	5	Alaska rear-arc	ALEUTIAN ARC / ALASKA PENINSULA / UPPER ALASKA PENINSULA / KATMAI GROUP	KATMAI NATIONAL PARK, SAVONOSKI CLUSTER, IRON TRIG CONE, TERMINAL SCARP OF LAVA FLOW PLATEAU EXTENDING SW FROM CONE	58.64	58.64	-154.47	-154.47	SAE			s_2671C [6992]	NOT GIVEN [6992]	88ka									VOL					WR [6992]	53.23	0.73		16.47				8.56	10.65	6.93	0.16		0.51	2.19	0.17
ALEUTIAN_ARC 18.9-4.4.csv	[8487]	1(2) Alaska rear-arc	Aniakchak	Aniakchak	12	5	Alaska rear-arc	ALEUTIAN ARC / ALASKA PENINSULA / COLD BAY / ANIAKCHAK	CALDERA STAGE	56.88	56.88	-158.17	-158.17	SAE			s_99AC35 [8487]	ANDESITE [8487]	3400 [8487]	3400 [8487]	3400 [8487]							VOL					WR [8487]	56.8	1.4		16.3				8.29	3.16	6.78	0.21		4.17	1.42	0.57
ALEUTIAN_ARC 18.9-4.4.csv	[8487]	1(2) Alaska rear-arc	Aniakchak	Aniakchak	12	5	Alaska rear-arc	ALEUTIAN ARC / ALASKA PENINSULA / COLD BAY / ANIAKCHAK	CALDERA STAGE	56.88	56.88	-158.17	-158.17	SAE			s_92CNA22 [8487]	BASALT [8487]	3400 [8487]	3400 [8487]	3400 [8487]							VOL					WR [8487]	52.5	1.17		18.1				9.39	4.37	10.1	0.18		3.03	0.94	0.2
ALEUTIAN_ARC 18.9-4.4.csv	[8487]	1(2) Alaska rear-arc	Aniakchak	Aniakchak	12	5	Alaska rear-arc	ALEUTIAN ARC / ALASKA PENINSULA / COLD BAY / ANIAKCHAK	CALDERA STAGE	56.88	56.88	-158.17	-158.17	SAE			s_NA94-7 [8487]	BASALT [8487]	3400 [8487]	3400 [8487]	3400 [8487]							VOL					WR [8487]	54.5	1.34		17				9.8	3.75	8.4	0.2		3.53	1.19	0.25
CASCADES 38.8-1.9.csv	[20728]	3 Cascades	Silverthrone	Silverthrone	15	6	N Cascades	CASCADES / GARIBALDI VOLCANIC BELT / WASHINGTON / SILVERTHRONE VOLCANIC FIELD / KLINAKLINI RIVER FLOW		51.2854	51.2854	-125.748	-125.748	SAE			s_KLINAKLINI RIVER [20728]	BASALT, THOLEIITIC [20728]	Quaternary									VOL					WR [20728]	47.1	1.9		16.85	0.01			11.21	10.6	7.14	0.178		0.51	2.74	0.32
CASCADES 38.8-1.9.csv	[7175][19246]	3 Cascades	Garibaldi	Garibaldi	16	6	N Cascades	CASCADES / HIGH CASCADES / BRITISH COLUMBIA / MOUNT GARIBALDI VOLCANIC FIELD	BRIDGE RIVER CONES, TUBER HILL	50.92	50.92	-123.41	-123.41	SAE			s_BRC09-3 [7175]	BASALT [7175] / BASALT, TRANSITIONAL [19246]	Quaternary									VOL			F		WR [7175]	48.02	2		15.92				11.21	9.34	7.9	0.18		0.57	3.31	0.32
CASCADES 38.8-1.9.csv	[7175][19246]	3 Cascades	Garibaldi	Garibaldi	16	6	N Cascades	CASCADES / HIGH CASCADES / BRITISH COLUMBIA / MOUNT GARIBALDI VOLCANIC FIELD	BRIDGE RIVER CONES, NICHOLS VALLEY	50.92	50.92	-123.38	-123.38	SAE			s_BRC10 [7175]	BASALT [7175] / BASALT, ALKALINE [19246]	Quaternary									VOL			F		WR [7175]	45.1	1.92		13.81				12.88	9.85	9.69	0.2		0.74	4.11	0.28
CASCADES 38.8-1.9.csv	[7175][19246]	3 Cascades	Garibaldi	Garibaldi	16	6	N Cascades	CASCADES / HIGH CASCADES / BRITISH COLUMBIA / MOUNT GARIBALDI VOLCANIC FIELD	SALAL GLACIER, NW VOLCANIC REMNANT	50.81	50.81	-123.45	-123.45	SAE			s_SG01-2 [7175]	BASALT [7175] / BASALT, ALKALINE [19246]	Quaternary									VOL			F		WR [7175]	46.64	1.94		15.08				11.08	8.66	9.84	0.18		1.2	3.65	0.5
CASCADES 38.8-1.9.csv	[7175][19246]	3 Cascades	Garibaldi	Garibaldi	16	6	N Cascades	CASCADES / HIGH CASCADES / BRITISH COLUMBIA / MOUNT GARIBALDI VOLCANIC FIELD	SALAL GLACIER, NW VOLCANIC REMNANT	50.81	50.81	-123.45	-123.45	SAE			s_SG01-3 [7175]	BASALT [7175] / BASALT, ALKALINE [19246]	Quaternary									VOL			F		WR [7175]	45.29	2.33		16.23				12.8	8.87	8.5	0.24		1.05	2.87	0.4
CASCADES 38.8-1.9.csv	[7175][19246]	3 Cascades	Garibaldi	Garibaldi	16	6	N Cascades	CASCADES / HIGH CASCADES / BRITISH COLUMBIA / MOUNT GARIBALDI VOLCANIC FIELD	MOUNT MEAGER	50.69	50.69	-123.57	-123.57	SAE			s_MM02 [7175]	BASALT [7175] / BASALT, TRANSITIONAL [19246]	Quaternary									VOL			F		WR [7175]	48.64	1.65		16.01				10.37	9.14	8.43	0.18		0.76	3.34	0.31
CASCADES 38.8-1.9.csv	[7175][19246]	3 Cascades	Garibaldi	Garibaldi	16	6	N Cascades	CASCADES / HIGH CASCADES / BRITISH COLUMBIA / MOUNT GARIBALDI VOLCANIC FIELD	MOUNT MEAGER	50.69	50.69	-123.57	-123.57	SAE			s_MM04 [7175]	BASALT [7175] / BASALT, TRANSITIONAL [19246]	Quaternary									VOL			F		WR [7175]	48.94	1.73		15.46				10.82	9.03	8.01	0.17		0.9	3.42	0.33
CASCADES 38.8-1.9.csv	[7175][19246]	3 Cascades	Garibaldi	Garibaldi	16	6	N Cascades	CASCADES / HIGH CASCADES / BRITISH COLUMBIA / MOUNT GARIBALDI VOLCANIC FIELD	MOUNT MEAGER	50.55	50.55	-123.53	-123.53	SAE			s_MM08 [7175]	BASALT [7175] / BASALT, TRANSITIONAL [19246]	Quaternary									VOL			F		WR [7175]	49.68	1.59		15.18				10.83	9	7.95	0.16		0.76	3.39	0.25
CASCADES 38.8-1.9.csv	[7175]	3 Cascades	Garibaldi	Garibaldi	16	6	N Cascades	CASCADES / HIGH CASCADES / BRITISH COLUMBIA / MOUNT GARIBALDI VOLCANIC FIELD	SALAL GLACIER	50.81	50.81	-123.45	-123.45	SAE			s_SG01-1A [7175]	BASALT [7175]	Quaternary									VOL			F		WR [7175]	46.38	2.16		16.01				11.07	9.87	7.48	0.17		1.24	3.91	0.48
CASCADES 38.8-1.9.csv	[7175]	3 Cascades	Garibaldi	Garibaldi	16	6	N Cascades	CASCADES / HIGH CASCADES / BRITISH COLUMBIA / MOUNT GARIBALDI VOLCANIC FIELD	SALAL GLACIER	50.81	50.81	-123.45	-123.45	SAE			s_SG01-3A [7175]	BASALT [7175]	Quaternary									VOL			F		WR [7175]	46.62	1.96		15.31				11.03	8.75	9.57	0.18		1.23	3.62	0.51
CASCADES 38.8-1.9.csv	[7175]	3 Cascades	Garibaldi	Garibaldi	16	6	N Cascades	CASCADES / HIGH CASCADES / BRITISH COLUMBIA / MOUNT GARIBALDI VOLCANIC FIELD	MEAGER MOUNTAIN	50.65	50.65	-123.59	-123.59	SAE			s_MM01-1 [7175]	BASALT [7175]	Quaternary									VOL			F		WR [7175]	48.84	1.64		16.79				9.26	9.93	6.31	0.15		1.41	4.11	0.54
CASCADES 38.8-1.9.csv	[7175]	3 Cascades	Garibaldi	Garibaldi	16	6	N Cascades	CASCADES / HIGH CASCADES / BRITISH COLUMBIA / MOUNT GARIBALDI VOLCANIC FIELD	ELAHO VALLEY	50.52	50.52	-123.58	-123.58	SAE			s_EV01-3 [7175]	BASALT [7175]	Quaternary									VOL			F		WR [7175]	50.31	1.68		16.93				9.74	9.18	6.16	0.15		0.75	3.67	0.34
CASCADES 38.8-1.9.csv	[7175][19246]	3 Cascades	Garibaldi	Garibaldi	16	6	N Cascades	CASCADES / HIGH CASCADES / BRITISH COLUMBIA / MOUNT GARIBALDI VOLCANIC FIELD	SALAL GLACIER, THE ELEPHANT	50.78	50.78	-123.39	-123.39	SAE			s_SG10 [7175]	BASALT [7175] / BASALT, ALKALINE [19246]	Quaternary									VOL			F		WR [7175]	46.04	2.05		14.28				11.74	8.82	10.74	0.18		0.87	3.53	0.45
CASCADES 38.8-1.9.csv	[7175][19246]	3 Cascades	Garibaldi	Garibaldi	16	6	N Cascades	CASCADES / HIGH CASCADES / BRITISH COLUMBIA / MOUNT GARIBALDI VOLCANIC FIELD	SALAL GLACIER, THE ELEPHANT	50.77	50.77	-123.4	-123.4	SAE			s_SG12 [7175]	BASALT [7175] / BASALT, ALKALINE [19246]	Quaternary									VOL			F		WR [7175]	46.71	2.08		14.34				11.78	8.91	11.14	0.18		1.09	2.05	0.42
CASCADES 38.8-1.9.csv	[7175][19246]	3 Cascades	Garibaldi	Garibaldi	16	6	N Cascades	CASCADES / HIGH CASCADES / BRITISH COLUMBIA / MOUNT GARIBALDI VOLCANIC FIELD	SALAL GLACIER, THE ELEPHANT	50.77	50.77	-123.39	-123.39	SAE			s_SG16 [7175]	BASALT [7175] / BASALT, ALKALINE [19246]	Quaternary									VOL			F		WR [7175]	46.59	2.04		14.35				11.52	8.56	10.59	0.18		0.97	3.48	0.43
CASCADES 38.8-1.9.csv	[7175][19246]	3 Cascades	Garibaldi	Garibaldi	16	6	N Cascades	CASCADES / HIGH CASCADES / BRITISH COLUMBIA / MOUNT GARIBALDI VOLCANIC FIELD	ELAHO VALLEY	50.52	50.52	-123.58	-123.58	SAE			s_EV01-1 [7175]	BASALT [7175] / BASALT, TRANSITIONAL [19246]	Quaternary									VOL			F		WR [7175]	50.12	1.74		16.6				9.91	9.21	6.19	0.16		0.77	3.85	0.35
CASCADES 38.8-1.9.csv	[7175][19246]	3 Cascades	Garibaldi	Garibaldi	16	6	N Cascades	CASCADES / HIGH CASCADES / BRITISH COLUMBIA / MOUNT GARIBALDI VOLCANIC FIELD	ELAHO VALLEY	50.52	50.52	-123.58	-123.58	SAE			s_EV01-2 [7175]	BASALT [7175] / BASALT, TRANSITIONAL [19246]	Quaternary									VOL			F		WR [7175]	50.18	1.67		16.95				9.76	9.15	6.29	0.16		0.75	3.66	0.33
CASCADES 38.8-1.9.csv	[7175][19246]	3 Cascades	Garibaldi	Garibaldi	16	6	N Cascades	CASCADES / HIGH CASCADES / BRITISH COLUMBIA / MOUNT GARIBALDI VOLCANIC FIELD	CHEAKAMUS VALLEY	50.04	50.04	-123.12	-123.12	SAE			s_MG11-8 [7175]	BASALT [7175] / BASALT, TRANSITIONAL [19246]	Quaternary									VOL			F		WR [7175]	49.31	1.64		16.71				11.14	9	6.45	0.2		0.56	3.5	0.25
CASCADES 38.8-1.9.csv	[7175][19246]	3 Cascades	Garibaldi	Garibaldi	16	6	N Cascades	CASCADES / HIGH CASCADES / BRITISH COLUMBIA / MOUNT GARIBALDI VOLCANIC FIELD	CHEAKAMUS VALLEY	50.04	50.04	-123.12	-123.12	SAE			s_MG71-1 [7175]	BASALT [7175] / BASALT, TRANSITIONAL [19246]	Quaternary									VOL			F		WR [7175]	49.09	1.5		15.78				10.68	8.84	7.7	0.17		0.6	4.21	0.25
CASCADES 38.8-1.9.csv	[7175]	3 Cascades	Garibaldi	Garibaldi	16	6	N Cascades	CASCADES / HIGH CASCADES / BRITISH COLUMBIA / MOUNT GARIBALDI VOLCANIC FIELD	CHEAKAMUS VALLEY	49.97	49.97	-123.15	-123.15	SAE			s_MG36-4 [7175]	BASALT [7175]	Quaternary									VOL			F		WR [7175]	48.73	1.61		16.71				11.54	8.94	6.72	0.2		0.48	3.56	0.23
CASCADES 38.8-1.9.csv	[7175][19246]	3 Cascades	Garibaldi	Garibaldi	16	6	N Cascades	CASCADES / HIGH CASCADES / BRITISH COLUMBIA / MOUNT GARIBALDI VOLCANIC FIELD	CHEAKAMUS VALLEY	49.98	49.98	-123.14	-123.14	SAE			s_MG28-4 [7175]	BASALT [7175] / BASALT, TRANSITIONAL [19246]	Quaternary									VOL			F		WR [7175]	49.45	1.64		16.8				11.09	8.88	6.35	0.2		0.56	3.54	0.25
CASCADES 38.8-1.9.csv	[7175][19246]	3 Cascades	Garibaldi	Garibaldi	16	6	N Cascades	CASCADES / HIGH CASCADES / BRITISH COLUMBIA / MOUNT GARIBALDI VOLCANIC FIELD	CHEAKAMUS VALLEY	50.04	50.04	-123.11	-123.11	SAE			s_MG198-1 [7175]	BASALT [7175] / BASALT, TRANSITIONAL [19246]	Quaternary									VOL			F		WR [7175]	50.06	1.56		16.68				10.54	8.63	6.68	0.19		0.59	3.65	0.26
CASCADES 38.8-1.9.csv	[7175][19246]	3 Cascades	Garibaldi	Garibaldi	16	6	N Cascades	CASCADES / HIGH CASCADES / BRITISH COLUMBIA / MOUNT GARIBALDI VOLCANIC FIELD	CHEAKAMUS VALLEY	50.22	50.22	-123.17	-123.17	SAE			s_MG435 [7175]	BASALT [7175] / BASALT, TRANSITIONAL [19246]	Quaternary									VOL			F		WR [7175]	51.54	1.5		17.02				9.69	8.46	6.02	0.15		0.61	3.66	0.27
CASCADES 38.8-1.9.csv	[19246]	3 Cascades	Garibaldi	Garibaldi	16	6	N Cascades	CASCADES / HIGH CASCADES / BRITISH COLUMBIA / MOUNT GARIBALDI VOLCANIC FIELD	SALAL GLACIER, NW VOLCANIC REMNANT	50.81	50.81	-123.45	-123.45	SAE			s_SG01-1 [19246]	HAWAIITE [19246]	Quaternary									VOL					WR [19246]	46.38	2.16		16.01				11.07	9.87	7.48	0.17		1.24	3.91	0.48
CASCADES 38.8-1.9.csv	[19246]	3 Cascades	Garibaldi	Garibaldi	16	6	N Cascades	CASCADES / HIGH CASCADES / BRITISH COLUMBIA / MOUNT GARIBALDI VOLCANIC FIELD	CHEAKAMUS VALLEY	50.15	50.15	-123.09	-123.09	SAE			s_126-41 [19246]	BASALT, TRANSITIONAL [19246]	Quaternary									VOL					WR [19246]	50.4	1.33		15.92	0.04			10.51	8.63	7.39	0.156		0.53	3.32	0.24
CASCADES 38.8-1.9.csv	[19246][18091]	3 Cascades	Baker	Baker	17	6	N Cascades	CASCADES / HIGH CASCADES / WASHINGTON / MOUNT BAKER	TARN PLATEAU, ABOUT 7 KM S OF MOUNT BAKER SUMMIT	48.7154	48.7154	-121.847	-121.847	SAE			s_02-MB-5 [19246]	BASALT, CALC-ALKALINE [19246] / ANDESITE, BASALTIC [18091]	Quaternary									VOL					WR [19246]	53.37	0.92		16.47	0.03			7.09	9.51	7.61	0.131		0.87	2.91	0.19
CASCADES 38.8-1.9.csv	[19246][18091]	3 Cascades	Baker	Baker	17	6	N Cascades	CASCADES / HIGH CASCADES / WASHINGTON / MOUNT BAKER	PARK BUTTE, 7 KM SSW OF MOUNT BAKER SUMMIT	48.7151	48.7151	-121.852	-121.852	SAE			s_06-MB-82 [19246]	THOLEIITE, OLIVINE [19246] / BASALT [18091]	Quaternary									VOL					WR [19246]	50.05	1.04		17.57	0.04			9.31	9.25	8.13	0.158		0.42	3.23	0.15
CASCADES 38.8-1.9.csv	[19246][18091]	3 Cascades	Baker	Baker	17	6	N Cascades	CASCADES / HIGH CASCADES / WASHINGTON / MOUNT BAKER	LAKE SHANNON	48.6385	48.6385	-121.735	-121.735	SAE			s_08-MB-114 [19246]	BASALT, CALC-ALKALINE [19246] / BASALT [18091]	Quaternary									VOL					WR [19246]	51.02	1.32		17.72	0.03			8.22	8.53	6.71	0.143		0.61	4.05	0.26
CASCADES 38.8-1.9.csv	[19246][18091]	3 Cascades	Baker	Baker	17	6	N Cascades	CASCADES / HIGH CASCADES / WASHINGTON / MOUNT BAKER	LAKE SHANNON	48.6366	48.6366	-121.73	-121.73	SAE			s_08-MB-122 [19246]	BASALT, CALC-ALKALINE [19246] / ANDESITE, BASALTIC [18091]	Quaternary									VOL					WR [19246]	52.6234	1.27957		17.6355				7.88	8.32306	7.56974	0.14732		0.70389	3.78048	0.22788
CASCADES 38.8-1.9.csv	[7175]	3 Cascades	Baker	Baker	17	6	N Cascades	CASCADES / HIGH CASCADES / WASHINGTON / MOUNT BAKER		48.67	48.67	-121.74	-121.74	SAE			s_LIB-21 [7175]	BASALT [7175]	Quaternary									VOL			F		WR [7175]	51.04	1.04		18.83				7.27	10.03	6.02	0.14		0.92	3.48	0.43
CASCADES 38.8-1.9.csv	[15956]	3 Cascades	Baker	Baker	17	6	N Cascades	CASCADES / HIGH CASCADES / WASHINGTON / MOUNT BAKER	PARK BUTTE	48.7163	48.7163	-121.853	-121.853	SAE			s_NM-PB2 [15956]	BASALT [15956]	<Pleistocene								PORPHYRITIC [15956]	VOL					WR [15956]	49.45	1.064		17.3				9.66	9.17	8.14	0.168		0.45	3.21	0.15
CASCADES 38.8-1.9.csv	[15956]	3 Cascades	Baker	Baker	17	6	N Cascades	CASCADES / HIGH CASCADES / WASHINGTON / MOUNT BAKER	PARK BUTTE	48.716	48.716	-121.851	-121.851	SAE			s_NM-PB5 [15956]	BASALT [15956]	<Pleistocene								PORPHYRITIC [15956]	VOL					WR [15956]	49.91	1.063		16.93				9.15	9.19	8.16	0.166		0.45	3.16	0.16
CASCADES 38.8-1.9.csv	[15956]	3 Cascades	Baker	Baker	17	6	N Cascades	CASCADES / HIGH CASCADES / WASHINGTON / MOUNT BAKER	PARK BUTTE	48.7155	48.7155	-121.852	-121.852	SAE			s_NM-PB6 [15956]	BASALT [15956]	<Pleistocene								PORPHYRITIC [15956]	VOL					WR [15956]	50.05	1.041		17.1				9.39	9.21	8.38	0.165		0.44	3.23	0.155
CASCADES 38.8-1.9.csv	[15956]	3 Cascades	Baker	Baker	17	6	N Cascades	CASCADES / HIGH CASCADES / WASHINGTON / MOUNT BAKER	PARK BUTTE	48.7151	48.7151	-121.852	-121.852	SAE			s_NM-PB8 [15956]	BASALT [15956]	<Pleistocene								PORPHYRITIC [15956]	VOL					WR [15956]	49.59	1.013		17.32				8.9	9.29	8.18	0.161		0.42	3.2	0.149
CASCADES 38.8-1.9.csv	[15956]	3 Cascades	Baker	Baker	17	6	N Cascades	CASCADES / HIGH CASCADES / WASHINGTON / MOUNT BAKER	TARN PLATEAU	48.7148	48.7148	-121.848	-121.848	SAE			s_NM-TP2 [15956]	ANDESITE, BASALTIC [15956]	<Pleistocene								STONGLY PORPHYRITIC [15956]	VOL					WR [15956]	53.97	0.919		16.17				6.92	9.47	7.35	0.129		0.95	2.89	0.184
CASCADES 38.8-1.9.csv	[15956]	3 Cascades	Baker	Baker	17	6	N Cascades	CASCADES / HIGH CASCADES / WASHINGTON / MOUNT BAKER	TARN PLATEAU	48.7159	48.7159	-121.847	-121.847	SAE			s_NM-TP3 [15956]	ANDESITE, BASALTIC [15956]	<Pleistocene								STONGLY PORPHYRITIC [15956]	VOL					WR [15956]	53.6	0.905		15.84				7.02	9.76	7.79	0.134		0.86	2.8	0.178
CASCADES 38.8-1.9.csv	[15956]	3 Cascades	Baker	Baker	17	6	N Cascades	CASCADES / HIGH CASCADES / WASHINGTON / MOUNT BAKER	TARN PLATEAU	48.7169	48.7169	-121.849	-121.849	SAE			s_NM-TP4 [15956]	ANDESITE, BASALTIC [15956]	<Pleistocene								STONGLY PORPHYRITIC [15956]	VOL					WR [15956]	53.9	0.922		16.15				6.95	9.41	7.03	0.131		0.95	2.94	0.184
CASCADES 38.8-1.9.csv	[15956]	3 Cascades	Baker	Baker	17	6	N Cascades	CASCADES / HIGH CASCADES / WASHINGTON / MOUNT BAKER	LAKE SHANNON	48.719	48.719	-121.845	-121.845	SAE			s_NM-TP6 [15956]	ANDESITE, BASALTIC [15956]	<Pleistocene								PORPHYRITIC [15956]	VOL					WR [15956]	53.9	0.895		15.74				6.94	9.66	7.88	0.132		0.91	2.83	0.176
CASCADES 38.8-1.9.csv	[15956]	3 Cascades	Baker	Baker	17	6	N Cascades	CASCADES / HIGH CASCADES / WASHINGTON / MOUNT BAKER	LAKE SHANNON	48.6377	48.6377	-121.736	-121.736	SAE			s_NM-LS1 [15956]	BASALT [15956]	<Pleistocene								PORPHYRITIC [15956]	VOL					WR [15956]	51.31	1.463		17.76				8.5	8.84	6.36	0.157		0.64	4.08	0.281
CASCADES 38.8-1.9.csv	[15956]	3 Cascades	Baker	Baker	17	6	N Cascades	CASCADES / HIGH CASCADES / WASHINGTON / MOUNT BAKER	SULPHUR CREEK	48.6368	48.6368	-121.732	-121.732	SAE			s_NM-LS6 [15956]	BASALT [15956]	<Pleistocene								PORPHYRITIC [15956]	VOL					WR [15956]	50.7	1.42		17.91				8.33	8.81	6.42	0.155		0.55	3.91	0.273
CASCADES 38.8-1.9.csv	[20973]	3 Cascades	Glacier Peak	Glacier Peak	18	6	N Cascades	CASCADES / HIGH CASCADES / WASHINGTON / GLACIER PEAK	LIGHTNING CREEK	47.93	47.93	-121.26	-121.26	SAE			s_LC-6H [20973]	ANDESITE, BASALTIC [20973]	Quaternary									VOL					WR [20973]	55.6108	0.94199		16.3637				5.93253	7.71683	6.23142	0.10817		1.13058	3.58428	0.22941
CASCADES 38.8-1.9.csv	[20973]	3 Cascades	Glacier Peak	Glacier Peak	18	6	N Cascades	CASCADES / HIGH CASCADES / WASHINGTON / GLACIER PEAK	LIGHTNING CREEK	47.93	47.93	-121.26	-121.26	SAE			s_LC-6M [20973]	ANDESITE, BASALTIC [20973]	Quaternary									VOL					WR [20973]	54.5718	1.1526		16.3981				6.72664	8.82169	7.7443	0.119062		0.805846	3.41879	0.275827
CASCADES 38.8-1.9.csv	[7175]	3 Cascades	Glacier Peak	Glacier Peak	18	6	N Cascades	CASCADES / HIGH CASCADES / WASHINGTON / GLACIER PEAK	DISHPAN GAP	47.98	47.98	-121.15	-121.15	SAE			s_DG-01B [7175]	BASALT [7175]	Quaternary									VOL			F		WR [7175]	53.87	1.08		17.71				7.06	8.27	6.26	0.13		0.94	3.7	0.19
CASCADES 38.8-1.9.csv	[7175][19246]	3 Cascades	Glacier Peak	Glacier Peak	18	6	N Cascades	CASCADES / HIGH CASCADES / WASHINGTON / GLACIER PEAK	DISHPAN GAP	47.98	47.98	-121.15	-121.15	SAE			s_DG-02-1 [7175]	BASALT [7175] / BASALT, CALC-ALKALINE [19246]	Quaternary									VOL			F		WR [7175]	52.62	1.12		17.78				7.38	8.79	6.8	0.14		0.81	3.55	0.19
CASCADES 38.8-1.9.csv	[7175][19246]	3 Cascades	Glacier Peak	Glacier Peak	18	6	N Cascades	CASCADES / HIGH CASCADES / WASHINGTON / GLACIER PEAK	DISHPAN GAP	47.98	47.98	-121.15	-121.15	SAE			s_DG-03-1 [7175]	BASALT [7175] / BASALT, CALC-ALKALINE [19246]	Quaternary									VOL			F		WR [7175]	50.49	1.16		17.29				7.84	9.66	7.94	0.15		0.96	3.44	0.2
CASCADES 38.8-1.9.csv	[7175][19246]	3 Cascades	Glacier Peak	Glacier Peak	18	6	N Cascades	CASCADES / HIGH CASCADES / WASHINGTON / GLACIER PEAK	DISHPAN GAP	47.98	47.98	-121.15	-121.15	SAE			s_DG-04 [7175]	BASALT [7175] / BASALT, CALC-ALKALINE [19246]	Quaternary									VOL			F		WR [7175]	51.57	1.18		17.48				7.79	9.13	7.23	0.15		0.85	3.54	0.2
CASCADES 38.8-1.9.csv	[7175][19246]	3 Cascades	Glacier Peak	Glacier Peak	18	6	N Cascades	CASCADES / HIGH CASCADES / WASHINGTON / GLACIER PEAK		48	48	-121.12	-121.12	SAE			s_IP01-2 [7175]	BASALT [7175] / BASALT, CALC-ALKALINE [19246]	Quaternary									VOL			F		WR [7175]	50.37	1.2		16.79				7.75	8.82	8.99	0.14		0.85	3.82	0.4
CASCADES 38.8-1.9.csv	[7175][19246]	3 Cascades	Glacier Peak	Glacier Peak	18	6	N Cascades	CASCADES / HIGH CASCADES / WASHINGTON / GLACIER PEAK		48.05	48.05	-121.16	-121.16	SAE			s_WC01-3 [7175]	BASALT [7175] / THOLEIITE, OLIVINE [19246]	Quaternary									VOL			F		WR [7175]	49.79	1.1		17.93				8.36	9.94	7.63	0.17		0.44	3.53	0.17
CASCADES 38.8-1.9.csv	[7175][19246]	3 Cascades	Glacier Peak	Glacier Peak	18	6	N Cascades	CASCADES / HIGH CASCADES / WASHINGTON / GLACIER PEAK		48.05	48.05	-121.16	-121.16	SAE			s_WC01-5 [7175]	BASALT [7175] / THOLEIITE, OLIVINE [19246]	Quaternary									VOL			F		WR [7175]	50.2	1.07		18.79				8.04	9.48	7.46	0.16		0.41	3.32	0.17
CASCADES 38.8-1.9.csv	[18114]	3 Cascades	Rainier	Rainier	19	7	C Cascades	CASCADES / HIGH CASCADES / WASHINGTON / MOUNT RAINIER		47.8233	47.8233	-122.667	-122.667	SAE			s_96RE532 [18114]	ANDESITE, BASALTIC [18114]	Quaternary				QUATERNARY [18114]					VOL					WR [18114]	52.74	1.39		17.11				8.41	8.34	7.54	0.15		0.45	3.55	0.33
CASCADES 38.8-1.9.csv	[18114]	3 Cascades	Rainier	Rainier	19	7	C Cascades	CASCADES / HIGH CASCADES / WASHINGTON / MOUNT RAINIER		46.7943	46.7943	-121.743	-121.743	SAE			s_93RE191 [18114]	ANDESITE, BASALTIC [18114]	Quaternary				QUATERNARY [18114]					VOL					WR [18114]	55.48	0.93		15.69				7.99	7.93	8.26	0.15		0.69	2.7	0.18
CASCADES 38.8-1.9.csv	[18114]	3 Cascades	Rainier	Rainier	19	7	C Cascades	CASCADES / HIGH CASCADES / WASHINGTON / MOUNT RAINIER		46.8901	46.8901	-121.778	-121.778	SAE			s_94ML314 [18114]	ANDESITE, BASALTIC [18114]	Quaternary				QUATERNARY [18114]					VOL					WR [18114]	56.87	1.18		16.65				6.27	7.79	6.32	0.12		1.42	3.22	0.15
CASCADES 38.8-1.9.csv	[18114]	3 Cascades	Rainier	Rainier	19	7	C Cascades	CASCADES / HIGH CASCADES / WASHINGTON / MOUNT RAINIER		46.9125	46.9125	-121.806	-121.806	SAE			s_99ML762 [18114]	ANDESITE, BASALTIC [18114]	Quaternary				QUATERNARY [18114]					VOL					WR [18114]	55.05	1.06		16.7				6.95	8.59	6.46	0.12		1.32	3.39	0.37
CASCADES 38.8-1.9.csv	[18114]	3 Cascades	Rainier	Rainier	19	7	C Cascades	CASCADES / HIGH CASCADES / WASHINGTON / MOUNT RAINIER		46.9034	46.9034	-121.808	-121.808	SAE			s_93ML214 [18114]	ANDESITE, BASALTIC [18114]	Quaternary				QUATERNARY [18114]					VOL					WR [18114]	55.24	1.19		17.37				7.43	7.52	6.06	0.13		1	3.75	0.3
CASCADES 38.8-1.9.csv	[18114]	3 Cascades	Rainier	Rainier	19	7	C Cascades	CASCADES / HIGH CASCADES / WASHINGTON / MOUNT RAINIER		46.6876	46.6876	-121.541	-121.541	SAE			s_00OHS831 [18114]	BASALT [18114]	Quaternary				QUATERNARY [18114]					VOL					WR [18114]	50.7	1.45		16.09				9.01	8.84	9.3	0.15		1	3.03	0.44
CASCADES 38.8-1.9.csv	[18114]	3 Cascades	Rainier	Rainier	19	7	C Cascades	CASCADES / HIGH CASCADES / WASHINGTON / MOUNT RAINIER		46.6887	46.6887	-121.467	-121.467	SAE			s_00WP830 [18114]	BASALT [18114]	Quaternary				QUATERNARY [18114]					VOL					WR [18114]	50.92	1.28		16.8				9.42	9.62	7.85	0.16		0.57	3.15	0.23
CASCADES 38.8-1.9.csv	[18114]	3 Cascades	Rainier	Rainier	19	7	C Cascades	CASCADES / HIGH CASCADES / WASHINGTON / MOUNT RAINIER		47.0917	47.0917	-121.852	-121.852	SAE			s_97BM664 [18114]	ANDESITE, BASALTIC [18114]	Quaternary				QUATERNARY [18114]					VOL					WR [18114]	53.51	1.13		15.64				7.67	8.04	8.94	0.13		1.3	3.3	0.34
CASCADES 38.8-1.9.csv	[18114]	3 Cascades	Rainier	St Helens	20	7	C Cascades	CASCADES / HIGH CASCADES / WASHINGTON / MOUNT RAINIER		46.2292	46.2292	-121.993	-121.993	SAE			s_01SB872 [18114]	BASALT [18114]	Quaternary				QUATERNARY [18114]					VOL					WR [18114]	49.87	1.25		17.02				9.28	10.01	8.67	0.16		0.49	3.02	0.22
CASCADES 38.8-1.9.csv	[22652]	3 Cascades	St Helens	St Helens	20	7	C Cascades	CASCADES / HIGH CASCADES / WASHINGTON / MOUNT ST. HELENS / CASTLE CREEK FLOWS	CASTLE CREEK	46.2278	46.2278	-122.171	-122.171	SAE			s_MW13-28 [22652]	BASALT [22652]	Quaternary				QUATERNARY [22652]					VOL					WR [22652]	51.33	1.67		16.96	0.025			8.68	8.49	6.56	0.14	0.013	1.1	3.93	0.35
CASCADES 38.8-1.9.csv	[22652]	3 Cascades	St Helens	St Helens	20	7	C Cascades	CASCADES / HIGH CASCADES / WASHINGTON / MOUNT ST. HELENS / CASTLE CREEK FLOWS	CASTLE CREEK	46.2286	46.2286	-122.172	-122.172	SAE			s_MW13-30 [22652]	BASALT [22652]	Quaternary				QUATERNARY [22652]					VOL					WR [22652]	51.27	1.67		17.03	0.025			8.67	8.52	6.49	0.14	0.012	1.1	3.94	0.35
CASCADES 38.8-1.9.csv	[22652]	3 Cascades	St Helens	St Helens	20	7	C Cascades	CASCADES / HIGH CASCADES / WASHINGTON / MOUNT ST. HELENS / CASTLE CREEK FLOWS	CASTLE CREEK	46.2153	46.2153	-122.233	-122.233	SAE			s_MW14-11 [22652]	BASALT [22652]	Quaternary				QUATERNARY [22652]					VOL					WR [22652]	51.33	1.73		16.72	0.029			9.04	8.28	6.72	0.14	0.014	0.99	3.78	0.35
CASCADES 38.8-1.9.csv	[22652]	3 Cascades	St Helens	St Helens	20	7	C Cascades	CASCADES / HIGH CASCADES / WASHINGTON / MOUNT ST. HELENS / CASTLE CREEK FLOWS	CASTLE CREEK	46.2219	46.2219	-122.19	-122.19	SAE			s_MW14-8 [22652]	BASALT [22652]	Quaternary				QUATERNARY [22652]					VOL					WR [22652]	51.29	1.74		16.83	0.031			8.93	8.38	7.05	0.14	0.016	1	3.78	0.36
CASCADES 38.8-1.9.csv	[22652]	3 Cascades	St Helens	St Helens	20	7	C Cascades	CASCADES / HIGH CASCADES / WASHINGTON / MOUNT ST. HELENS / CASTLE CREEK FLOWS	BU3 TEPHRA	46.2186	46.2186	-122.157	-122.157	SAE			s_MW13-45 [22652]	BASALT [22652]	Quaternary				QUATERNARY [22652]					VOL					WR [22652]	50.96	1.76		17.21	0.028			9.17	7.89	6.37	0.14	0.014	0.95	3.6	0.37
CASCADES 38.8-1.9.csv	[22652]	3 Cascades	St Helens	St Helens	20	7	C Cascades	CASCADES / HIGH CASCADES / WASHINGTON / MOUNT ST. HELENS / CASTLE CREEK FLOWS	NORTH FLANK	46.2228	46.2228	-122.165	-122.165	SAE			s_MW13-24A [22652]	BASALT [22652]	Quaternary				QUATERNARY [22652]					VOL					WR [22652]	49.52	1.93		16.76	0.025			9.17	9.06	7.21	0.15	0.014	1.28	3.68	0.4
CASCADES 38.8-1.9.csv	[22652]	3 Cascades	St Helens	St Helens	20	7	C Cascades	CASCADES / HIGH CASCADES / WASHINGTON / MOUNT ST. HELENS / CASTLE CREEK FLOWS	NORTH FLANK	46.2228	46.2228	-122.165	-122.165	SAE			s_MW13-24B [22652]	BASALT [22652]	Quaternary				QUATERNARY [22652]					VOL					WR [22652]	49.54	2.04		16.44	0.023			9.3	8.96	6.99	0.16	0.013	1.37	3.79	0.43
CASCADES 38.8-1.9.csv	[22652]	3 Cascades	St Helens	St Helens	20	7	C Cascades	CASCADES / HIGH CASCADES / WASHINGTON / MOUNT ST. HELENS / CASTLE CREEK FLOWS	NORTH FLANK	46.2228	46.2228	-122.165	-122.165	SAE			s_MW13-25 [22652]	BASALT [22652]	Quaternary				QUATERNARY [22652]					VOL					WR [22652]	49.59	2.02		16.62	0.03			9.02	9.09	7.26	0.15	0.013	1.33	3.74	0.46
CASCADES 38.8-1.9.csv	[22652]	3 Cascades	St Helens	St Helens	20	7	C Cascades	CASCADES / HIGH CASCADES / WASHINGTON / MOUNT ST. HELENS / CASTLE CREEK FLOWS	NORTH FLANK	46.2228	46.2228	-122.165	-122.165	SAE			s_MW13-27 [22652]	BASALT [22652]	Quaternary				QUATERNARY [22652]					VOL					WR [22652]	49.42	2.02		16.44	0.023			9.4	8.96	7.07	0.16	0.014	1.34	3.8	0.42
CASCADES 38.8-1.9.csv	[22652]	3 Cascades	St Helens	St Helens	20	7	C Cascades	CASCADES / HIGH CASCADES / WASHINGTON / MOUNT ST. HELENS / CASTLE CREEK FLOWS	NORTH FLANK	46.2278	46.2278	-122.171	-122.171	SAE			s_MW13-29 [22652]	BASALT [22652]	Quaternary				QUATERNARY [22652]					VOL					WR [22652]	49.51	2.08		16.54	0.027			9.11	9.04	7.12	0.15	0.014	1.42	3.82	0.47
CASCADES 38.8-1.9.csv	[22652]	3 Cascades	St Helens	St Helens	20	7	C Cascades	CASCADES / HIGH CASCADES / WASHINGTON / MOUNT ST. HELENS / CASTLE CREEK FLOWS	BU2 TEPHRA	46.234	46.234	-122.153	-122.153	SAE			s_MW13-12 [22652]	BASALT [22652]	Quaternary				QUATERNARY [22652]					VOL					WR [22652]	48.05	2.1		17.6	0.024			9.42	8.27	6.2	0.15	0.012	1.22	3.53	0.47
CASCADES 38.8-1.9.csv	[22652]	3 Cascades	St Helens	St Helens	20	7	C Cascades	CASCADES / HIGH CASCADES / WASHINGTON / MOUNT ST. HELENS / CASTLE CREEK FLOWS	BU2 TEPHRA	46.2186	46.2186	-122.157	-122.157	SAE			s_MW13-44 [22652]	BASALT [22652]	Quaternary				QUATERNARY [22652]					VOL					WR [22652]	48.97	2.09		17.1	0.025			9.45	8.46	6.77	0.15	0.013	1.28	3.59	0.46
CASCADES 38.8-1.9.csv	[22652]	3 Cascades	St Helens	St Helens	20	7	C Cascades	CASCADES / HIGH CASCADES / WASHINGTON / MOUNT ST. HELENS / CASTLE CREEK FLOWS	BU2 TEPHRA	46.2186	46.2186	-122.157	-122.157	SAE			s_MW13-46 [22652]	BASALT [22652]	Quaternary				QUATERNARY [22652]					VOL					WR [22652]	49.4	1.96		17.2	0.03			9.25	8.34	6.86	0.14	0.014	1.12	3.56	0.43
CASCADES 38.8-1.9.csv	[22652]	3 Cascades	St Helens	St Helens	20	7	C Cascades	CASCADES / HIGH CASCADES / WASHINGTON / MOUNT ST. HELENS / CASTLE CREEK FLOWS	CAVE BASALT	46.0577	46.0577	-122.256	-122.256	SAE			s_MW13-1A [22652]	BASALT [22652]	Quaternary				QUATERNARY [22652]					VOL					WR [22652]	49.88	1.45		17.17	0.023			9.91	9.81	7	0.16	0.011	0.49	3.36	0.17
CASCADES 38.8-1.9.csv	[22652]	3 Cascades	St Helens	St Helens	20	7	C Cascades	CASCADES / HIGH CASCADES / WASHINGTON / MOUNT ST. HELENS / CASTLE CREEK FLOWS	CAVE BASALT	46.0577	46.0577	-122.256	-122.256	SAE			s_MW13-1B [22652]	BASALT [22652]	Quaternary				QUATERNARY [22652]					VOL					WR [22652]	49.94	1.39		17.28	0.023			9.73	9.76	7.05	0.16	0.012	0.49	3.34	0.17
CASCADES 38.8-1.9.csv	[22652]	3 Cascades	St Helens	St Helens	20	7	C Cascades	CASCADES / HIGH CASCADES / WASHINGTON / MOUNT ST. HELENS / CASTLE CREEK FLOWS	CAVE BASALT	46.0577	46.0577	-122.256	-122.256	SAE			s_MW13-1C [22652]	BASALT [22652]	Quaternary				QUATERNARY [22652]					VOL					WR [22652]	49.99	1.4		17.27	0.023			9.77	9.76	7.08	0.16	0.012	0.49	3.37	0.17
CASCADES 38.8-1.9.csv	[22652]	3 Cascades	St Helens	St Helens	20	7	C Cascades	CASCADES / HIGH CASCADES / WASHINGTON / MOUNT ST. HELENS / CASTLE CREEK FLOWS	CAVE BASALT	46.1137	46.1137	-122.329	-122.329	SAE			s_MW14-57 [22652]	BASALT [22652]	Quaternary				QUATERNARY [22652]					VOL					WR [22652]	50.39	1.61		16.88	0.023			10.15	9.67	6.09	0.17	0.01	0.61	3.44	0.21
CASCADES 38.8-1.9.csv	[22652]	3 Cascades	St Helens	St Helens	20	7	C Cascades	CASCADES / HIGH CASCADES / WASHINGTON / MOUNT ST. HELENS / CASTLE CREEK FLOWS	PRE-CAVE BASALT	46.1436	46.1436	-122.202	-122.202	SAE			s_MW13-33 [22652]	ANDESITE, BASALTIC [22652]	Quaternary				QUATERNARY [22652]					VOL					WR [22652]	52.95	1.58		16.25	0.026			8.78	7.77	6.18	0.14	0.015	1.04	3.85	0.32
CASCADES 38.8-1.9.csv	[22652]	3 Cascades	St Helens	St Helens	20	7	C Cascades	CASCADES / HIGH CASCADES / WASHINGTON / MOUNT ST. HELENS / CASTLE CREEK FLOWS	PRE-CAVE BASALT	46.1436	46.1436	-122.202	-122.202	SAE			s_MW13-33C [22652]	ANDESITE, BASALTIC [22652]	Quaternary				QUATERNARY [22652]					VOL					WR [22652]	53.08	1.58		16.28	0.026			8.8	7.78	6.17	0.14	0.015	1.04	3.85	0.32
CASCADES 38.8-1.9.csv	[22652]	3 Cascades	St Helens	St Helens	20	7	C Cascades	CASCADES / HIGH CASCADES / WASHINGTON / MOUNT ST. HELENS / CASTLE CREEK FLOWS	BU1 TEPHRA	46.1437	46.1437	-122.202	-122.202	SAE			s_MW14-16 [22652]	BASALT [22652]	Quaternary				QUATERNARY [22652]					VOL					WR [22652]	51.09	1.6		17.06	0.021			9.77	9.51	6.07	0.16	0.009	0.68	3.55	0.22
CASCADES 38.8-1.9.csv	[22652]	3 Cascades	St Helens	St Helens	20	7	C Cascades	CASCADES / HIGH CASCADES / WASHINGTON / MOUNT ST. HELENS / CASTLE CREEK FLOWS	SOTUH FLANK	46.1486	46.1486	-122.216	-122.216	SAE			s_MW14-23 [22652]	BASALT [22652]	Quaternary				QUATERNARY [22652]					VOL					WR [22652]	51.28	1.73		16.42	0.027			9.15	8.43	6.89	0.15	0.015	1.02	3.61	0.32
CASCADES 38.8-1.9.csv	[22656]	3 Cascades	St Helens	St Helens	20	7	C Cascades	CASCADES / HIGH CASCADES / WASHINGTON / MOUNT ST. HELENS	CASTLE CREEK	46.2278	46.2278	-122.171	-122.171	SAE			s_MW13-28 [22656]	BASALT [22656]	<0.6Ma									VOL					WR [22656]	51.33	1.67		16.96	0.025			8.68	8.49	6.56	0.14	0.013	1.1	3.93	0.35
CASCADES 38.8-1.9.csv	[22656]	3 Cascades	St Helens	St Helens	20	7	C Cascades	CASCADES / HIGH CASCADES / WASHINGTON / MOUNT ST. HELENS	CASTLE CREEK	46.2286	46.2286	-122.172	-122.172	SAE			s_MW13-30 [22656]	BASALT [22656]	<0.6Ma									VOL					WR [22656]	51.27	1.67		17.03	0.025			8.67	8.52	6.49	0.14	0.012	1.1	3.94	0.35
CASCADES 38.8-1.9.csv	[22656]	3 Cascades	St Helens	St Helens	20	7	C Cascades	CASCADES / HIGH CASCADES / WASHINGTON / MOUNT ST. HELENS	CASTLE CREEK	46.2153	46.2153	-122.233	-122.233	SAE			s_MW14-11 [22656]	BASALT [22656]	<0.6Ma									VOL					WR [22656]	51.33	1.73		16.72	0.029			9.04	8.28	6.72	0.14	0.014	0.99	3.78	0.35
CASCADES 38.8-1.9.csv	[22656]	3 Cascades	St Helens	St Helens	20	7	C Cascades	CASCADES / HIGH CASCADES / WASHINGTON / MOUNT ST. HELENS	CASTLE CREEK	46.2219	46.2219	-122.19	-122.19	SAE			s_MW14-8 [22656]	BASALT [22656]	<0.6Ma									VOL					WR [22656]	51.29	1.74		16.83	0.031			8.94	8.38	7.05	0.14	0.016	1	3.78	0.36
CASCADES 38.8-1.9.csv	[22656]	3 Cascades	St Helens	St Helens	20	7	C Cascades	CASCADES / HIGH CASCADES / WASHINGTON / MOUNT ST. HELENS	CASTLE CREEK	46.2186	46.2186	-122.157	-122.157	SAE			s_MW13-45 [22656]	NOT GIVEN [22656]	<0.6Ma									VOL					WR [22656]	50.96	1.76		17.21	0.028			9.17	7.89	6.37	0.14	0.014	0.95	3.6	0.37
CASCADES 38.8-1.9.csv	[22656]	3 Cascades	St Helens	St Helens	20	7	C Cascades	CASCADES / HIGH CASCADES / WASHINGTON / MOUNT ST. HELENS	CASTLE CREEK	46.2228	46.2228	-122.165	-122.165	SAE			s_MW13-24A [22656]	BASALT [22656]	<0.6Ma									VOL					WR [22656]	49.52	1.93		16.76	0.025			9.17	9.06	7.21	0.15	0.014	1.28	3.68	0.4
CASCADES 38.8-1.9.csv	[22656]	3 Cascades	St Helens	St Helens	20	7	C Cascades	CASCADES / HIGH CASCADES / WASHINGTON / MOUNT ST. HELENS	CASTLE CREEK	46.2228	46.2228	-122.165	-122.165	SAE			s_MW13-24B [22656]	BASALT [22656]	<0.6Ma									VOL					WR [22656]	49.54	2.04		16.44	0.023			9.3	8.96	6.99	0.16	0.013	1.37	3.79	0.43
CASCADES 38.8-1.9.csv	[22656]	3 Cascades	St Helens	St Helens	20	7	C Cascades	CASCADES / HIGH CASCADES / WASHINGTON / MOUNT ST. HELENS	CASTLE CREEK	46.2228	46.2228	-122.165	-122.165	SAE			s_MW13-25 [22656]	BASALT [22656]	<0.6Ma									VOL					WR [22656]	49.59	2.02		16.62	0.03			9.03	9.09	7.26	0.15	0.013	1.33	3.74	0.46
CASCADES 38.8-1.9.csv	[22656]	3 Cascades	St Helens	St Helens	20	7	C Cascades	CASCADES / HIGH CASCADES / WASHINGTON / MOUNT ST. HELENS	CASTLE CREEK	46.2228	46.2228	-122.165	-122.165	SAE			s_MW13-27 [22656]	BASALT [22656]	<0.6Ma									VOL					WR [22656]	49.42	2.02		16.44	0.023			9.39	8.96	7.07	0.16	0.014	1.34	3.8	0.42
CASCADES 38.8-1.9.csv	[22656]	3 Cascades	St Helens	St Helens	20	7	C Cascades	CASCADES / HIGH CASCADES / WASHINGTON / MOUNT ST. HELENS	CASTLE CREEK	46.2278	46.2278	-122.171	-122.171	SAE			s_MW13-29 [22656]	BASALT [22656]	<0.6Ma									VOL					WR [22656]	49.51	2.08		16.54	0.027			9.11	9.04	7.12	0.15	0.014	1.42	3.82	0.47
CASCADES 38.8-1.9.csv	[22656]	3 Cascades	St Helens	St Helens	20	7	C Cascades	CASCADES / HIGH CASCADES / WASHINGTON / MOUNT ST. HELENS	CASTLE CREEK	46.234	46.234	-122.153	-122.153	SAE			s_MW13-12 [22656]	NOT GIVEN [22656]	<0.6Ma									VOL					WR [22656]	48.05	2.1		17.6	0.024			9.42	8.27	6.2	0.15	0.012	1.22	3.53	0.47
CASCADES 38.8-1.9.csv	[22656]	3 Cascades	St Helens	St Helens	20	7	C Cascades	CASCADES / HIGH CASCADES / WASHINGTON / MOUNT ST. HELENS	CASTLE CREEK	46.2186	46.2186	-122.157	-122.157	SAE			s_MW13-44 [22656]	NOT GIVEN [22656]	<0.6Ma									VOL					WR [22656]	48.97	2.09		17.1	0.025			9.45	8.46	6.77	0.15	0.013	1.28	3.59	0.46
CASCADES 38.8-1.9.csv	[22656]	3 Cascades	St Helens	St Helens	20	7	C Cascades	CASCADES / HIGH CASCADES / WASHINGTON / MOUNT ST. HELENS	CASTLE CREEK	46.2186	46.2186	-122.157	-122.157	SAE			s_MW13-46 [22656]	NOT GIVEN [22656]	<0.6Ma									VOL					WR [22656]	49.4	1.96		17.2	0.03			9.25	8.34	6.86	0.14	0.014	1.12	3.56	0.43
CASCADES 38.8-1.9.csv	[22656]	3 Cascades	St Helens	St Helens	20	7	C Cascades	CASCADES / HIGH CASCADES / WASHINGTON / MOUNT ST. HELENS	CASTLE CREEK	46.0577	46.0577	-122.256	-122.256	SAE			s_MW13-1A [22656]	BASALT [22656]	<0.6Ma									VOL					WR [22656]	49.88	1.45		17.17	0.023			9.92	9.81	7	0.16	0.011	0.49	3.36	0.17
CASCADES 38.8-1.9.csv	[22656]	3 Cascades	St Helens	St Helens	20	7	C Cascades	CASCADES / HIGH CASCADES / WASHINGTON / MOUNT ST. HELENS	CASTLE CREEK	46.0577	46.0577	-122.256	-122.256	SAE			s_MW13-1B [22656]	BASALT [22656]	<0.6Ma									VOL					WR [22656]	49.94	1.39		17.28	0.023			9.74	9.76	7.05	0.16	0.012	0.49	3.34	0.17
CASCADES 38.8-1.9.csv	[22656]	3 Cascades	St Helens	St Helens	20	7	C Cascades	CASCADES / HIGH CASCADES / WASHINGTON / MOUNT ST. HELENS	CASTLE CREEK	46.0577	46.0577	-122.256	-122.256	SAE			s_MW13-1C [22656]	BASALT [22656]	<0.6Ma									VOL					WR [22656]	49.99	1.4		17.27	0.023			9.77	9.76	7.08	0.16	0.012	0.49	3.37	0.17
CASCADES 38.8-1.9.csv	[22656]	3 Cascades	St Helens	St Helens	20	7	C Cascades	CASCADES / HIGH CASCADES / WASHINGTON / MOUNT ST. HELENS	CASTLE CREEK	46.1137	46.1137	-122.329	-122.329	SAE			s_MW14-57 [22656]	BASALT [22656]	<0.6Ma									VOL					WR [22656]	50.39	1.61		16.88	0.023			10.15	9.67	6.09	0.17	0.01	0.61	3.44	0.21
CASCADES 38.8-1.9.csv	[22656]	3 Cascades	St Helens	St Helens	20	7	C Cascades	CASCADES / HIGH CASCADES / WASHINGTON / MOUNT ST. HELENS	CASTLE CREEK	46.1436	46.1436	-122.202	-122.202	SAE			s_MW13-33 [22656]	BASALT [22656]	<0.6Ma									VOL					WR [22656]	52.95	1.58		16.25	0.026			8.77	7.77	6.18	0.14	0.015	1.04	3.85	0.32
CASCADES 38.8-1.9.csv	[22656]	3 Cascades	St Helens	St Helens	20	7	C Cascades	CASCADES / HIGH CASCADES / WASHINGTON / MOUNT ST. HELENS	CASTLE CREEK	46.1436	46.1436	-122.202	-122.202	SAE			s_MW13-33C [22656]	BASALT [22656]	<0.6Ma									VOL					WR [22656]	53.08	1.58		16.28	0.026			8.8	7.78	6.17	0.14	0.015	1.04	3.85	0.32
CASCADES 38.8-1.9.csv	[22656]	3 Cascades	St Helens	St Helens	20	7	C Cascades	CASCADES / HIGH CASCADES / WASHINGTON / MOUNT ST. HELENS	CASTLE CREEK	46.1437	46.1437	-122.202	-122.202	SAE			s_MW14-16 [22656]	BASALT [22656]	<0.6Ma									VOL					WR [22656]	51.09	1.6		17.06	0.021			9.77	9.51	6.07	0.16	0.009	0.68	3.55	0.22
CASCADES 38.8-1.9.csv	[22656]	3 Cascades	St Helens	St Helens	20	7	C Cascades	CASCADES / HIGH CASCADES / WASHINGTON / MOUNT ST. HELENS	CASTLE CREEK	46.1486	46.1486	-122.216	-122.216	SAE			s_MW14-23 [22656]	BASALT [22656]	<0.6Ma									VOL					WR [22656]	51.28	1.73		16.42	0.027			9.15	8.43	6.89	0.15	0.015	1.02	3.61	0.32
CASCADES 38.8-1.9.csv	[3576][7186][3755]	3 Cascades	St Helens	St Helens	20	7	C Cascades	CASCADES / HIGH CASCADES / WASHINGTON / MOUNT ST. HELENS / CASTLE CREEK FLOWS	CAVE BASALT NORTH SIDE OF NATIONAL FOREST ROAD 90, 4.8 KM WEST OF COUGAR ON N90	46.056	46.056	-122.247	-122.247	SAE			s_DS-27 [3576]	BASALT [3576] / THOLEIITE [7186]	Holocene	1700 [3576]	2200 [3576]							VOL					WR [3576]	48.56	1.47		17.47				11.67	9.58	6.57	0.16		0.56	3.65	0.15
CASCADES 38.8-1.9.csv	[18114]	3 Cascades	Rainier	Adams	21	7	C Cascades	CASCADES / HIGH CASCADES / WASHINGTON / MOUNT RAINIER		46.3392	46.3392	-121.741	-121.741	SAE			s_00ECR836 [18114]	BASALT [18114]	Quaternary				QUATERNARY [18114]					VOL					WR [18114]	49.88	1.3		16.66				8.58	9.95	8.75	0.15		1.23	3.05	0.44
CASCADES 38.8-1.9.csv	[18114]	3 Cascades	Rainier	Adams	21	7	C Cascades	CASCADES / HIGH CASCADES / WASHINGTON / MOUNT RAINIER		46.3973	46.3973	-121.728	-121.728	SAE			s_00BL834 [18114]	BASALT [18114]	Quaternary				QUATERNARY [18114]					VOL					WR [18114]	50.23	1.35		16.58				8.51	9.69	8.61	0.15		1.3	3.12	0.46
CASCADES 38.8-1.9.csv	[3755]	3 Cascades	Adams	Adams	21	7	C Cascades	CASCADES / HIGH CASCADES / WASHINGTON / MOUNT ADAMS	FLATTOP MOUNTAIN	46.206	46.206	-121.49	-121.49	SAE			s_MA434 [3755]	BASALT [3755]	Quaternary									VOL					WR [3755]	48.38	1.57		17.35				11.03	10.51	7.11	0.16		0.37	3.31	0.23
CASCADES 38.8-1.9.csv	[3755]	3 Cascades	Adams	Adams	21	7	C Cascades	CASCADES / HIGH CASCADES / WASHINGTON / MOUNT ADAMS	FLATTOP MOUNTAIN	46.206	46.206	-121.49	-121.49	SAE			s_82-26 [3755]	BASALT [3755]	Quaternary									VOL					WR [3755]	52.73	1.27		17.48				8.79	8.79	6.46	0.15		0.74	3.38	0.22
CASCADES 38.8-1.9.csv	[3755]	3 Cascades	Adams	Adams	21	7	C Cascades	CASCADES / HIGH CASCADES / WASHINGTON / MOUNT ADAMS	FLATTOP MOUNTAIN	46.206	46.206	-121.49	-121.49	SAE			s_MA20 [3755]	BASALT [3755]	Quaternary									VOL					WR [3755]	48.46	1.89		16.46				10.23	9.16	7.94	0.15		1.44	3.73	0.55
CASCADES 38.8-1.9.csv	[3755][4438]	3 Cascades	Adams	Adams	21	7	C Cascades	CASCADES / HIGH CASCADES / WASHINGTON / MOUNT ADAMS	GOAT BUTTE	46.206	46.206	-121.49	-121.49	SAE			s_MA-226 [3755]	BASALT [3755]	Quaternary				QUATERNARY [4438]					VOL					WR [3755]	50.21	1.62		16.11				10.41	9.56	7.4	0.14		1.141	3.07	0.43
CASCADES 38.8-1.9.csv	[4450][20728]	3 Cascades	Adams	Adams	21	7	C Cascades	CASCADES / HIGH CASCADES / WASHINGTON / MOUNT ADAMS		46.0606	46.0606	-121.251	-121.251	SAE			s_MA-767 [4450]	THOLEIITE, OLIVINE [4450] / BASALT, THOLEIITIC [20728]	Quaternary									VOL					WR [4450]	48.1	1.22		16.3		1.77	9.3		10.1	9.62	0.17		0.173	2.85	0.11
CASCADES 38.8-1.9.csv	[4450][20728]	3 Cascades	Adams	Adams	21	7	C Cascades	CASCADES / HIGH CASCADES / WASHINGTON / MOUNT ADAMS		46.4218	46.4218	-121.757	-121.757	SAE			s_MA-696 [4450]	THOLEIITE, OLIVINE [4450] / BASALT, THOLEIITIC [20728]	Quaternary									VOL					WR [4450]	47.5	1.39		16.9		1.96	9.31		10.5	8.85	0.18		0.16	2.85	0.16
CASCADES 38.8-1.9.csv	[4450][20728]	3 Cascades	Adams	Adams	21	7	C Cascades	CASCADES / HIGH CASCADES / WASHINGTON / MOUNT ADAMS		46.3218	46.3218	-121.5	-121.5	SAE			s_MA-120 [4450]	THOLEIITE, OLIVINE [4450] / BASALT, THOLEIITIC [20728]	Quaternary									VOL					WR [4450]	47.9	1.42		16.7		1.5	9.27		10.25	8.78	0.18		0.311	3.02	0.16
CASCADES 38.8-1.9.csv	[4450][20728]	3 Cascades	Adams	Adams	21	7	C Cascades	CASCADES / HIGH CASCADES / WASHINGTON / MOUNT ADAMS		46.3557	46.3557	-121.711	-121.711	SAE			s_MA-953 [4450]	BASALT [4450] / BASALT, CALC-ALKALINE [20728]	Quaternary									VOL					WR [4450]	49.5	1.36		15.6		2.41	6.4		9.81	9.62	0.14		1.48	3.17	0.52
CASCADES 38.8-1.9.csv	[4450][20728]	3 Cascades	Adams	Adams	21	7	C Cascades	CASCADES / HIGH CASCADES / WASHINGTON / MOUNT ADAMS		46.0356	46.0356	-121.497	-121.497	SAE			s_MA-322 [4450]	BASALT [4450] / BASALT, CALC-ALKALINE [20728]	Quaternary									VOL					WR [4450]	49	1.5		15.9		3.07	5.92		9.4	8.87	0.14		1.074	3.5	0.39
CASCADES 38.8-1.9.csv	[3755][4438]	3 Cascades	Adams	Adams	21	7	C Cascades	CASCADES / HIGH CASCADES / WASHINGTON / MOUNT ADAMS	FLATTOP MOUNTAIN	46.206	46.206	-121.49	-121.49	SAE			s_MA421 [3755] / s_MA-421 [4438]	BASALT [3755]	Quaternary				QUATERNARY [4438]					VOL					WR [3755]	49.34	1.93		15.52				10.45	9.1	8.41	0.15		1.132	3.53	0.45
CASCADES 38.8-1.9.csv	[3755][7186]	3 Cascades	Adams	Adams	21	7	C Cascades	CASCADES / HIGH CASCADES / WASHINGTON / MOUNT ADAMS		46.34	46.34	-121.622	-121.622	SAE			s_83-49 [3755] / s_L83-49 [7186]	BASALT [3755] / THOLEIITE [7186]										VOL					WR [3755]	48.95	1.52		16.82				10.69	10.4	7.89	0.17		0.33	3.04	0.17
CASCADES 38.8-1.9.csv	[12903][13454][14784]	3 Cascades	Adams	Adams	21	7	C Cascades	CASCADES / HIGH CASCADES / WASHINGTON / MOUNT ADAMS	STRATOVOLCANO	46.2025	46.2025	-121.491	-121.491	SAE			s_BPH [12903]	ANDESITE, BASALTIC [12903] / NOT GIVEN [13454]	Quaternary				QUATERNARY [12903]					VOL					WR [12903]	54	1.35		16.18				8.52	7.76	6.22	0.13		1.4	3.68	0.31
CASCADES 38.8-1.9.csv	[12903][13454][14784]	3 Cascades	Adams	Adams	21	7	C Cascades	CASCADES / HIGH CASCADES / WASHINGTON / MOUNT ADAMS	STRATOVOLCANO	46.2025	46.2025	-121.491	-121.491	SAE			s_BSC [12903]	THOLEIITE [12903] / NOT GIVEN [13454]	Quaternary				QUATERNARY [12903]					VOL					WR [12903]	48	1.42		16.72				10.89	10.25	8.78	0.18		0.3	2.92	0.16
CASCADES 38.8-1.9.csv	[12903][13454][14784]	3 Cascades	Adams	Adams	21	7	C Cascades	CASCADES / HIGH CASCADES / WASHINGTON / MOUNT ADAMS	STRATOVOLCANO, SMITH BUTTE	46.2	46.2	-121.5	-121.5	SAE			s_BSB [12903]	BASALT [12903]	Quaternary				QUATERNARY [12903]					VOL					WR [12903]	49.1	1.94		16.42				9.28	9.32	7.87	0.15		1.43	3.58	0.55
CASCADES 38.8-1.9.csv	[12903][13454][14784]	3 Cascades	Adams	Adams	21	7	C Cascades	CASCADES / HIGH CASCADES / WASHINGTON / MOUNT ADAMS	STRATOVOLCANO, RILEY CREEK	46.2	46.2	-121.5	-121.5	SAE			s_BRC [12903]	BASALT [12903]	Quaternary				QUATERNARY [12903]					VOL					WR [12903]	51.5	1.4		16.01				9.1	8.1	8.09	0.14		1.14	3.76	0.39
CASCADES 38.8-1.9.csv	[12903][13454][14784]	3 Cascades	Adams	Adams	21	7	C Cascades	CASCADES / HIGH CASCADES / WASHINGTON / MOUNT ADAMS	STRATOVOLCANO, MEADOW BUTTE	46.2	46.2	-121.5	-121.5	SAE			s_BMB [12903]	BASALT [12903]	Quaternary				QUATERNARY [12903]					VOL					WR [12903]	50.6	1.44		17.57				9.41	9.59	6.54	0.15		0.6	3.48	0.26
CASCADES 38.8-1.9.csv	[12903][14784]	3 Cascades	Adams	Adams	21	7	C Cascades	CASCADES / HIGH CASCADES / WASHINGTON / MOUNT ADAMS	STRATOVOLCANO, HERIONS BRIDGE	46.2	46.2	-121.5	-121.5	SAE			s_BHB [12903]	BASALT [12903]	Quaternary				QUATERNARY [12903]					VOL					WR [12903]	50.8	1.63		16.98				10.09	9.17	6.11	0.17		0.8	3.58	0.3
CASCADES 38.8-1.9.csv	[3755]	3 Cascades	Indian Heaven	Indian Heaven	22	7	C Cascades	CASCADES / HIGH CASCADES / WASHINGTON / INDIAN HEAVEN		46.2	46.2	-121.5	-121.5	SAE			s_DS80A [3755]	BASALT [3755]	Quaternary									VOL					WR [3755]	48.3	1.16		17.51				10.98	9.89	8.37	0.18		0.22	3.23	0.16
CASCADES 38.8-1.9.csv	[3755]	3 Cascades	Indian Heaven	Indian Heaven	22	7	C Cascades	CASCADES / HIGH CASCADES / WASHINGTON / INDIAN HEAVEN		46.2	46.2	-121.5	-121.5	SAE			s_DS9A-81 [3755]	BASALT [3755]	Quaternary									VOL					WR [3755]	49.66	1.1		17.37				9.82	9.51	8.59	0.17		0.48	3.1	0.19
CASCADES 38.8-1.9.csv	[3755]	3 Cascades	Indian Heaven	Indian Heaven	22	7	C Cascades	CASCADES / HIGH CASCADES / WASHINGTON / INDIAN HEAVEN		46.2	46.2	-121.5	-121.5	SAE			s_DS69A-80 [3755]	BASALT [3755]	Quaternary									VOL					WR [3755]	52.37	1.4		16.78				8.08	8.38	7.92	0.14		0.94	3.62	0.37
CASCADES 38.8-1.9.csv	[3755]	3 Cascades	Indian Heaven	Indian Heaven	22	7	C Cascades	CASCADES / HIGH CASCADES / WASHINGTON / INDIAN HEAVEN		46.2	46.2	-121.5	-121.5	SAE			s_DS42-81 [3755]	BASALT [3755]	Quaternary									VOL					WR [3755]	52.66	1.13		16.04				7.36	8.49	8.41	0.12		1.74	3.62	0.43
CASCADES 38.8-1.9.csv	[3755]	3 Cascades	Indian Heaven	Indian Heaven	22	7	C Cascades	CASCADES / HIGH CASCADES / WASHINGTON / INDIAN HEAVEN		46.2	46.2	-121.5	-121.5	SAE			s_DS23B-81 [3755]	BASALT [3755]	Quaternary									VOL					WR [3755]	52.21	1.32		16.88				7.65	8.85	6.02	0.13		2.19	4.18	0.57
CASCADES 38.8-1.9.csv	[4584]	3 Cascades	Jefferson	Jefferson	23	7	C Cascades	CASCADES / HIGH CASCADES / OREGON / MOUNT ST. JEFFERSON		44.692	44.692	-121.8	-121.8	SAE			s_BR-115 [4584]	BASALT [4584]	Quaternary									VOL					WR [4584]	50.27	1.55		16.38		9.42			9.38	8.48	0.15		0.7	3.36	0.31
CASCADES 38.8-1.9.csv	[4584]	3 Cascades	Jefferson	Jefferson	23	7	C Cascades	CASCADES / HIGH CASCADES / OREGON / MOUNT ST. JEFFERSON		44.692	44.692	-121.8	-121.8	SAE			s_MJ-930 [4584]	BASALT [4584]	Quaternary									VOL					WR [4584]	51.14	1.43		17.41		9.57			9.14	6.73	0.16		0.69	3.33	0.41
CASCADES 38.8-1.9.csv	[4584]	3 Cascades	Jefferson	Jefferson	23	7	C Cascades	CASCADES / HIGH CASCADES / OREGON / MOUNT ST. JEFFERSON		44.692	44.692	-121.8	-121.8	SAE			s_MJ-277F [4584]	NOT GIVEN [4584]	Quaternary									VOL					WR [4584]	53.11	0.92		18.31		7.98			8.73	7.29	0.11		0.49	2.96	0.09
CASCADES 38.8-1.9.csv	[4790]	3 Cascades	Three Sisters	Three Sisters	24	7	C Cascades	CASCADES / HIGH CASCADES / OREGON / THREE SISTERS		44.17	44.17	-121.5	-121.5	SAE			s_96PRTS1 [4790]	BASALT [4790]	Quaternary	370000 [4790]	400000 [4790]							VOL					WR [4790]	50.98	1.15		15.67				8.86	8.7	8.83	0.14		1.2	2.9	0.29
CASCADES 38.8-1.9.csv	[4790]	3 Cascades	Three Sisters	Three Sisters	24	7	C Cascades	CASCADES / HIGH CASCADES / OREGON / THREE SISTERS		44.17	44.17	-121.5	-121.5	SAE			s_96PRTS6 [4790]	BASALT [4790]	Quaternary	370000 [4790]	400000 [4790]							VOL					WR [4790]	50.56	1.09		15.55				8.42	8.33	9.57	0.14		1.02	2.82	0.28
CASCADES 38.8-1.9.csv	[4790]	3 Cascades	Three Sisters	Three Sisters	24	7	C Cascades	CASCADES / HIGH CASCADES / OREGON / THREE SISTERS		44.17	44.17	-121.5	-121.5	SAE			s_96PRTS11 [4790]	BASALT [4790]	Quaternary	370000 [4790]	400000 [4790]							VOL					WR [4790]	52.51	1.25		15.34				8.01	7.65	9.07	0.13		1.43	3.21	0.36
CASCADES 38.8-1.9.csv	[9862][11187][17166]	3 Cascades	Three Sisters	Three Sisters	24	7	C Cascades	CASCADES / HIGH CASCADES / OREGON / THREE SISTERS	CAYUSE CRATER	44.06	44.06	-121.71	-121.71	SAE			s_CC02-1 [9862]	BASALT, CALC-ALKALINE [9862]										VOL					WR [9862]	51.94	1.05		16.53				7.85	9.15	8.62	0.15		0.65	3.13	0.22
CASCADES 38.8-1.9.csv	[22162]	3 Cascades	Newberry	Newberry	25	7	C Cascades	CASCADES / HIGH CASCADES / OREGON / NEWBERRY		43.8252	43.8252	-121.358	-121.358	SAE			s_RC05-5 [22162]	THOLEIITE [22162]	Pleistocene-Holocene									VOL					WR [22162]	51.6898	1.35151		17.21				8.73322	10.0601	6.25714	0.158255		0.652491	3.61714	0.270438
CASCADES 38.8-1.9.csv	[22162]	3 Cascades	Newberry	Newberry	25	7	C Cascades	CASCADES / HIGH CASCADES / OREGON / NEWBERRY		43.9831	43.9831	-121.302	-121.302	SAE			s_RC05-10 [22162]	THOLEIITE [22162]	Pleistocene-Holocene									VOL					WR [22162]	48.7293	1.31044		17.483				9.31637	11.1731	8.46366	0.160852		0.266863	2.9355	0.160892
CASCADES 38.8-1.9.csv	[22162]	3 Cascades	Newberry	Newberry	25	7	C Cascades	CASCADES / HIGH CASCADES / OREGON / NEWBERRY		44.0367	44.0367	-121.257	-121.257	SAE			s_RC05-11 [22162]	THOLEIITE [22162]	Pleistocene-Holocene									VOL					WR [22162]	48.9999	1.49608		17.2403				9.22217	9.90311	9.03341	0.160267		0.434025	3.23431	0.276459
CASCADES 38.8-1.9.csv	[22162]	3 Cascades	Newberry	Newberry	25	7	C Cascades	CASCADES / HIGH CASCADES / OREGON / NEWBERRY		44.0549	44.0549	-121.244	-121.244	SAE			s_RC05-12V [22162]	THOLEIITE [22162]	Pleistocene-Holocene									VOL					WR [22162]	48.933	1.52703		17.4049				9.30413	10.451	8.4186	0.164686		0.336071	3.22094	0.239613
CASCADES 38.8-1.9.csv	[22162]	3 Cascades	Newberry	Newberry	25	7	C Cascades	CASCADES / HIGH CASCADES / OREGON / NEWBERRY		44.171	44.171	-121.245	-121.245	SAE			s_RC05-13 [22162]	THOLEIITE [22162]	Pleistocene-Holocene									VOL					WR [22162]	48.8268	1.48458		17.1581				9.09261	10.3589	9.077	0.15654		0.518132	3.08923	0.238177
CASCADES 38.8-1.9.csv	[22162]	3 Cascades	Newberry	Newberry	25	7	C Cascades	CASCADES / HIGH CASCADES / OREGON / NEWBERRY		43.4875	43.4875	-121.014	-121.014	SAE			s_RC06-1 [22162]	THOLEIITE [22162]	Pleistocene-Holocene									VOL					WR [22162]	48.6655	1.73204		17.3687				9.71354	9.99331	8.07896	0.168392		0.563142	3.32723	0.389145
CASCADES 38.8-1.9.csv	[22162]	3 Cascades	Newberry	Newberry	25	7	C Cascades	CASCADES / HIGH CASCADES / OREGON / NEWBERRY		43.57	43.57	-121.231	-121.231	SAE			s_RC07-3 [22162]	THOLEIITE [22162]	Pleistocene-Holocene									VOL					WR [22162]	50.845	1.27047		18.5267				8.51102	10.2212	6.38027	0.151293		0.494564	3.3691	0.230403
CASCADES 38.8-1.9.csv	[22162]	3 Cascades	Newberry	Newberry	25	7	C Cascades	CASCADES / HIGH CASCADES / OREGON / NEWBERRY		43.4541	43.4541	-121.294	-121.294	SAE			s_RC07-8 [22162]	THOLEIITE [22162]	Pleistocene-Holocene									VOL					WR [22162]	49.0746	1.51275		17.2776				9.61206	9.57734	8.93839	0.165247		0.415472	3.20324	0.223294
CASCADES 38.8-1.9.csv	[22162]	3 Cascades	Newberry	Newberry	25	7	C Cascades	CASCADES / HIGH CASCADES / OREGON / NEWBERRY		43.479	43.479	-121.414	-121.414	SAE			s_RC07-9 [22162]	THOLEIITE [22162]	Pleistocene-Holocene									VOL					WR [22162]	48.507	1.37195		17.3389				9.13489	9.71507	10.0875	0.163142		0.354055	3.10946	0.218076
CASCADES 38.8-1.9.csv	[22162]	3 Cascades	Newberry	Newberry	25	7	C Cascades	CASCADES / HIGH CASCADES / OREGON / NEWBERRY		43.7247	43.7247	-120.992	-120.992	SAE			s_RC05-4 [22162]	BASALT, CALC-ALKALINE [22162]	Pleistocene-Holocene									VOL					WR [22162]	49.9947	0.901057		18.3778				7.14192	11.3638	8.16088	0.125894		0.805618	2.83095	0.297371
CASCADES 38.8-1.9.csv	[22162]	3 Cascades	Newberry	Newberry	25	7	C Cascades	CASCADES / HIGH CASCADES / OREGON / NEWBERRY		43.9014	43.9014	-121.275	-121.275	SAE			s_RC05-6 [22162]	BASALT, CALC-ALKALINE [22162]	Pleistocene-Holocene									VOL					WR [22162]	50.047	1.16636		16.0527				7.83452	10.8068	9.36982	0.139085		1.11175	2.97117	0.500829
CASCADES 38.8-1.9.csv	[22162]	3 Cascades	Newberry	Newberry	25	7	C Cascades	CASCADES / HIGH CASCADES / OREGON / NEWBERRY		43.8728	43.8728	-121.205	-121.205	SAE			s_RC05-7 [22162]	BASALT, CALC-ALKALINE [22162]	Pleistocene-Holocene									VOL					WR [22162]	51.1875	1.26119		17.6398				8.39877	9.67444	7.43221	0.150087		0.607701	3.36215	0.286192
CASCADES 38.8-1.9.csv	[22162]	3 Cascades	Newberry	Newberry	25	7	C Cascades	CASCADES / HIGH CASCADES / OREGON / NEWBERRY		43.7132	43.7132	-121.044	-121.044	SAE			s_RC05-8 [22162]	BASALT, CALC-ALKALINE [22162]	Pleistocene-Holocene									VOL					WR [22162]	55.6508	0.7526		16.6064				6.85102	8.87054	6.71561	0.133214		1.29154	3.0141	0.114111
CASCADES 38.8-1.9.csv	[22162]	3 Cascades	Newberry	Newberry	25	7	C Cascades	CASCADES / HIGH CASCADES / OREGON / NEWBERRY		43.6157	43.6157	-121.163	-121.163	SAE			s_RC05-9 [22162]	BASALT, CALC-ALKALINE [22162]	Pleistocene-Holocene									VOL					WR [22162]	51.9165	0.915333		17.2268				7.60388	8.74697	9.57886	0.129222		0.605589	3.109	0.167839
CASCADES 38.8-1.9.csv	[22162]	3 Cascades	Newberry	Newberry	25	7	C Cascades	CASCADES / HIGH CASCADES / OREGON / NEWBERRY		43.6367	43.6367	-121.102	-121.102	SAE			s_RC06-2 [22162]	BASALT, CALC-ALKALINE [22162]	Pleistocene-Holocene									VOL					WR [22162]	50.6739	0.917378		18.5925				6.88897	10.4381	8.20304	0.12076		0.862843	2.99835	0.304179
CASCADES 38.8-1.9.csv	[22162]	3 Cascades	Newberry	Newberry	25	7	C Cascades	CASCADES / HIGH CASCADES / OREGON / NEWBERRY		43.5834	43.5834	-120.078	-120.078	SAE			s_RC07-5 [22162]	BASALT, CALC-ALKALINE [22162]	Pleistocene-Holocene									VOL					WR [22162]	49.9757	1.21404		17.3589				8.68784	9.87557	8.93685	0.158939		0.51284	3.10686	0.172483
CASCADES 38.8-1.9.csv	[22162]	3 Cascades	Newberry	Newberry	25	7	C Cascades	CASCADES / HIGH CASCADES / OREGON / NEWBERRY		43.5151	43.5151	-121.28	-121.28	SAE			s_RC07-7 [22162]	BASALT, CALC-ALKALINE [22162]	Pleistocene-Holocene									VOL					WR [22162]	49.9515	1.31948		17.4766				9.10314	9.43454	8.7151	0.158584		0.445294	3.1444	0.251404
CASCADES 38.8-1.9.csv	[22162]	3 Cascades	Newberry	Newberry	25	7	C Cascades	CASCADES / HIGH CASCADES / OREGON / NEWBERRY		43.5973	43.5973	-121.151	-121.151	SAE			s_RC09-1 [22162]	BASALT, CALC-ALKALINE [22162]	Pleistocene-Holocene									VOL					WR [22162]	52.0554	0.92217		16.5548				7.99423	8.34704	10.1627	0.131303		0.666768	2.99099	0.174561
CASCADES 38.8-1.9.csv	[22162]	3 Cascades	Newberry	Newberry	25	7	C Cascades	CASCADES / HIGH CASCADES / OREGON / NEWBERRY		43.5908	43.5908	-121.151	-121.151	SAE			s_RC09-2 [22162]	BASALT, CALC-ALKALINE [22162]	Pleistocene-Holocene									VOL					WR [22162]	52.4236	0.907063		16.8565				7.66979	8.48088	9.70267	0.127468		0.616493	3.03957	0.175974
CASCADES 38.8-1.9.csv	[22162]	3 Cascades	Newberry	Newberry	25	7	C Cascades	CASCADES / HIGH CASCADES / OREGON / NEWBERRY		43.651	43.651	-121.121	-121.121	SAE			s_RC09-3B [22162]	BASALT, CALC-ALKALINE [22162]	Pleistocene-Holocene									VOL					WR [22162]	50.5683	0.949469		18.6474				7.18654	10.2234	8.25076	0.121319		0.809014	2.92924	0.31449
CASCADES 38.8-1.9.csv	[22162]	3 Cascades	Newberry	Newberry	25	7	C Cascades	CASCADES / HIGH CASCADES / OREGON / NEWBERRY		43.6706	43.6706	-120.961	-120.961	SAE			s_RC05-2 [22162]	THOLEIITE [22162]	Pleistocene-Holocene									VOL					WR [22162]	48.7331	1.48724		16.7521				9.7133	9.75962	9.20256	0.174997		0.600734	3.16648	0.409903
CASCADES 38.8-1.9.csv	[22162]	3 Cascades	Newberry	Newberry	25	7	C Cascades	CASCADES / HIGH CASCADES / OREGON / NEWBERRY		43.671	43.671	-120.96	-120.96	SAE			s_RC05-3 [22162]	THOLEIITE [22162]	Pleistocene-Holocene									VOL					WR [22162]	48.6479	1.4859		16.7394				9.79248	9.78684	9.20416	0.175839		0.602041	3.14695	0.418448
CASCADES 38.8-1.9.csv	[22162]	3 Cascades	Newberry	Newberry	25	7	C Cascades	CASCADES / HIGH CASCADES / OREGON / NEWBERRY		43.5224	43.5224	-120.866	-120.866	SAE			s_RC06-3 [22162]	THOLEIITE [22162]	Pleistocene-Holocene									VOL					WR [22162]	49.0778	1.49789		16.5404				9.64424	9.85356	9.22292	0.172544		0.546253	3.07959	0.364867
CASCADES 38.8-1.9.csv	[22162]	3 Cascades	Newberry	Newberry	25	7	C Cascades	CASCADES / HIGH CASCADES / OREGON / NEWBERRY		43.6599	43.6599	-120.883	-120.883	SAE			s_RC07-10 [22162]	THOLEIITE [22162]	Pleistocene-Holocene									VOL					WR [22162]	48.7597	1.21823		17.5105				9.20816	11.0456	8.78169	0.171652		0.240466	2.8652	0.1988
CASCADES 38.8-1.9.csv	[22162]	3 Cascades	Newberry	Newberry	25	7	C Cascades	CASCADES / HIGH CASCADES / OREGON / NEWBERRY		43.698	43.698	-120.815	-120.815	SAE			s_RC07-11 [22162]	THOLEIITE [22162]	Pleistocene-Holocene									VOL					WR [22162]	49.5925	1.28409		17.0317				9.20604	10.828	8.27278	0.174462		0.380356	2.99775	0.232377
CASCADES 38.8-1.9.csv	[22162]	3 Cascades	Newberry	Newberry	25	7	C Cascades	CASCADES / HIGH CASCADES / OREGON / NEWBERRY		43.9384	43.9384	-121.017	-121.017	SAE			s_RC06-4 [22162]	THOLEIITE [22162]	Pleistocene-Holocene									VOL					WR [22162]	49.0135	1.63949		15.3771				9.17598	10.4045	8.97845	0.158525		2.03047	2.55737	0.664689
CASCADES 38.8-1.9.csv	[22162]	3 Cascades	Newberry	Newberry	25	7	C Cascades	CASCADES / HIGH CASCADES / OREGON / NEWBERRY		43.9382	43.9382	-121.017	-121.017	SAE			s_RC06-5 [22162]	THOLEIITE [22162]	Pleistocene-Holocene									VOL					WR [22162]	49.0403	1.63599		15.3551				9.2686	10.3957	8.9186	0.163147		2.00239	2.5657	0.654436
CASCADES 38.8-1.9.csv	[22162]	3 Cascades	Newberry	Newberry	25	7	C Cascades	CASCADES / HIGH CASCADES / OREGON / NEWBERRY		43.825	43.825	-121.533	-121.533	SAE			s_RC06-6 [22162]	BASALT, CALC-ALKALINE [22162]	Pleistocene-Holocene									VOL					WR [22162]	51.2607	1.21686		16.965				8.5453	9.42444	8.23772	0.151651		0.715239	3.24148	0.241676
CASCADES 38.8-1.9.csv	[22162]	3 Cascades	Newberry	Newberry	25	7	C Cascades	CASCADES / HIGH CASCADES / OREGON / NEWBERRY		43.836	43.836	-121.574	-121.574	SAE			s_RC06-7 [22162]	BASALT, CALC-ALKALINE [22162]	Pleistocene-Holocene									VOL					WR [22162]	49.4491	0.768004		17.6251				8.96185	11.4648	8.69457	0.175348		0.192616	2.59174	0.0768333
CASCADES 38.8-1.9.csv	[22162]	3 Cascades	Newberry	Newberry	25	7	C Cascades	CASCADES / HIGH CASCADES / OREGON / NEWBERRY		43.8282	43.8282	-121.54	-121.54	SAE			s_RC07-7B [22162]	BASALT, CALC-ALKALINE [22162]	Pleistocene-Holocene									VOL					WR [22162]	49.8958	1.2487		17.8981				8.17428	10.6761	8.07398	0.148107		0.54784	3.05387	0.283321
CASCADES 38.8-1.9.csv	[4449]	3 Cascades	Mazama	Mazama	26	7	C Cascades	CASCADES / HIGH CASCADES / OREGON / MOUNT MAZAMA	CRATER LAKE	42.83	43	-121.92	-122.08	SAE			s_1089 [4449]	ANDESITE, BASALTIC [4449]	Quaternary									VOL					WR [4449]	52	1.24		18.5		2.86	6		8.46	6.3	0.14		0.57	3.7	0.24
CASCADES 38.8-1.9.csv	[4449]	3 Cascades	Mazama	Mazama	26	7	C Cascades	CASCADES / HIGH CASCADES / OREGON / MOUNT MAZAMA	CRATER LAKE	42.83	43	-121.92	-122.08	SAE			s_1210 [4449]	ANDESITE, BASALTIC [4449]	Quaternary									VOL					WR [4449]	52.4	1.07		18		2.68	5.64		8.58	6.85	0.13		0.56	3.9	0.2
CASCADES 38.8-1.9.csv	[4449]	3 Cascades	Mazama	Mazama	26	7	C Cascades	CASCADES / HIGH CASCADES / OREGON / MOUNT MAZAMA	CRATER LAKE	42.83	43	-121.92	-122.08	SAE			s_1193 [4449]	ANDESITE, BASALTIC [4449]	Quaternary									VOL					WR [4449]	52.7	1.19		17		2.48	5.21		9.52	6.86	0.12		0.97	3.69	0.32
CASCADES 38.8-1.9.csv	[4449]	3 Cascades	Mazama	Mazama	26	7	C Cascades	CASCADES / HIGH CASCADES / OREGON / MOUNT MAZAMA	CRATER LAKE	42.83	43	-121.92	-122.08	SAE			s_1181 [4449]	ANDESITE, BASALTIC [4449]	Quaternary									VOL					WR [4449]	53	1.12		17.1		2.47	5.18		9.69	6.45	0.12		1.01	3.54	0.24
CASCADES 38.8-1.9.csv	[4449]	3 Cascades	Mazama	Mazama	26	7	C Cascades	CASCADES / HIGH CASCADES / OREGON / MOUNT MAZAMA	CRATER LAKE	42.83	43	-121.92	-122.08	SAE			s_1087 [4449]	ANDESITE, BASALTIC [4449]	Quaternary									VOL					WR [4449]	54	0.96		18.3		2.46	5.18		8.33	6.04	0.13		0.65	3.77	0.17
CASCADES 38.8-1.9.csv	[4449]	3 Cascades	Mazama	Mazama	26	7	C Cascades	CASCADES / HIGH CASCADES / OREGON / MOUNT MAZAMA	CRATER LAKE	42.83	43	-121.92	-122.08	SAE			s_354 [4449]	ANDESITE, BASALTIC [4449]	Quaternary									VOL					WR [4449]	54	1.04		16.9		2.32	4.87		8.6	7.28	0.11		1.23	3.7	0.42
CASCADES 38.8-1.9.csv	[4450][4449][20728]	3 Cascades	Mazama	Mazama	26	7	C Cascades	CASCADES / HIGH CASCADES / OREGON / MOUNT MAZAMA(CRATER LAKE)	CASTLE CREEK ABOVE LITTLE CASTLE CREEK	42.894	42.894	-122.247	-122.247	SAE			s_81C621 [4450] / s_621 [4449]	THOLEIITE, OLIVINE [4450]	Quaternary									VOL					WR [4450]	47.5	1.08		17.4		4.57	5.61		11.1	9.74	0.19		0.107	2.69	0.11
CASCADES 38.8-1.9.csv	[4450][4449][20728]	3 Cascades	Mazama	Mazama	26	7	C Cascades	CASCADES / HIGH CASCADES / OREGON / MOUNT MAZAMA(CRATER LAKE)	ROGUE RIVER NEAR BYBEE CREEK	42.934	42.934	-122.421	-122.421	SAE			s_82C894 [4450] / s_894 [4449]	THOLEIITE, OLIVINE [4450]	Quaternary									VOL					WR [4450]	47.4	1.04		17.3		1.53	7.71		11.3	9.51	0.16		0.083	2.83	0.1
CASCADES 38.8-1.9.csv	[4450][4449][20728]	3 Cascades	Mazama	Mazama	26	7	C Cascades	CASCADES / HIGH CASCADES / OREGON / MOUNT MAZAMA	E OF BALD CRATER	43.0458	43.0458	-122.205	-122.205	SAE			s_84C1143 [4450] / s_1143 [4449]	THOLEIITE, OLIVINE [4450]	Quaternary									VOL					WR [4450]	48.7	1.17		17		1.73	7.62		11.1	9.18	0.17		0.255	2.91	0.17
CASCADES 38.8-1.9.csv	[4450][20728]	3 Cascades	Mazama	Mazama	26	7	C Cascades	CASCADES / HIGH CASCADES / OREGON / MOUNT MAZAMA	E OF BALD CRATER	43.456	43.456	-122.202	-122.202	SAE			s_88C1540 [4450]	THOLEIITE, OLIVINE [4450]	Quaternary									VOL					WR [4450]	48.9	1.16		17.2		1.93	7.35		10.9	9.05	0.16		0.333	2.97	0.19
CASCADES 38.8-1.9.csv	[4450][4449][20728]	3 Cascades	Mazama	Mazama	26	7	C Cascades	CASCADES / HIGH CASCADES / OREGON / MOUNT MAZAMA	CONE E OF BALD CRATER	43.0353	43.0353	-122.202	-122.202	SAE			s_88C1530 [4450] / s_1530 [4449]	THOLEIITE, OLIVINE [4450] / BASALT, CALC-ALKALINE [4449]	Quaternary									VOL					WR [4450]	49.9	1.18		17.2		1.7	7.11		10	8.43	0.15		0.522	3.32	0.28
CASCADES 38.8-1.9.csv	[4450][20728]	3 Cascades	Mazama	Mazama	26	7	C Cascades	CASCADES / HIGH CASCADES / OREGON / MOUNT MAZAMA(CRATER LAKE)	N OF DESERT RIDGE	43.0775	43.0775	-122.158	-122.158	SAE			s_88C1557 [4450]	ANDESITE, BASALTIC [4450] / BASALT, CALC-ALKALINE [20728]	Quaternary									VOL					WR [4450]	52.1	1.12		17.3		1.96	6.09		9.42	7.59	0.14		0.669	3.52	0.26
CASCADES 38.8-1.9.csv	[4450][20728]	3 Cascades	Mazama	Mazama	26	7	C Cascades	CASCADES / HIGH CASCADES / OREGON / MOUNT MAZAMA(CRATER LAKE)	NW OF RED CONE	43.022	43.022	-122.193	-122.193	SAE			s_88C1523 [4450]	ANDESITE, BASALTIC [4450] / BASALT, CALC-ALKALINE [20728]	Quaternary									VOL					WR [4450]	52.2	1.14		16		3.19	4.48		8.94	8.23	0.12		1.122	3.79	0.52
CASCADES 38.8-1.9.csv	[4450][20728]	3 Cascades	Mazama	Mazama	26	7	C Cascades	CASCADES / HIGH CASCADES / OREGON / MOUNT MAZAMA	NW OF RED CONE	43.0145	43.0145	-122.169	-122.169	SAE			s_88C1521 [4450]	ANDESITE, BASALTIC [4450] / BASALT, CALC-ALKALINE [20728]	Quaternary									VOL					WR [4450]	53.8	0.96		16.3		2.2	5.43		8.37	8.27	0.12		0.882	3.55	0.3
CASCADES 38.8-1.9.csv	[4450][20728]	3 Cascades	Mazama	Mazama	26	7	C Cascades	CASCADES / HIGH CASCADES / OREGON / MOUNT MAZAMA	RED CONE	42.999	42.999	-122.163	-122.163	SAE			s_80C354 [4450]	ANDESITE, BASALTIC [4450] / BASALT, CALC-ALKALINE [20728]	Quaternary									VOL					WR [4450]	53	1.03		16.7		3.25	3.97		8.52	7.21	0.11		1.216	3.7	0.42
CASCADES 38.8-1.9.csv	[3208][4449]	3 Cascades	Mazama	Mazama	26	7	C Cascades	CASCADES / HIGH CASCADES / OREGON / MOUNT MAZAMA	CALDERA WALL AT STEEL BAY	42.5447	42.5447	-122.747	-122.747	SAE			s_845 [3208]	ANDESITE, BASALTIC [3208]	Quaternary									VOL					WR [3208]	52.9	1.1		17.7		2.49	5.23		9.61	6.42	0.13		0.76	3.5	0.24
CASCADES 38.8-1.9.csv	[3208][4449]	3 Cascades	Mazama	Mazama	26	7	C Cascades	CASCADES / HIGH CASCADES / OREGON / MOUNT MAZAMA	CONE N OF CRATER PEAK	42.5268	42.5268	-122.664	-122.664	SAE			s_1294 [3208]	ANDESITE, BASALTIC [3208]	Quaternary									VOL					WR [3208]	53.4	1.06		17.5		2.39	5.02		8.41	6.25	0.11		1.22	4.22	0.41
CASCADES 38.8-1.9.csv	[3208][4449]	3 Cascades	Mazama	Mazama	26	7	C Cascades	CASCADES / HIGH CASCADES / OREGON / MOUNT MAZAMA	MAKLAKS CRATER	42.5062	42.5062	-122.616	-122.616	SAE			s_1222 [3208]	ANDESITE, BASALTIC [3208]	Quaternary									VOL					WR [3208]	53.6	0.98		17.9		2.58	5.42		8.61	6.28	0.13		0.66	3.67	0.15
CASCADES 38.8-1.9.csv	[3208][4449]	3 Cascades	Mazama	Mazama	26	7	C Cascades	CASCADES / HIGH CASCADES / OREGON / MOUNT MAZAMA	VENT S CRATER PEAK	42.5045	42.5045	-122.664	-122.664	SAE			s_1216 [3208]	ANDESITE, BASALTIC [3208]	Quaternary									VOL					WR [3208]	53.7	1.04		17.5		2.41	5.05		8.34	6.39	0.12		1.27	3.87	0.35
CASCADES 38.8-1.9.csv	[3208][4449]	3 Cascades	Mazama	Mazama	26	7	C Cascades	CASCADES / HIGH CASCADES / OREGON / MOUNT MAZAMA	DESERT CONE	42.6213	42.6213	-122.701	-122.701	SAE			s_854 [3208]	ANDESITE, BASALTIC [3208]	Quaternary									VOL					WR [3208]	53.9	1.1		17.6		2.64	5.55		8.03	6.05	0.14		0.78	3.97	0.25
CASCADES 38.8-1.9.csv	[3208][4449]	3 Cascades	Mazama	Mazama	26	7	C Cascades	CASCADES / HIGH CASCADES / OREGON / MOUNT MAZAMA	BALD CRATER	42.1333	42.1333	-122.741	-122.741	SAE			s_1141 [3208]	ANDESITE, BASALTIC [3208]	Quaternary									VOL					WR [3208]	53.9	1.03		17		2.34	4.92		8.68	6.98	0.12		0.95	3.7	0.31
CASCADES 38.8-1.9.csv	[3208][4449]	3 Cascades	Mazama	Mazama	26	7	C Cascades	CASCADES / HIGH CASCADES / OREGON / MOUNT MAZAMA	RED CONE	42.166	42.166	-122.703	-122.703	SAE			s_355 [3208]	ANDESITE, BASALTIC [3208]	Quaternary									VOL					WR [3208]	54	0.95		16.4		2.34	4.92		8.01	8.15	0.11		1.15	3.68	0.31
CASCADES 38.8-1.9.csv	[17450]	3 Cascades	Mazama	Mazama	26	7	C Cascades	CASCADES / HIGH CASCADES / OREGON / MOUNT MAZAMA	CRATER LAKE	42.9545	42.9545	-122.165	-122.165	SAE			s_80C-442 [17450]	ANDESITE, BASALTIC [17450]	7.7ka									VOL					WR [17450]	53.1178	0.7216		20.746		1.85411	3.88862		9.70948	6.01333	0.0905548		0.601333	3.157	0.100222
CASCADES 38.8-1.9.csv	[17450]	3 Cascades	Mazama	Mazama	26	7	C Cascades	CASCADES / HIGH CASCADES / OREGON / MOUNT MAZAMA	CRATER LAKE	42.9728	42.9728	-122.15	-122.15	SAE			s_82C-866 [17450]	NOT GIVEN [17450]	7.7ka									VOL					WR [17450]	52.7078	0.630093		9.74994		3.20047	6.721		8.61295	15.3023	0.160024		0.555082	2.25033	0.110016
CASCADES 38.8-1.9.csv	[17450]	3 Cascades	Mazama	Mazama	26	7	C Cascades	CASCADES / HIGH CASCADES / OREGON / MOUNT MAZAMA	CRATER LAKE, VENT SW OF CASTLE POINT	42.873	42.873	-121.245	-121.245	SAE			s_92C-1771 [17450]	BASALT [17450]	10ka									VOL					WR [17450]	49.8	1.05		18		2.7	5.67		11.01	7.97	0.15		0.37	3.06	0.18
CASCADES 38.8-1.9.csv	[17450]	3 Cascades	Mazama	Mazama	26	7	C Cascades	CASCADES / HIGH CASCADES / OREGON / MOUNT MAZAMA	CRATER LAKE, N OF WILLIAMS CRATER	42.968	42.968	-122.188	-122.188	SAE			s_85C-1241 [17450]	ANDESITE, BASALTIC [17450]	34ka									VOL					WR [17450]	52.5603	1.20679		17.0547		2.5223	5.29565		9.46485	6.80193	0.129655		0.964437	3.68022	0.319152
CASCADES 38.8-1.9.csv	[17450]	3 Cascades	Mazama	Mazama	26	7	C Cascades	CASCADES / HIGH CASCADES / OREGON / MOUNT MAZAMA	CRATER LAKE, RED CONE	42.9982	42.9982	-122.163	-122.163	SAE			s_80C-354 [17450]	ANDESITE, BASALTIC [17450]	35ka									VOL					WR [17450]	53.7457	1.0351		16.8204		2.30908	4.84707		8.56261	7.24572	0.109482		1.22421	3.68258	0.418022
CASCADES 38.8-1.9.csv	[17450]	3 Cascades	Mazama	Mazama	26	7	C Cascades	CASCADES / HIGH CASCADES / OREGON / MOUNT MAZAMA	CRATER LAKE, WILLIAMS CRATER	42.9572	42.9572	-122.196	-122.196	SAE			s_81C-543 [17450]	ANDESITE, BASALTIC [17450]	35ka									VOL					WR [17450]	51.5258	1.25063		16.7084		2.53127	5.31266		9.88494	7.63382	0.130065		0.90045	3.70185	0.42021
CASCADES 38.8-1.9.csv	[17450]	3 Cascades	Mazama	Mazama	26	7	C Cascades	CASCADES / HIGH CASCADES / OREGON / MOUNT MAZAMA	CRATER LAKE, LITTLE CASTLE CREEK	42.898	42.898	-122.24	-122.24	SAE			s_82C-814 [17450]	ANDESITE, BASALTIC [17450]	35ka									VOL					WR [17450]	52.8139	1.12455		17.0691		2.00813	5.12074		9.73944	6.97826	0.120488		1.01913	3.63472	0.371505
CASCADES 38.8-1.9.csv	[17450]	3 Cascades	Mazama	Mazama	26	7	C Cascades	CASCADES / HIGH CASCADES / OREGON / MOUNT MAZAMA	CRATER LAKE, RED CONE	42.995	42.995	-122.169	-122.169	SAE			s_80C-355 [17450]	ANDESITE, BASALTIC [17450]	35ka									VOL					WR [17450]	53.987	0.949771		16.3961		2.33944	4.91882		8.00807	8.15212	0.109974		1.14972	3.67911	0.309925
CASCADES 38.8-1.9.csv	[4684][3613]	3 Cascades	Shasta	Shasta	27	8	S Cascades	CASCADES / HIGH CASCADES / CALIFORNIA / MOUNT SHASTA	HAYSTACK	41.544	41.544	-122.279	-122.279	SAE			s_85-1A [4684]	ANDESITE, BASALTIC [4684]	Quaternary									VOL					WR [4684]	51.52	0.56		15.55		1.68	6.05	7.63	9.92	10.58	0.16		0.38	2.64	0.1	3.7
CASCADES 38.8-1.9.csv	[4684][10782][8496]	3 Cascades	Shasta	Shasta	27	8	S Cascades	CASCADES / HIGH CASCADES / CALIFORNIA / MOUNT SHASTA	SARGENTS RIDGE, MISERY HILL	41.3475	41.3475	-122.167	-122.167	SAE			s_95-15 [4684]	ANDESITE, BASALTIC [4684] / NOT GIVEN [8496]	10000 [4684]	10000 [4684]	80000 [4684]							VOL					WR [4684]	50.93	0.66		15.54		8.18			9.94	10.65	0.14		0.76	2.73	0.28
CASCADES 38.8-1.9.csv	[4684][10782]	3 Cascades	Shasta	Shasta	27	8	S Cascades	CASCADES / HIGH CASCADES / CALIFORNIA / MOUNT SHASTA	SARGENTS RIDGE	41.3186	41.3186	-122.167	-122.167	SAE			s_95-17 [4684]	ANDESITE, BASALTIC [4684]	Quaternary									VOL					WR [4684]	51.28	0.92		16.99		8.61			10.3	8.41	0.14		0.22	3.02	0.13
CASCADES 38.8-1.9.csv	[4684][3613][10782][8496]	3 Cascades	Shasta	Shasta	27	8	S Cascades	CASCADES / HIGH CASCADES / CALIFORNIA / MOUNT SHASTA	MISERY HILL	41.479	41.479	-122.189	-122.189	SAE			s_82-94A [4684] / s_8294A [10782]	ANDESITE, BASALTIC [4684] / NOT GIVEN [8496]	Quaternary									VOL					WR [4684]	52.5	0.72		15.3		2.93	4.43	7.12	9.61	10.17	0.14		0.58	3.01	0.22	4.5
CASCADES 38.8-1.9.csv	[4684][3613][10782][8496]	3 Cascades	Shasta	Shasta	27	8	S Cascades	CASCADES / HIGH CASCADES / CALIFORNIA / MOUNT SHASTA	SARGENTS RIDGE	41.4775	41.4775	-122.299	-122.299	SAE			s_85-44 [4684]	ANDESITE, BASALTIC [4684] / NOT GIVEN [8496]	Quaternary									VOL					WR [4684]	51.18	0.59		15.84		1.31	6.65	7.93	9.65	10.65	0.16		0.41	2.21	0.11	3.7
CASCADES 38.8-1.9.csv	[4684][3613][10782][8496]	3 Cascades	Shasta	Shasta	27	8	S Cascades	CASCADES / HIGH CASCADES / CALIFORNIA / MOUNT SHASTA	MISERY HILL	41.5683	41.5683	-122.131	-122.131	SAE			s_85-41B [4684]	ANDESITE [4684] / NOT GIVEN [8496]	Quaternary									VOL					WR [4684]	57.87	0.6		14.67			5.69	5.69	8.13	8.88	0.11		0.72	3.18	0.16	6.5
CASCADES 38.8-1.9.csv	[4684][3613][10782][8496]	3 Cascades	Shasta	Shasta	27	8	S Cascades	CASCADES / HIGH CASCADES / CALIFORNIA / MOUNT SHASTA	MISERY HILL	41.559	41.559	-122.256	-122.256	SAE			s_85-38 [4684]	THOLEIITE, OLIVINE [4684] / BASALT [3613] / THOLEIITE [10782] / NOT GIVEN [8496]	Quaternary									VOL					WR [4684]	49.14	0.87		16.95		0.84	7.86	7.86	10.61	9.6	0.18		0.3	2.11	0.11	0
CASCADES 38.8-1.9.csv	[4684][3613][10782]	3 Cascades	Shasta	Shasta	27	8	S Cascades	CASCADES / HIGH CASCADES / CALIFORNIA / MOUNT SHASTA	MISERY HILL	41.3911	41.3911	-122.025	-122.025	SAE			s_85-51 [4684]	THOLEIITE, OLIVINE [4684] / BASALT [3613]	Quaternary									VOL					WR [4684]	48.51	1.04		17.27		1.3	7.96	7.96	10.75	9.17	0.18		0.21	2.55	0.11	0
CASCADES 38.8-1.9.csv	[4450][20728]	3 Cascades	Shasta	Shasta	27	8	S Cascades	CASCADES / HIGH CASCADES / CALIFORNIA / MOUNT SHASTA		41.243	41.243	-122.023	-122.023	SAE			s_75SH-270 [4450]	THOLEIITE, OLIVINE [4450]	Quaternary									VOL					WR [4450]	49.4	1.01		17.4		1.21	8		10.9	9.3	0.17		0.284	2.68	0.11
CASCADES 38.8-1.9.csv	[4450][20728]	3 Cascades	Shasta	Shasta	27	8	S Cascades	CASCADES / HIGH CASCADES / CALIFORNIA / MOUNT SHASTA		41.4803	41.4803	-122.206	-122.206	SAE			s_75SV-3 [4450]	ANDESITE, BASALTIC [4450] / BASALT, CALC-ALKALINE [20728]	Quaternary									VOL					WR [4450]	53.1	0.7		15.1		3.21	4.15		9.73	9.78	0.13		0.698	2.99	0.21
CASCADES 38.8-1.9.csv	[4450][20728]	3 Cascades	Shasta	Shasta	27	8	S Cascades	CASCADES / HIGH CASCADES / CALIFORNIA / MOUNT SHASTA		41.2616	41.2616	-122.219	-122.219	SAE			s_75SH-317 [4450]	ANDESITE, BASALTIC [4450] / BASALT, CALC-ALKALINE [20728]	Quaternary									VOL					WR [4450]	52.9	0.56		16.8		2.15	5.2		9.62	8.94	0.13		0.468	3.06	0.11
CASCADES 38.8-1.9.csv	[4450][20728]	3 Cascades	Shasta	Shasta	27	8	S Cascades	CASCADES / HIGH CASCADES / CALIFORNIA / MOUNT SHASTA		41.261	41.261	-122.219	-122.219	SAE			s_75SH-268 [4450]	ANDESITE, BASALTIC [4450] / BASALT, CALC-ALKALINE [20728]	Quaternary									VOL					WR [4450]	55.3	0.77		16.8		1.55	5.11		8.75	6.59	0.11		0.842	3.35	0.18
CASCADES 38.8-1.9.csv	[4450]	3 Cascades	Medicine Lake	Medicine Lake	28	8	S Cascades	CASCADES / HIGH CASCADES / CALIFORNIA / MEDICINE LAKE VOLCANO		41.5	41.5	-121.632	-121.632	SAE			s_880M [4450]	THOLEIITE, OLIVINE [4450]	Quaternary									VOL					WR [4450]	47.9	0.63		18.3		1.24	7.31		12.1	10.3	0.15		0.073	2.33	0.05
CASCADES 38.8-1.9.csv	[5304]	3 Cascades	Medicine Lake	Medicine Lake	28	8	S Cascades	CASCADES / HIGH CASCADES / CALIFORNIA / MEDICINE LAKE VOLCANO / BURNT LAVA FLOW	SE END OF FLOW, 1300 FT N AND 1500 FT W OF SE CORNER, WHITEHORSE	41.58	41.58	-121.58	-121.58	SAE			s_692M [5304]	ANDESITE [5304]	Holocene			UPPER [5304]	HOLOCENE [5304]					VOL					WR [5304]	56.1	0.66		16.5				6.2	8.26	6.05	0.11		1.53	3.04	0.1
CASCADES 38.8-1.9.csv	[5304]	3 Cascades	Medicine Lake	Medicine Lake	28	8	S Cascades	CASCADES / HIGH CASCADES / CALIFORNIA / MEDICINE LAKE VOLCANO / BURNT LAVA FLOW	SURFACE OF FLOW W OF HIGH HOLE CRATER, 2500 FT S AND 2500 FT W OF NE CORNER, MEDICINE LAKE	41.58	41.58	-121.58	-121.58	SAE			s_659MA [5304]	ANDESITE [5304]	Holocene			UPPER [5304]	HOLOCENE [5304]					VOL					WR [5304]	48.4	0.6		18.4				7.94	12	10.1	0.15		0.19	2.1	0.07
CASCADES 38.8-1.9.csv	[5304]	3 Cascades	Medicine Lake	Medicine Lake	28	8	S Cascades	CASCADES / HIGH CASCADES / CALIFORNIA / MEDICINE LAKE VOLCANO / BURNT LAVA FLOW	SURFACE OF FLOW W OF HIGH HOLE CRATER, 2500 FT S AND 2500 FT W OF NE CORNER, MEDICINE LAKE	41.58	41.58	-121.58	-121.58	SAE			s_659MB [5304]	ANDESITE [5304]	Holocene			UPPER [5304]	HOLOCENE [5304]					VOL					WR [5304]	47.9	0.62		18.4				7.92	11.97	9.9	0.15		0.19	2.09	0.07
CASCADES 38.8-1.9.csv	[5304]	3 Cascades	Medicine Lake	Medicine Lake	28	8	S Cascades	CASCADES / HIGH CASCADES / CALIFORNIA / MEDICINE LAKE VOLCANO / BURNT LAVA FLOW	N END OF FLOW, 800 FT E AND 300 FT N OF NE CORNER, MEDICINE LAKE	41.58	41.58	-121.58	-121.58	SAE			s_937MA [5304]	ANDESITE [5304]	Holocene			UPPER [5304]	HOLOCENE [5304]					VOL					WR [5304]	49.1	0.44		19				6.72	11.5	9.89	0.12		0.39	2.1	0.05
CASCADES 38.8-1.9.csv	[5304]	3 Cascades	Medicine Lake	Medicine Lake	28	8	S Cascades	CASCADES / HIGH CASCADES / CALIFORNIA / MEDICINE LAKE VOLCANO / BURNT LAVA FLOW	SURFACE OF FLOW W OF HIGH HOLE CRATER, 2200 FT W AND 2400 S OF NE CORNER, MEDICINE LAKE	41.58	41.58	-121.58	-121.58	SAE			s_1143MB [5304]	ANDESITE [5304]	Holocene			UPPER [5304]	HOLOCENE [5304]					VOL					WR [5304]	51.4	0.66		17.7				7.41	10.5	8.36	0.15		0.66	2.52	0.09
CASCADES 38.8-1.9.csv	[5304]	3 Cascades	Medicine Lake	Medicine Lake	28	8	S Cascades	CASCADES / HIGH CASCADES / CALIFORNIA / MEDICINE LAKE VOLCANO / BURNT LAVA FLOW	HIGH HOLE CRATER CONE, 1600 FT W AND 1800 FT N OF SE CORNER, MEDICINE LAKE	41.58	41.58	-121.58	-121.58	SAE			s_1156M [5304]	ANDESITE [5304]	Holocene			UPPER [5304]	HOLOCENE [5304]					VOL					WR [5304]	49.4	0.64		18.4				7.77	11.8	8.97	0.15		0.28	2.55	0.08
CASCADES 38.8-1.9.csv	[6578]	3 Cascades	Medicine Lake	Medicine Lake	28	8	S Cascades	CASCADES / HIGH CASCADES / CALIFORNIA / MEDICINE LAKE VOLCANO		41.33	41.83	-121.33	-121.75	SAE			s_733M [6578]	BASALT, CALC-ALKALINE [6578]	3200 [6578]		3200 [6578]						COARSELY PORPHYRITIC [6578]	VOL					WR [6578]	50.09	0.81		17.91				7.93	10.82	8.37	0.14		0.45	2.72	0.11
CASCADES 38.8-1.9.csv	[6764]	3 Cascades	Medicine Lake	Medicine Lake	28	8	S Cascades	CASCADES / HIGH CASCADES / CALIFORNIA / MEDICINE LAKE VOLCANO	GLASS MOUNTAIN	41.616	41.616	-121.517	-121.517	SAE			s_1141M [6764]	NOT GIVEN [6764]									CUMULATE [6764]	VOL					WR [6764]	51.8	0.46		20				6.13	9.53	7.87	0.09		0.75	2.68	0.1
CASCADES 38.8-1.9.csv	[4450][20728]	3 Cascades	Medicine Lake	Medicine Lake	28	8	S Cascades	CASCADES / HIGH CASCADES / CALIFORNIA / MEDICINE LAKE VOLCANO		41.785	41.785	-121.615	-121.615	SAE			s_767M [4450]	THOLEIITE, OLIVINE [4450]	Quaternary									VOL					WR [4450]	47.3	0.71		18		1.5	7.2		11.8	10.4	0.15		0.062	2.38	0.08
CASCADES 38.8-1.9.csv	[4450][20728]	3 Cascades	Medicine Lake	Medicine Lake	28	8	S Cascades	CASCADES / HIGH CASCADES / CALIFORNIA / MEDICINE LAKE VOLCANO		41.9083	41.9083	-121.643	-121.643	SAE			s_1085M [4450]	THOLEIITE, OLIVINE [4450]	Quaternary									VOL					WR [4450]	48	0.74		17.8		1.94	7.15		11.9	10.3	0.16		0.085	2.43	0.08
CASCADES 38.8-1.9.csv	[4450][20728]	3 Cascades	Medicine Lake	Medicine Lake	28	8	S Cascades	CASCADES / HIGH CASCADES / CALIFORNIA / MEDICINE LAKE VOLCANO		41.7867	41.7867	-121.567	-121.567	SAE			s_851M [4450]	THOLEIITE, OLIVINE [4450]	Quaternary									VOL					WR [4450]	47.6	0.77		18.4		1.75	7.1		11.7	9.91	0.16		0.094	2.47	0.1
CASCADES 38.8-1.9.csv	[4450][20728]	3 Cascades	Medicine Lake	Medicine Lake	28	8	S Cascades	CASCADES / HIGH CASCADES / CALIFORNIA / MEDICINE LAKE VOLCANO		41.5483	41.5483	-121.235	-121.235	SAE			s_1376M [4450]	THOLEIITE, OLIVINE [4450]	Quaternary									VOL					WR [4450]	47.9	0.8		18.2		1.83	7.29		11.3	9.4	0.16		0.114	2.46	0.07
CASCADES 38.8-1.9.csv	[4450][20728]	3 Cascades	Medicine Lake	Medicine Lake	28	8	S Cascades	CASCADES / HIGH CASCADES / CALIFORNIA / MEDICINE LAKE VOLCANO		41.5	41.5	-121.634	-121.634	SAE			s_881M [4450]	THOLEIITE, OLIVINE [4450]	Quaternary									VOL					WR [4450]	49	0.9		17.7		1.17	7.86		11.4	8.63	0.16		0.333	2.78	0.11
CASCADES 38.8-1.9.csv	[4450][20728]	3 Cascades	Medicine Lake	Medicine Lake	28	8	S Cascades	CASCADES / HIGH CASCADES / CALIFORNIA / MEDICINE LAKE VOLCANO		41.5105	41.5105	-121.626	-121.626	SAE			s_1161M [4450]	THOLEIITE, OLIVINE [4450]	Quaternary									VOL					WR [4450]	52.7	0.92		16.7		1.34	6.9		9.55	6.85	0.15		1.092	3.05	0.13
CASCADES 38.8-1.9.csv	[5304]	3 Cascades	Medicine Lake	Medicine Lake	28	8	S Cascades	CASCADES / HIGH CASCADES / CALIFORNIA / MEDICINE LAKE VOLCANO / BURNT LAVA FLOW	HIGH HOLE CRATER CONE, 1600 FT W AND 1800 FT N OF SE CORNER, MEDICINE LAKE	41.58	41.58	-121.58	-121.58	SAE			s_1155M [5304]	ANDESITE [5304]	Holocene			UPPER [5304]	HOLOCENE [5304]					VOL					WR [5304]	48	0.44		19.7				7	11.9	10.5	0.12		0.12	2.25
CASCADES 38.8-1.9.csv	[5304]	3 Cascades	Medicine Lake	Medicine Lake	28	8	S Cascades	CASCADES / HIGH CASCADES / CALIFORNIA / MEDICINE LAKE VOLCANO / BURNT LAVA FLOW	N END OF FLOW, 1000 FT W AND 500 FT N OF NE CORNER, MEDICINE LAKE	41.58	41.58	-121.58	-121.58	SAE			s_716MA [5304]	ANDESITE [5304]	Holocene			UPPER [5304]	HOLOCENE [5304]					VOL					WR [5304]	48.6	0.67		17.9				7.79	11.7	9.44	0.14		0.32	1.99	0.08
CASCADES 38.8-1.9.csv	[5796][10782]	3 Cascades	Medicine Lake	Medicine Lake	28	8	S Cascades	CASCADES / HIGH CASCADES / CALIFORNIA / MEDICINE LAKE VOLCANO / CALLAHAN FLOW	SW EDGE	41.678	41.678	-121.613	-121.613	SAE			s_1399M [5796]	ANDESITE, BASALTIC [5796]	Holocene			UPPER [5796]	HOLOCENE [5796]					VOL					WR [5796]	51.8	1		17.9				9.35	9.99	6.62	0.15		0.57	3.33	0.18
CASCADES 38.8-1.9.csv	[5796][6578]	3 Cascades	Medicine Lake	Medicine Lake	28	8	S Cascades	CASCADES / HIGH CASCADES / CALIFORNIA / MEDICINE LAKE VOLCANO / CALLAHAN FLOW	SW EDGE	41.428	41.428	-121.613	-121.613	SAE			s_1513M [5796]	ANDESITE, BASALTIC [5796] / BASALT, CALC-ALKALINE [6578]	1050 [6578]		1050 [6578]	UPPER [5796]	HOLOCENE [5796]					VOL					WR [5796]	51.2	0.94		18				9.1	9.9	6.56	0.15		0.55	3.25	0.17
CASCADES 38.8-1.9.csv	[5796]	3 Cascades	Medicine Lake	Medicine Lake	28	8	S Cascades	CASCADES / HIGH CASCADES / CALIFORNIA / MEDICINE LAKE VOLCANO / PAINT POT CRATER FLOW	HIGHWAY ROADCUT NEAR SOUTH END	41.525	41.525	-121.707	-121.707	SAE			s_41M [5796]	ANDESITE, BASALTIC [5796]	Holocene			UPPER [5796]	HOLOCENE [5796]					VOL					WR [5796]	52.8	0.83		18.5				8.22	9.37	6.73	0.13		0.69	3.18	0.17
CASCADES 38.8-1.9.csv	[4329][7037]	3 Cascades	Medicine Lake	Medicine Lake	28	8	S Cascades	CASCADES / HIGH CASCADES / CALIFORNIA / MEDICINE LAKE VOLCANO	GIANT CRATER, GROUP 1	41.5142	41.5142	-121.628	-121.628	SAE	1792	1804	s_863M [4329]	BASALT, ANDESITIC [4329]	10500 [7037]	10500 [7037]	10500 [4329]							VOL					WR [4329]	53.2	0.91		16.9				8.13	9.67	7.02	0.15		1.03	2.91	0.12
CASCADES 38.8-1.9.csv	[7037][4329]	3 Cascades	Medicine Lake	Medicine Lake	28	8	S Cascades	CASCADES / HIGH CASCADES / CALIFORNIA / MEDICINE LAKE VOLCANO	GIANT CRATER, GROUP 1	41.5188	41.5188	-121.627	-121.627	SAE	1792	1804	s_1009M [7037]	BASALT, ANDESITIC [7037]	10500 [7037]	10500 [7037]	10500 [7037]							VOL					WR [7037]	52.4	0.92		17				8.22	9.75	7.23	0.15		0.97	2.89	0.13
CASCADES 38.8-1.9.csv	[4329][7037]	3 Cascades	Medicine Lake	Medicine Lake	28	8	S Cascades	CASCADES / HIGH CASCADES / CALIFORNIA / MEDICINE LAKE VOLCANO	GIANT CRATER, GROUP 1	41.5105	41.5105	-121.626	-121.626	SAE	1792	1804	s_1161M [4329]	BASALT, ANDESITIC [4329]	10500 [7037]	10500 [7037]	10500 [4329]							VOL					WR [4329]	53.2	0.93		16.8				8.18	9.63	6.91	0.15		1.1	2.98	0.13
CASCADES 38.8-1.9.csv	[7037]	3 Cascades	Medicine Lake	Medicine Lake	28	8	S Cascades	CASCADES / HIGH CASCADES / CALIFORNIA / MEDICINE LAKE VOLCANO	GIANT CRATER, GROUP 2	41.5032	41.5032	-121.627	-121.627	SAE	1743	1804	s_879M [7037]	BASALT, CALC-ALKALINE [7037]	10500 [7037]	10500 [7037]	10500 [7037]							VOL					WR [7037]	52.1	0.94		16.9				8.46	10.1	7.32	0.15		0.83	2.87	0.14
CASCADES 38.8-1.9.csv	[4329][7037]	3 Cascades	Medicine Lake	Medicine Lake	28	8	S Cascades	CASCADES / HIGH CASCADES / CALIFORNIA / MEDICINE LAKE VOLCANO	GIANT CRATER, GROUP 2	41.5032	41.5032	-121.63	-121.63	SAE	1743	1804	s_1002M [4329]	BASALT, CALC-ALKALINE [4329]	10500 [7037]	10500 [7037]	10500 [4329]							VOL					WR [4329]	52.2	0.94		17.4				8.34	9.98	7.16	0.15		0.86	2.85	0.15
CASCADES 38.8-1.9.csv	[7037][4329]	3 Cascades	Medicine Lake	Medicine Lake	28	8	S Cascades	CASCADES / HIGH CASCADES / CALIFORNIA / MEDICINE LAKE VOLCANO	GIANT CRATER, GROUP 2	41.5075	41.5075	-121.63	-121.63	SAE	1743	1804	s_1006M [7037]	BASALT, CALC-ALKALINE [7037]	10500 [7037]	10500 [7037]	10500 [7037]							VOL					WR [7037]	51.4	0.94		17.3				8.42	10.1	7.45	0.16		0.75	2.74	0.15
CASCADES 38.8-1.9.csv	[4329][7037]	3 Cascades	Medicine Lake	Medicine Lake	28	8	S Cascades	CASCADES / HIGH CASCADES / CALIFORNIA / MEDICINE LAKE VOLCANO	GIANT CRATER, GROUP 3, CHIMNEY CRATER	41.4208	41.4208	-121.656	-121.656	SAE	1804	1804	s_328M [4329]	BASALT, CALC-ALKALINE [4329]	10500 [7037]	10500 [7037]	10500 [4329]							VOL					WR [4329]	51.2	0.99		17.4				8.75	10.21	7.57	0.16		0.74	2.87	0.14
CASCADES 38.8-1.9.csv	[4329][7037]	3 Cascades	Medicine Lake	Medicine Lake	28	8	S Cascades	CASCADES / HIGH CASCADES / CALIFORNIA / MEDICINE LAKE VOLCANO	GIANT CRATER, GROUP 3, CHIMNEY CRATER	41.5077	41.5077	-121.63	-121.63	SAE	1804	1804	s_1007M [4329]	BASALT, CALC-ALKALINE [4329]	10500 [7037]	10500 [7037]	10500 [4329]							VOL					WR [4329]	51.1	0.98		17.4				8.73	10.43	7.64	0.16		0.69	2.8	0.15
CASCADES 38.8-1.9.csv	[4329][7037]	3 Cascades	Medicine Lake	Medicine Lake	28	8	S Cascades	CASCADES / HIGH CASCADES / CALIFORNIA / MEDICINE LAKE VOLCANO	GIANT CRATER, GROUP 3, CHIMNEY CRATER	41.5105	41.5105	-121.631	-121.631	SAE	1804	1804	s_1008M [4329]	BASALT, CALC-ALKALINE [4329]	10500 [7037]	10500 [7037]	10500 [4329]							VOL					WR [4329]	51.1	0.99		17.4				8.69	10.33	7.62	0.16		0.71	2.83	0.16
CASCADES 38.8-1.9.csv	[7037][4329]	3 Cascades	Medicine Lake	Medicine Lake	28	8	S Cascades	CASCADES / HIGH CASCADES / CALIFORNIA / MEDICINE LAKE VOLCANO	GIANT CRATER, GROUP 4	41.5	41.5	-121.634	-121.634	SAE	1701	1743	s_881M [7037]	BASALT, THOLEIITIC [7037]	10500 [7037]	10500 [7037]	10500 [7037]							VOL					WR [7037]	49	0.9		17.7				8.91	11.4	8.63	0.16		0.33	2.65	0.11
CASCADES 38.8-1.9.csv	[4450][7037][4329][6578][20728][8496][13184]	3 Cascades	Medicine Lake	Medicine Lake	28	8	S Cascades	CASCADES / HIGH CASCADES / CALIFORNIA / MEDICINE LAKE VOLCANO	GIANT CRATER, GROUP 6	41.505	41.5053	-121.644	-121.645	SAE	1615	1743	s_82-72F [4450] / s_82-72-F [20728]	THOLEIITE, OLIVINE [4450] / BASALT, THOLEIITIC [7037] / BASALT [6578] / NOT GIVEN [8496]	10500 [7037] / 12700 [6578]	10500 [7037] / 12700 [6578]	10500 [7037] / 12700 [6578]						NONPORPHYRITIC [13184]	VOL					WR [4450]	47.6	0.59		18.5		2.06	6.33	8.07	12	10.5	0.15		0.08	2.16	0.06
CASCADES 38.8-1.9.csv	[7037][4329]	3 Cascades	Medicine Lake	Medicine Lake	28	8	S Cascades	CASCADES / HIGH CASCADES / CALIFORNIA / MEDICINE LAKE VOLCANO	GIANT CRATER, GROUP 6	41.505	41.5053	-121.644	-121.645	SAE	1615	1743	s_904M [7037]	BASALT, THOLEIITIC [7037]	10500 [7037]	10500 [7037]	10500 [7037]							VOL					WR [7037]	48.1	0.66		17.5				8.9	12.3	9.75	0.16		0.08	2.29	0.05
CASCADES 38.8-1.9.csv	[4329][7037]	3 Cascades	Medicine Lake	Medicine Lake	28	8	S Cascades	CASCADES / HIGH CASCADES / CALIFORNIA / MEDICINE LAKE VOLCANO	GIANT CRATER, GROUP 6	41.5083	41.5083	-121.638	-121.638	SAE	1615	1743	s_1004M [4329]	BASALT, THOLEIITIC [4329]	10500 [7037]	10500 [7037]	10500 [4329]							VOL					WR [4329]	47.8	0.64		18.2				8.58	12.21	10.01	0.16		0.07	2.24	0.06
CASCADES 38.8-1.9.csv	[4329][7037]	3 Cascades	Medicine Lake	Medicine Lake	28	8	S Cascades	CASCADES / HIGH CASCADES / CALIFORNIA / MEDICINE LAKE VOLCANO	GIANT CRATER, RELATED LAVAS, HORSE CAVES-WATER CAVES LAVAS	41.4733	41.4733	-121.636	-121.636	SAE	1554	1573	s_4B543 [4329]	BASALT, THOLEIITIC [4329]	10500 [7037]	10500 [7037]	10500 [4329]							VOL					WR [4329]	52.9	0.96		17.2				7.72	9.25	7.5	0.14		1.15	3.04	0.16
CASCADES 38.8-1.9.csv	[7037][4329]	3 Cascades	Medicine Lake	Medicine Lake	28	8	S Cascades	CASCADES / HIGH CASCADES / CALIFORNIA / MEDICINE LAKE VOLCANO	GIANT CRATER, RELATED LAVAS, HORSE CAVES-WATER CAVES LAVAS	41.47	41.47	-121.64	-121.64	SAE	1554	1573	s_887M [7037]	BASALT, THOLEIITIC [7037]	10500 [7037]	10500 [7037]	10500 [7037]							VOL					WR [7037]	49.8	0.98		18				8.29	10.33	8.62	0.15		0.62	2.89	0.16
CASCADES 38.8-1.9.csv	[7037][4329]	3 Cascades	Medicine Lake	Medicine Lake	28	8	S Cascades	CASCADES / HIGH CASCADES / CALIFORNIA / MEDICINE LAKE VOLCANO	GIANT CRATER, RELATED LAVAS, HORSE CAVES-WATER CAVES LAVAS	41.4543	41.4543	-121.629	-121.629	SAE	1554	1573	s_1144M [7037]	BASALT, THOLEIITIC [7037]	10500 [7037]	10500 [7037]	10500 [7037]							VOL					WR [7037]	52.7	0.92		17				7.63	9.18	7.53	0.14		1.14	3	0.15
CASCADES 38.8-1.9.csv	[7037][4329]	3 Cascades	Medicine Lake	Medicine Lake	28	8	S Cascades	CASCADES / HIGH CASCADES / CALIFORNIA / MEDICINE LAKE VOLCANO	GIANT CRATER, RELATED LAVAS, HORSE CAVES-WATER CAVES LAVAS	41.3388	41.3388	-121.572	-121.572	SAE	1554	1573	s_1171M [7037]	BASALT, THOLEIITIC [7037]	10500 [7037]	10500 [7037]	10500 [7037]							VOL					WR [7037]	52	0.97		17.2				7.85	9.35	7.63	0.14		1.04	2.97	0.18
CASCADES 38.8-1.9.csv	[4329][6578]	3 Cascades	Medicine Lake	Medicine Lake	28	8	S Cascades	CASCADES / HIGH CASCADES / CALIFORNIA / MEDICINE LAKE VOLCANO	GIANT CRATER, RELATED LAVAS, HORSE CAVES-WATER CAVES LAVAS	41.3965	41.3965	-121.637	-121.637	SAE	1554	1573	s_1386M [4329]	BASALT, THOLEIITIC [4329] / RHYOLITE [6578]	850 [6578]	850 [6578]	10500 [4329] / 850 [6578]							VOL					WR [4329]	52.8	0.93		17.3				7.68	9.36	7.59	0.14		1.12	2.95	0.15
CASCADES 38.8-1.9.csv	[7037][4329]	3 Cascades	Medicine Lake	Medicine Lake	28	8	S Cascades	CASCADES / HIGH CASCADES / CALIFORNIA / MEDICINE LAKE VOLCANO	GIANT CRATER, RELATED LAVAS, VENT 5 LAVAS	41.4823	41.4823	-121.696	-121.696	SAE	1536	1536	s_1375M [7037]	BASALT, THOLEIITIC [7037]	10500 [7037]	10500 [7037]	10500 [7037]							VOL					WR [7037]	52.5	0.86		17				8.03	9.81	7.29	0.14		0.97	2.83	0.12
CASCADES 38.8-1.9.csv	[15661]	3 Cascades	Medicine Lake	Medicine Lake	28	8	S Cascades	CASCADES / HIGH CASCADES / CALIFORNIA / MEDICINE LAKE VOLCANO		41.5305	41.5305	-121.711	-121.711	SAE			s_08MLV-01 [15661]	ANDESITE, BASALTIC [15661]	<Pleistocene									VOL					WR [15661]	52.8	0.83		18.5				8.22	3.18	9.37	6.73		0.17	0.69
CASCADES 38.8-1.9.csv	[15661]	3 Cascades	Medicine Lake	Medicine Lake	28	8	S Cascades	CASCADES / HIGH CASCADES / CALIFORNIA / MEDICINE LAKE VOLCANO		41.5285	41.5285	-121.71	-121.71	SAE			s_08MLV-02 [15661]	ANDESITE, BASALTIC [15661]	<Pleistocene									VOL					WR [15661]	52.8	0.83		18.5				8.22	3.18	9.37	6.73		0.17	0.69
CASCADES 38.8-1.9.csv	[15661]	3 Cascades	Medicine Lake	Medicine Lake	28	8	S Cascades	CASCADES / HIGH CASCADES / CALIFORNIA / MEDICINE LAKE VOLCANO		41.547	41.547	-121.693	-121.693	SAE			s_08MLV-05 [15661]	THOLEIITE, OLIVINE [15661]	<Pleistocene									VOL					WR [15661]	49.3	0.9		18.3				8.32	10.88	8.79	0.15		0.33	2.9	0.15
CASCADES 38.8-1.9.csv	[15661]	3 Cascades	Medicine Lake	Medicine Lake	28	8	S Cascades	CASCADES / HIGH CASCADES / CALIFORNIA / MEDICINE LAKE VOLCANO		41.8538	41.8538	-121.388	-121.388	SAE			s_08MLV-16 [15661]	THOLEIITE, OLIVINE [15661]	<Pleistocene									VOL					WR [15661]	48	1.28		17.9				9.66	3.14	10.4	8.52		0.28	0.56
CASCADES 38.8-1.9.csv	[15661]	3 Cascades	Medicine Lake	Medicine Lake	28	8	S Cascades	CASCADES / HIGH CASCADES / CALIFORNIA / MEDICINE LAKE VOLCANO		41.7388	41.7388	-121.525	-121.525	SAE			s_08MLV-20 [15661]	THOLEIITE, OLIVINE [15661]	<Pleistocene									VOL					WR [15661]	50.2	0.87		17.9				8.67	2.8	10.4	8.45		0.11	0.48	0.04
CASCADES 38.8-1.9.csv	[15661]	3 Cascades	Medicine Lake	Medicine Lake	28	8	S Cascades	CASCADES / HIGH CASCADES / CALIFORNIA / MEDICINE LAKE VOLCANO		41.5387	41.5387	-121.154	-121.154	SAE			s_08MLV-25 [15661]	THOLEIITE, OLIVINE [15661]	<Pleistocene									VOL					WR [15661]	47.8	1.1		17.9				9.73	2.73	11.4	8.78		0.15	0.21	0
CASCADES 38.8-1.9.csv	[3657][4943]	3 Cascades	Lassen	Lassen	29	8	S Cascades	CASCADES / HIGH CASCADES / CALIFORNIA / LASSEN VOLCANIC CENTER	SOUTHERNMOST CASCADES	40.249	40.249	-121.771	-121.771	SAE			s_LC88-1303 [3657]	ANDESITE [3657] / BASALT, CALC-ALKALINE [4943]	Holocene		500000 [3657]							VOL					WR [3657]	57.61	0.53		14.61		1.53	5.51	6.88	8.7	7.49	0.12		1.11	2.69	0.1
CASCADES 38.8-1.9.csv	[3657][4943]	3 Cascades	Lassen	Lassen	29	8	S Cascades	CASCADES / HIGH CASCADES / CALIFORNIA / LASSEN VOLCANIC CENTER	SOUTHERNMOST CASCADES, CINDER PIT WEST MAGEE MOUNTAIN	40.7141	40.7141	-121.681	-121.681	SAE			s_LB92-168 [3657]	ANDESITE, BASALTIC [3657] / BASALT, CALC-ALKALINE [4943]	Quaternary									VOL					WR [3657]	53.45	0.61		16.84		1.67	6	7.5	9.81	7.65	0.14		0.83	2.87	0.13
CASCADES 38.8-1.9.csv	[3657][4943]	3 Cascades	Lassen	Lassen	29	8	S Cascades	CASCADES / HIGH CASCADES / CALIFORNIA / LASSEN VOLCANIC CENTER	SOUTHERNMOST CASCADES, HORSE HAVEN BUTTE	40.725	40.725	-121.66	-121.66	SAE			s_LB92-167 [3657]	ANDESITE, BASALTIC [3657] / BASALT, CALC-ALKALINE [4943]	Quaternary									VOL					WR [3657]	53.09	0.65		16.26		1.62	5.82	7.28	11.15	8.15	0.14		0.32	2.69	0.13
CASCADES 38.8-1.9.csv	[4450][2261][4943]	3 Cascades	Lassen	Lassen	29	8	S Cascades	CASCADES / HIGH CASCADES / CALIFORNIA / LASSEN VOLCANIC CENTER	SOUTHERNMOST CASCADES	40.6679	40.6679	-121.751	-121.751	SAE			s_LC86-1005 [4450]	ANDESITE, BASALTIC [4450] / NOT GIVEN [2261] / BASALT, CALC-ALKALINE [4943]	Holocene		500000 [4450]							VOL					WR [4450]	51.3	0.52		15.7		1.7	6.36		10.7	11.1	0.14		0.317	2.45	0.08
CASCADES 38.8-1.9.csv	[3657][4943]	3 Cascades	Lassen	Lassen	29	8	S Cascades	CASCADES / HIGH CASCADES / CALIFORNIA / LASSEN VOLCANIC CENTER	SOUTHERNMOST CASCADES	40.7012	40.7012	-121.723	-121.723	SAE			s_LB92-166 [3657]	ANDESITE, BASALTIC [3657] / BASALT, CALC-ALKALINE [4943]	Holocene		500000 [3657]							VOL					WR [3657]	51.09	0.57		16.36		1.68	6.03	7.54	10.07	11.06	0.14		0.31	2.56	0.13
CASCADES 38.8-1.9.csv	[4450][20728][2261]	3 Cascades	Lassen	Lassen	29	8	S Cascades	CASCADES / HIGH CASCADES / CALIFORNIA / LASSEN VOLCANIC CENTER	SOUTHERNMOST CASCADES	40.3396	40.3396	-122.051	-122.051	SAE			s_LC88-1312 [4450]	ANDESITE, BASALTIC [4450] / BASALT, CALC-ALKALINE [20728] / NOT GIVEN [2261]	Holocene		500000 [4450]							VOL					WR [4450]	50.8	0.73		16.6		1.22	6.48		11	9.97	0.15		0.299	2.48	0.1
CASCADES 38.8-1.9.csv	[3657][2261][4943]	3 Cascades	Lassen	Lassen	29	8	S Cascades	CASCADES / HIGH CASCADES / CALIFORNIA / LASSEN VOLCANIC CENTER	SOUTHERNMOST CASCADES, RED LAKE MOUNTAIN	40.5789	40.5789	-121.561	-121.561	SAE			s_LC83-255 [3657]	ANDESITE [3657] / BASALT, CALC-ALKALINE [4943]	70000 [2261]		500000 [3657] / 70000 [2261]							VOL					WR [3657]	54.49	0.85		17.07		1.4	5.05	6.31	8.98	7.73	0.1		0.63	3.47	0.23
CASCADES 38.8-1.9.csv	[3657][4943]	3 Cascades	Lassen	Lassen	29	8	S Cascades	CASCADES / HIGH CASCADES / CALIFORNIA / LASSEN VOLCANIC CENTER	SOUTHERNMOST CASCADES, COLD CREEK BUTTE	40.3432	40.3432	-121.644	-121.644	SAE			s_LM92-2443 [3657]	ANDESITE, BASALTIC [3657] / BASALT, CALC-ALKALINE [4943]	10000 [3657]		10000 [3657]							VOL					WR [3657]	51.2	1.13		17.3		1.86	6.68	8.36	8.97	8.15	0.16		0.85	3.38	0.32
CASCADES 38.8-1.9.csv	[15673][3657][2261][4943]	3 Cascades	Lassen	Lassen	29	8	S Cascades	CASCADES / HIGH CASCADES / CALIFORNIA / LASSEN VOLCANIC CENTER	SOUTHERNMOST CASCADES, POISON LAKE CHAIN, OLD RAILROAD GRADE, PEAK 1791	40.6494	40.6494	-121.227	-121.227	SAE			s_LC86-829 [15673]	BASALT [15673] / ANDESITE, BASALTIC [3657] / BASALT, CALC-ALKALINE [4943]	1370000 [2261]		500000 [3657] / 1370000 [2261]	LOWER [15673]	PLEISTOCENE [15673]					VOL					WR [15673]	51.51	0.71		17.24		1.63	5.87	7.33	10.42	9.2	0.13		0.61	2.57	0.12
CASCADES 38.8-1.9.csv	[15673][3657][4450][20728][2261]	3 Cascades	Lassen	Lassen	29	8	S Cascades	CASCADES / HIGH CASCADES / CALIFORNIA / LASSEN VOLCANIC CENTER	SOUTHERNMOST CASCADES, POISON LAKE CHAIN, ROBBERS SPRING	40.645	40.645	-121.166	-121.166	SAE			s_LC85-671 [15673]	BASALT [15673] / ANDESITE, BASALTIC [3657] / BASALT, CALC-ALKALINE [20728] / NOT GIVEN [2261]	430000 [3657]		430000 [3657] / 500000 [4450]	LOWER [15673]	PLEISTOCENE [15673]					VOL					WR [15673]	51.35	1.19		17.02		1.88	6.76	8.45	9.14	8.05	0.15		1.02	3.14	0.3
CASCADES 38.8-1.9.csv	[15673][3657][4450][20728][2261]	3 Cascades	Lassen	Lassen	29	8	S Cascades	CASCADES / HIGH CASCADES / CALIFORNIA / LASSEN VOLCANIC CENTER	SOUTHERNMOST CASCADES	40.539	40.539	-121.162	-121.162	SAE			s_LC82-905 [15673]	BASALT [15673] / ANDESITE, BASALTIC [3657] / BASALT, CALC-ALKALINE [20728] / NOT GIVEN [2261]	Pleistocene			LOWER [15673]	PLEISTOCENE [15673]					VOL					WR [15673]	50.36	0.99		17.73		1.87	6.74	8.43	9.79	8.43	0.16		0.65	3.02	0.25
CASCADES 38.8-1.9.csv	[3657][4450][20728]	3 Cascades	Lassen	Lassen	29	8	S Cascades	CASCADES / HIGH CASCADES / CALIFORNIA / LASSEN VOLCANIC CENTER	SOUTHERNMOST CASCADES	40.5347	40.5347	-121.196	-121.196	SAE			s_LM87-1384 [3657]	BASALT [3657] / ANDESITE, BASALTIC [4450] / BASALT, CALC-ALKALINE [20728]	Quaternary									VOL					WR [3657]	49.64	1.32		15.56		1.84	6.63	8.28	9.78	10.67	0.15		0.92	3.03	0.46
CASCADES 38.8-1.9.csv	[15673][3657]	3 Cascades	Lassen	Lassen	29	8	S Cascades	CASCADES / HIGH CASCADES / CALIFORNIA / LASSEN VOLCANIC CENTER	SOUTHERNMOST CASCADES, POISON LAKE CHAIN, CONE LAKE ROAD	40.5722	40.5722	-121.184	-121.184	SAE			s_LC86-834 [15673]	BASALT [15673]	430000 [3657]	430000 [3657]	430000 [3657]	LOWER [15673]	PLEISTOCENE [15673]					VOL					WR [15673]	49.38	0.92		16.59		1.96	7.05	8.81	10.06	10.46	0.16		0.53	2.68	0.22
CASCADES 38.8-1.9.csv	[4450][20728]	3 Cascades	Lassen	Lassen	29	8	S Cascades	CASCADES / HIGH CASCADES / CALIFORNIA / LASSEN VOLCANIC CENTER	SOUTHERNMOST CASCADES	40.4222	40.4222	-121.985	-121.985	SAE			s_LC86-1046 [4450]	THOLEIITE, OLIVINE [4450]	Quaternary									VOL					WR [4450]	48.2	0.8		17.4		1.81	7.46		11.4	10.1	0.17		0.138	2.55	0.09
CASCADES 38.8-1.9.csv	[3657][4943]	3 Cascades	Lassen	Lassen	29	8	S Cascades	CASCADES / HIGH CASCADES / CALIFORNIA / LASSEN VOLCANIC CENTER	HORN MOUNTAIN	40.492	40.492	-121.508	-121.508	SAE			s_LB91-125 [3657]	BASALT [3657] / BASALT, CALC-ALKALINE [4943]	Pliocene to Holocene									VOL					WR [3657]	50.77	1.52		17.03		2.09	7.51	9.39	9.11	6.54	0.17		1.21	3.38	0.67
CASCADES 38.8-1.9.csv	[3657][4943]	3 Cascades	Lassen	Lassen	29	8	S Cascades	CASCADES / HIGH CASCADES / CALIFORNIA / LASSEN VOLCANIC CENTER	UNIDENTIFIED VENTS	40.492	40.492	-121.508	-121.508	SAE			s_LC82-886 [3657]	ANDESITE, BASALTIC [3657] / BASALT, CALC-ALKALINE [4943]	430000 [3657]	430000 [3657]	430000 [3657] / 500000 [4943]							VOL					WR [3657]	52.28	1.01		17.13		1.82	6.56	8.2	8.73	7.79	0.14		1.01	3.24	0.29
CASCADES 38.8-1.9.csv	[3657][4943]	3 Cascades	Lassen	Lassen	29	8	S Cascades	CASCADES / HIGH CASCADES / CALIFORNIA / LASSEN VOLCANIC CENTER	UNIDENTIFIED VENTS	40.492	40.492	-121.508	-121.508	SAE			s_LC83-347 [3657]	ANDESITE, BASALTIC [3657] / BASALT, CALC-ALKALINE [4943]	70000 [3657]	70000 [3657]	70000 [3657] / 500000 [4943]							VOL					WR [3657]	51.22	1.69		17.88		1.72	6.21	7.76	8.27	6.83	0.13		1.48	4.07	0.5
CASCADES 38.8-1.9.csv	[3657][4943]	3 Cascades	Lassen	Lassen	29	8	S Cascades	CASCADES / HIGH CASCADES / CALIFORNIA / LASSEN VOLCANIC CENTER	S. CARIBOU, MAIDU VOLCANIC CENTER	40.492	40.492	-121.508	-121.508	SAE			s_LC88-1329 [3657]	BASALT [3657] / BASALT, CALC-ALKALINE [4943]	70000 [3657]	70000 [3657]	70000 [3657]							VOL					WR [3657]	50.12	1.73		16.2		2.06	7.42	9.27	9.14	7.24	0.14		1.43	3.94	0.58
CASCADES 38.8-1.9.csv	[3657][4943]	3 Cascades	Lassen	Lassen	29	8	S Cascades	CASCADES / HIGH CASCADES / CALIFORNIA / LASSEN VOLCANIC CENTER	PEAK 6456	40.492	40.492	-121.508	-121.508	SAE			s_LB91-102 [3657]	BASALT [3657] / BASALT, CALC-ALKALINE [4943]	430000 [3657]	430000 [3657]	430000 [3657]							VOL					WR [3657]	50.71	1.56		16.97		1.88	6.76	8.44	7.82	8.81	0.15		1.32	3.61	0.42
CASCADES 38.8-1.9.csv	[3657][2261][4943]	3 Cascades	Lassen	Lassen	29	8	S Cascades	CASCADES / HIGH CASCADES / CALIFORNIA / LASSEN VOLCANIC CENTER	CLOVER BUTTE	40.492	40.492	-121.508	-121.508	SAE			s_LB91-105 [3657]	ANDESITE, BASALTIC [3657] / NOT GIVEN [2261] / BASALT, CALC-ALKALINE [4943]	430000 [3657]	430000 [3657]	430000 [3657] / 500000 [2261]							VOL					WR [3657]	52.09	0.92		16.83		1.69	6.09	7.61	8.85	8.91	0.14		1.11	3.07	0.31
CASCADES 38.8-1.9.csv	[3657][4943]	3 Cascades	Lassen	Lassen	29	8	S Cascades	CASCADES / HIGH CASCADES / CALIFORNIA / LASSEN VOLCANIC CENTER	COLD CREEK BUTTE	40.492	40.492	-121.508	-121.508	SAE			s_LB91-101 [3657]	ANDESITE, BASALTIC [3657] / BASALT, CALC-ALKALINE [4943]	430000 [3657]	430000 [3657]	430000 [3657]							VOL					WR [3657]	51.48	1.14		18.03		1.76	6.34	7.93	9.13	7.22	0.14		0.97	3.44	0.35
CASCADES 38.8-1.9.csv	[3657][4943]	3 Cascades	Lassen	Lassen	29	8	S Cascades	CASCADES / HIGH CASCADES / CALIFORNIA / LASSEN VOLCANIC CENTER	PEAK 5383	40.492	40.492	-121.508	-121.508	SAE			s_LB91-110 [3657]	BASALT [3657] / BASALT, CALC-ALKALINE [4943]	Quaternary									VOL					WR [3657]	50.12	0.75		16.5		1.98	7.14	8.92	10.77	8.86	0.12		0.93	2.68	0.16
CASCADES 38.8-1.9.csv	[4450][20728]	3 Cascades	Lassen	Lassen	29	8	S Cascades	CASCADES / HIGH CASCADES / CALIFORNIA / LASSEN VOLCANIC CENTER		40.015	40.015	-121.963	-121.963	SAE			s_LC88-1398 [4450]	ANDESITE, BASALTIC [4450] / BASALT, CALC-ALKALINE [20728]	Quaternary									VOL					WR [4450]	49.5	0.85		16.4		1.78	7.4		10.5	10.3	0.17		0.403	2.41	0.11
CASCADES 38.8-1.9.csv	[4450][20728]	3 Cascades	Lassen	Lassen	29	8	S Cascades	CASCADES / HIGH CASCADES / CALIFORNIA / LASSEN VOLCANIC CENTER		40.3907	40.3907	-121.305	-121.305	SAE			s_LC82-970 [4450]	THOLEIITE, OLIVINE [4450]	Quaternary									VOL					WR [4450]	48.4	0.96		17.4		1.68	7.76		11.2	9.79	0.17		0.172	2.68	0.1
CASCADES 38.8-1.9.csv	[4450][20728]	3 Cascades	Lassen	Lassen	29	8	S Cascades	CASCADES / HIGH CASCADES / CALIFORNIA / LASSEN VOLCANIC CENTER		40.32	40.32	-122.066	-122.066	SAE			s_LC88-1311 [4450]	THOLEIITE, OLIVINE [4450]	Quaternary									VOL					WR [4450]	48	0.81		18		2.35	6.63		11.2	9.34	0.16		0.157	2.52	0.09
CASCADES 38.8-1.9.csv	[4450][20728]	3 Cascades	Lassen	Lassen	29	8	S Cascades	CASCADES / HIGH CASCADES / CALIFORNIA / LASSEN VOLCANIC CENTER		40.5313	40.5313	-121.049	-121.049	SAE			s_LC86-855 [4450]	ANDESITE, BASALTIC [4450] / BASALT, CALC-ALKALINE [20728]	Quaternary									VOL					WR [4450]	49.5	1.34		16.7		3.66	5.8		9.79	8.19	0.15		0.83	3.25	0.28
CASCADES 38.8-1.9.csv	[3657][4450][20728][2261]	3 Cascades	Lassen	Lassen	29	8	S Cascades	CASCADES / HIGH CASCADES / CALIFORNIA / LASSEN VOLCANIC CENTER		40.7383	40.7383	-121.835	-121.835	SAE			s_LC86-1009 [3657]	ANDESITE [3657] / ANDESITE, BASALTIC [4450] / NOT GIVEN [20728]	1370000 [3657]	1370000 [3657]	1370000 [3657] / 500000 [4450]							VOL					WR [3657]	58.17	0.52		16		1.66	4.5	5.62	7.72	7.57	0.1		0.8	3.25	0.12
CASCADES 38.8-1.9.csv	[3755]	3 Cascades	Simcoe	Simcoe	30	9	C Cascades rear-arc	CASCADES / HIGH CASCADES / WASHINGTON / SIMCOE VOLCANIC FIELD		48	50	-120	-122	SAE			s_L83-92 [3755]	BASALT [3755]	Quaternary									VOL					WR [3755]	49.33	2.24		16.78				11.06	9.75	6.56	0.15		0.66	3.14	0.35
CASCADES 38.8-1.9.csv	[3755]	3 Cascades	Simcoe	Simcoe	30	9	C Cascades rear-arc	CASCADES / HIGH CASCADES / WASHINGTON / SIMCOE VOLCANIC FIELD		48	50	-120	-122	SAE			s_L83-65 [3755]	BASALT [3755]	Quaternary									VOL					WR [3755]	47.04	3.58		17.04				12.53	8.15	6.48	0.16		1.37	3.1	0.56
CASCADES 38.8-1.9.csv	[3755]	3 Cascades	Simcoe	Simcoe	30	9	C Cascades rear-arc	CASCADES / HIGH CASCADES / WASHINGTON / SIMCOE VOLCANIC FIELD		48	50	-120	-122	SAE			s_L83-67 [3755]	BASALT [3755]	Quaternary									VOL					WR [3755]	50.48	2.25		16.43				10.55	7.2	6.06	0.16		2	4.13	0.74
CASCADES 38.8-1.9.csv	[4450][20728]	3 Cascades	Simcoe	Simcoe	30	9	C Cascades rear-arc	CASCADES / HIGH CASCADES / WASHINGTON / SIMCOE VOLCANIC FIELD		45.9765	45.9765	-120.955	-120.955	SAE			s_SM-27 [4450]	BASALT, ALKALINE [4450]	Quaternary									VOL					WR [4450]	49	2.28		16.3		4.66	6.25		7.33	6.28	0.15		2.254	4.17	0.9
CASCADES 38.8-1.9.csv	[3755][7186][4190]	3 Cascades	Simcoe	Simcoe	30	9	C Cascades rear-arc	CASCADES / HIGH CASCADES / WASHINGTON / SIMCOE VOLCANIC FIELD		45.905	45.905	-120.711	-120.711	SAE			s_L83-94 [3755]	BASALT [3755]	Quaternary									VOL					WR [3755]	49.14	2.57		15.5				11.99	9.39	6.88	0.16		0.76	3.22	0.39
CENTRAL_AMERICAN_VOLCANIC_ARC 28-7.csv	[16047]	2(4) Guatemala rear-arc	Pacaya	Pacaya	31	10	Guatemala/Salvador	CENTRAL AMERICAN VOLCANIC ARC / CENTRAL AMERICAN VOLCANIC ARC-NORTHWESTERN SEGMENT / GUATEMALA / PACAYA		14.409	14.409	-90.6153	-90.6153	SAE			s_GU2A [16047]	BASALT, CALC-ALKALINE [16047]	Quaternary									VOL			F		WR [16047]	48.12	1.05		17.89				10.8	9.54	6.76	0.18		0.59	2.54	0.21	0.32
CENTRAL_AMERICAN_VOLCANIC_ARC 28-7.csv	[5025][13434][4794]	2(4) Guatemala rear-arc	Cuilapa-Barbarena	Cuilapa-Barbarena	32	10	Guatemala/Salvador	CENTRAL AMERICAN VOLCANIC ARC / CENTRAL AMERICAN VOLCANIC ARC-NORTHWESTERN SEGMENT / GUATEMALA	CERRO DEL CEMETERIO BRITO, SOUTHEASTERN GUATEMALA TRANSECT (BEHIND-THE-FRONT VOLCANISM)	14.35	14.35	-90.34	-90.34	SAE			s_GUC303 [5025]	NOT GIVEN [5025]	Quaternary				QUATERNARY [13434]					VOL					WR [5025]	49.9	1.36		16.5				8.96	9.8	7.68	0.16		1.17	3.23	0.3
CENTRAL_AMERICAN_VOLCANIC_ARC 28-7.csv	[16047]	2(4) Guatemala rear-arc	Cuilapa-Barbarena	Cuilapa-Barbarena	32	10	Guatemala/Salvador	CENTRAL AMERICAN VOLCANIC ARC / CENTRAL AMERICAN VOLCANIC ARC-NORTHWESTERN SEGMENT / GUATEMALA	BARBERENA - CUILAPA (BEHIND-THE-FRONT VOLCANISM)	14.2942	14.2942	-90.341	-90.341	SAE			s_GU14A [16047]	BASALT, CALC-ALKALINE [16047]	Quaternary									VOL			F		WR [16047]	49.89	1.34		18.45				9.32	9.94	6.08	0.16		0.6	3.6	0.26	0.26
CENTRAL_AMERICAN_VOLCANIC_ARC 28-7.csv	[11022][10875]	5 Salvador	Apaneca	Apaneca	33	10	Guatemala/Salvador	CENTRAL AMERICAN VOLCANIC ARC / CENTRAL AMERICAN VOLCANIC ARC-NORTHWESTERN SEGMENT / EL SALVADOR / AHUACHAPAN / SAN SALVADOR FORMATION	AHUACHAPAN (CERRO DE APANECA)	13.8408	13.8408	-89.8097	-89.8097	SAE			s_ES 42 [11022]	NOT GIVEN [11022] / BASALT [10875]	Pleistocene			UPPER [10875]	PLEISTOCENE [10875]					VOL					WR [11022]	47.72	1.08		17.29		4.35	7.74		10.1	6.91	0.19		0.6	2.62	0.15
CENTRAL_AMERICAN_VOLCANIC_ARC 28-7.csv	[16047]	5 Salvador	San Miguel	San Miguel	34	10	Guatemala/Salvador	CENTRAL AMERICAN VOLCANIC ARC / CENTRAL AMERICAN VOLCANIC ARC-NORTHWESTERN SEGMENT / EL SALVADOR / SAN MIGUEL(CHAPARRASTIQUE)		13.5028	13.5028	-88.2217	-88.2217	SAE			s_ES027B [16047]	BASALT, CALC-ALKALINE [16047]	Quaternary									VOL			F		WR [16047]	50.19	0.81		18.62				9.92	10.1	6.22	0.18		0.53	2.47	0.15	0.46
CENTRAL_AMERICAN_VOLCANIC_ARC 28-7.csv	[20726]	5 Salvador	San Miguel	San Miguel	34	10	Guatemala/Salvador	CENTRAL AMERICAN VOLCANIC ARC / CENTRAL AMERICAN VOLCANIC ARC-NORTHWESTERN SEGMENT / EL SALVADOR / SAN MIGUEL(CHAPARRASTIQUE)	DECEMBER 29, 2013 ERUPTION	13.433	13.433	-88.267	-88.267	SAE			s_CH2 [20726]	BASALT [20726]	recent									VOL					WR [20726]	51.52	0.905		16.29		2.03768	6.4		10.7533	6.22	0.21		0.854431	2.20728	0.12
CENTRAL_AMERICAN_VOLCANIC_ARC 28-7.csv	[20035]	5 Salvador	Tigre	Tigre	35	10	Guatemala/Salvador	CENTRAL AMERICAN VOLCANIC ARC / CENTRAL AMERICAN VOLCANIC ARC-NORTHWESTERN SEGMENT / HONDURAS / ISLA EL TIGRE	PLAYA GRANDE	13.2682	13.2682	-87.6578	-87.6578	SAE			s_TIG 5 [20035]	BASALT [20035]	Quaternary									VOL					WR [20035]	50.26	0.863		18.53				9.86	9.98	6.29	0.186		0.81	2.91	0.25
CENTRAL_AMERICAN_VOLCANIC_ARC 28-7.csv	[16047]	3(5) Salvador rear-arc	Guazapa	Guazapa	36	11	Guatemala/Salvador rear-arc	CENTRAL AMERICAN VOLCANIC ARC / CENTRAL AMERICAN VOLCANIC ARC-NORTHWESTERN SEGMENT / EL SALVADOR	CINDER CONE CLOSE TO CERRITO OJO DE AGUA (BEHIND-THE-FRONT VOLCANISM)	13.8572	13.8572	-89.2287	-89.2287	SAE			s_ES013 [16047]	BASALT, CALC-ALKALINE [16047]	Quaternary									VOL			F		WR [16047]	50.78	0.95		17.24				8.77	9.76	6.86	0.16		0.72	2.78	0.25	0.52
CENTRAL_AMERICAN_VOLCANIC_ARC 28-7.csv	[16047]	3(5) Salvador rear-arc	Singuil	Singuil	37	11	Guatemala/Salvador rear-arc	CENTRAL AMERICAN VOLCANIC ARC / CENTRAL AMERICAN VOLCANIC ARC-NORTHWESTERN SEGMENT / EL SALVADOR / EL SINGUIL (SINGÜIL)	BEHIND-THE-FRONT VOLCANISM	14.0488	14.0488	-89.6317	-89.6317	SAE			s_ES024B [16047]	BASALT, CALC-ALKALINE [16047]	Quaternary									VOL			F		WR [16047]	49.24	1.09		17.11				9.08	9.6	7.6	0.16		0.84	3.01	0.25	0.41
CENTRAL_AMERICAN_VOLCANIC_ARC 28-7.csv	[11022][10875]	3(5) Salvador rear-arc	Singuil	Singuil	37	11	Guatemala/Salvador rear-arc	CENTRAL AMERICAN VOLCANIC ARC / CENTRAL AMERICAN VOLCANIC ARC-NORTHWESTERN SEGMENT / EL SALVADOR / AHUACHAPAN / SAN SALVADOR FORMATION	AHUACHAPAN (CHALCHUAPA)	14.0443	14.0443	-89.6997	-89.6997	SAE			s_ES 55 [11022]	NOT GIVEN [11022] / BASALT [10875]	Pleistocene			UPPER [10875]	PLEISTOCENE [10875]					VOL					WR [11022]	49.64	1.25		17.3		1.27	7.56		8.95	7.32	0.15		1.2	3.36	0.33
CENTRAL_AMERICAN_VOLCANIC_ARC 28-7.csv	[11022][10875]	3(5) Salvador rear-arc	Singuil	Singuil	37	11	Guatemala/Salvador rear-arc	CENTRAL AMERICAN VOLCANIC ARC / CENTRAL AMERICAN VOLCANIC ARC-NORTHWESTERN SEGMENT / EL SALVADOR / AHUACHAPAN / SAN SALVADOR FORMATION	AHUACHAPAN (LA MAGDALENA)	14.0597	14.0597	-89.7058	-89.7058	SAE			s_ES 57 [11022]	NOT GIVEN [11022] / BASALT [10875]	Pleistocene			UPPER [10875]	PLEISTOCENE [10875]					VOL					WR [11022]	48.41	1.31		16.64		6.38	3.05		9.42	8.27	0.15		1.08	3.09	0.32
CENTRAL_AMERICAN_VOLCANIC_ARC 28-7.csv	[16047]	2(4) Guatemala rear-arc	Chiquimula Volcanic Field	Chiquimula Volcanic Field	38	11	Guatemala/Salvador rear-arc	CENTRAL AMERICAN VOLCANIC ARC / CENTRAL AMERICAN VOLCANIC ARC-NORTHWESTERN SEGMENT / GUATEMALA	CONACASTE TOWN (BEHIND-THE-FRONT VOLCANISM)	14.8566	14.8566	-89.596	-89.596	SAE			s_GU29 [16047]	BASALT, CALC-ALKALINE [16047]	Quaternary									VOL			F		WR [16047]	50.49	1.33		17.48				8.61	8.82	6.23	0.16		1.04	3.56	0.32	0.25
CENTRAL_AMERICAN_VOLCANIC_ARC 28-7.csv	[16047]	2(4) Guatemala rear-arc	Los Gemelos	Los Gemelos	39	11	Guatemala/Salvador rear-arc	CENTRAL AMERICAN VOLCANIC ARC / CENTRAL AMERICAN VOLCANIC ARC-NORTHWESTERN SEGMENT / GUATEMALA	LOS GEMELOZ (BEHIND-THE-FRONT VOLCANISM)	14.5953	14.5953	-89.646	-89.646	SAE			s_GU35B [16047]	BASALT, CALC-ALKALINE [16047]	Quaternary									VOL			F		WR [16047]	49.67	1.21		17.92				9.15	9.58	7.23	0.16		0.83	3.23	0.35	0.5
CENTRAL_AMERICAN_VOLCANIC_ARC 28-7.csv	[16047]	2(4) Guatemala rear-arc	Gordo	Gordo	40	11	Guatemala/Salvador rear-arc	CENTRAL AMERICAN VOLCANIC ARC / CENTRAL AMERICAN VOLCANIC ARC-NORTHWESTERN SEGMENT / GUATEMALA	CERRO GORDO, W CONE (BEHIND-THE-FRONT VOLCANISM)	14.4427	14.4427	-89.611	-89.611	SAE			s_GU38 [16047]	BASALT, CALC-ALKALINE [16047]	Quaternary									VOL			F		WR [16047]	50.41	1.12		17.54				9.21	9.69	6.92	0.17		1.49	2.94	0.39	0.3
CENTRAL_AMERICAN_VOLCANIC_ARC 28-7.csv	[4794][13434]	2(4) Guatemala rear-arc	Gordo	Gordo	40	11	Guatemala/Salvador rear-arc	CENTRAL AMERICAN VOLCANIC ARC / CENTRAL AMERICAN VOLCANIC ARC-NORTHWESTERN SEGMENT / GUATEMALA	CERRO GORDO, SOUTHEASTERN GUATEMALA TRANSECT (BEHIND-THE-FRONT VOLCANISM)	14.28	14.28	-89.92	-89.92	SAE			s_GUC702 [4794]	NOT GIVEN [4794]					QUATERNARY [13434]					VOL					WR [4794]	49.99	1.32		17.1				8.78	9.3	6.7	0.16		1.02	3.54	0.32
CENTRAL_AMERICAN_VOLCANIC_ARC 28-7.csv	[14081][6969]	3(5) Salvador rear-arc	Yojoa	Yojoa	41	11	Guatemala/Salvador rear-arc	CENTRAL AMERICAN VOLCANIC ARC / CENTRAL AMERICAN VOLCANIC ARC-NORTHWESTERN SEGMENT / HONDURAS / YOJOA	LAKE YOJOA	14.98	14.98	-87.98	-87.98	SAE			s_YO2 [14081]	NOT GIVEN [14081]	Quaternary for Yohoa and Utila									VOL					WR [14081]	48.41	1.94		17.32				8.87	8.7	7	0.15		1.65	3.64	0.52
CENTRAL_AMERICAN_VOLCANIC_ARC 28-7.csv	[14081][6969]	3(5) Salvador rear-arc	Yojoa	Yojoa	41	11	Guatemala/Salvador rear-arc	CENTRAL AMERICAN VOLCANIC ARC / CENTRAL AMERICAN VOLCANIC ARC-NORTHWESTERN SEGMENT / HONDURAS / YOJOA	LAKE YOJOA	14.98	14.98	-87.98	-87.98	SAE			s_YO3 [14081]	NOT GIVEN [14081]	Quaternary for Yohoa and Utila									VOL					WR [14081]	49.13	1.77		16.88				8.84	8.53	6.84	0.16		1.53	3.91	0.52
CENTRAL_AMERICAN_VOLCANIC_ARC 28-7.csv	[14081]	6 Nicaragua	Telica	Telica	42	12	Nicarugua	CENTRAL AMERICAN VOLCANIC ARC / CENTRAL AMERICAN VOLCANIC ARC-NORTHWESTERN SEGMENT / NICARAGUA / TELICA		12.6	12.6	-86.85	-86.85	SAE			s_TE7 [14081]	NOT GIVEN [14081]	Quaternary									VOL					WR [14081]	51	1.44		16.8				9.96	10.3	6.23	0.16		0.88	2.83	0.14
CENTRAL_AMERICAN_VOLCANIC_ARC 28-7.csv	[14081]	6 Nicaragua	Telica	Telica	42	12	Nicarugua	CENTRAL AMERICAN VOLCANIC ARC / CENTRAL AMERICAN VOLCANIC ARC-NORTHWESTERN SEGMENT / NICARAGUA / TELICA		12.6	12.6	-86.85	-86.85	SAE			s_TE124 [14081]	NOT GIVEN [14081]										VOL					WR [14081]	50.53	1.47		17				9.94	10.38	6.25	0.16		0.87	2.74	0.17
CENTRAL_AMERICAN_VOLCANIC_ARC 28-7.csv	[14081][3439][20997][3474][2492]	6 Nicaragua	Telica	Telica	42	12	Nicarugua	CENTRAL AMERICAN VOLCANIC ARC / CENTRAL AMERICAN VOLCANIC ARC-NORTHWESTERN SEGMENT / NICARAGUA / TELICA		12.6	12.6	-86.85	-86.85	SAE			s_TE6 [14081] / s_NITE6 [3439] / s_NIC-TE6 [20997] / s_TE-6 [2492]	NOT GIVEN [14081] / BASALT [2492]										VOL					WR [14081]	50.3	1.44		16.6				10.17	10.3	6.46	0.16		0.88	2.83	0.19
CENTRAL_AMERICAN_VOLCANIC_ARC 28-7.csv	[14081]	6 Nicaragua	Negro	Negro	43	12	Nicarugua	CENTRAL AMERICAN VOLCANIC ARC / CENTRAL AMERICAN VOLCANIC ARC-NORTHWESTERN SEGMENT / NICARAGUA / CERRO NEGRO		12.5	12.5	-86.7	-86.7	SAE			s_CN001 [14081]	NOT GIVEN [14081]	Quaternary									VOL					WR [14081]	48.65	0.72		17.56				11.29	11.49	7.09	0.19		0.4	1.87	0.11
CENTRAL_AMERICAN_VOLCANIC_ARC 28-7.csv	[16047]	6 Nicaragua	Negro	Negro	43	12	Nicarugua	CENTRAL AMERICAN VOLCANIC ARC / CENTRAL AMERICAN VOLCANIC ARC-NORTHWESTERN SEGMENT / NICARAGUA / CERRO NEGRO	NW NICARAGUA VOLCANIC FRONT	12.5105	12.5105	-86.7075	-86.7075	SAE			s_P2-13 [16047]	BASALT, CALC-ALKALINE [16047]	Quaternary									VOL			F		WR [16047]	48.46	0.72		16.32				10.35	11.29	7.43	0.2		0.46	2.12	0.12	0.19
CENTRAL_AMERICAN_VOLCANIC_ARC 28-7.csv	[4519][4688][3439][20997][6969]	6 Nicaragua	Negro	Negro	43	12	Nicarugua	CENTRAL AMERICAN VOLCANIC ARC / CENTRAL AMERICAN VOLCANIC ARC-NORTHWESTERN SEGMENT / NICARAGUA / CERRO NEGRO		12.5	12.5	-86.7	-86.7	SAE			s_CN-10 [4519] / s_CN10 [4688] / s_NICN10 [3439] / s_NIC-CN10 [20997]	BASALT [4519] / NOT GIVEN [3439]								1947		VOL					WR [4519]	49.4	0.73		18.8				10.4	11.9	6	0.19		0.37	2	0.11	0.18
CENTRAL_AMERICAN_VOLCANIC_ARC 28-7.csv	[14081][4519]	6 Nicaragua	Negro	Negro	43	12	Nicarugua	CENTRAL AMERICAN VOLCANIC ARC / CENTRAL AMERICAN VOLCANIC ARC-NORTHWESTERN SEGMENT / NICARAGUA / CERRO NEGRO		12.5	12.5	-86.7	-86.7	SAE			s_CN5 [14081] / s_CN-5 [4519]	NOT GIVEN [14081] / BASALT [4519]	Quaternary									VOL					WR [14081]	48.9	0.65		15.3				10.8	11.5	9.59	0.2		0.35	1.85	0.11
CENTRAL_AMERICAN_VOLCANIC_ARC 28-7.csv	[16047]	6 Nicaragua	Diabolo	Negro	43	12	Nicarugua	CENTRAL AMERICAN VOLCANIC ARC / CENTRAL AMERICAN VOLCANIC ARC-NORTHWESTERN SEGMENT / NICARAGUA / CERRO DIABOLO	NW NICARAGUA VOLCANIC FRONT	12.4726	12.4726	-86.7236	-86.7236	SAE			s_P-50 [16047]	BASALT, CALC-ALKALINE [16047]	Quaternary									VOL			F		WR [16047]	49.9	0.71		17.33				9.56	12.64	6.41	0.18		0.6	1.93	0.16	0.3
CENTRAL_AMERICAN_VOLCANIC_ARC 28-7.csv	[16047]	6 Nicaragua	Diabolo	Negro	43	12	Nicarugua	CENTRAL AMERICAN VOLCANIC ARC / CENTRAL AMERICAN VOLCANIC ARC-NORTHWESTERN SEGMENT / NICARAGUA	CONE2; NW NICARAGUA VOLCANIC FRONT	12.4696	12.4696	-86.7232	-86.7232	SAE			s_P-51 [16047]	BASALT, CALC-ALKALINE [16047]	Quaternary									VOL			F		WR [16047]	49.98	0.72		17.18				9.54	12.71	6.53	0.18		0.59	1.92	0.16	0.34
CENTRAL_AMERICAN_VOLCANIC_ARC 28-7.csv	[16047]	6 Nicaragua	Las Pilas	Negro	43	12	Nicarugua	CENTRAL AMERICAN VOLCANIC ARC / CENTRAL AMERICAN VOLCANIC ARC-NORTHWESTERN SEGMENT / NICARAGUA	LAS PILAS;NW NICARAGUA VOLCANIC FRONT	12.4933	12.4933	-86.6861	-86.6861	SAE			s_P-19 [16047]	BASALT, CALC-ALKALINE [16047]	Quaternary									VOL			F		WR [16047]	51.28	0.84		16.05				9.48	10.86	6.06	0.18		0.81	2.38	0.18	0.24
CENTRAL_AMERICAN_VOLCANIC_ARC 28-7.csv	[16047]	6 Nicaragua	CABEZA DE VACA	Negro	43	12	Nicarugua	CENTRAL AMERICAN VOLCANIC ARC / CENTRAL AMERICAN VOLCANIC ARC-NORTHWESTERN SEGMENT / NICARAGUA	CABEZA DE VACA; NW NICARAGUA VOLCANIC FRONT	12.5195	12.5195	-86.6815	-86.6815	SAE			s_P-40A [16047]	BASALT, CALC-ALKALINE [16047]	Quaternary									VOL			F		WR [16047]	47.39	0.71		17.55				11.15	12.25	7.81	0.19		0.36	1.63	0.09	0.26
CENTRAL_AMERICAN_VOLCANIC_ARC 28-7.csv	[16047]	6 Nicaragua	CABEZA DE VACA	Negro	43	12	Nicarugua	CENTRAL AMERICAN VOLCANIC ARC / CENTRAL AMERICAN VOLCANIC ARC-NORTHWESTERN SEGMENT / NICARAGUA	CABEZA DE VACA; NW NICARAGUA VOLCANIC FRONT	12.5198	12.5198	-86.6807	-86.6807	SAE			s_P-42 [16047]	BASALT, CALC-ALKALINE [16047]	Quaternary									VOL			F		WR [16047]	48.22	0.74		16.31				11.34	10.9	8.46	0.2		0.49	1.77	0.1	0.32
CENTRAL_AMERICAN_VOLCANIC_ARC 28-7.csv	[14081]	6 Nicaragua	Nejapa	Nejapa	44	12	Nicarugua	CENTRAL AMERICAN VOLCANIC ARC / CENTRAL AMERICAN VOLCANIC ARC-NORTHWESTERN SEGMENT / NICARAGUA / NEJAPA		12.109	12.109	-86.32	-86.32	SAE			s_NE1 [14081]	NOT GIVEN [14081]	Quaternary									VOL					WR [14081]	48.4	0.79		18.5				10.87	11.86	6.04	0.2		0.4	2.12	0.09
CENTRAL_AMERICAN_VOLCANIC_ARC 28-7.csv	[15875]	6 Nicaragua	Nejapa	Nejapa	44	12	Nicarugua	CENTRAL AMERICAN VOLCANIC ARC / CENTRAL AMERICAN VOLCANIC ARC-NORTHWESTERN SEGMENT / NICARAGUA / NEJAPA	NEJAPA-MIRAFLORES LINEAMENT	12.11	12.11	-86.32	-86.32	SAE			s_416 [15875]	NOT GIVEN [15875]	<25ka									VOL					WR [15875]	52.1428	1.79974		15.2431				10.11	9.1578	6.44327	0.159093		0.437506	2.983	0.198866
CENTRAL_AMERICAN_VOLCANIC_ARC 28-7.csv	[15875]	6 Nicaragua	Nejapa	Nejapa	44	12	Nicarugua	CENTRAL AMERICAN VOLCANIC ARC / CENTRAL AMERICAN VOLCANIC ARC-NORTHWESTERN SEGMENT / NICARAGUA / NEJAPA	NEJAPA-MIRAFLORES LINEAMENT	12.11	12.11	-86.32	-86.32	SAE			s_851 [15875]	NOT GIVEN [15875]	<25ka									VOL					WR [15875]	47.7194	0.870684		16.1967				9.32	12.8426	9.57752	0.158306		0.227565	1.79084	0.0989413
CENTRAL_AMERICAN_VOLCANIC_ARC 28-7.csv	[15875]	6 Nicaragua	Nejapa	Nejapa	44	12	Nicarugua	CENTRAL AMERICAN VOLCANIC ARC / CENTRAL AMERICAN VOLCANIC ARC-NORTHWESTERN SEGMENT / NICARAGUA / NEJAPA	NEJAPA-MIRAFLORES LINEAMENT	12.11	12.11	-86.32	-86.32	SAE			s_839 [15875]	NOT GIVEN [15875]	<25ka									VOL					WR [15875]	48.8812	1.22327		16.2407				10	11.4272	8.11537	0.16907		0.33814	2.13824	0.16907
CENTRAL_AMERICAN_VOLCANIC_ARC 28-7.csv	[15875]	6 Nicaragua	Nejapa	Nejapa	44	12	Nicarugua	CENTRAL AMERICAN VOLCANIC ARC / CENTRAL AMERICAN VOLCANIC ARC-NORTHWESTERN SEGMENT / NICARAGUA / NEJAPA	NEJAPA-MIRAFLORES LINEAMENT	12.11	12.11	-86.32	-86.32	SAE			s_823 [15875]	NOT GIVEN [15875]	<25ka									VOL					WR [15875]	46.4037	1.04312		15.8256				11.36	11.1564	10.4709	0.188754		0.129148	1.90741	0.0894099
CENTRAL_AMERICAN_VOLCANIC_ARC 28-7.csv	[15875]	6 Nicaragua	Nejapa	Nejapa	44	12	Nicarugua	CENTRAL AMERICAN VOLCANIC ARC / CENTRAL AMERICAN VOLCANIC ARC-NORTHWESTERN SEGMENT / NICARAGUA / NEJAPA	NEJAPA-MIRAFLORES LINEAMENT	12.11	12.11	-86.32	-86.32	SAE			s_811 [15875]	NOT GIVEN [15875]	<25ka									VOL					WR [15875]	51.595	1.50585		15.4844				10.23	9.82762	6.73668	0.168417		0.416089	2.50644	0.168417
CENTRAL_AMERICAN_VOLCANIC_ARC 28-7.csv	[15875]	6 Nicaragua	Nejapa	Nejapa	44	12	Nicarugua	CENTRAL AMERICAN VOLCANIC ARC / CENTRAL AMERICAN VOLCANIC ARC-NORTHWESTERN SEGMENT / NICARAGUA / NEJAPA	NEJAPA-MIRAFLORES LINEAMENT	12.11	12.11	-86.32	-86.32	SAE			s_834 [15875]	NOT GIVEN [15875]	<25ka									VOL					WR [15875]	47.7903	0.822434		16.8748				9.92	12.3365	7.97662	0.188268		0.465715	2.18985	0.16845
CENTRAL_AMERICAN_VOLCANIC_ARC 28-7.csv	[15875]	6 Nicaragua	Nejapa	Nejapa	44	12	Nicarugua	CENTRAL AMERICAN VOLCANIC ARC / CENTRAL AMERICAN VOLCANIC ARC-NORTHWESTERN SEGMENT / NICARAGUA / NEJAPA	NEJAPA-MIRAFLORES LINEAMENT	12.11	12.11	-86.32	-86.32	SAE			s_858 [15875]	NOT GIVEN [15875]	<25ka									VOL					WR [15875]	47.3872	0.615935		14.6036				10.02	13.64	10.6596	0.188754		0.248361	1.26167	0.0894099
CENTRAL_AMERICAN_VOLCANIC_ARC 28-7.csv	[15875]	6 Nicaragua	Nejapa	Nejapa	44	12	Nicarugua	CENTRAL AMERICAN VOLCANIC ARC / CENTRAL AMERICAN VOLCANIC ARC-NORTHWESTERN SEGMENT / NICARAGUA / NEJAPA	NEJAPA-MIRAFLORES LINEAMENT	12.11	12.11	-86.32	-86.32	SAE			s_859 [15875]	NOT GIVEN [15875]	<25ka									VOL					WR [15875]	47.4998	0.693138		18.2988				10.72	12.4171	6.30756	0.198039		0.425785	1.9903	0.0990197
CENTRAL_AMERICAN_VOLCANIC_ARC 28-7.csv	[15875]	6 Nicaragua	Nejapa	Nejapa	44	12	Nicarugua	CENTRAL AMERICAN VOLCANIC ARC / CENTRAL AMERICAN VOLCANIC ARC-NORTHWESTERN SEGMENT / NICARAGUA / NEJAPA	NEJAPA-MIRAFLORES LINEAMENT	12.11	12.11	-86.32	-86.32	SAE			s_827 [15875]	NOT GIVEN [15875]	<25ka									VOL					WR [15875]	47.0582	0.721843		15.2378				10.01	13.8633	9.73005	0.187877		0.296648	1.50302	0.108771
CENTRAL_AMERICAN_VOLCANIC_ARC 28-7.csv	[15875]	6 Nicaragua	Nejapa	Nejapa	44	12	Nicarugua	CENTRAL AMERICAN VOLCANIC ARC / CENTRAL AMERICAN VOLCANIC ARC-NORTHWESTERN SEGMENT / NICARAGUA / NEJAPA	NEJAPA-MIRAFLORES LINEAMENT	12.11	12.11	-86.32	-86.32	SAE			s_815 A [15875]	NOT GIVEN [15875]	<25ka									VOL					WR [15875]	49.0914	0.740668		16.5416				10.62	12.2753	6.80427	0.197511		0.444401	1.83686	0.118507
CENTRAL_AMERICAN_VOLCANIC_ARC 28-7.csv	[4224][4688]	6 Nicaragua	Nejapa	Nejapa	44	12	Nicarugua	CENTRAL AMERICAN VOLCANIC ARC / CENTRAL AMERICAN VOLCANIC ARC-NORTHWESTERN SEGMENT / NICARAGUA / NEJAPA		12.109	12.109	-86.32	-86.32	SAE			s_CDP12 [4224]	NOT GIVEN [4224] / BASALT [4688]	Quaternary									VOL			F		WR [4224]	48.2	1.18		17.13				11.17	12	7.5	0.19		0.16	2.35	0.13
CENTRAL_AMERICAN_VOLCANIC_ARC 28-7.csv	[14081][4224]	6 Nicaragua	Nejapa	Nejapa	44	12	Nicarugua	CENTRAL AMERICAN VOLCANIC ARC / CENTRAL AMERICAN VOLCANIC ARC-NORTHWESTERN SEGMENT / NICARAGUA / NEJAPA		12.109	12.109	-86.32	-86.32	SAE			s_NE13 [14081]	NOT GIVEN [14081] / BASALT [4224]	Quaternary									VOL			F		WR [14081]	48.4	0.8		18.51				10.97	12.05	6.13	0.19		0.38	2.07	0.16
CENTRAL_AMERICAN_VOLCANIC_ARC 28-7.csv	[14081][4224]	6 Nicaragua	Nejapa	Nejapa	44	12	Nicarugua	CENTRAL AMERICAN VOLCANIC ARC / CENTRAL AMERICAN VOLCANIC ARC-NORTHWESTERN SEGMENT / NICARAGUA / NEJAPA		12.109	12.109	-86.32	-86.32	SAE			s_NE2 [14081]	NOT GIVEN [14081]	Quaternary									VOL			F		WR [14081]	47.4	0.77		18.3				11.2	11.9	6.23	0.2		0.28	1.95	0.12
CENTRAL_AMERICAN_VOLCANIC_ARC 28-7.csv	[4224][4688][6969]	6 Nicaragua	Nejapa	Nejapa	44	12	Nicarugua	CENTRAL AMERICAN VOLCANIC ARC / CENTRAL AMERICAN VOLCANIC ARC-NORTHWESTERN SEGMENT / NICARAGUA / NEJAPA		12.109	12.109	-86.32	-86.32	SAE			s_NE3 [4224]	NOT GIVEN [4224] / BASALT [4688]	Quaternary									VOL			F		WR [4224]	48.4	0.89		18.5				10.87	11.86	6.04	0.19		0.62	2.12	0.19
CENTRAL_AMERICAN_VOLCANIC_ARC 28-7.csv	[4224][4688][6969]	6 Nicaragua	Nejapa	Nejapa	44	12	Nicarugua	CENTRAL AMERICAN VOLCANIC ARC / CENTRAL AMERICAN VOLCANIC ARC-NORTHWESTERN SEGMENT / NICARAGUA / NEJAPA		12.109	12.109	-86.32	-86.32	SAE			s_NE6 [4224]	NOT GIVEN [4224] / BASALT [4688]	Quaternary									VOL			F		WR [4224]	47.2	0.7		14.8				10.3	13.3	8.68	0.18		0.4	1.58	0.1
CENTRAL_AMERICAN_VOLCANIC_ARC 28-7.csv	[3478][4224][3439][4048][4688][20997][6969]	6 Nicaragua	Granada	Granada	45	12	Nicarugua	CENTRAL AMERICAN VOLCANIC ARC / CENTRAL AMERICAN VOLCANIC ARC-NORTHWESTERN SEGMENT / NICARAGUA / GRANADA		11.97	11.97	-85.98	-85.98	SAE			s_GR3 [3478] / s_NIGR3 [3439] / s_NIC-GR3 [20997]	BASALT [3478] / NOT GIVEN [3439]	Quaternary									VOL			F		WR [3478]	48.6	1.26		16.4				11.2	12.1	6.96	0.18		0.14	2.4	0.12	0.19
CENTRAL_AMERICAN_VOLCANIC_ARC 28-7.csv	[4048][4688][3439][3474]	6 Nicaragua	Granada	Granada	45	12	Nicarugua	CENTRAL AMERICAN VOLCANIC ARC / CENTRAL AMERICAN VOLCANIC ARC-NORTHWESTERN SEGMENT / NICARAGUA / APOYO		11.5	12.5	-85	-86	SAE			s_AP3 [4048] / s_NIAP3 [3439]	BASALT [4048] / NOT GIVEN [3439]	Quaternary									VOL					WR [4048]	48	0.99		15.6				9.9	13.5	8.59	0.18		0.3	2.07	0.09
CENTRAL_AMERICAN_VOLCANIC_ARC 28-7.csv	[4102]	6 Nicaragua	Granada	Granada	45	12	Nicarugua	CENTRAL AMERICAN VOLCANIC ARC / CENTRAL AMERICAN VOLCANIC ARC-NORTHWESTERN SEGMENT / NICARAGUA	DISTANCE IN KM ALONG THE ARC FROM THE GUATEMALA-MEXICAN BORDER: 762.2 KM	11.88	11.88	-86	-86	SAE			s_GR101 [4102]	NOT GIVEN [4102]	Quaternary									VOL					WR [4102]	46.9	0.55		15.9				10.03	14.4	8.72	0.18		0.3	1.46	0.11
CENTRAL_AMERICAN_VOLCANIC_ARC 28-7.csv	[14915]	4(6) Nicaragua rear-arc	Cukra Hill	Cukra Hill	46	13	Nicarugua rear-arc	CENTRAL AMERICAN VOLCANIC ARC / CENTRAL AMERICAN VOLCANIC ARC-NORTHWESTERN SEGMENT / NICARAGUA / CUKRA HILL		12.3084	12.3084	-83.7183	-83.7183	SAE			s_CH-011507-9 [14915]	BASALT, ALKALINE [14915]	Pleistocene				PLEISTOCENE [14915]					VOL					WR [14915]	46.94	2.36		13.74				10.82	9.59	10.13	0.19		0.88	2.76	0.36
LESSER_ANTILLES 24.7-0.7.csv	[13520]	8 Lesser Antilles	GUADELOUPE	Soufriere	47	14	N Lesser Antilles	LESSER ANTILLES / LESSER ANTILLES / GUADELOUPE		16.008	16.008	-61.665	-61.665	SAE			s_GUAD510 [13520]	BASALT [13520]	~0.5Ma									VOL					WR [13520]	46.7	0.85		18.3				9.2	14.96	7.07	0.15		0.26	1.34	0.06
LESSER_ANTILLES 24.7-0.7.csv	[16072]	8 Lesser Antilles	SOUFRIERE HILLS	Soufriere	47	14	N Lesser Antilles	LESSER ANTILLES / LESSER ANTILLES / MONTSERRAT / SOUFRIERE HILLS		16.3764	16.3764	-61.577	-61.577	SAQ			s_KAH01 [16072]	NOT GIVEN [16072]	Quaternary									VOL	0.159	0.161			WR [16072]	50.643	0.8459		18.045				10.1	10.499	6.08	0.2245		0.417	2.407	0.165
LESSER_ANTILLES 24.7-0.7.csv	[16072]	8 Lesser Antilles	SOUFRIERE HILLS	Soufriere	47	14	N Lesser Antilles	LESSER ANTILLES / LESSER ANTILLES / MONTSERRAT / SOUFRIERE HILLS		16.9432	16.9432	-62.3447	-62.3447	SAE			s_RED01 [16072]	NOT GIVEN [16072]	Quaternary									VOL					WR [16072]	49.83	0.8188		19.209				9.9	10.453	6.113	0.1922		0.472	2.162	0.215
LESSER_ANTILLES 24.7-0.7.csv	[4856]	8 Lesser Antilles	Saba	Saba	48	14	N Lesser Antilles	LESSER ANTILLES / LESSER ANTILLES / SABA		17.63	17.63	-63.23	-63.23	SAE			s_SB55 [4856]	NOT GIVEN [4856]	0.21-0.42Ma									VOL					WR [4856]	51.4	0.76		17.1				7.95	10.2	7.37	0.18		0.62	2.81	0.18	0.7
LESSER_ANTILLES 24.7-0.7.csv	[4856]	8 Lesser Antilles	Saba	Saba	48	14	N Lesser Antilles	LESSER ANTILLES / LESSER ANTILLES / SABA		17.63	17.63	-63.23	-63.23	SAE			s_SB19A [4856]	NOT GIVEN [4856]	0.21-0.42Ma									VOL					WR [4856]	52	0.74		16.4				7.34	9.8	8.2	0.17		0.78	2.57	0.11	1.16
LESSER_ANTILLES 24.7-0.7.csv	[4856][5033]	8 Lesser Antilles	Saba	Saba	48	14	N Lesser Antilles	LESSER ANTILLES / LESSER ANTILLES / SABA	OLD BOOBY^S DOME	17.63	17.63	-63.23	-63.23	SAE			s_SB53 [4856]	NOT GIVEN [4856] / ANDESITE [5033]	<0.5Ma									VOL					WR [4856]	53.7	0.69		17.5				7.01	9.8	6.04	0.17		0.95	2.8	0.25	0.47
LESSER_ANTILLES 24.7-0.7.csv	[13520]	8 Lesser Antilles	Saba	Saba	48	14	N Lesser Antilles	LESSER ANTILLES / LESSER ANTILLES / SABA		17.645	17.645	-63.213	-63.213	SAE			s_LSS5 [13520]	ANDESITE, BASALTIC [13520]										VOL					WR [13520]	53.8	0.76		17.5				7.5	9.48	7.37	0.16		0.86	2.82	0.11
LESSER_ANTILLES 24.7-0.7.csv	[13520][22046][19156]	8 Lesser Antilles	Saba	Saba	48	14	N Lesser Antilles	LESSER ANTILLES / LESSER ANTILLES / SABA		17.647	17.647	-63.212	-63.212	SAE			s_LAS1 [13520]	BASALT [13520] / NOT GIVEN [19156]	<10ka									VOL					WR [13520]	51.4	0.79		17.1				7.42	10.3	8.01	0.16		0.67	2.7	0.1
LESSER_ANTILLES 24.7-0.7.csv	[9821]	8 Lesser Antilles	St. Kitts	St. Kitts	49	14	N Lesser Antilles	LESSER ANTILLES / LESSER ANTILLES / ST. KITTS / MOUNT LIAMUIGA		17.3948	17.3948	-62.7937	-62.7937	SAE			s_KIT59 [9821]	BASALT [9821]	Quaternary									VOL					WR [9821]	48.75	0.92		19.46				8.38	11.84	6.89	0.16		0.3	2.45	0.08
LESSER_ANTILLES 24.7-0.7.csv	[2494][13520]	8 Lesser Antilles	St. Kitts	St. Kitts	49	14	N Lesser Antilles	LESSER ANTILLES / LESSER ANTILLES / ST. KITTS		17.25	17.5	-62.6	-62.85	SAE			s_KB64 [2494]	BASALT [2494] / NOT GIVEN [13520]										VOL					WR [2494]	48.43	0.84		19.24				8.25	11.8	7	0.16		0.33	2.25	0.09
LESSER_ANTILLES 24.7-0.7.csv	[17114]	8 Lesser Antilles	Trois Ilets	Trois Ilets	50	15	S Lesser Antilles	LESSER ANTILLES / LESSER ANTILLES / MARTINIQUE / TROIS ILETS		14.496	14.496	-61.087	-61.087	SAE			s_06MT58 [17114]	ANDESITE, BASALTIC [17114]	400000 [17114]	400000 [17114]	400000 [17114]						PORPHYRIC [17114]	VOL					WR [17114]	56.4	0.54		16				6.25	9.65	6.03	0.15		0.77	2.67	0.09
LESSER_ANTILLES 24.7-0.7.csv	[17114][17164]	8 Lesser Antilles	Trois Ilets	Trois Ilets	50	15	S Lesser Antilles	LESSER ANTILLES / LESSER ANTILLES / MARTINIQUE / TROIS ILETS	TROIS ILETS PENINSULA, MORNE LA PLAINE	14.507	14.507	-61.062	-61.062	SAE			s_06MT61 [17114]	ANDESITE, BASALTIC [17114]	1175000 [17114]	1175000 [17114]	1175000 [17114]						PORPHYRIC [17114]	VOL					WR [17114]	54.4	0.55		15.3				7.47	9.8	7.9	0.17		0.64	2.34	0.11
LESSER_ANTILLES 24.7-0.7.csv	[17114][17164]	8 Lesser Antilles	Trois Ilets	Trois Ilets	50	15	S Lesser Antilles	LESSER ANTILLES / LESSER ANTILLES / MARTINIQUE / TROIS ILETS		14.533	14.533	-61.067	-61.067	SAE			s_IAR [17114]	BASALT [17114]	640000 [17114]	640000 [17114]	640000 [17114]						PORPHYRIC [17114]	VOL					WR [17114]	47.7	0.75		15.5				8.68	11.15	12.4	0.16		0.29	2.03	0.07
LESSER_ANTILLES 24.7-0.7.csv	[2494][7092]	8 Lesser Antilles	Grenadines	Grenadines	51	15	S Lesser Antilles	LESSER ANTILLES / LESSER ANTILLES / THE GRENADINES	ILE DE CAILLE	12.3	12.7	-61.5	-61.5	SAE			s_RW33 [2494]	BASALT [2494] / NOT GIVEN [7092]	1000 [2494]	1000 [2494]	1000 [2494]							VOL					WR [2494]	47.91	0.87		15.31				8.43	11.09	11.64	0.16		0.54	2.29	0.11
LESSER_ANTILLES 24.7-0.7.csv	[2494][13520]	8 Lesser Antilles	Grenadines	Grenadines	51	15	S Lesser Antilles	LESSER ANTILLES / LESSER ANTILLES / THE GRENADINES	ILE DE CAILLE	12.3	12.7	-61.5	-61.5	SAE			s_RW35 [2494] / s_RW 35 [13520]	BASALT [2494] / NOT GIVEN [13520]	1000 [2494]	1000 [2494]	1000 [2494]							VOL					WR [2494]	47.19	0.9		15.67				8.48	11.75	10.79	0.16		0.47	2.26	0.13
LESSER_ANTILLES 24.7-0.7.csv	[5712][13177][19156]	8 Lesser Antilles	St. Vincent	St. Vincent	52	15	S Lesser Antilles	LESSER ANTILLES / LESSER ANTILLES / ST. VINCENT / LA SOUFRIERE / PRE-SOMMA LAVA	BLACK POINT	13.2608	13.2608	-61.1175	-61.1175	SAE			s_STV301 [5712] / s_STV 301 [13177]	BASALT [5712] / NOT GIVEN [19156]	<0.6Ma									VOL					WR [5712] / GL [13177]	47.01	1.07		15.28		8.26	1.52	8.79	10.96	12.5	0.16		0.47	2.23	0.12	0.1
LESSER_ANTILLES 24.7-0.7.csv	[5712][4122]	8 Lesser Antilles	St. Vincent	St. Vincent	52	15	S Lesser Antilles	LESSER ANTILLES / LESSER ANTILLES / ST. VINCENT / LA SOUFRIERE / PRE-SOMMA LAVA	RABACCA RIVER, BELOW CHAINSPOUT	13.305	13.305	-61.1417	-61.1417	SAE			s_STV309 [5712]	BASALT [5712] / BASALT, ANDESITIC [4122]	<0.6Ma									VOL					WR [5712]	51.55	0.8		17.02				7.8	9.14	7.72	0.17		0.32	2.74	0.11
LESSER_ANTILLES 24.7-0.7.csv	[5712]	8 Lesser Antilles	St. Vincent	St. Vincent	52	15	S Lesser Antilles	LESSER ANTILLES / LESSER ANTILLES / ST. VINCENT / LA SOUFRIERE / PRE-SOMMA LAVA	LONDON POINT	13.3432	13.3432	-61.1277	-61.1277	SAE			s_STV315 [5712]	BASALT [5712]	<0.6Ma									VOL					WR [5712]	51.2	0.82		16.88				8.05	10.55	7.76	0.16		0.33	2.33	0.09
LESSER_ANTILLES 24.7-0.7.csv	[5712][4122]	8 Lesser Antilles	St. Vincent	St. Vincent	52	15	S Lesser Antilles	LESSER ANTILLES / LESSER ANTILLES / ST. VINCENT / LA SOUFRIERE	LOT 14, 1902 SURGE DEPOSIT?	13.3107	13.3107	-61.1468	-61.1468	SAE			s_STV334 [5712]	BASALT [5712] / BASALT, ANDESITIC [4122]	<0.6Ma							1902		VOL					WR [5712]	50.54	0.92		17.03				8.54	10.24	7.95	0.17		0.4	2.5	0.11
LESSER_ANTILLES 24.7-0.7.csv	[5712][4122]	8 Lesser Antilles	St. Vincent	St. Vincent	52	15	S Lesser Antilles	LESSER ANTILLES / LESSER ANTILLES / ST. VINCENT / LA SOUFRIERE / PRE-SOMMA LAVA	FALLS, RABACCA RIVER	13.3042	13.3042	-61.1405	-61.1405	SAE			s_STV358 [5712]	BASALT [5712] / BASALT, ANDESITIC [4122]	<0.6Ma									VOL					WR [5712]	47.29	0.94		15.71				9	10.32	12.53	0.17		0.28	2.25	0.1
LESSER_ANTILLES 24.7-0.7.csv	[5712][4122]	8 Lesser Antilles	St. Vincent	St. Vincent	52	15	S Lesser Antilles	LESSER ANTILLES / LESSER ANTILLES / ST. VINCENT / LA SOUFRIERE / YELLOW TUFF FORMATION	DARK VIEW	13.2867	13.2867	-61.2517	-61.2517	SAE			s_STV374 [5712]	BASALT [5712] / BASALT, ANDESITIC [4122]	<0.6Ma									VOL					WR [5712]	50.06	0.85		15.56				8.13	9.73	10.37	0.16		0.43	2.36	0.12
LESSER_ANTILLES 24.7-0.7.csv	[2494][6662]	8 Lesser Antilles	St. Vincent	St. Vincent	52	15	S Lesser Antilles	LESSER ANTILLES / LESSER ANTILLES / ST. VINCENT		13.1	13.4	-61	-61.3	SAE			s_WI1A(18) [2494]	BASALT [2494]	recent									VOL					WR [2494]	43.56	0.13		26.92				4.35	16.06	7.62	0.07		0.02	0.51	0.03
LESSER_ANTILLES 24.7-0.7.csv	[3286][2773]	8 Lesser Antilles	Grenada	Grenada	53	15	S Lesser Antilles	LESSER ANTILLES / LESSER ANTILLES / GRENADA / MOUNT GRANBY	FEDON^S CAMP	12	12.25	-61.5	-61.75	SAE			s_239 [3286]	ANKARAMITE [3286]	1000000 [2773]	1000000 [2773]	3000000 [2773]							VOL					WR [3286]	47.38	0.996		16.68		10.51			13.49	6.45	0.175		1.033	2.39	0.172
LESSER_ANTILLES 24.7-0.7.csv	[3325][3286][3396]	8 Lesser Antilles	Grenada	Grenada	53	15	S Lesser Antilles	LESSER ANTILLES / LESSER ANTILLES / GRENADA / MOUNT GRANBY / C-SERIES	FEDON^S CAMP	12.128	12.128	-61.75	-61.75	SAE			s_6155 [3325]	BASALT [3325]	not sure								CLINOPYROXENE-PHYRIC [3325]	VOL					WR [3325]	46.96	0.966		16.16		10.59			14.53	7.57	0.172		1.005	1.82	0.196
LESSER_ANTILLES 24.7-0.7.csv	[4679]	8 Lesser Antilles	Grenada	Grenada	53	15	S Lesser Antilles	LESSER ANTILLES / LESSER ANTILLES / GRENADA / MOUNT GRANBY / C-SERIES	FEDON^S CAMP	12.117	12.117	-61.722	-61.722	SAE			s_GD21 [4679]	BASALT [4679]										VOL					WR [4679]	46.98	1		16.38				9.44	14.81	7.15	0.17		0.98	1.97	0.19
LESSER_ANTILLES 24.7-0.7.csv	[3396][3325]	8 Lesser Antilles	Grenada	Grenada	53	15	S Lesser Antilles	LESSER ANTILLES / LESSER ANTILLES / GRENADA / MOUNT GRANBY	FEDON^S CAMP	12.128	12.128	-61.688	-61.688	SAE			s_262 [3396]	PICRITE [3396] / BASALT [3325]	2000000 [2773]	2000000 [2773]							OLIVINE-MICROPHYRIC [3325]	VOL					WR [3396]	47.08	0.814		13.4				9.1	10.31	14.83	0.167		0.497	2.14	0.141
LESSER_ANTILLES 24.7-0.7.csv	[3396][3325][2773]	8 Lesser Antilles	Grenada	Grenada	53	15	S Lesser Antilles	LESSER ANTILLES / LESSER ANTILLES / GRENADA / MOUNT GRANBY	FEDON^S CAMP	12.093	12.093	-61.745	-61.745	SAE			s_468 [3396]	PICRITE [3396] / BASALT [3325] / BASALT, ALKALINE, OLIVINE [2773]	2000000 [2773]	2000000 [2773]	5000000 [2773]						OLIVINE-MICROPHYRIC [3325]	VOL					WR [3396]	46.12	0.886		13.27				9.24	10.55	15.96	0.174		0.436	1.98	0.123
LESSER_ANTILLES 24.7-0.7.csv	[3396][3325]	8 Lesser Antilles	Grenada	Grenada	53	15	S Lesser Antilles	LESSER ANTILLES / LESSER ANTILLES / GRENADA / MOUNT GRANBY	FEDON^S CAMP	12.128	12.128	-61.685	-61.685	SAE			s_266 [3396]	PICRITE [3396] / BASALT [3325]	2000000 [2773]	2000000 [2773]							OLIVINE-MICROPHYRIC [3325]	VOL					WR [3396]	44.88	1.08		14.47				9.43	13.08	12.12	0.186		0.73	2.32	0.336
LESSER_ANTILLES 24.7-0.7.csv	[3396][3290][3325][2773]	8 Lesser Antilles	Grenada	Grenada	53	15	S Lesser Antilles	LESSER ANTILLES / LESSER ANTILLES / GRENADA / MOUNT GRANBY	FEDON^S CAMP	12.102	12.102	-61.713	-61.713	SAE			s_509 [3396]	PICRITE [3396] / BASANITOID [3290] / BASALT [3325]	2000000 [2773]	2000000 [2773]	5000000 [2773]						OLIVINE-MICROPHYRIC [3325]	VOL					WR [3396]	45.57	1.074		12.71		1.1	7.9	9.47	11.38	14.1	0.177		1.253	2.4	0.404
LESSER_ANTILLES 24.7-0.7.csv	[3396][3325]	8 Lesser Antilles	Grenada	Grenada	53	15	S Lesser Antilles	LESSER ANTILLES / LESSER ANTILLES / GRENADA / MOUNT GRANBY	FEDON^S CAMP	12.128	12.128	-61.687	-61.687	SAE			s_265 [3396]	ANDESITE [3396] / BASALT [3325]									OLIVINE-PHYRIC [3325]	VOL					WR [3396]	53.2	0.731		16.72				6.84	9.33	7.85	0.148		0.95	2.83	0.124
LESSER_ANTILLES 24.7-0.7.csv	[3325][3286][3396]	8 Lesser Antilles	Grenada	Grenada	53	15	S Lesser Antilles	LESSER ANTILLES / LESSER ANTILLES / GRENADA / C-SERIES		12.113	12.113	-61.673	-61.673	SAE			s_6104 [3325]	BASALT [3325]	0.7 Ma								CLINOPYROXENE-PHYRIC [3325]	VOL					WR [3325]	47.29	0.852		15.57		11.14			13.87	7.45	0.187		1.027	1.97	0.178
LESSER_ANTILLES 24.7-0.7.csv	[4679]	8 Lesser Antilles	Grenada	Grenada	53	15	S Lesser Antilles	LESSER ANTILLES / LESSER ANTILLES / GRENADA	MT. MAITLAND	12.06	12.09	-61.71	-61.76	SAE			s_GD5 [4679]	BASALT [4679]	1-2Ma									VOL					WR [4679]	47.24	0.99		15.18				9.56	11.72	10.49	0.17		0.49	2.42	0.13
LESSER_ANTILLES 24.7-0.7.csv	[4679]	8 Lesser Antilles	Grenada	Grenada	53	15	S Lesser Antilles	LESSER ANTILLES / LESSER ANTILLES / GRENADA	MT. MAITLAND	12.06	12.09	-61.71	-61.76	SAE			s_AMG6157 [4679]	PICRITE [4679]	1-2Ma									VOL					WR [4679]	47.36	0.88		13.43				9.03	11.63	12.79	0.18		0.75	2.07	0.15
LESSER_ANTILLES 24.7-0.7.csv	[4679]	8 Lesser Antilles	Grenada	Grenada	53	15	S Lesser Antilles	LESSER ANTILLES / LESSER ANTILLES / GRENADA	MT. MAITLAND	12.117	12.117	-61.722	-61.722	SAE			s_GD8 [4679]	PICRITE [4679]	1-2Ma									VOL					WR [4679]	46.35	0.86		14.36				9.21	10.94	13.86	0.17		0.36	1.93	0.11
LESSER_ANTILLES 24.7-0.7.csv	[4679]	8 Lesser Antilles	Grenada	Grenada	53	15	S Lesser Antilles	LESSER ANTILLES / LESSER ANTILLES / GRENADA	MT. MAITLAND	12.117	12.117	-61.722	-61.722	SAE			s_GD10 [4679]	PICRITE [4679]	1-2Ma									VOL					WR [4679]	46.5	0.85		14.34				9.27	10.88	14.15	0.17		0.39	1.9	0.1
LESSER_ANTILLES 24.7-0.7.csv	[4679]	8 Lesser Antilles	Grenada	Grenada	53	15	S Lesser Antilles	LESSER ANTILLES / LESSER ANTILLES / GRENADA	MT. MAITLAND	12.117	12.117	-61.722	-61.722	SAE			s_GD11 [4679]	PICRITE [4679]	1-2Ma									VOL					WR [4679]	46.68	0.86		14.59				9.15	10.8	14.06	0.17		0.4	1.92	0.11
LESSER_ANTILLES 24.7-0.7.csv	[4679]	8 Lesser Antilles	Grenada	Grenada	53	15	S Lesser Antilles	LESSER ANTILLES / LESSER ANTILLES / GRENADA	MT. MAITLAND	12.117	12.117	-61.722	-61.722	SAE			s_GD14 [4679]	PICRITE [4679]	1-2Ma									VOL					WR [4679]	46.03	0.88		14.72				9.33	10.85	14.41	0.16		0.4	2.12	0.11
LESSER_ANTILLES 24.7-0.7.csv	[4679]	8 Lesser Antilles	Grenada	Grenada	53	15	S Lesser Antilles	LESSER ANTILLES / LESSER ANTILLES / GRENADA	MT. MAITLAND	12.117	12.117	-61.722	-61.722	SAE			s_GD16 [4679]	PICRITE [4679]	1-2Ma									VOL					WR [4679]	44.89	0.91		14.26				8.91	12.7	13.55	0.18		0.68	2.39	0.36
LESSER_ANTILLES 24.7-0.7.csv	[4679]	8 Lesser Antilles	Grenada	Grenada	53	15	S Lesser Antilles	LESSER ANTILLES / LESSER ANTILLES / GRENADA	MT. MAITLAND	12.117	12.117	-61.722	-61.722	SAE			s_AMG6078 [4679]	PICRITE [4679]	1-2Ma									VOL					WR [4679]	45.88	1.13		12.49				9.34	12.21	14.47	0.17		1.1	1.88	0.3
LESSER_ANTILLES 24.7-0.7.csv	[4679]	8 Lesser Antilles	Grenada	Grenada	53	15	S Lesser Antilles	LESSER ANTILLES / LESSER ANTILLES / GRENADA	FEDON^S CAMP	12.117	12.117	-61.722	-61.722	SAE			s_GD12 [4679]	PICRITE [4679]	0.5-1Ma									VOL					WR [4679]	45.36	1.15		13.26				9.31	12.51	13.66	0.17		1.03	1.78	0.29
LESSER_ANTILLES 24.7-0.7.csv	[21487]	8 Lesser Antilles	Grenada	Grenada	53	15	S Lesser Antilles	LESSER ANTILLES / LESSER ANTILLES / GRENADA	N OF BRISAN	12.1074	12.1074	-61.7498	-61.7498	SAE			s_GR16 [21487]	BASALT [21487]	550 ka								GLOMEROPORPHYRITIC [21487]	VOL					WR [21487]	47.72	0.96		15.75				8.21	10.93	11.06	0.16		0.71	2.46	0.17
LESSER_ANTILLES 24.7-0.7.csv	[21487]	8 Lesser Antilles	Grenada	Grenada	53	15	S Lesser Antilles	LESSER ANTILLES / LESSER ANTILLES / GRENADA		12	12.25	-61.5	-61.75	SAE			s_GR3 [21487]	BASALT [21487]	<2Ma									VOL					WR [21487]	48.03	1.02		16.83				9.36	12.49	6.4	0.17		1.14	2.41	0.17
LESSER_ANTILLES 24.7-0.7.csv	[21487]	8 Lesser Antilles	Grenada	Grenada	53	15	S Lesser Antilles	LESSER ANTILLES / LESSER ANTILLES / GRENADA		12	12.25	-61.5	-61.75	SAE			s_GR9 [21487]	BASALT [21487]	<2Ma									VOL					WR [21487]	45.88	0.92		16.95				10.3	13.39	6.91	0.19		0.76	1.86	0.16
LESSER_ANTILLES 24.7-0.7.csv	[21487]	8 Lesser Antilles	Grenada	Grenada	53	15	S Lesser Antilles	LESSER ANTILLES / LESSER ANTILLES / GRENADA		12	12.25	-61.5	-61.75	SAE			s_GR22 [21487]	BASALT [21487]	<2Ma									VOL					WR [21487]	47.07	0.95		14.73				9.02	10.31	12.82	0.18		0.66	2.39	0.17
LESSER_ANTILLES 24.7-0.7.csv	[21487]	8 Lesser Antilles	Grenada	Grenada	53	15	S Lesser Antilles	LESSER ANTILLES / LESSER ANTILLES / GRENADA		12	12.25	-61.5	-61.75	SAE			s_GR32 [21487]	BASALT [21487]	<2Ma									VOL					WR [21487]	46.36	0.815		13.55				9.27	10.08	14.72	0.17		0.48	2.24	0.11
LESSER_ANTILLES 24.7-0.7.csv	[21487]	8 Lesser Antilles	Grenada	Grenada	53	15	S Lesser Antilles	LESSER ANTILLES / LESSER ANTILLES / GRENADA		12	12.25	-61.5	-61.75	SAE			s_GR33 [21487]	BASALT [21487]	<2Ma									VOL					WR [21487]	47.28	0.874		13.68				8.72	11.58	13.17	0.15		0.51	1.97	0.12
LESSER_ANTILLES 24.7-0.7.csv	[21487]	8 Lesser Antilles	Grenada	Grenada	53	15	S Lesser Antilles	LESSER ANTILLES / LESSER ANTILLES / GRENADA		12	12.25	-61.5	-61.75	SAE			s_GR36 [21487]	BASALT [21487]	<2Ma									VOL					WR [21487]	47	0.838		14.6				8.57	10.25	13.4	0.18		0.42	2.03	0.11
LESSER_ANTILLES 24.7-0.7.csv	[21487]	8 Lesser Antilles	Grenada	Grenada	53	15	S Lesser Antilles	LESSER ANTILLES / LESSER ANTILLES / GRENADA		12	12.25	-61.5	-61.75	SAE			s_GR37 [21487]	BASALT [21487]	<2Ma									VOL					WR [21487]	47.53	0.839		14.74				8.72	10.86	13.09	0.18		0.44	2.19	0.11
LESSER_ANTILLES 24.7-0.7.csv	[3396]	8 Lesser Antilles	Grenada	Grenada	53	15	S Lesser Antilles	LESSER ANTILLES / LESSER ANTILLES / GRENADA / MOUNT ST. CATHERINE		12.198	12.198	-61.615	-61.615	SAE			s_43 [3396]	PICRITE [3396]	no age									VOL					WR [3396]	46.51	0.891		13.47				9.22	11.66	13.83	0.179		0.443	2.24	0.122
LESSER_ANTILLES 24.7-0.7.csv	[3396]	8 Lesser Antilles	Grenada	Grenada	53	15	S Lesser Antilles	LESSER ANTILLES / LESSER ANTILLES / GRENADA / MOUNT ST. CATHERINE		12.178	12.178	-61.623	-61.623	SAE			s_114 [3396]	PICRITE [3396]	no age									VOL					WR [3396]	47.85	0.915		15.09				9.04	9.86	12.63	0.181		0.571	1.75	0.225
LESSER_ANTILLES 24.7-0.7.csv	[3396]	8 Lesser Antilles	Grenada	Grenada	53	15	S Lesser Antilles	LESSER ANTILLES / LESSER ANTILLES / GRENADA	SE MOUNTAIN	12.113	12.113	-61.673	-61.673	SAE			s_6103 [3396]	PICRITE [3396]	no age									VOL					WR [3396]	45.1	0.919		12.53				9.4	12.3	15.28	0.179		0.537	1.93	0.229
LESSER_ANTILLES 24.7-0.7.csv	[13520][22046]	8 Lesser Antilles	Grenada	Grenada	53	15	S Lesser Antilles	LESSER ANTILLES / LESSER ANTILLES / GRENADA		12.135	12.135	-61.748	-61.748	SAE			s_LAG2 [13520]	BASALT [13520]										VOL					WR [13520]	47	1.04		16.8				9.79	13.78	6.86	0.15		0.95	2.15	0.18
LESSER_ANTILLES 24.7-0.7.csv	[2494][13520]	8 Lesser Antilles	Grenada	Grenada	53	15	S Lesser Antilles	LESSER ANTILLES / LESSER ANTILLES / GRENADA		12	12.25	-61.5	-61.75	SAE			s_GDA014 [2494]	BASALT [2494] / NOT GIVEN [13520]	Holocene		10000 [2494]							VOL					WR [2494]	47.89	0.97		15.07				8.67	10.78	11.65	0.17		0.63	2.45	0.18
LESSER_ANTILLES 24.7-0.7.csv	[3325][3286][3396]	8 Lesser Antilles	Grenada	Grenada	53	15	S Lesser Antilles	LESSER ANTILLES / LESSER ANTILLES / GRENADA / MOUNT MORITZ / C-SERIES	MOUNT MAITLAND	12.078	12.078	-61.753	-61.753	SAE			s_6264 [3325]	BASALT [3325]	0.9 Ma[3286]	0.9 Ma[3286]	14000000 [3286]						CLINOPYROXENE-PHYRIC [3325]	VOL					WR [3325]	48.05	0.89		16.04		10.77			13.44	6.61	0.159		0.739	2.43	0.24
LESSER_ANTILLES 24.7-0.7.csv	[3325][3286][3396]	8 Lesser Antilles	Grenada	Grenada	53	15	S Lesser Antilles	LESSER ANTILLES / LESSER ANTILLES / GRENADA / MOUNT ST. CATHERINE / C-SERIES		12.217	12.217	-61.6888	-61.6888	SAE			s_6127 [3325]	BASALT [3325]	500000 [3286]	500000 [3286]	2000000 [3286]						CLINOPYROXENE-PHYRIC [3325]	VOL					WR [3325]	48.99	0.986		16.76		10.3			12.63	6.26	0.16		1.007	2.44	0.182
LESSER_ANTILLES 24.7-0.7.csv	[3396][3325]	8 Lesser Antilles	Grenada	Grenada	53	15	S Lesser Antilles	LESSER ANTILLES / LESSER ANTILLES / GRENADA / MOUNT ST. CATHERINE		12.175	12.175	-61.618	-61.618	SAE			s_375 [3396]	PICRITE [3396] / BASALT [3325]	not sure								OLIVINE-MICROPHYRIC [3325]	VOL					WR [3396]	46.38	0.931		13.81				9.36	12.12	13.23	0.171		0.431	2.07	0.111
LESSER_ANTILLES 24.7-0.7.csv	[3396][3290][3325]	8 Lesser Antilles	Grenada	Grenada	53	15	S Lesser Antilles	LESSER ANTILLES / LESSER ANTILLES / GRENADA / MOUNT ST. CATHERINE		12.188	12.188	-61.65	-61.65	SAE			s_286 [3396]	PICRITE [3396] / BASALT, ALKALINE, OLIVINE [3290] / BASALT [3325]	500000 [2773]	500000 [2773]							OLIVINE-MICROPHYRIC [3325]	VOL					WR [3396]	45.76	0.979		15.02		1.06	7.61	9.46	12.62	11.78	0.182		0.639	1.94	0.294
LESSER_ANTILLES 24.7-0.7.csv	[3396][3290][2773]	8 Lesser Antilles	Grenada	Grenada	53	15	S Lesser Antilles	LESSER ANTILLES / LESSER ANTILLES / GRENADA / MOUNT ST. CATHERINE		12.177	12.177	-61.668	-61.668	SAE			s_314 [3396]	PICRITE [3396] / BASALT, ALKALINE, OLIVINE [3290]	500000 [2773]	500000 [2773]	2000000 [2773]							VOL					WR [3396]	45.99	1.044		14.41		1.08	7.75	9.38	12.86	12.07	0.177		0.493	1.67	0.28
Andean Northern Volcanic Arc Zones.csv	[10402]	9 NVZ	Nevado Del Ruiz	Nevado Del Ruiz	54	16	Colombia	ANDEAN ARC / NORTHERN ANDEAN VOLCANIC ZONE / COLOMBIA / NEVADO DEL RUIZ		5	5	-75	-75	SAE			s_MB 260 [10402]	THOLEIITE [10402]	Pleistocene									VOL					WR [10402]	51.3	1.01		16.9		1.05	7.01		7.68	8.88	0.15		0.57	3.05	0.21
Andean Northern Volcanic Arc Zones.csv	[10402]	9 NVZ	Nevado Del Ruiz	Nevado Del Ruiz	54	16	Colombia	ANDEAN ARC / NORTHERN ANDEAN VOLCANIC ZONE / COLOMBIA / NEVADO DEL RUIZ		5	5	-75	-75	SAE			s_MB 257A [10402]	ANDESITE, THOLEIITIC [10402]	Pleistocene									VOL					WR [10402]	55.5	0.81		15.2		0.9	6		7.56	8.32	0.13		1.16	3.35	0.17
Andean Northern Volcanic Arc Zones.csv	[19324]	9 NVZ	Yanaurcu	Yanaurcu	55	17	Ecuador	ANDEAN ARC / NORTHERN ANDEAN VOLCANIC ZONE / ECUADOR / YANAURCU	NAGNARO DOME	0.512115	0.512115	-78.3317	-78.3317	SAE	3925	3925	s_PB12014B [19324]	ANDESITE, BASALTIC [19324]	Pleistocene									VOL					WR [19324]	56.0981	0.740371		16.1881	0.040020042			7.39	7.88395	6.31316	0.130065	0.010005011	1.03052	3.06153	0.130065
Andean Northern Volcanic Arc Zones.csv	[19324]	9 NVZ	Yanaurcu	Yanaurcu	55	17	Ecuador	ANDEAN ARC / NORTHERN ANDEAN VOLCANIC ZONE / ECUADOR / YANAURCU	ANDESITIC OLD YANAURCU	0.510096	0.510096	-78.3218	-78.3218	SAE	3955	3955	s_PB12029B [19324]	BASALT [19324]	Pleistocene									VOL					WR [19324]	48.4848	1.1886		15.1348	0.039619886			11.81	10.7667	8.04284	0.178289	0.019809943	0.15848	1.81261	0.0693348
Andean Northern Volcanic Arc Zones.csv	[20960]	9 NVZ	Cotacachi	Cotacachi	56	17	Ecuador	ANDEAN ARC / NORTHERN ANDEAN VOLCANIC ZONE / ECUADOR / COTACACHI		0.361	0.361	-78.348	-78.348	SAE			s_MM-1B [20960]	ANDESITE [20960]	Pleistocene									VOL					WR [20960]	54.75	0.66		15.2				8.1	8.75	7.87	0.15		0.77	2.85	0.13
Andean Northern Volcanic Arc Zones.csv	[20960][15840]	9 NVZ	Almas Santas	Almas Santas	57	17	Ecuador	ANDEAN ARC / NORTHERN ANDEAN VOLCANIC ZONE / ECUADOR / ALMAS SANTAS		-0.59	-0.59	-78.854	-78.854	SAE			s_ALS-66 [20960] / s_ALS 66 [15840]	ANDESITE, BASALTIC [20960]	Pleistocene									VOL					WR [20960]	53.35	0.75		16.15		9.16	8.24	8.23	8.35	8	0.14		0.53	3.35	0.15
Andean Northern Volcanic Arc Zones.csv	[7935]	9 NVZ	Pichincha	Pichincha	58	17	Ecuador	ANDEAN ARC / NORTHERN ANDEAN VOLCANIC ZONE / ECUADOR / PICHINCHA		-0.1708	-0.1708	-78.5983	-78.5983	SAE			s_PICH32K [7935]	ANDESITE [7935]	Quaternary				QUATERNARY [7935]					VOL					WR [7935]	57	0.52		15.6				7.22	7.3	6.02	0.13		1.22	3.17	0.09
Andean Northern Volcanic Arc Zones.csv	[14523]	9 NVZ	Pichincha	Pichincha	58	17	Ecuador	ANDEAN ARC / NORTHERN ANDEAN VOLCANIC ZONE / ECUADOR / PICHINCHA	GUAGUA PICHINCHA CRISTAL DOMES	-0.17	-0.17	-78.6	-78.6	SAE			s_PICH 32K [14523]	ANDESITE [14523]	300 [14523]	300 [14523]	300 [14523]							VOL					WR [14523]	57	0.52		15.6				7.22	7.3	6.02	0.13		1.22	3.17	0.09
Andean Northern Volcanic Arc Zones.csv	[14523]	9 NVZ	Pichincha	Pichincha	58	17	Ecuador	ANDEAN ARC / NORTHERN ANDEAN VOLCANIC ZONE / ECUADOR / PICHINCHA	RUCU PICHINCHA	-0.17	-0.17	-78.6	-78.6	SAE			s_PICH 70B [14523]	ANDESITE [14523]	850000 [14523]	850000 [14523]	850000 [14523]							VOL					WR [14523]	54.7	0.56		15.4				7.52	7.9	7.66	0.14		1.12	2.86	0.13
Andean Northern Volcanic Arc Zones.csv	[21640]	5(9)NVZ rear-arc	Reventador	Reventador	59	18	Ecuador rear-arc	ANDEAN ARC / NORTHERN ANDEAN VOLCANIC ZONE / ECUADOR / REVENTADOR		-0.10184	-0.10184	-77.5932	-77.5932	SAE	1414	1414	s_AG14-011 [21640]	ANDESITE, BASALTIC [21640]					QUATERNARY [21640]					VOL					WR [21640]	52.29	0.95		17.25				8.18	8.72	6.41			1.38	3.66	0.35
Andean Northern Volcanic Arc Zones.csv	[21640]	5(9)NVZ rear-arc	Reventador	Reventador	59	18	Ecuador rear-arc	ANDEAN ARC / NORTHERN ANDEAN VOLCANIC ZONE / ECUADOR / REVENTADOR		-0.10184	-0.10184	-77.5932	-77.5932	SAE	1414	1414	s_AG14-012 [21640]	ANDESITE, BASALTIC [21640]					QUATERNARY [21640]					VOL					WR [21640]	50.89	1.11		17.02				8.7	9.12	6.76			1.32	3.63	0.4
Andean Northern Volcanic Arc Zones.csv	[14524]	5(9)NVZ rear-arc	Reventador	Reventador	59	18	Ecuador rear-arc	ANDEAN ARC / NORTHERN ANDEAN VOLCANIC ZONE / ECUADOR / REVENTADOR		-0.081	-0.081	-77.659	-77.659	SAE			s_REV 14 [14524]	ANDESITE, BASALTIC [14524]	Plio-Quaternary									VOL					WR [14524]	52	0.94		17				8.28	8.5	6.3	0.15		1.38	3.74	0.35
Andean Northern Volcanic Arc Zones.csv	[20960]	5(9)NVZ rear-arc	Pan De Azucar	Pan De Azucar	60	18	Ecuador rear-arc	ANDEAN ARC / NORTHERN ANDEAN VOLCANIC ZONE / ECUADOR / PAN DE AZUCAR		-0.432	-0.432	-77.719	-77.719	SAE			s_PDA-03E [20960]	BASALT [20960]	Quaternary									VOL					WR [20960]	46.6	1.31		14.7				9.63	11.4	10.25	0.17		1.11	2.54	0.48
Andean Northern Volcanic Arc Zones.csv	[7890]	5(9)NVZ rear-arc	Sumaco	Sumaco	61	18	Ecuador rear-arc	ANDEAN ARC / NORTHERN ANDEAN VOLCANIC ZONE / ECUADOR / SUMACO		-0.538	-0.538	-77.626	-77.626	SAE			s_SUMA [7890]	BASALT [7890]	Plio–Quaternary, aseismic subduction, has adakite									VOL					WR [7890]	44.5	1.33		16		11.3			12.5	6.15	0.22		2.74	4.1	1.05
Andean Northern Volcanic Arc Zones.csv	[9195]	5(9)NVZ rear-arc	Sumaco	Sumaco	61	18	Ecuador rear-arc	ANDEAN ARC / NORTHERN ANDEAN VOLCANIC ZONE / ECUADOR / SUMACO		-0.538	-0.538	-77.626	-77.626	SAE			s_3D3 [9195]	BASALT [9195]	Holocene									VOL					WR [9195]	43.24	1.72		15.82				11.62	14.2	6.31	0.23		1.05	4.43	1.38
Andean Northern Volcanic Arc Zones.csv	[20960][15840]	5(9)NVZ rear-arc	Sumaco	Sumaco	61	18	Ecuador rear-arc	ANDEAN ARC / NORTHERN ANDEAN VOLCANIC ZONE / ECUADOR / SUMACO		-0.538	-0.538	-77.626	-77.626	SAE			s_SUM 04 [20960]	BASALT [20960]	Holocene									VOL					WR [20960]	44.58	1.33		16.03		11.27	10.14	10.14	12.5	6.16	0.22		2.74	4.11	1.05
Andean Northern Volcanic Arc Zones.csv	[20960][15840]	5(9)NVZ rear-arc	Sumaco	Sumaco	61	18	Ecuador rear-arc	ANDEAN ARC / NORTHERN ANDEAN VOLCANIC ZONE / ECUADOR / SUMACO		-0.538	-0.538	-77.626	-77.626	SAE			s_SUM 05 [20960]	BASALT [20960]	Holocene									VOL					WR [20960]	44.5	1.68		14.93		10.92	9.83	9.83	13.37	7.06	0.19		2.96	3.25	1.14
Andean Northern Volcanic Arc Zones.csv	[20960][15840]	5(9)NVZ rear-arc	Sumaco	Sumaco	61	18	Ecuador rear-arc	ANDEAN ARC / NORTHERN ANDEAN VOLCANIC ZONE / ECUADOR / SUMACO		-0.538	-0.538	-77.626	-77.626	SAE			s_SUM 32 [20960]	BASALT [20960]	Holocene									VOL					WR [20960]	45.42	1.54		16.88		11.05	9.95	9.94	10.75	6.23	0.2		2.44	4.46	1.03
Andean Northern Volcanic Arc Zones.csv	[20960][15840]	5(9)NVZ rear-arc	Sumaco	Sumaco	61	18	Ecuador rear-arc	ANDEAN ARC / NORTHERN ANDEAN VOLCANIC ZONE / ECUADOR / SUMACO		-0.538	-0.538	-77.626	-77.626	SAE			s_SUM-37 [20960] / s_SUM 37 [15840]	BASALT [20960]	Holocene									VOL					WR [20960]	43.1	1.59		13.68		11.57	10.41	10.3	13	10.4	0.2		1.51	3.14	0.91
Andean Northern Volcanic Arc Zones.csv	[21643]	5(9)NVZ rear-arc	Tungurahua	Tungurahua	62	18	Ecuador rear-arc	ANDEAN ARC / NORTHERN ANDEAN VOLCANIC ZONE / ECUADOR / TUNGURAHUA		-1.467	-1.467	-78.444	-78.444	SAE			s_TU.BA.B [21643]	ANDESITE, BASALTIC [21643]	<3000									VOL					WR [21643]	54.01	0.91		16.24				7.78	8.3	6.78	0.14		1.26	3.49	0.22
Andean Northern Volcanic Arc Zones.csv	[21643]	5(9)NVZ rear-arc	Tungurahua	Tungurahua	62	18	Ecuador rear-arc	ANDEAN ARC / NORTHERN ANDEAN VOLCANIC ZONE / ECUADOR / TUNGURAHUA		-1.467	-1.467	-78.444	-78.444	SAE			s_TU.LU.A [21643]	ANDESITE, BASALTIC [21643]	<3001									VOL					WR [21643]	54.61	0.95		16.13				7.65	7.76	6.71	0.13		1.39	3.54	0.25
Andean Northern Volcanic Arc Zones.csv	[21643]	5(9)NVZ rear-arc	Tungurahua	Tungurahua	62	18	Ecuador rear-arc	ANDEAN ARC / NORTHERN ANDEAN VOLCANIC ZONE / ECUADOR / TUNGURAHUA		-1.467	-1.467	-78.444	-78.444	SAE			s_TU.LU.B [21643]	ANDESITE, BASALTIC [21643]	<3002									VOL					WR [21643]	55.12	0.82		15.26				7.42	8.1	7.46	0.13		1.33	3.38	0.21
Andean Northern Volcanic Arc Zones.csv	[21643]	5(9)NVZ rear-arc	Tungurahua	Tungurahua	62	18	Ecuador rear-arc	ANDEAN ARC / NORTHERN ANDEAN VOLCANIC ZONE / ECUADOR / TUNGURAHUA		-1.467	-1.467	-78.444	-78.444	SAE			s_TU.LU.C [21643]	ANDESITE, BASALTIC [21643]	<3003									VOL					WR [21643]	55.36	0.84		15.9				7.14	7.95	6.59	0.13		1.38	3.5	0.23
Andean Northern Volcanic Arc Zones.csv	[21643]	5(9)NVZ rear-arc	Tungurahua	Tungurahua	62	18	Ecuador rear-arc	ANDEAN ARC / NORTHERN ANDEAN VOLCANIC ZONE / ECUADOR / TUNGURAHUA		-1.467	-1.467	-78.444	-78.444	SAE			s_TUNG-PS-07C [21643]	ANDESITE, BASALTIC [21643]	<3004									VOL					WR [21643]	55.93	0.92		16.38				7.06	7.81	6.34	0.13		1.47	3.74	0.24
Andean Northern Volcanic Arc Zones.csv	[20960]	5(9)NVZ rear-arc	Puyo	Puyo	63	18	Ecuador rear-arc	ANDEAN ARC / NORTHERN ANDEAN VOLCANIC ZONE / ECUADOR / PUYO		-1.479	-1.479	-77.788	-77.788	SAE			s_PUY-14A [20960]	BASALT [20960]	Quaternary									VOL					WR [20960]	49.1	1.61		13				8.39	8.9	9.55	0.14		3.9	1.98	1.04
Andean Northern Volcanic Arc Zones.csv	[12612]	5(9)NVZ rear-arc	Puyo	Puyo	63	18	Ecuador rear-arc	ANDEAN ARC / NORTHERN ANDEAN VOLCANIC ZONE / ECUADOR / MERA LAVA FLOW	PUYO AREA, MERA LAVA	-1.47	-1.47	-77.98	-77.98	SAE			s_MER2 [12612]	NOT GIVEN [12612]	Late Pliocene to Middle Pleistocene, rear-arc				NEOGENE [12612]				POORLY VESICULAR, SUB-APHYRIC [12612]	VOL					WR [12612]	51.1	1.2		15.7				9.18	8.1	7.08	0.16		1.11	3.38	0.38
Andean Northern Volcanic Arc Zones.csv	[12612]	5(9)NVZ rear-arc	Puyo	Puyo	63	18	Ecuador rear-arc	ANDEAN ARC / NORTHERN ANDEAN VOLCANIC ZONE / ECUADOR / MERA LAVA FLOW	PUYO AREA, MERA LAVA	-1.47	-1.47	-77.98	-77.98	SAE			s_MER5 [12612]	NOT GIVEN [12612]	Late Pliocene to Middle Pleistocene, rear-arc				NEOGENE [12612]				POORLY VESICULAR, SUB-APHYRIC [12612]	VOL					WR [12612]	52.7	1.08		16.35				7.87	8.2	6.15	0.13		1.28	3.62	0.41
Andean Northern Volcanic Arc Zones.csv	[12612]	5(9)NVZ rear-arc	Puyo	Puyo	63	18	Ecuador rear-arc	ANDEAN ARC / NORTHERN ANDEAN VOLCANIC ZONE / ECUADOR / PUYO FORMATION	PUYO AREA, PUYO CONES	-1.47	-1.47	-77.98	-77.98	SAE			s_PUY13B [12612]	NOT GIVEN [12612]	Late Pliocene to Middle Pleistocene, rear-arc				NEOGENE [12612]				SLIGHTLY PORPHYRITIC [12612]	VOL					WR [12612]	48.2	1.55		13.3				8.77	9.3	10.5	0.15		2.76	2.11	0.9
Andean Northern Volcanic Arc Zones.csv	[12612]	5(9)NVZ rear-arc	Puyo	Puyo	63	18	Ecuador rear-arc	ANDEAN ARC / NORTHERN ANDEAN VOLCANIC ZONE / ECUADOR / PUYO FORMATION	PUYO AREA, PUYO CONES	-1.47	-1.47	-77.98	-77.98	SAE			s_PUY20A [12612]	NOT GIVEN [12612]	Late Pliocene to Middle Pleistocene, rear-arc				NEOGENE [12612]				SLIGHTLY PORPHYRITIC [12612]	VOL					WR [12612]	48.35	1.54		14.15				8.85	9.18	9.44	0.14		3.17	2	0.75
Andean Northern Volcanic Arc Zones.csv	[9212]	5(9)NVZ rear-arc	Sangay	Sangay	64	18	Ecuador rear-arc	ANDEAN ARC / NORTHERN ANDEAN VOLCANIC ZONE / ECUADOR / SANGAY		-2.005	-2.005	-78.341	-78.341	SAE			s_SAN 61 [9212]	NOT GIVEN [9212]	Pleistocene-now									VOL					WR [9212]	53.64	0.92		16.18				7.82	8.13	6.74	0.14		1.6	3.63	0.33
Andean Northern Volcanic Arc Zones.csv	[9212]	5(9)NVZ rear-arc	Sangay	Sangay	64	18	Ecuador rear-arc	ANDEAN ARC / NORTHERN ANDEAN VOLCANIC ZONE / ECUADOR / SANGAY		-2.005	-2.005	-78.341	-78.341	SAE			s_SAN 26A [9212]	NOT GIVEN [9212]	Pleistocene-now									VOL					WR [9212]	53.84	0.94		17.17				7.2	7.68	6.34	0.12		1.55	4.04	0.31
Andean Northern Volcanic Arc Zones.csv	[9212]	5(9)NVZ rear-arc	Sangay	Sangay	64	18	Ecuador rear-arc	ANDEAN ARC / NORTHERN ANDEAN VOLCANIC ZONE / ECUADOR / SANGAY		-2.005	-2.005	-78.341	-78.341	SAE			s_SAN 60C [9212]	NOT GIVEN [9212]	Pleistocene-now									VOL					WR [9212]	54.34	0.91		16.6				7.16	7.91	6.27	0.12		1.52	4.03	0.34
Andean Northern Volcanic Arc Zones.csv	[20960]	5(9)NVZ rear-arc	Sangay	Sangay	64	18	Ecuador rear-arc	ANDEAN ARC / NORTHERN ANDEAN VOLCANIC ZONE / ECUADOR / SANGAY		-2.005	-2.005	-78.341	-78.341	SAE			s_SAN-20B [20960]	BASALT [20960]	Quaternary									VOL					WR [20960]	49.6	1		14.6				8.59	8.8	10.97	0.15		1.3	3.3	0.34
Andean Central Volcanic Arc Zones.csv	[10163]	10 CVZ	Huambo	Huambo	65	19	S Peru	ANDEAN ARC / CENTRAL ANDEAN VOLCANIC ZONE / PERU / HUAMBO VOLCANIC FIELD	C TURURUMA	-15.17	-16	-72	-72.5	SAE			s_VOL6 [10163]	ANDESITE, BASALTIC [10163]	Quaternary									VOL					WR [10163]	51.43	1.21		16.71				8.13	8.72	7.3	0.12		1.38	3.37	0.29
Andean Central Volcanic Arc Zones.csv	[4222]	10 CVZ	Sajama	Sajama	66	20	S Peru rear-arc	ANDEAN ARC / CENTRAL ANDEAN VOLCANIC ZONE / BOLIVIA / SAJAMA	FIELD EAST OF SAJAMA VOLCANO	-17.83	-17.83	-68.42	-68.42	SAE			s_BC9029 [4222]	ANDESITE, BASALTIC [4222]	<2.2Ma, behind arc				CENOZOIC [4222]					VOL					WR [4222]	52.6	1.85		16.02				8.37	7.4	6.07	0.13		1.94	3.98	0.71
Andean Central Volcanic Arc Zones.csv	[4222]	10 CVZ	Sajama	Sajama	66	20	S Peru rear-arc	ANDEAN ARC / CENTRAL ANDEAN VOLCANIC ZONE / BOLIVIA / SAJAMA		-18.15	-18.15	-68.87	-68.87	SAE			s_BC9030 [4222]	BASALT [4222]	not sure,behind arc,Sajama area should have similar age				CENOZOIC [4222]					VOL					WR [4222]	50.77	1.87		15.36				8.93	8.05	7.23	0.15		2.1	3.74	0.82
Andean Central Volcanic Arc Zones.csv	[4222]	10 CVZ	Sajama	Sajama	66	20	S Peru rear-arc	ANDEAN ARC / CENTRAL ANDEAN VOLCANIC ZONE / BOLIVIA / SAJAMA		-18.15	-18.15	-68.87	-68.87	SAE			s_BC9031 [4222]	ANDESITE, BASALTIC [4222]	not sure,behind arc,Sajama area should have similar age				CENOZOIC [4222]					VOL					WR [4222]	51.65	1.68		15.41				8.43	8.27	6.05	0.14		2.37	3.94	0.92
Andean Central Volcanic Arc Zones.csv	[13695][11543]	6(10) CVZ rear-arc	Quimsachata	Quimsachata	67	20	S Peru rear-arc	ANDEAN ARC / CENTRAL ANDEAN VOLCANIC ZONE / PERU / OROSCOCHA		-14.089	-14.089	-71.3737	-71.3737	SAE			s_SHO-01-66-2 [13695]	BASALT [13695] / NOT GIVEN [11543]					QUATERNARY [13695] / PLEISTOCENE [11543]					VOL					WR [13695]	50.1	1.504		14.5				7.22	6.99	7.87	0.122		4.81	2.79	1.282
Andean Central Volcanic Arc Zones.csv	[4222]	10 CVZ	Quillacas	Quillacas	68	20	S Peru rear-arc	ANDEAN ARC / CENTRAL ANDEAN VOLCANIC ZONE / BOLIVIA / QUILLACAS	FIELD WEST OF LAGO POOPO, LAGUNA NEKHE KKOTA	-19.48	-19.48	-67.47	-67.47	SAE			s_BC9014 [4222]	ANDESITE, BASALTIC [4222]	Holocene,behind arc				CENOZOIC [4222]					VOL					WR [4222]	51.88	1.39		15.65				7.95	8.3	7.76	0.16		2.22	3.4	0.42
Andean Central Volcanic Arc Zones.csv	[4222]	10 CVZ	Quillacas	Quillacas	68	20	S Peru rear-arc	ANDEAN ARC / CENTRAL ANDEAN VOLCANIC ZONE / BOLIVIA / QUILLACAS	FIELD WEST OF LAGO POOPO	-19.47	-19.47	-67.45	-67.45	SAE			s_BC9015 [4222]	ANDESITE, BASALTIC [4222]	Holocene,behind arc				CENOZOIC [4222]					VOL					WR [4222]	51.98	1.35		15.62				7.98	8.17	7.99	0.16		2.09	3.37	0.39
Andean Central Volcanic Arc Zones.csv	[4222]	10 CVZ	Chiguana	Ollague	69	21	N Chile	ANDEAN ARC / CENTRAL ANDEAN VOLCANIC ZONE / BOLIVIA / CERRO CHIGUANA	FIELD NORTHEAST OF OLLAGÜE VOLCANO	-21.07	-21.07	-67.97	-67.97	SAE			s_BC9012 [4222]	ANDESITE [4222]					CENOZOIC [4222]					VOL					WR [4222]	53.59	0.96		15.58				8.36	6.86	8.37	0.16		1.79	3.1	0.27
Andean Central Volcanic Arc Zones.csv	[3213]	10 CVZ	Ollague	Ollague	69	21	N Chile	ANDEAN ARC / CENTRAL ANDEAN VOLCANIC ZONE / CHILE / OLLAGUE / CHASCA ORKHO SERIES		-21.2	-21.33	-68	-68.033	SAE		5863	s_OLA9017 [3213]	NOT GIVEN [3213]	Late Quaternary									VOL					WR [3213]	52.9	1.25		16.2			8.6		8.4	6.8	0.14		1.5	3.3	0.23
Andean Central Volcanic Arc Zones.csv	[3213]	10 CVZ	Ollague	Ollague	69	21	N Chile	ANDEAN ARC / CENTRAL ANDEAN VOLCANIC ZONE / CHILE / OLLAGUE / CHASCA ORKHO SERIES		-21.2	-21.33	-68	-68.033	SAE		5863	s_OLA9019 [3213]	ANDESITE, BASALTIC [3213]	Late Quaternary									VOL					WR [3213]	54.5	1.32		16.1			8.5		8.5	6.6	0.12		1.4	3.4	0.23
Andean Central Volcanic Arc Zones.csv	[21117][18443]	10 CVZ	San Pedro-San Pablo	San Pedro-San Pablo	70	21	N Chile	ANDEAN ARC / CENTRAL ANDEAN VOLCANIC ZONE / CHILE / SAN PEDRO-SAN PABLO VOLCANIC COMPLEX		-21.8903	-21.8903	-68.4925	-68.4925	SAE			s_BG-SPL-015 [21117] / s_BG SPL 015 [18443]	ANDESITE [21117]	Pleistocene									VOL					WR [21117]	57.4	0.75		15.83				6.6	6.72	6.03	0.11		1.77	3.69	0.17
Andean Central Volcanic Arc Zones.csv	[23278]	10 CVZ	La Poruna	San Pedro-San Pablo	70	21	N Chile	ANDEAN ARC / CENTRAL ANDEAN VOLCANIC ZONE / CHILE / LA PORUNA		-21.8939	-21.8939	-68.5042	-68.5042	SAE			s_POR-06 [23278]	ANDESITE, BASALTIC [23278]					QUATERNARY [23278]					VOL					WR [23278]	55.61	0.75		15.98	0.05			6.83	7.1	6.08	0.12	0.01	1.69	3.54	0.19
Andean Central Volcanic Arc Zones.csv	[22067]	10 CVZ	Paniri	Paniri	71	21	N Chile	ANDEAN ARC / CENTRAL ANDEAN VOLCANIC ZONE / CHILE / PANIRI / LAS NEGRAS UNIT		-22.1119	-22.1119	-68.3108	-68.3108	SAE			s_PANI 12 13 [22067]	ANDESITE, BASALTIC [22067]	Pleistocene									VOL					WR [22067]	55.19	0.76		14.68				7.29	7.99	7.34	0.13		1.89	2.66	0.15
Andean Central Volcanic Arc Zones.csv	[3633]	10 CVZ	Cerro Overo	Cerro Overo	72	21	N Chile	ANDEAN ARC / CENTRAL ANDEAN VOLCANIC ZONE / ARGENTINA / CERRO OVERO	GUATAQUINA, SMALL MAAR RING	-23.52	-23.52	-68.32	-68.32	SAE			s_A791 [3633]	ANDESITE, BASALTIC [3633]	recent									VOL					WR [3633]	54.22	0.95		16.02				7.61	7.88	7.66	0.13		1.19	3.14	0.2	0.1
Andean Central Volcanic Arc Zones.csv	[13695]	10 CVZ	Negrillar	Negrillar	73	21	N Chile	ANDEAN ARC / CENTRAL ANDEAN VOLCANIC ZONE / CHILE / EL NEGRILLAR		-24.4706	-24.4706	-68.4522	-68.4522	SAE			s_NEGRITO-98-33 [13695]	ANDESITE, BASALTIC [13695]	Quaternary				QUATERNARY [13695]					VOL					WR [13695]	54.3	0.826		15.8				7.14	8.4	7.68	0.13		1.05	3.17	0.184
Andean Central Volcanic Arc Zones.csv	[5168]	10 CVZ	Corrida de Cori	Corrida de Cori	74	21	N Chile	ANDEAN ARC / CENTRAL ANDEAN VOLCANIC ZONE / ARGENTINA	CINDER CONE EAST OF CORRIDA DE CORI RANGE	-24.67	-25.17	-68.17	-68.58	SAE			s_AR63 [5168]	ANDESITE, BASALTIC [5168]	Quaternary			UPPER [5168]	QUATERNARY [5168]					VOL					WR [5168]	53.9	1.2		16.4				7.65	8	6.6	0.1		1.5	3.3	0.3
Andean Central Volcanic Arc Zones.csv	[5168]	10 CVZ	Corrida de Cori	Corrida de Cori	74	21	N Chile	ANDEAN ARC / CENTRAL ANDEAN VOLCANIC ZONE / ARGENTINA	CINDER CONE EAST OF CORRIDA DE CORI RANGE	-24.67	-25.17	-68.17	-68.58	SAE			s_AR86 [5168]	ANDESITE, BASALTIC [5168]	Quaternary			UPPER [5168]	QUATERNARY [5168]					VOL					WR [5168]	53.7	1.1		16.4				7.74	8	6.6	0.1		1.7	3.3	0.3
Andean Central Volcanic Arc Zones.csv	[9717]	6(10) CVZ rear-arc	Gemelos-Saladillo	Gemelos-Saladillo	75	22	N Chile rear-arc	ANDEAN ARC / CENTRAL ANDEAN VOLCANIC ZONE / ARGENTINA / EL SALADILLO	SALTA GROUP, PUNA CORDILLERA ORIENTAL BOUNDARY, NW-ARGENTINA	-24.5592	-24.5592	-66.1947	-66.1947	SAE			s_OSI 21 [9717]	SHOSHONITE [9717]	Quaternary				QUATERNARY [9717]					VOL					WR [9717]	54.54	1.15		14.39		6.93			6.29	7.76	0.11		3.98	2.69	0.67
Andean Central Volcanic Arc Zones.csv	[9717]	6(10) CVZ rear-arc	Gemelos-Saladillo	Gemelos-Saladillo	75	22	N Chile rear-arc	ANDEAN ARC / CENTRAL ANDEAN VOLCANIC ZONE / ARGENTINA / LOS GEMELOS	GEMELO SUR, PUNA CORDILLERA ORIENTAL BOUNDARY, NW-ARGENTINA	-24.7561	-24.7561	-66.1736	-66.1736	SAE			s_OSI 24 [9717]	SHOSHONITE [9717]	Quaternary				QUATERNARY [9717]					VOL					WR [9717]	53.35	1.42		13.9		7.95			7.09	7.58	0.11		3.96	3.05	0.9
Andean Central Volcanic Arc Zones.csv	[9717]	6(10) CVZ rear-arc	Gemelos-Saladillo	Gemelos-Saladillo	75	22	N Chile rear-arc	ANDEAN ARC / CENTRAL ANDEAN VOLCANIC ZONE / ARGENTINA / LOS GEMELOS	GEMELO SUR, PUNA CORDILLERA ORIENTAL BOUNDARY, NW-ARGENTINA	-24.7897	-24.7897	-66.1767	-66.1767	SAE			s_OSI 26 [9717]	SHOSHONITE [9717]	Quaternary				QUATERNARY [9717]					VOL					WR [9717]	53.26	1.4		13.95		7.77			7.18	7.32	0.12		3.99	3	0.89
Andean Central Volcanic Arc Zones.csv	[9717]	6(10) CVZ rear-arc	Gemelos-Saladillo	Gemelos-Saladillo	75	22	N Chile rear-arc	ANDEAN ARC / CENTRAL ANDEAN VOLCANIC ZONE / ARGENTINA / LOS GEMELOS	GEMELO NORTE, PUNA CORDILLERA ORIENTAL BOUNDARY, NW-ARGENTINA	-24.7469	-24.7469	-66.1769	-66.1769	SAE			s_OSI 25 [9717]	SHOSHONITE [9717]	Quaternary				QUATERNARY [9717]					VOL					WR [9717]	52.6	1.28		14.16		8.49			7.38	8.75	0.13		2.89	3.01	0.75
Andean Central Volcanic Arc Zones.csv	[3633]	6(10) CVZ rear-arc	Cerro Galan	Cerro Galan	76	22	N Chile rear-arc	ANDEAN ARC / CENTRAL ANDEAN VOLCANIC ZONE / ARGENTINA / CERRO GALAN		-26	-26	-67	-67	SAE			s_LO13 [3633]	ANDESITE, BASALTIC [3633]	recent									VOL					WR [3633]	52.41	2.02		16.25				8.34	6.93	6.03	0.14		2.5	3.95	0.49
Andean Central Volcanic Arc Zones.csv	[3633]	6(10) CVZ rear-arc	Cerro Galan	Cerro Galan	76	22	N Chile rear-arc	ANDEAN ARC / CENTRAL ANDEAN VOLCANIC ZONE / ARGENTINA / CERRO GALAN		-26	-26	-67	-67	SAE			s_LO34 [3633]	ANDESITE, BASALTIC [3633]	recent									VOL					WR [3633]	52.33	1.27		15.32				8.04	8.22	7.76	0.14		1.76	4.16	0.37	0.26
Andean Central Volcanic Arc Zones.csv	[9154]	6(10) CVZ rear-arc	Antofalla Volcanic Field	Antofalla Volcanic Field	77	22	N Chile rear-arc	ANDEAN ARC / CENTRAL ANDEAN VOLCANIC ZONE / ARGENTINA / ANTOFALLA VOLCANIC COMPLEX	QUATERNARY CINDER CONE	-25.6064	-25.6064	-68.0619	-68.0619	SAE			s_AR227 [9154]	ANDESITE, BASALTIC [9154]	early Pleistocene									VOL					WR [9154]	52.54	1.09		15.51		8.64			8.21	7.75	0.13		1.68	2.82	0.22
Andean Central Volcanic Arc Zones.csv	[9154]	6(10) CVZ rear-arc	Antofalla Volcanic Field	Antofalla Volcanic Field	77	22	N Chile rear-arc	ANDEAN ARC / CENTRAL ANDEAN VOLCANIC ZONE / ARGENTINA / ANTOFALLA VOLCANIC COMPLEX	QUATERNARY CINDER CONE	-25.6128	-25.6128	-68.0622	-68.0622	SAE			s_AR228 [9154]	ANDESITE, BASALTIC [9154]	Quaternary									VOL					WR [9154]	53.15	1.1		15.51		8.81			8	8.07	0.13		1.49	3.02	0.23
Andean Central Volcanic Arc Zones.csv	[17669]	6(10) CVZ rear-arc	Antofalla Volcanic Field	Antofalla Volcanic Field	77	22	N Chile rear-arc	ANDEAN ARC / CENTRAL ANDEAN VOLCANIC ZONE / ARGENTINA	SOUTHERN PUNA PLATEAU, BACK-ARC MAFIC SUITE	-25.974	-25.974	-67.538	-67.538	SAE			s_RAN1 [17669]	ANDESITE, BASALTIC [17669]	back-arc,4.6-<0.1Ma									VOL					WR [17669]	53.6	1.02		14.1		1.61	5.83		7.53	9.72	0.13		1.6	2.8	0.24
Andean Central Volcanic Arc Zones.csv	[17669]	6(10) CVZ rear-arc	Antofalla Volcanic Field	Antofalla Volcanic Field	77	22	N Chile rear-arc	ANDEAN ARC / CENTRAL ANDEAN VOLCANIC ZONE / ARGENTINA	SOUTHERN PUNA PLATEAU, BACK-ARC MAFIC SUITE	-25.992	-25.992	-67.543	-67.543	SAE			s_RAN2 [17669]	ANDESITE, BASALTIC [17669]	back-arc,4.6-<0.1Ma									VOL					WR [17669]	53.2	1.12		14.7		1.63	5.93		7.3	9.3	0.13		1.74	2.91	0.27
Andean Central Volcanic Arc Zones.csv	[17669]	6(10) CVZ rear-arc	Antofalla Volcanic Field	Antofalla Volcanic Field	77	22	N Chile rear-arc	ANDEAN ARC / CENTRAL ANDEAN VOLCANIC ZONE / ARGENTINA	SOUTHERN PUNA PLATEAU, BACK-ARC MAFIC SUITE	-26.117	-26.117	-67.423	-67.423	SAE			s_RAN3 [17669]	ANDESITE, BASALTIC [17669]	back-arc,4.6-<0.1Ma									VOL					WR [17669]	53.5	1.4		16.2		1.55	5.88		6.91	6.97	0.12		2.07	3.38	0.32
Andean Central Volcanic Arc Zones.csv	[17669]	6(10) CVZ rear-arc	Antofalla Volcanic Field	Antofalla Volcanic Field	77	22	N Chile rear-arc	ANDEAN ARC / CENTRAL ANDEAN VOLCANIC ZONE / ARGENTINA	SOUTHERN PUNA PLATEAU, BACK-ARC MAFIC SUITE	-26.152	-26.152	-67.427	-67.427	SAE			s_RAN4 [17669]	ANDESITE, BASALTIC [17669]	back-arc,4.6-<0.1Ma									VOL					WR [17669]	52.1	1.98		15.8		1.24	6.87		6.93	6.93	0.13		2.39	3.51	0.47
Andean Central Volcanic Arc Zones.csv	[17669]	6(10) CVZ rear-arc	Antofalla Volcanic Field	Antofalla Volcanic Field	77	22	N Chile rear-arc	ANDEAN ARC / CENTRAL ANDEAN VOLCANIC ZONE / ARGENTINA	SOUTHERN PUNA PLATEAU, BACK-ARC MAFIC SUITE	-26.293	-26.293	-67.409	-67.409	SAE			s_RAN5A [17669]	BASALT [17669]	back-arc,4.6-<0.1Ma									VOL					WR [17669]	51.7	1.38		14.9		1.93	5.83		7.9	9.02	0.14		2.04	3.27	0.42
Andean Central Volcanic Arc Zones.csv	[17669]	6(10) CVZ rear-arc	Antofalla Volcanic Field	Antofalla Volcanic Field	77	22	N Chile rear-arc	ANDEAN ARC / CENTRAL ANDEAN VOLCANIC ZONE / ARGENTINA	SOUTHERN PUNA PLATEAU, BACK-ARC MAFIC SUITE	-26.334	-26.334	-67.385	-67.385	SAE			s_RAN6 [17669]	BASALT [17669]	back-arc,4.6-<0.1Ma									VOL					WR [17669]	51.5	1.32		15.2		2.34	5.55		8.17	9	0.13		1.79	3.12	0.34
Andean Central Volcanic Arc Zones.csv	[17669]	6(10) CVZ rear-arc	Antofalla Volcanic Field	Antofalla Volcanic Field	77	22	N Chile rear-arc	ANDEAN ARC / CENTRAL ANDEAN VOLCANIC ZONE / ARGENTINA	SOUTHERN PUNA PLATEAU, BACK-ARC MAFIC SUITE	-26.363	-26.363	-67.372	-67.372	SAE			s_RAN7 [17669]	BASALT [17669]	back-arc,4.6-<0.1Ma									VOL					WR [17669]	51.5	1.41		15.2		2.07	6.01		7.69	8.83	0.13		1.77	3.19	0.32
Andean Central Volcanic Arc Zones.csv	[17669]	6(10) CVZ rear-arc	Antofalla Volcanic Field	Antofalla Volcanic Field	77	22	N Chile rear-arc	ANDEAN ARC / CENTRAL ANDEAN VOLCANIC ZONE / ARGENTINA	SOUTHERN PUNA PLATEAU, BACK-ARC MAFIC SUITE	-26.457	-26.457	-67.428	-67.428	SAE			s_RAN8A [17669]	BASALT [17669]	back-arc,4.6-<0.1Ma									VOL					WR [17669]	51.2	1.42		15.9		1.45	6.53		8.18	7.29	0.13		1.68	3.67	0.36
Andean Central Volcanic Arc Zones.csv	[17669]	6(10) CVZ rear-arc	Antofalla Volcanic Field	Antofalla Volcanic Field	77	22	N Chile rear-arc	ANDEAN ARC / CENTRAL ANDEAN VOLCANIC ZONE / ARGENTINA	SOUTHERN PUNA PLATEAU, BACK-ARC MAFIC SUITE	-26.707	-26.707	-67.246	-67.246	SAE			s_RAN9 [17669]	BASALT [17669]	back-arc,4.6-<0.1Ma									VOL					WR [17669]	50.2	1.22		14.7		4.75	3.72		8.87	9.27	0.15		1.76	3.4	0.48
Andean Central Volcanic Arc Zones.csv	[17669]	6(10) CVZ rear-arc	Antofalla Volcanic Field	Antofalla Volcanic Field	77	22	N Chile rear-arc	ANDEAN ARC / CENTRAL ANDEAN VOLCANIC ZONE / ARGENTINA	SOUTHERN PUNA PLATEAU, BACK-ARC MAFIC SUITE	-26.032	-26.032	-67.445	-67.445	SAE			s_RAN10 [17669]	ANDESITE, BASALTIC [17669]	back-arc,4.6-<0.1Ma									VOL					WR [17669]	53.2	1.25		14.9		3.31	3.94		8.49	6.79	0.11		1.97	3.42	0.49
Andean Central Volcanic Arc Zones.csv	[17669]	6(10) CVZ rear-arc	Antofalla Volcanic Field	Antofalla Volcanic Field	77	22	N Chile rear-arc	ANDEAN ARC / CENTRAL ANDEAN VOLCANIC ZONE / ARGENTINA	SOUTHERN PUNA PLATEAU, BACK-ARC MAFIC SUITE	-26.65	-26.65	-67.87	-67.87	SAE			s_SAF76 [17669]	ANDESITE, BASALTIC [17669]	back-arc,4.6-<0.1Ma									VOL					WR [17669]	54.5	1.31		15.4		1.62	5.63		6.92	6.82	0.12		2.37	3.31	0.32
Andean Central Volcanic Arc Zones.csv	[17669]	6(10) CVZ rear-arc	Antofalla Volcanic Field	Antofalla Volcanic Field	77	22	N Chile rear-arc	ANDEAN ARC / CENTRAL ANDEAN VOLCANIC ZONE / ARGENTINA	SOUTHERN PUNA PLATEAU, BACK-ARC MAFIC SUITE	-25.868	-25.868	-67.416	-67.416	SAE			s_SAF201 [17669]	ANDESITE, BASALTIC [17669]	back-arc,4.6-<0.1Ma									VOL					WR [17669]	53.1	1.14		15.7		1.99	5.8		7.7	7.54	0.13		1.82	2.73	0.2
Andean Central Volcanic Arc Zones.csv	[17669]	6(10) CVZ rear-arc	Antofalla Volcanic Field	Antofalla Volcanic Field	77	22	N Chile rear-arc	ANDEAN ARC / CENTRAL ANDEAN VOLCANIC ZONE / ARGENTINA	SOUTHERN PUNA PLATEAU, BACK-ARC MAFIC SUITE	-25.87	-25.87	-67.436	-67.436	SAE			s_SAF202 [17669]	ANDESITE, BASALTIC [17669]	back-arc,4.6-<0.1Ma									VOL					WR [17669]	53.5	1.28		15.8		1.43	6.51		7.52	7.22	0.13		1.91	2.74	0.21
Andean Central Volcanic Arc Zones.csv	[17669]	6(10) CVZ rear-arc	Antofalla Volcanic Field	Antofalla Volcanic Field	77	22	N Chile rear-arc	ANDEAN ARC / CENTRAL ANDEAN VOLCANIC ZONE / ARGENTINA	SOUTHERN PUNA PLATEAU, BACK-ARC MAFIC SUITE	-25.926	-25.926	-67.489	-67.489	SAE			s_SAF206 [17669]	ANDESITE, BASALTIC [17669]	back-arc,4.6-<0.1Ma									VOL					WR [17669]	53	1.2		16.1		2.4	5.4		7.8	7.4	0.13		1.8	2.9	0.2
Andean Central Volcanic Arc Zones.csv	[17669]	6(10) CVZ rear-arc	Antofalla Volcanic Field	Antofalla Volcanic Field	77	22	N Chile rear-arc	ANDEAN ARC / CENTRAL ANDEAN VOLCANIC ZONE / ARGENTINA	SOUTHERN PUNA PLATEAU, BACK-ARC MAFIC SUITE	-25.853	-25.853	-67.31	-67.31	SAE			s_SAF207 [17669]	ANDESITE, BASALTIC [17669]	back-arc,4.6-<0.1Ma									VOL					WR [17669]	55.7	1.13		14.6		1.79	4.9		6.18	7.86	0.11		2.54	2.59	0.28
Andean Central Volcanic Arc Zones.csv	[17669]	6(10) CVZ rear-arc	Antofalla Volcanic Field	Antofalla Volcanic Field	77	22	N Chile rear-arc	ANDEAN ARC / CENTRAL ANDEAN VOLCANIC ZONE / ARGENTINA	SOUTHERN PUNA PLATEAU, BACK-ARC MAFIC SUITE	-25.83	-25.83	-67.287	-67.287	SAE			s_SAF208 [17669]	ANDESITE, BASALTIC [17669]	back-arc,4.6-<0.1Ma									VOL					WR [17669]	54.3	1.29		15.5		2.08	5.34		7.19	7.13	0.12		1.97	3.07	0.29
Andean Central Volcanic Arc Zones.csv	[17669]	6(10) CVZ rear-arc	Antofalla Volcanic Field	Antofalla Volcanic Field	77	22	N Chile rear-arc	ANDEAN ARC / CENTRAL ANDEAN VOLCANIC ZONE / ARGENTINA	SOUTHERN PUNA PLATEAU, BACK-ARC MAFIC SUITE	-25.216	-25.216	-67.029	-67.029	SAE			s_SAF214 [17669]	ANDESITE, BASALTIC [17669]	back-arc,4.6-<0.1Ma									VOL					WR [17669]	54.7	1.2		15.7		1.74	5.39		6.97	6.6	0.11		1.76	3.01	0.25
Andean Central Volcanic Arc Zones.csv	[17669]	6(10) CVZ rear-arc	Antofalla Volcanic Field	Antofalla Volcanic Field	77	22	N Chile rear-arc	ANDEAN ARC / CENTRAL ANDEAN VOLCANIC ZONE / ARGENTINA	SOUTHERN PUNA PLATEAU, BACK-ARC MAFIC SUITE	-25.265	-25.265	-67.052	-67.052	SAE			s_SAF215 [17669]	ANDESITE, BASALTIC [17669]	back-arc,4.6-<0.1Ma									VOL					WR [17669]	52.9	1.18		15.6		1.7	5.93		7.58	7.97	0.12		1.62	2.93	0.22
Andean Central Volcanic Arc Zones.csv	[17669]	6(10) CVZ rear-arc	Antofalla Volcanic Field	Antofalla Volcanic Field	77	22	N Chile rear-arc	ANDEAN ARC / CENTRAL ANDEAN VOLCANIC ZONE / ARGENTINA	SOUTHERN PUNA PLATEAU, BACK-ARC MAFIC SUITE	-25.245	-25.245	-67.048	-67.048	SAE			s_SAF217 [17669]	ANDESITE, BASALTIC [17669]	back-arc,4.6-<0.1Ma									VOL					WR [17669]	53.2	1.13		15.6		1.73	5.63		7.8	7.62	0.12		1.6	2.86	0.22
Andean Central Volcanic Arc Zones.csv	[17669]	6(10) CVZ rear-arc	Antofalla Volcanic Field	Antofalla Volcanic Field	77	22	N Chile rear-arc	ANDEAN ARC / CENTRAL ANDEAN VOLCANIC ZONE / ARGENTINA	SOUTHERN PUNA PLATEAU, BACK-ARC MAFIC SUITE	-26.306	-26.306	-67.39	-67.39	SAE			s_SAF218 [17669]	BASALT [17669]	back-arc,4.6-<0.1Ma									VOL					WR [17669]	51.4	1.42		15.1		3.32	4.81		8.4	7.82	0.13		1.83	2.94	0.37
Andean Central Volcanic Arc Zones.csv	[17669]	6(10) CVZ rear-arc	Antofalla Volcanic Field	Antofalla Volcanic Field	77	22	N Chile rear-arc	ANDEAN ARC / CENTRAL ANDEAN VOLCANIC ZONE / ARGENTINA	SOUTHERN PUNA PLATEAU, BACK-ARC MAFIC SUITE	-26.357	-26.357	-67.375	-67.375	SAE			s_SAF220 [17669]	BASALT [17669]	back-arc,4.6-<0.1Ma									VOL					WR [17669]	51.3	1.42		15.3		2.14	5.98		7.81	8.48	0.13		1.82	3.06	0.3
Andean Central Volcanic Arc Zones.csv	[17669]	6(10) CVZ rear-arc	Antofalla Volcanic Field	Antofalla Volcanic Field	77	22	N Chile rear-arc	ANDEAN ARC / CENTRAL ANDEAN VOLCANIC ZONE / ARGENTINA	SOUTHERN PUNA PLATEAU, BACK-ARC MAFIC SUITE	-26.407	-26.407	-67.249	-67.249	SAE			s_SAF221 [17669]	ANDESITE, BASALTIC [17669]	back-arc,4.6-<0.1Ma									VOL					WR [17669]	55.3	0.91		15.6		2.21	4.24		6.95	6.35	0.12		2.56	3.44	0.24
Andean Central Volcanic Arc Zones.csv	[17669]	6(10) CVZ rear-arc	Antofalla Volcanic Field	Antofalla Volcanic Field	77	22	N Chile rear-arc	ANDEAN ARC / CENTRAL ANDEAN VOLCANIC ZONE / ARGENTINA	SOUTHERN PUNA PLATEAU, BACK-ARC MAFIC SUITE	-26.7	-26.7	-67.26	-67.26	SAE			s_RP1997 [17669]	BASALT [17669]	back-arc,4.6-<0.1Ma									VOL					WR [17669]	50.8	1.2		15.1		5.42	2.62		8.84	8.38	0.15		1.95	3.54	0.56
Andean Central Volcanic Arc Zones.csv	[17669]	6(10) CVZ rear-arc	Antofalla Volcanic Field	Antofalla Volcanic Field	77	22	N Chile rear-arc	ANDEAN ARC / CENTRAL ANDEAN VOLCANIC ZONE / ARGENTINA	SOUTHERN PUNA PLATEAU, BACK-ARC MAFIC SUITE	-26.372	-26.372	-68.07	-68.07	SAE			s_CO99 [17669]	ANDESITE, BASALTIC [17669]	back-arc,4.6-<0.1Ma									VOL					WR [17669]	52.2	1.16		16.1		1.83	5.68		7.91	6.94	0.13		1.77	3.66	0.25
Andean Southern Volcanic Arc Zones.csv	[5180]	11 SVZ	SAN PEDRO-PELLADO	San Pedro-Pellado	78	23	C Chile	ANDEAN ARC / SOUTHERN ANDEAN VOLCANIC ZONE / CHILE / SAN PEDRO-PELLADO/TATARA		-36	-36	-70.83	-70.83	SAE			s_H-23I [5180]	NOT GIVEN [5180]	Holocene				HOLOCENE [5180]					VOL					WR [5180]	52.4	0.99		17.24				8.48	8.07	7.42	0.15		1.09	3.27	0.22
Andean Southern Volcanic Arc Zones.csv	[4347]	11 SVZ	SAN PEDRO-PELLADO	San Pedro-Pellado	78	23	C Chile	ANDEAN ARC / SOUTHERN ANDEAN VOLCANIC ZONE / CHILE / SAN PEDRO-PELLADO/TATARA / GUADAL FORMATION	CORDON EL GUADAL	-36	-36	-70.5	-70.5	SAE			s_GUA14 [4347]	ANDESITE [4347]	Pleistocene-active	Pleistocene-active								VOL					WR [4347]	51.3	1.07		17.58				8.9	8.64	6.74	0.16		0.86	3.59	0.22
Andean Southern Volcanic Arc Zones.csv	[10905]	11 SVZ	Nevado De Longavi	Nevado De Longavi	79	23	C Chile	ANDEAN ARC / SOUTHERN ANDEAN VOLCANIC ZONE / CHILE / NEVADO DE LONGAVI		-36.2	-36.2	-71.27	-71.27	SAE			s_MADINCL3-13.4 [10905]	NOT GIVEN [10905]	Holocene				HOLOCENE [10905]					VOL					WR [10905]	54.24	0.89		17.61	0.03			7.24	8.2	6.12	0.13	0.01	0.63	3.48	0.16
Andean Southern Volcanic Arc Zones.csv	[21645]	11 SVZ	Antuco	Antuco	80	23	C Chile	ANDEAN ARC / SOUTHERN ANDEAN VOLCANIC ZONE / CHILE / ANTUCO	1853 ERUPTION	-37.41	-37.41	-71.35	-71.35	SAE			s_010283-03 [21645]	BASALT [21645]	<150ka	<150ka								VOL					WR [21645]	50.88	0.98		17.68				8.65	8.8	7.46	0.14		0.79	3.33	0.21
Andean Southern Volcanic Arc Zones.csv	[21645]	11 SVZ	Antuco	Antuco	80	23	C Chile	ANDEAN ARC / SOUTHERN ANDEAN VOLCANIC ZONE / CHILE / ANTUCO		-37.4442	-37.4442	-71.3249	-71.3249	SAE			s_130413-2 [21645]	ANDESITE, BASALTIC [21645]	42ka	42ka								VOL					WR [21645]	52.03	0.89		18.85				7.61	9.07	6.21	0.129		0.86	3.57	0.157
Andean Southern Volcanic Arc Zones.csv	[4232][12800][5033]	11 SVZ	Antuco	Antuco	80	23	C Chile	ANDEAN ARC / SOUTHERN ANDEAN VOLCANIC ZONE / CHILE / ANTUCO		-37.406	-37.406	-71.349	-71.349	SAE			s_17L [4232]	NOT GIVEN [4232] / BASALT [12800]	late Pleistocene–recent									VOL					WR [4232]	49.91	0.99		18.5				8.76	9.25	7.06	0.15		0.64	3.26	0.15
Andean Southern Volcanic Arc Zones.csv	[4380][3631][20337]	11 SVZ	Antuco	Antuco	80	23	C Chile	ANDEAN ARC / SOUTHERN ANDEAN VOLCANIC ZONE / CHILE / ANTUCO		-37.406	-37.406	-71.349	-71.349	SAE			s_511777 [4380] / s_51177-7 [20337]	NOT GIVEN [4380] / BASALT [3631] / ANDESITE, BASALTIC [20337]	late Pleistocene–recent									VOL					WR [4380]	52.86	0.99		17.22		2.9	6.85		8.15	6.78	0.17		0.67	3.43	0.23	0.2
Andean Southern Volcanic Arc Zones.csv	[23172]	11 SVZ	Antuco	Antuco	80	23	C Chile	ANDEAN ARC / SOUTHERN ANDEAN VOLCANIC ZONE / CHILE / ANTUCO		-37.41	-37.41	-71.3	-71.3	SAE			s_AN27-8 [23172]	ANDESITE, BASALTIC [23172]	Pleistocene				PLEISTOCENE-HOLOCENE [23172]				PORPHYRITIC [23172]	VOL					WR [23172]	53.299	0.8491		18.149				7.32	8.782	6.025	0.1334		1.009	3.194	0.152
Andean Southern Volcanic Arc Zones.csv	[23172]	11 SVZ	Antuco	Antuco	80	23	C Chile	ANDEAN ARC / SOUTHERN ANDEAN VOLCANIC ZONE / CHILE / ANTUCO		-37.46	-37.46	-71.32	-71.32	SAE			s_AN27-7 [23172]	ANDESITE, BASALTIC [23172]	Pleistocene				PLEISTOCENE-HOLOCENE [23172]				PORPHYRITIC [23172]	VOL					WR [23172]	53.283	1.0256		17.498				8.1	8.753	6.764	0.1402		0.835	3.389	0.21
Andean Southern Volcanic Arc Zones.csv	[20337]	11 SVZ	Llaima	Llaima	81	24	SC Chile	ANDEAN ARC / SOUTHERN ANDEAN VOLCANIC ZONE / CHILE / LLAIMA		-38.4	-38.4	-71.6	-71.6	SAE			s_5381-3 [20337]	ANDESITE, BASALTIC [20337]	Pleistocene-active									VOL					WR [20337]	52.01	1.02		17.82				8.76	9.62	6.09	0.15		0.61	3.11	0.17	0.12
Andean Southern Volcanic Arc Zones.csv	[20337]	11 SVZ	Llaima	Llaima	81	24	SC Chile	ANDEAN ARC / SOUTHERN ANDEAN VOLCANIC ZONE / CHILE / LLAIMA		-38.4	-38.4	-71.6	-71.6	SAE			s_260483-1 [20337]	ANDESITE, BASALTIC [20337]	Pleistocene-active									VOL					WR [20337]	52.11	1.02		17.67				8.95	9.55	6.01	0.16		0.59	3.14	0.17	0.17
Andean Southern Volcanic Arc Zones.csv	[22571]	11 SVZ	Llaima	Llaima	81	24	SC Chile	ANDEAN ARC / SOUTHERN ANDEAN VOLCANIC ZONE / CHILE / LLAIMA	SATELLITE SCORIA CONE	-38.7223	-38.7223	-71.7817	-71.7817	SAE			s_LLA-12-52B [22571]	BASALT [22571]	recent								GLOMEROPORPHYRITIC [22571]	VOL					WR [22571]	51.49	0.92		17.94				8.58	9.96	6.09	0.16		0.56	2.89	0.15
Andean Southern Volcanic Arc Zones.csv	[15251]	11 SVZ	Llaima	Llaima	81	24	SC Chile	ANDEAN ARC / SOUTHERN ANDEAN VOLCANIC ZONE / CHILE / LLAIMA		-38.4	-38.4	-71.6	-71.6	SAE			s_19 [15251]	NOT GIVEN [15251]	Pleistocene-active							1780		VOL					WR [15251]	51.6	1.01		17.7				9	9.66	6.16	0.16		0.57	2.98	0.18
Andean Southern Volcanic Arc Zones.csv	[15251]	11 SVZ	Llaima	Llaima	81	24	SC Chile	ANDEAN ARC / SOUTHERN ANDEAN VOLCANIC ZONE / CHILE / LLAIMA		-38.4	-38.4	-71.6	-71.6	SAE			s_7 [15251]	NOT GIVEN [15251]	Pleistocene-active							1751		VOL					WR [15251]	51.6	1.03		17.6				9.09	9.57	6.15	0.16		0.59	3.03	0.18
Andean Southern Volcanic Arc Zones.csv	[19914]	11 SVZ	Caburgua	Caburgua	82	24	SC Chile	ANDEAN ARC / SOUTHERN ANDEAN VOLCANIC ZONE / CHILE / CABURGUA(CABURGA)		-39.17	-39.2	-71.82	-71.85	SAE			s_CAB1-1 [19914]	BASALT [19914]	Holocene									VOL					WR [19914]	50.26	1.116		17.48		6.6	2.97		8.68	6.8	0.149		0.75	3.3	0.29
Andean Southern Volcanic Arc Zones.csv	[19914]	11 SVZ	Caburgua	Caburgua	82	24	SC Chile	ANDEAN ARC / SOUTHERN ANDEAN VOLCANIC ZONE / CHILE / CABURGUA(CABURGA)		-39.17	-39.2	-71.82	-71.85	SAE			s_CAB1-2 [19914]	BASALT [19914]	Holocene									VOL					WR [19914]	49.88	1.108		17.5		5.7	3.72		8.92	6.71	0.149		0.68	3.22	0.31
Andean Southern Volcanic Arc Zones.csv	[19914]	11 SVZ	Caburgua	Caburgua	82	24	SC Chile	ANDEAN ARC / SOUTHERN ANDEAN VOLCANIC ZONE / CHILE / CABURGUA(CABURGA)		-39.17	-39.2	-71.82	-71.85	SAE			s_CAB2-1 [19914]	BASALT [19914]	Holocene									VOL					WR [19914]	50.24	1.144		17.5		7.2	2.45		8.79	6.33	0.15		0.82	3.34	0.34
Andean Southern Volcanic Arc Zones.csv	[19914]	11 SVZ	Caburgua	Caburgua	82	24	SC Chile	ANDEAN ARC / SOUTHERN ANDEAN VOLCANIC ZONE / CHILE / CABURGUA(CABURGA)		-39.17	-39.2	-71.82	-71.85	SAE			s_CAB2-2 [19914]	BASALT [19914]	Holocene									VOL					WR [19914]	51.31	1.13		17.45		5.8	4.33		8.84	7.45	0.156		0.75	3.33	0.33
Andean Southern Volcanic Arc Zones.csv	[19914]	11 SVZ	Caburgua	Caburgua	82	24	SC Chile	ANDEAN ARC / SOUTHERN ANDEAN VOLCANIC ZONE / CHILE / CABURGUA(CABURGA)		-39.17	-39.2	-71.82	-71.85	SAE			s_CAB3-1 [19914]	BASALT [19914]	Holocene									VOL					WR [19914]	50.78	1.14		17.56		7.4	2.38		8.72	7.06	0.154		0.8	3.37	0.34
Andean Southern Volcanic Arc Zones.csv	[20346]	11 SVZ	Caburgua	Caburgua	82	24	SC Chile	ANDEAN ARC / SOUTHERN ANDEAN VOLCANIC ZONE / CHILE / CABURGUA(CABURGA)		-39.17	-39.17	-71.53	-71.53	SAE			s_120194-4A [20346]	BASALT [20346]	Pleistocene-active									VOL					WR [20346]	51.51	1.13		18.25				8.45	9.16	6.15	0.15		0.83	3.57	0.31
Andean Southern Volcanic Arc Zones.csv	[20346]	11 SVZ	Caburgua	Caburgua	82	24	SC Chile	ANDEAN ARC / SOUTHERN ANDEAN VOLCANIC ZONE / CHILE / CABURGUA(CABURGA)		-39.17	-39.17	-71.53	-71.53	SAE			s_120194-4C [20346]	BASALT [20346]	Pleistocene-active									VOL					WR [20346]	51.59	1.1		17.93				8.6	9.16	6.68	0.15		0.8	3.55	0.31
Andean Southern Volcanic Arc Zones.csv	[20346]	11 SVZ	Caburgua	Caburgua	82	24	SC Chile	ANDEAN ARC / SOUTHERN ANDEAN VOLCANIC ZONE / CHILE / CABURGUA(CABURGA)		-39.17	-39.17	-71.53	-71.53	SAE			s_120194-5 [20346]	BASALT [20346]	Pleistocene-active									VOL					WR [20346]	51.38	1.1		18.1				8.4	9.19	6.54	0.15		0.77	3.42	0.3
Andean Southern Volcanic Arc Zones.csv	[20346]	11 SVZ	Caburgua	Caburgua	82	24	SC Chile	ANDEAN ARC / SOUTHERN ANDEAN VOLCANIC ZONE / CHILE / CABURGUA(CABURGA)		-39.17	-39.17	-71.53	-71.53	SAE			s_150104-1 [20346]	BASALT [20346]	Pleistocene-active									VOL					WR [20346]	50.91	1.1		18.15				8.37	9.18	6.45	0.15		0.71	3.48	0.31
Andean Southern Volcanic Arc Zones.csv	[20346]	11 SVZ	Caburgua	Caburgua	82	24	SC Chile	ANDEAN ARC / SOUTHERN ANDEAN VOLCANIC ZONE / CHILE / CABURGUA(CABURGA)		-39.17	-39.17	-71.53	-71.53	SAE			s_150194-3 [20346]	BASALT [20346]	Pleistocene-active									VOL					WR [20346]	51.28	1.1		17.92				8.65	9.36	6.32	0.16		0.71	2.69	0.3
Andean Southern Volcanic Arc Zones.csv	[20346]	11 SVZ	Caburgua	Caburgua	82	24	SC Chile	ANDEAN ARC / SOUTHERN ANDEAN VOLCANIC ZONE / CHILE / CABURGUA(CABURGA)		-39.17	-39.17	-71.53	-71.53	SAE			s_CB SC 1208A [20346]	BASALT [20346]	Pleistocene-active									VOL					WR [20346]	51.56	1.22		17.81				8.28	8.49	7.04	0.17		0.77	3.38	0.35
Andean Southern Volcanic Arc Zones.csv	[20346]	11 SVZ	Caburgua	Caburgua	82	24	SC Chile	ANDEAN ARC / SOUTHERN ANDEAN VOLCANIC ZONE / CHILE / CABURGUA(CABURGA)		-39.17	-39.17	-71.53	-71.53	SAE			s_CB SC 1208B [20346]	ANDESITE, BASALTIC [20346]	Pleistocene-active									VOL					WR [20346]	52.34	1.15		17.41				8.12	8.61	7.07	0.16		0.73	3.21	0.31
Andean Southern Volcanic Arc Zones.csv	[20346]	11 SVZ	Caburgua	Caburgua	82	24	SC Chile	ANDEAN ARC / SOUTHERN ANDEAN VOLCANIC ZONE / CHILE / CABURGUA(CABURGA)		-39.17	-39.17	-71.53	-71.53	SAE			s_CB LA 1208C [20346]	BASALT [20346]	Pleistocene-active									VOL					WR [20346]	51.62	1.16		18.03				8.56	8.93	6.81	0.16		0.72	3.63	0.34
Andean Southern Volcanic Arc Zones.csv	[3831]	11 SVZ	Caburgua	Caburgua	82	24	SC Chile	ANDEAN ARC / SOUTHERN ANDEAN VOLCANIC ZONE / CHILE / CABURGUA(CABURGA)	CABURGA (CABURGUA) BASALTIC CONES	-39.18	-39.18	-71.83	-71.83	SAE			s_CA-1 [3831]	BASALT [3831]	Pleistocene-active									VOL					WR [3831]	50.72	1.1		17.66		9.38			9.61	7.1	0.14		0.66	3.26	0.27
Andean Southern Volcanic Arc Zones.csv	[3831]	11 SVZ	Caburgua	Caburgua	82	24	SC Chile	ANDEAN ARC / SOUTHERN ANDEAN VOLCANIC ZONE / CHILE / CABURGUA(CABURGA)	CABURGA (CABURGUA) BASALTIC CONES	-39.18	-39.18	-71.83	-71.83	SAE			s_CA-2 [3831]	BASALT [3831]	Pleistocene-active									VOL					WR [3831]	50.95	1.13		17.92		9.28			9.05	6.72	0.14		0.73	3.54	0.32
Andean Southern Volcanic Arc Zones.csv	[21041]	11 SVZ	Caburgua	Caburgua	82	24	SC Chile	ANDEAN ARC / SOUTHERN ANDEAN VOLCANIC ZONE / CHILE / CABURGUA(CABURGA)	CINDER CONE	-39.2	-39.2	-71.82	-71.82	SAE			s_LEM-CB-5 [21041]	BASALT [21041]	Holocene									VOL					WR [21041]	50.18	1.099		17.38				8.76	8.3	8.07	0.163		0.66	3.17	0.27
Andean Southern Volcanic Arc Zones.csv	[21041]	11 SVZ	Caburgua	Caburgua	82	24	SC Chile	ANDEAN ARC / SOUTHERN ANDEAN VOLCANIC ZONE / CHILE / CABURGUA(CABURGA)	CINDER CONE	-39.2	-39.2	-71.82	-71.82	SAE			s_LEM-CB-6 [21041]	BASALT [21041]	Holocene									VOL					WR [21041]	49.8	1.133		17.92				8.94	8.38	8.09	0.162		0.63	3.17	0.27
Andean Southern Volcanic Arc Zones.csv	[21041]	11 SVZ	Caburgua	Caburgua	82	24	SC Chile	ANDEAN ARC / SOUTHERN ANDEAN VOLCANIC ZONE / CHILE / CABURGUA(CABURGA)	CINDER CONE	-39.2	-39.2	-71.82	-71.82	SAE			s_LEM-CB-7 [21041]	BASALT [21041]	Holocene									VOL					WR [21041]	51.48	1.021		16.51				8.16	8.06	8.27	0.147		0.68	3.16	0.26
Andean Southern Volcanic Arc Zones.csv	[21041]	11 SVZ	Caburgua	Caburgua	82	24	SC Chile	ANDEAN ARC / SOUTHERN ANDEAN VOLCANIC ZONE / CHILE / CABURGUA(CABURGA)	CINDER CONE	-39.2	-39.2	-71.82	-71.82	SAE			s_LEM-CB-10 [21041]	ANDESITE, BASALTIC [21041]	Holocene									VOL					WR [21041]	52.81	1.072		16.55				8.37	8.41	6.77	0.15		0.71	3.12	0.3
Andean Southern Volcanic Arc Zones.csv	[21041]	11 SVZ	Caburgua	Caburgua	82	24	SC Chile	ANDEAN ARC / SOUTHERN ANDEAN VOLCANIC ZONE / CHILE / CABURGUA(CABURGA)	CINDER CONE	-39.2	-39.2	-71.82	-71.82	SAE			s_CAB1-1 [21041]	BASALT [21041]	Holocene									VOL					WR [21041]	50.26	1.116		17.48				8.61	8.68	6.8	0.149		0.75	3.3	0.29
Andean Southern Volcanic Arc Zones.csv	[21041]	11 SVZ	Caburgua	Caburgua	82	24	SC Chile	ANDEAN ARC / SOUTHERN ANDEAN VOLCANIC ZONE / CHILE / CABURGUA(CABURGA)	CINDER CONE	-39.2	-39.2	-71.82	-71.82	SAE			s_CAB2-1 [21041]	BASALT [21041]	Holocene									VOL					WR [21041]	50.24	1.144		17.5				8.68	8.79	6.33	0.15		0.82	3.34	0.34
Andean Southern Volcanic Arc Zones.csv	[21041]	11 SVZ	Caburgua	Caburgua	82	24	SC Chile	ANDEAN ARC / SOUTHERN ANDEAN VOLCANIC ZONE / CHILE / CABURGUA(CABURGA)	CINDER CONE	-39.2	-39.2	-71.82	-71.82	SAE			s_CAB2-2 [21041]	BASALT [21041]	Holocene									VOL					WR [21041]	51.31	1.13		17.45				9.12	8.84	7.45	0.156		0.75	3.33	0.33
Andean Southern Volcanic Arc Zones.csv	[21041]	11 SVZ	Caburgua	Caburgua	82	24	SC Chile	ANDEAN ARC / SOUTHERN ANDEAN VOLCANIC ZONE / CHILE / CABURGUA(CABURGA)	CINDER CONE	-39.2	-39.2	-71.82	-71.82	SAE			s_CAB3-1 [21041]	BASALT [21041]	Holocene									VOL					WR [21041]	50.78	1.14		17.56				8.8	8.72	7.06	0.154		0.8	3.37	0.34
Andean Southern Volcanic Arc Zones.csv	[20346]	11 SVZ	Redondo	Caburgua	82	24	SC Chile	ANDEAN ARC / SOUTHERN ANDEAN VOLCANIC ZONE / CHILE / REDONDO		-39.27	-39.28	-71.72	-71.72	SAE			s_140194-10 [20346]	BASALT [20346]	Pleistocene-active									VOL					WR [20346]	51.56	1		17.93				8.58	9.13	6.1	0.15		0.77	2.48	0.3
Andean Southern Volcanic Arc Zones.csv	[19914]	11 SVZ	Redondo	Caburgua	82	24	SC Chile	ANDEAN ARC / SOUTHERN ANDEAN VOLCANIC ZONE / CHILE / REDONDO		-39.27	-39.28	-71.72	-71.72	SAE			s_RED-5 [19914]	BASALT [19914]	Holocene									VOL					WR [19914]	50.87	0.994		17.24		7.9	2.01		9.07	7.35	0.153		0.79	3.08	0.29
Andean Southern Volcanic Arc Zones.csv	[20346]	11 SVZ	Redondo	Caburgua	82	24	SC Chile	ANDEAN ARC / SOUTHERN ANDEAN VOLCANIC ZONE / CHILE / REDONDO		-39.27	-39.28	-71.72	-71.72	SAE			s_140194-9 [20346]	BASALT [20346]	Pleistocene-active									VOL					WR [20346]	51.55	1.01		17.96				8.43	8.83	6.49	0.15		0.84	3.32	0.31
Andean Southern Volcanic Arc Zones.csv	[19914]	11 SVZ	La Barda	Caburgua	82	24	SC Chile	ANDEAN ARC / SOUTHERN ANDEAN VOLCANIC ZONE / CHILE / LA BARDA		-39.22	-39.22	-71.79	-71.79	SAE			s_BARDA1-2 [19914]	BASALT [19914]	Holocene									VOL					WR [19914]	50.45	1.077		16.82		6.9	3.09		9.07	7.59	0.154		0.74	3.13	0.33
Andean Southern Volcanic Arc Zones.csv	[20346]	11 SVZ	La Barda	Caburgua	82	24	SC Chile	ANDEAN ARC / SOUTHERN ANDEAN VOLCANIC ZONE / CHILE / LA BARDA		-39.2	-39.2	-71.8	-71.8	SAE			s_150194-5B [20346]	BASALT [20346]	Pleistocene-active									VOL					WR [20346]	50.77	1.05		17.34				8.6	9.26	7.33	0.16		0.75	3.23	0.3
Andean Southern Volcanic Arc Zones.csv	[20346]	11 SVZ	La Barda	Caburgua	82	24	SC Chile	ANDEAN ARC / SOUTHERN ANDEAN VOLCANIC ZONE / CHILE / LA BARDA		-39.2	-39.2	-71.8	-71.8	SAE			s_150194-5A [20346]	BASALT [20346]	Pleistocene-active									VOL					WR [20346]	50.65	1.06		17.37				8.73	9.32	7.32	0.16		0.73	3.25	0.29
Andean Southern Volcanic Arc Zones.csv	[21041]	11 SVZ	La Barda	Caburgua	82	24	SC Chile	ANDEAN ARC / SOUTHERN ANDEAN VOLCANIC ZONE / CHILE / LA BARDA		-39.22	-39.22	-71.79	-71.79	SAE			s_LEM-14 [21041]	BASALT [21041]	Holocene									VOL					WR [21041]	50.72	1.039		16.94				8.73	9.24	7.04	0.153		0.69	2.97	0.31
Andean Southern Volcanic Arc Zones.csv	[21041]	11 SVZ	La Barda	Caburgua	82	24	SC Chile	ANDEAN ARC / SOUTHERN ANDEAN VOLCANIC ZONE / CHILE / LA BARDA		-39.22	-39.22	-71.79	-71.79	SAE			s_LEM-16 [21041]	BASALT [21041]	Holocene									VOL					WR [21041]	50.81	1.055		17.18				8.83	9.3	7.37	0.155		0.65	3.14	0.33
Andean Southern Volcanic Arc Zones.csv	[21041]	11 SVZ	La Barda	Caburgua	82	24	SC Chile	ANDEAN ARC / SOUTHERN ANDEAN VOLCANIC ZONE / CHILE / LA BARDA		-39.22	-39.22	-71.79	-71.79	SAE			s_LEM-17 [21041]	BASALT [21041]	Holocene									VOL					WR [21041]	49.82	1.058		17.17				9.12	9.34	7.34	0.154		0.63	3.12	0.32
Andean Southern Volcanic Arc Zones.csv	[21041]	11 SVZ	La Barda	Caburgua	82	24	SC Chile	ANDEAN ARC / SOUTHERN ANDEAN VOLCANIC ZONE / CHILE / LA BARDA		-39.22	-39.22	-71.79	-71.79	SAE			s_LEM-19 [21041]	BASALT [21041]	Holocene									VOL					WR [21041]	50.87	1.059		17.48				9.43	9.36	7.13	0.157		0.66	2.98	0.33
Andean Southern Volcanic Arc Zones.csv	[21041]	11 SVZ	La Barda	Caburgua	82	24	SC Chile	ANDEAN ARC / SOUTHERN ANDEAN VOLCANIC ZONE / CHILE / LA BARDA		-39.22	-39.22	-71.79	-71.79	SAE			s_LEM-20 [21041]	BASALT [21041]	Holocene									VOL					WR [21041]	49.63	1.084		17.82				8.8	9.16	7.07	0.155		0.72	3.17	0.33
Andean Southern Volcanic Arc Zones.csv	[21041]	11 SVZ	La Barda	Caburgua	82	24	SC Chile	ANDEAN ARC / SOUTHERN ANDEAN VOLCANIC ZONE / CHILE / LA BARDA		-39.22	-39.22	-71.79	-71.79	SAE			s_LEM-21 [21041]	BASALT [21041]	Holocene									VOL					WR [21041]	50.23	1.089		17.49				9.19	9.39	7.17	0.157		0.68	3.23	0.34
Andean Southern Volcanic Arc Zones.csv	[21041]	11 SVZ	La Barda	Caburgua	82	24	SC Chile	ANDEAN ARC / SOUTHERN ANDEAN VOLCANIC ZONE / CHILE / LA BARDA		-39.22	-39.22	-71.79	-71.79	SAE			s_LEM-21A [21041]	BASALT [21041]	Holocene									VOL					WR [21041]	50.1	1.059		17.4				8.78	9.33	7.26	0.154		0.68	3.2	0.32
Andean Southern Volcanic Arc Zones.csv	[21041]	11 SVZ	La Barda	Caburgua	82	24	SC Chile	ANDEAN ARC / SOUTHERN ANDEAN VOLCANIC ZONE / CHILE / LA BARDA		-39.22	-39.22	-71.79	-71.79	SAE			s_LEM-22 [21041]	BASALT [21041]	Holocene									VOL					WR [21041]	50.1	1.108		17.93				9.29	9.38	6.96	0.157		0.69	3.15	0.35
Andean Southern Volcanic Arc Zones.csv	[21041]	11 SVZ	La Barda	Caburgua	82	24	SC Chile	ANDEAN ARC / SOUTHERN ANDEAN VOLCANIC ZONE / CHILE / LA BARDA		-39.22	-39.22	-71.79	-71.79	SAE			s_LEM-23 [21041]	BASALT [21041]	Holocene									VOL					WR [21041]	51	1.109		17.49				9.07	9.39	7.24	0.157		0.74	3.31	0.34
Andean Southern Volcanic Arc Zones.csv	[21041]	11 SVZ	La Barda	Caburgua	82	24	SC Chile	ANDEAN ARC / SOUTHERN ANDEAN VOLCANIC ZONE / CHILE / LA BARDA		-39.22	-39.22	-71.79	-71.79	SAE			s_LEM-24 [21041]	BASALT [21041]	Holocene									VOL					WR [21041]	51	1.109		17.76				8.81	9.31	6.94	0.157		0.73	3.29	0.32
Andean Southern Volcanic Arc Zones.csv	[21041]	11 SVZ	La Barda	Caburgua	82	24	SC Chile	ANDEAN ARC / SOUTHERN ANDEAN VOLCANIC ZONE / CHILE / LA BARDA		-39.22	-39.22	-71.79	-71.79	SAE			s_LEM-25 [21041]	BASALT [21041]	Holocene									VOL					WR [21041]	50.07	1.106		17.88				8.98	9.23	7.14	0.157		0.77	3.27	0.32
Andean Southern Volcanic Arc Zones.csv	[21041]	11 SVZ	La Barda	Caburgua	82	24	SC Chile	ANDEAN ARC / SOUTHERN ANDEAN VOLCANIC ZONE / CHILE / LA BARDA		-39.22	-39.22	-71.79	-71.79	SAE			s_LEM-LB-1 [21041]	BASALT [21041]	Holocene									VOL					WR [21041]	51.25	1.082		17.16				8.32	9.37	6.31	0.178		0.66	3.04	0.3
Andean Southern Volcanic Arc Zones.csv	[21041]	11 SVZ	La Barda	Caburgua	82	24	SC Chile	ANDEAN ARC / SOUTHERN ANDEAN VOLCANIC ZONE / CHILE / LA BARDA		-39.22	-39.22	-71.79	-71.79	SAE			s_BARDA1-1 [21041]	BASALT [21041]	Holocene									VOL					WR [21041]	50.07	1.069		16.71				9.31	9.05	7.64	0.154		0.73	3.13	0.32
Andean Southern Volcanic Arc Zones.csv	[21041]	11 SVZ	La Barda	Caburgua	82	24	SC Chile	ANDEAN ARC / SOUTHERN ANDEAN VOLCANIC ZONE / CHILE / LA BARDA		-39.22	-39.22	-71.79	-71.79	SAE			s_BARDA1-2 [21041]	BASALT [21041]	Holocene									VOL					WR [21041]	50.45	1.077		16.82				8.99	9.07	7.59	0.154		0.74	3.13	0.33
Andean Southern Volcanic Arc Zones.csv	[21041]	11 SVZ	La Barda	Caburgua	82	24	SC Chile	ANDEAN ARC / SOUTHERN ANDEAN VOLCANIC ZONE / CHILE / LA BARDA		-39.22	-39.22	-71.79	-71.79	SAE			s_BARDA2-3 [21041]	BASALT [21041]	Holocene									VOL					WR [21041]	49.57	1.108		16.98				9.12	9.42	7.14	0.155		0.67	3.02	0.33
Andean Southern Volcanic Arc Zones.csv	[21041]	11 SVZ	La Barda	Caburgua	82	24	SC Chile	ANDEAN ARC / SOUTHERN ANDEAN VOLCANIC ZONE / CHILE / LA BARDA		-39.22	-39.22	-71.79	-71.79	SAE			s_BARDA2-4 [21041]	BASALT [21041]	Holocene									VOL					WR [21041]	50.43	1.089		16.98				9.16	9.53	7.11	0.155		0.7	3.12	0.33
Andean Southern Volcanic Arc Zones.csv	[20346]	11 SVZ	La Barda	Caburgua	82	24	SC Chile	ANDEAN ARC / SOUTHERN ANDEAN VOLCANIC ZONE / CHILE / LA BARDA		-39.2	-39.2	-71.8	-71.8	SAE			s_150194-6 [20346]	BASALT [20346]	Pleistocene-active									VOL					WR [20346]	50.35	1.06		17.82				8.63	9.6	7.62	0.16		0.67	3.21	0.3
Andean Southern Volcanic Arc Zones.csv	[20346]	11 SVZ	San Jorge	Caburgua	82	24	SC Chile	ANDEAN ARC / SOUTHERN ANDEAN VOLCANIC ZONE / CHILE / SAN JORGE		-39.27	-39.27	-71.67	-71.67	SAE			s_140194-2 [20346]	BASALT [20346]	Pleistocene-active									VOL					WR [20346]	50.77	0.77		16.02				8.61	9.64	10.3	0.16		0.41	2.55	0.11
Andean Southern Volcanic Arc Zones.csv	[20346]	11 SVZ	San Jorge	Caburgua	82	24	SC Chile	ANDEAN ARC / SOUTHERN ANDEAN VOLCANIC ZONE / CHILE / SAN JORGE		-39.27	-39.27	-71.67	-71.67	SAE			s_140194-4 [20346]	BASALT [20346]	Pleistocene-active									VOL					WR [20346]	50.39	0.8		16.23				8.5	9.72	9.25	0.16		0.42	2.63	0.13
Andean Southern Volcanic Arc Zones.csv	[20346]	11 SVZ	San Jorge	Caburgua	82	24	SC Chile	ANDEAN ARC / SOUTHERN ANDEAN VOLCANIC ZONE / CHILE / SAN JORGE		-39.27	-39.27	-71.67	-71.67	SAE			s_140194-5A [20346]	BASALT [20346]	Pleistocene-active									VOL					WR [20346]	50.63	0.77		16.16				8.69	10.02	9.19	0.16		0.42	1.95	0.1
Andean Southern Volcanic Arc Zones.csv	[20346]	11 SVZ	San Jorge	Caburgua	82	24	SC Chile	ANDEAN ARC / SOUTHERN ANDEAN VOLCANIC ZONE / CHILE / SAN JORGE		-39.27	-39.27	-71.67	-71.67	SAE			s_140194-5B [20346]	BASALT [20346]	Pleistocene-active									VOL					WR [20346]	50.7	0.77		16.19				8.71	10.02	9.17	0.16		0.41	1.91	0.11
Andean Southern Volcanic Arc Zones.csv	[20346]	11 SVZ	San Jorge	Caburgua	82	24	SC Chile	ANDEAN ARC / SOUTHERN ANDEAN VOLCANIC ZONE / CHILE / SAN JORGE		-39.27	-39.27	-71.67	-71.67	SAE			s_140194-7A [20346]	BASALT [20346]	Pleistocene-active									VOL					WR [20346]	50.74	0.78		16.2				8.55	9.73	9.83	0.16		0.4	2.53	0.12
Andean Southern Volcanic Arc Zones.csv	[20346]	11 SVZ	San Jorge	Caburgua	82	24	SC Chile	ANDEAN ARC / SOUTHERN ANDEAN VOLCANIC ZONE / CHILE / SAN JORGE		-39.27	-39.27	-71.67	-71.67	SAE			s_140194-7B [20346]	BASALT [20346]	Pleistocene-active									VOL					WR [20346]	50.95	0.77		16.07				8.72	10.06	9.28	0.16		0.45	1.93	0.1
Andean Southern Volcanic Arc Zones.csv	[20346]	11 SVZ	San Jorge	Caburgua	82	24	SC Chile	ANDEAN ARC / SOUTHERN ANDEAN VOLCANIC ZONE / CHILE / SAN JORGE		-39.27	-39.27	-71.67	-71.67	SAE			s_120194-3 [20346]	BASALT [20346]	Pleistocene-active									VOL					WR [20346]	50.77	0.77		15.93				8.57	9.65	10.36	0.16		0.42	2.49	0.12
Andean Southern Volcanic Arc Zones.csv	[20346]	11 SVZ	San Jorge	Caburgua	82	24	SC Chile	ANDEAN ARC / SOUTHERN ANDEAN VOLCANIC ZONE / CHILE / SAN JORGE		-39.27	-39.27	-71.67	-71.67	SAE			s_SJ SC 1104 A [20346]	BASALT [20346]	Pleistocene-active									VOL					WR [20346]	49.37	0.76		14.58				8.91	8.63	13.91	0.18		0.29	2.15	0.23
Andean Southern Volcanic Arc Zones.csv	[20346]	11 SVZ	San Jorge	Caburgua	82	24	SC Chile	ANDEAN ARC / SOUTHERN ANDEAN VOLCANIC ZONE / CHILE / SAN JORGE		-39.27	-39.27	-71.67	-71.67	SAE			s_SJ SC 1104 B [20346]	BASALT [20346]	Pleistocene-active									VOL					WR [20346]	48.84	0.77		14.73				9.2	8.46	14.2	0.19		0.28	2.1	0.22
Andean Southern Volcanic Arc Zones.csv	[20346]	11 SVZ	San Jorge	Caburgua	82	24	SC Chile	ANDEAN ARC / SOUTHERN ANDEAN VOLCANIC ZONE / CHILE / SAN JORGE		-39.27	-39.27	-71.67	-71.67	SAE			s_SJ SC 1104 C [20346]	BASALT [20346]	Pleistocene-active									VOL					WR [20346]	51.26	0.82		15.65				8.65	9.37	10.09	0.17		0.35	2.47	0.2
Andean Southern Volcanic Arc Zones.csv	[20346]	11 SVZ	San Jorge	Caburgua	82	24	SC Chile	ANDEAN ARC / SOUTHERN ANDEAN VOLCANIC ZONE / CHILE / SAN JORGE		-39.27	-39.27	-71.67	-71.67	SAE			s_SJ SC 1104 E [20346]	BASALT [20346]	Pleistocene-active									VOL					WR [20346]	49.57	0.72		13.71				8.95	8.26	14.98	0.18		0.29	2.12	0.21
Andean Southern Volcanic Arc Zones.csv	[20346]	11 SVZ	San Jorge	Caburgua	82	24	SC Chile	ANDEAN ARC / SOUTHERN ANDEAN VOLCANIC ZONE / CHILE / SAN JORGE		-39.27	-39.27	-71.67	-71.67	SAE			s_SJ SC 1104 H [20346]	BASALT [20346]	Pleistocene-active									VOL					WR [20346]	50.92	0.81		15.35				8.4	9.41	10.95	0.17		0.37	2.49	0.2
Andean Southern Volcanic Arc Zones.csv	[21041]	11 SVZ	San Jorge	Caburgua	82	24	SC Chile	ANDEAN ARC / SOUTHERN ANDEAN VOLCANIC ZONE / CHILE / SAN JORGE		-39.34	-39.34	-71.66	-71.66	SAE			s_SJ-T-1 [21041]	BASALT [21041]	Holocene									VOL					WR [21041]	51.56	0.734		14.82				8.71	9.92	11.28	0.165		0.37	2.4	0.14
Andean Southern Volcanic Arc Zones.csv	[21041]	11 SVZ	San Jorge	Caburgua	82	24	SC Chile	ANDEAN ARC / SOUTHERN ANDEAN VOLCANIC ZONE / CHILE / SAN JORGE		-39.34	-39.34	-71.66	-71.66	SAE			s_SJ-T-2 [21041]	BASALT [21041]	Holocene									VOL					WR [21041]	51.12	0.704		14.46				9.02	9.86	11.48	0.167		0.35	2.33	0.12
Andean Southern Volcanic Arc Zones.csv	[21041]	11 SVZ	San Jorge	Caburgua	82	24	SC Chile	ANDEAN ARC / SOUTHERN ANDEAN VOLCANIC ZONE / CHILE / SAN JORGE		-39.34	-39.34	-71.66	-71.66	SAE			s_SJ-T-3 [21041]	BASALT [21041]	Holocene									VOL					WR [21041]	51.65	0.722		14.81				8.69	10.1	11.09	0.165		0.36	2.38	0.13
Andean Southern Volcanic Arc Zones.csv	[21041]	11 SVZ	San Jorge	Caburgua	82	24	SC Chile	ANDEAN ARC / SOUTHERN ANDEAN VOLCANIC ZONE / CHILE / SAN JORGE		-39.34	-39.34	-71.66	-71.66	SAE			s_SJ-T-3A [21041]	BASALT [21041]	Holocene									VOL					WR [21041]	51.65	0.721		14.7				8.71	9.96	11.17	0.164		0.36	2.37	0.13
Andean Southern Volcanic Arc Zones.csv	[21041]	11 SVZ	San Jorge	Caburgua	82	24	SC Chile	ANDEAN ARC / SOUTHERN ANDEAN VOLCANIC ZONE / CHILE / SAN JORGE		-39.34	-39.34	-71.66	-71.66	SAE			s_SJ-T-4A [21041]	BASALT [21041]	Holocene									VOL					WR [21041]	51.53	0.717		14.94				8.78	9.98	11.18	0.164		0.36	2.37	0.11
Andean Southern Volcanic Arc Zones.csv	[21041]	11 SVZ	San Jorge	Caburgua	82	24	SC Chile	ANDEAN ARC / SOUTHERN ANDEAN VOLCANIC ZONE / CHILE / SAN JORGE		-39.34	-39.34	-71.66	-71.66	SAE			s_SJ-T-5 [21041]	BASALT [21041]	Holocene									VOL					WR [21041]	51.53	0.735		14.72				8.63	9.86	11.19	0.16		0.38	2.46	0.12
Andean Southern Volcanic Arc Zones.csv	[21041]	11 SVZ	San Jorge	Caburgua	82	24	SC Chile	ANDEAN ARC / SOUTHERN ANDEAN VOLCANIC ZONE / CHILE / SAN JORGE		-39.34	-39.34	-71.66	-71.66	SAE			s_SJ-T-CL [21041]	BASALT [21041]	Holocene									VOL					WR [21041]	50.13	0.733		14.63				9.9	10	10.87	0.174		0.39	2.34	0.09
Andean Southern Volcanic Arc Zones.csv	[21041]	11 SVZ	San Jorge	Caburgua	82	24	SC Chile	ANDEAN ARC / SOUTHERN ANDEAN VOLCANIC ZONE / CHILE / SAN JORGE		-39.34	-39.34	-71.66	-71.66	SAE			s_SJ-T-5A [21041]	BASALT [21041]	Holocene									VOL					WR [21041]	51.04	0.748		15.48				8.75	9.81	11.06	0.165		0.39	2.43	0.14
Andean Southern Volcanic Arc Zones.csv	[21041]	11 SVZ	San Jorge	Caburgua	82	24	SC Chile	ANDEAN ARC / SOUTHERN ANDEAN VOLCANIC ZONE / CHILE / SAN JORGE		-39.34	-39.34	-71.66	-71.66	SAE			s_SJ-T-6 [21041]	BASALT [21041]	Holocene									VOL					WR [21041]	50.63	0.741		15.28				8.52	9.76	10.82	0.166		0.39	2.42	0.13
Andean Southern Volcanic Arc Zones.csv	[21041]	11 SVZ	San Jorge	Caburgua	82	24	SC Chile	ANDEAN ARC / SOUTHERN ANDEAN VOLCANIC ZONE / CHILE / SAN JORGE		-39.34	-39.34	-71.66	-71.66	SAE			s_SJ-T-7 [21041]	BASALT [21041]	Holocene									VOL					WR [21041]	51.31	0.775		15.8				8.61	9.87	10.39	0.159		0.4	2.52	0.13
Andean Southern Volcanic Arc Zones.csv	[21041]	11 SVZ	San Jorge	Caburgua	82	24	SC Chile	ANDEAN ARC / SOUTHERN ANDEAN VOLCANIC ZONE / CHILE / SAN JORGE		-39.34	-39.34	-71.66	-71.66	SAE			s_SJ-T-8 [21041]	BASALT [21041]	Holocene									VOL					WR [21041]	51.45	0.79		16.06				8.66	9.81	10.19	0.159		0.42	2.55	0.14
Andean Southern Volcanic Arc Zones.csv	[21041]	11 SVZ	San Jorge	Caburgua	82	24	SC Chile	ANDEAN ARC / SOUTHERN ANDEAN VOLCANIC ZONE / CHILE / SAN JORGE		-39.34	-39.34	-71.66	-71.66	SAE			s_SJ-B-2A [21041]	BASALT [21041]	Holocene									VOL					WR [21041]	50.26	0.518		13.63				9.25	8.98	11.76	0.158		0.36	2.31	0.1
Andean Southern Volcanic Arc Zones.csv	[21041]	11 SVZ	San Jorge	Caburgua	82	24	SC Chile	ANDEAN ARC / SOUTHERN ANDEAN VOLCANIC ZONE / CHILE / SAN JORGE		-39.34	-39.34	-71.66	-71.66	SAE			s_SJ-B-2B [21041]	BASALT [21041]	Holocene									VOL					WR [21041]	49.81	0.753		15.15				9.43	10.02	10.89	0.164		0.37	2.27	0.09
Andean Southern Volcanic Arc Zones.csv	[21041]	11 SVZ	San Jorge	Caburgua	82	24	SC Chile	ANDEAN ARC / SOUTHERN ANDEAN VOLCANIC ZONE / CHILE / SAN JORGE		-39.34	-39.34	-71.66	-71.66	SAE			s_SJ-B-2C [21041]	BASALT [21041]	Holocene									VOL					WR [21041]	50.58	0.697		14.45				8.83	10.17	10.66	0.162		0.39	2.36	0.09
Andean Southern Volcanic Arc Zones.csv	[21041]	11 SVZ	San Jorge	Caburgua	82	24	SC Chile	ANDEAN ARC / SOUTHERN ANDEAN VOLCANIC ZONE / CHILE / SAN JORGE		-39.34	-39.34	-71.66	-71.66	SAE			s_SJ-L-1 [21041]	BASALT [21041]	Holocene									VOL					WR [21041]	50.8	0.575		14.24				9.5	8.97	11.45	0.161		0.41	2.48	0.13
Andean Southern Volcanic Arc Zones.csv	[21041]	11 SVZ	San Jorge	Caburgua	82	24	SC Chile	ANDEAN ARC / SOUTHERN ANDEAN VOLCANIC ZONE / CHILE / SAN JORGE		-39.34	-39.34	-71.66	-71.66	SAE			s_SJ-L-2 [21041]	BASALT [21041]	Holocene									VOL					WR [21041]	50.54	0.561		14.37				9.44	8.99	10.93	0.156		0.39	2.48	0.13
Andean Southern Volcanic Arc Zones.csv	[21041]	11 SVZ	San Jorge	Caburgua	82	24	SC Chile	ANDEAN ARC / SOUTHERN ANDEAN VOLCANIC ZONE / CHILE / SAN JORGE		-39.34	-39.34	-71.66	-71.66	SAE			s_SJ-L-3 [21041]	BASALT [21041]	Holocene									VOL					WR [21041]	51.61	0.572		14.45				9.22	9.26	10.55	0.156		0.42	2.6	0.14
Andean Southern Volcanic Arc Zones.csv	[21041]	11 SVZ	San Jorge	Caburgua	82	24	SC Chile	ANDEAN ARC / SOUTHERN ANDEAN VOLCANIC ZONE / CHILE / SAN JORGE		-39.34	-39.34	-71.66	-71.66	SAE			s_SJ-L-4 [21041]	ANDESITE, BASALTIC [21041]	Holocene									VOL					WR [21041]	52.11	0.561		14.18				9.05	9.28	10.29	0.155		0.42	2.56	0.14
Andean Southern Volcanic Arc Zones.csv	[21041]	11 SVZ	San Jorge	Caburgua	82	24	SC Chile	ANDEAN ARC / SOUTHERN ANDEAN VOLCANIC ZONE / CHILE / SAN JORGE		-39.34	-39.34	-71.66	-71.66	SAE			s_SJ-L-5 [21041]	BASALT [21041]	Holocene									VOL					WR [21041]	51.4	0.554		14.08				9.12	9.2	10.83	0.156		0.41	2.56	0.13
Andean Southern Volcanic Arc Zones.csv	[21041]	11 SVZ	San Jorge	Caburgua	82	24	SC Chile	ANDEAN ARC / SOUTHERN ANDEAN VOLCANIC ZONE / CHILE / SAN JORGE		-39.34	-39.34	-71.66	-71.66	SAE			s_SJ-L-6 [21041]	BASALT [21041]	Holocene									VOL					WR [21041]	51.54	0.573		14.45				9.04	9.36	9.94	0.156		0.42	2.64	0.16
Andean Southern Volcanic Arc Zones.csv	[20346]	11 SVZ	San Jorge	Caburgua	82	24	SC Chile	ANDEAN ARC / SOUTHERN ANDEAN VOLCANIC ZONE / CHILE / SAN JORGE		-39.27	-39.27	-71.67	-71.67	SAE			s_140194-1 [20346]	BASALT [20346]	Pleistocene-active									VOL					WR [20346]	50.39	0.75		15.7				8.51	10	10.4	0.16		0.42	2.54	0.12
Andean Southern Volcanic Arc Zones.csv	[19914]	11 SVZ	Villarrica	Villarrica	83	24	SC Chile	ANDEAN ARC / SOUTHERN ANDEAN VOLCANIC ZONE / CHILE / VILLARRICA (RUCAPILLAN) / 1971 VILLARRICA LAVA FLOW	1971 VILLARRICA LAVA	-39.43	-39.47	-71.95	-72.05	SAE			s_1971 N6 [19914]	ANDESITE, BASALTIC [19914]	year 1971									VOL					WR [19914]	52.85	1.105		16.76		7.2	3.05		9.76	6.39	0.157		0.64	3.06	0.21
Andean Southern Volcanic Arc Zones.csv	[19914]	11 SVZ	Villarrica	Villarrica	83	24	SC Chile	ANDEAN ARC / SOUTHERN ANDEAN VOLCANIC ZONE / CHILE / VILLARRICA (RUCAPILLAN) / 1971 VILLARRICA LAVA FLOW	1971 VILLARRICA LAVA	-39.43	-39.47	-71.95	-72.05	SAE			s_1971 09 [19914]	ANDESITE, BASALTIC [19914]	year 1972									VOL					WR [19914]	52.47	1.113		16.71		6.7	3.31		9.61	6.1	0.154		0.65	3.06	0.23
Andean Southern Volcanic Arc Zones.csv	[19914]	11 SVZ	Villarrica	Villarrica	83	24	SC Chile	ANDEAN ARC / SOUTHERN ANDEAN VOLCANIC ZONE / CHILE / VILLARRICA (RUCAPILLAN) / 1971 VILLARRICA LAVA FLOW	1971 VILLARRICA LAVA	-39.43	-39.47	-71.95	-72.05	SAE			s_1971 30 [19914]	ANDESITE, BASALTIC [19914]	year 1973									VOL					WR [19914]	52.93	1.132		16.77		7.1	2.83		9.63	6.02	0.154		0.65	3.08	0.18
Andean Southern Volcanic Arc Zones.csv	[19914]	11 SVZ	Villarrica	Villarrica	83	24	SC Chile	ANDEAN ARC / SOUTHERN ANDEAN VOLCANIC ZONE / CHILE / VILLARRICA (RUCAPILLAN) / 1971 VILLARRICA LAVA FLOW	1971 VILLARRICA LAVA	-39.43	-39.47	-71.95	-72.05	SAE			s_R1971 DV [19914]	ANDESITE, BASALTIC [19914]	year 1974									VOL					WR [19914]	51.76	1.13		16.59		5.5	4.55		9.55	6.1	0.154		0.63	2.98	0.2
Andean Southern Volcanic Arc Zones.csv	[19904]	11 SVZ	Villarrica	Villarrica	83	24	SC Chile	ANDEAN ARC / SOUTHERN ANDEAN VOLCANIC ZONE / CHILE / VILLARRICA (RUCAPILLAN)	CHAIMILLA ERUPTION	-39.42	-39.42	-71.93	-71.93	SAE			s_VL05B [19904]	BASALT [19904]	Pleistocene-active									VOL					WR [19904]	51.16	0.95		18.66				8.41	9.76	6.43	0.15		0.58	2.79	0.16
Andean Southern Volcanic Arc Zones.csv	[3831]	11 SVZ	Villarrica	Villarrica	83	24	SC Chile	ANDEAN ARC / SOUTHERN ANDEAN VOLCANIC ZONE / CHILE / VILLARRICA (RUCAPILLAN) / VILLARRICA I		-39.42	-39.42	-71.95	-71.95	SAE			s_V1-3 [3831]	ANDESITE, BASALTIC [3831]	Pleistocene-active									VOL					WR [3831]	52.49	1.23		16.55		10.25			9	6.4	0.16		0.71	3.08	0.24
Andean Southern Volcanic Arc Zones.csv	[3831]	11 SVZ	Villarrica	Villarrica	83	24	SC Chile	ANDEAN ARC / SOUTHERN ANDEAN VOLCANIC ZONE / CHILE / VILLARRICA (RUCAPILLAN) / VILLARRICA II		-39.42	-39.42	-71.95	-71.95	SAE			s_V2-8 [3831]	BASALT [3831]	Pleistocene-active									VOL					WR [3831]	51.47	0.86		17.58		9.12			10.84	7.04	0.15		0.43	2.67	0.13
Andean Southern Volcanic Arc Zones.csv	[3831]	11 SVZ	Villarrica	Villarrica	83	24	SC Chile	ANDEAN ARC / SOUTHERN ANDEAN VOLCANIC ZONE / CHILE / VILLARRICA (RUCAPILLAN) / VILLARRICA III		-39.42	-39.42	-71.95	-71.95	SAE			s_V3-5 [3831]	ANDESITE, BASALTIC [3831]	Pleistocene-active							1971		VOL					WR [3831]	52.19	1.14		16.82		9.73			9.61	6.12	0.16		0.63	3.18	0.24
Andean Southern Volcanic Arc Zones.csv	[3831]	11 SVZ	Villarrica	Villarrica	83	24	SC Chile	ANDEAN ARC / SOUTHERN ANDEAN VOLCANIC ZONE / CHILE / VILLARRICA (RUCAPILLAN) / VILLARRICA III		-39.42	-39.42	-71.95	-71.95	SAE			s_V3-6 [3831]	ANDESITE, BASALTIC [3831]	Pleistocene-active							1971		VOL					WR [3831]	52.37	1.15		16.85		9.76			9.58	6.11	0.16		0.65	3.21	0.22
Andean Southern Volcanic Arc Zones.csv	[3831]	11 SVZ	Villarrica	Villarrica	83	24	SC Chile	ANDEAN ARC / SOUTHERN ANDEAN VOLCANIC ZONE / CHILE / VILLARRICA (RUCAPILLAN) / VILLARRICA III		-39.42	-39.42	-71.95	-71.95	SAE			s_V3-7 [3831]	ANDESITE, BASALTIC [3831]	Pleistocene-active							1971		VOL					WR [3831]	52.6	1.15		16.79		9.76			9.62	6.05	0.16		0.65	3.12	0.22
Andean Southern Volcanic Arc Zones.csv	[3831][3996]	11 SVZ	Villarrica	Villarrica	83	24	SC Chile	ANDEAN ARC / SOUTHERN ANDEAN VOLCANIC ZONE / CHILE / VILLARRICA (RUCAPILLAN) / VILLARRICA II		-39.42	-39.42	-71.95	-71.95	SAE			s_V2-2 [3831]	BASALT [3831]	Quaternary				QUATERNARY [3996]					VOL					WR [3831]	51.79	1.14		16.89		10.03			9.77	6.63	0.16		0.61	2.91	0.21
Andean Southern Volcanic Arc Zones.csv	[3831][3996]	11 SVZ	Villarrica	Villarrica	83	24	SC Chile	ANDEAN ARC / SOUTHERN ANDEAN VOLCANIC ZONE / CHILE / VILLARRICA (RUCAPILLAN) / VILLARRICA II		-39.42	-39.42	-71.95	-71.95	SAE			s_V2-4 [3831]	BASALT [3831]	Quaternary				QUATERNARY [3996]					VOL					WR [3831]	51.97	0.98		16.9		9.51			9.81	7.4	0.16		0.58	2.92	0.19
Andean Southern Volcanic Arc Zones.csv	[18780]	11 SVZ	Villarrica	Villarrica	83	24	SC Chile	ANDEAN ARC / SOUTHERN ANDEAN VOLCANIC ZONE / CHILE / VILLARRICA (RUCAPILLAN)		-39.396	-39.396	-71.952	-71.952	SAE			s_CL170 [18780]	NOT GIVEN [18780]	Holocene				HOLOCENE [18780]					VOL					WR [18780]	51.438	1.17835		15.8778				9.75	9.36689	7.3597	0.159776		0.639105	2.91592	0.229678
Andean Southern Volcanic Arc Zones.csv	[18365]	11 SVZ	Villarrica	Villarrica	83	24	SC Chile	ANDEAN ARC / SOUTHERN ANDEAN VOLCANIC ZONE / CHILE / VILLARRICA (RUCAPILLAN)		-39.39	-39.39	-71.95	-71.95	SAE			s_CL 166 [18365]	BASALT [18365]	Holocene				HOLOCENE [18365]					VOL			F		WR [18365]	51.38	0.89		18.64				8.73	10.21	6.27	0.13		0.62	3.06	0.16
Andean Southern Volcanic Arc Zones.csv	[18365]	11 SVZ	Villarrica	Villarrica	83	24	SC Chile	ANDEAN ARC / SOUTHERN ANDEAN VOLCANIC ZONE / CHILE / VILLARRICA (RUCAPILLAN)		-39.4	-39.4	-71.95	-71.95	SAE			s_CL 170(B) [18365]	BASALT [18365]	Holocene				HOLOCENE [18365]					VOL			F		WR [18365]	51.44	1.18		15.9				10.83	9.37	7.36	0.16		0.64	2.92	0.23
Andean Southern Volcanic Arc Zones.csv	[3831]	11 SVZ	Huililco	Huililco	84	24	SC Chile	ANDEAN ARC / SOUTHERN ANDEAN VOLCANIC ZONE / CHILE / HUILILCO		-39.43	-39.43	-71.62	-71.62	SAE			s_HL-1 [3831]	BASALT [3831]	Pleistocene-active									VOL					WR [3831]	51.48	1.16		17.75		9			9.18	6.24	0.16		1.13	3.27	0.38
Andean Southern Volcanic Arc Zones.csv	[3831]	11 SVZ	Huililco	Huililco	84	24	SC Chile	ANDEAN ARC / SOUTHERN ANDEAN VOLCANIC ZONE / CHILE / HUILILCO		-39.43	-39.43	-71.62	-71.62	SAE			s_HL-2 [3831]	BASALT [3831]	Pleistocene-active									VOL					WR [3831]	51.93	1.08		17.57		9.03			9.21	6.56	0.16		1.08	3.03	0.34
Andean Southern Volcanic Arc Zones.csv	[21041]	11 SVZ	Huililco	Huililco	84	24	SC Chile	ANDEAN ARC / SOUTHERN ANDEAN VOLCANIC ZONE / CHILE / HUILILCO		-39.43	-39.43	-71.62	-71.62	SAE			s_LEM-8 [21041]	ANDESITE, BASALTIC [21041]	Holocene									VOL					WR [21041]	52.51	0.925		16.65				8.45	8.81	6.38	0.148		1.08	3.19	0.34
Andean Southern Volcanic Arc Zones.csv	[21041]	11 SVZ	Huililco	Huililco	84	24	SC Chile	ANDEAN ARC / SOUTHERN ANDEAN VOLCANIC ZONE / CHILE / HUILILCO		-39.43	-39.43	-71.62	-71.62	SAE			s_LEM-8A [21041]	ANDESITE, BASALTIC [21041]	Holocene									VOL					WR [21041]	52.3	1.083		17.66				8.58	9.16	6.24	0.153		1.08	3.22	0.34
Andean Southern Volcanic Arc Zones.csv	[21041]	11 SVZ	Huililco	Huililco	84	24	SC Chile	ANDEAN ARC / SOUTHERN ANDEAN VOLCANIC ZONE / CHILE / HUILILCO		-39.43	-39.43	-71.62	-71.62	SAE			s_LEM-9 [21041]	BASALT [21041]	Holocene									VOL					WR [21041]	51.96	1.051		17.73				8.56	9.15	6.41	0.153		1.06	3.19	0.33
Andean Southern Volcanic Arc Zones.csv	[21041]	11 SVZ	Huililco	Huililco	84	24	SC Chile	ANDEAN ARC / SOUTHERN ANDEAN VOLCANIC ZONE / CHILE / HUILILCO		-39.43	-39.43	-71.62	-71.62	SAE			s_LEM-10 [21041]	BASALT [21041]	Holocene									VOL					WR [21041]	52	1.084		17.72				8.56	9.15	6.3	0.152		1.1	3.26	0.33
Andean Southern Volcanic Arc Zones.csv	[21041]	11 SVZ	Huililco	Huililco	84	24	SC Chile	ANDEAN ARC / SOUTHERN ANDEAN VOLCANIC ZONE / CHILE / HUILILCO		-39.43	-39.43	-71.62	-71.62	SAE			s_PVM-04 [21041]	ANDESITE, BASALTIC [21041]	Holocene									VOL					WR [21041]	52.62	1.08		16.76				8	8.69	6.28	0.15		1.1	3.1	0.33
Andean Southern Volcanic Arc Zones.csv	[21041]	11 SVZ	Huililco	Huililco	84	24	SC Chile	ANDEAN ARC / SOUTHERN ANDEAN VOLCANIC ZONE / CHILE / HUILILCO		-39.43	-39.43	-71.62	-71.62	SAE			s_PVM-05 [21041]	ANDESITE, BASALTIC [21041]	Holocene									VOL					WR [21041]	52.67	1.098		16.57				8.04	8.69	6.11	0.148		1.12	3.05	0.34
Andean Southern Volcanic Arc Zones.csv	[21041]	11 SVZ	Huililco	Huililco	84	24	SC Chile	ANDEAN ARC / SOUTHERN ANDEAN VOLCANIC ZONE / CHILE / HUILILCO		-39.43	-39.43	-71.62	-71.62	SAE			s_PVM-06 [21041]	ANDESITE, BASALTIC [21041]	Holocene									VOL					WR [21041]	52.52	1.096		16.54				8.25	8.71	6.22	0.15		1.12	3.06	0.34
Andean Southern Volcanic Arc Zones.csv	[21041]	11 SVZ	Huililco	Huililco	84	24	SC Chile	ANDEAN ARC / SOUTHERN ANDEAN VOLCANIC ZONE / CHILE / HUILILCO		-39.43	-39.43	-71.62	-71.62	SAE			s_PVM-11 [21041]	BASALT [21041]	Holocene									VOL					WR [21041]	51.6	0.974		16.33				8	9.04	8.03	0.151		0.88	2.75	0.27
Andean Southern Volcanic Arc Zones.csv	[21041]	11 SVZ	Huililco	Huililco	84	24	SC Chile	ANDEAN ARC / SOUTHERN ANDEAN VOLCANIC ZONE / CHILE / HUILILCO		-39.43	-39.43	-71.62	-71.62	SAE			s_PVM-13 [21041]	ANDESITE, BASALTIC [21041]	Holocene									VOL					WR [21041]	53.69	1.12		16.27				7.87	8.81	6.04	0.146		1.15	3.14	0.35
Andean Southern Volcanic Arc Zones.csv	[21041]	11 SVZ	Huililco	Huililco	84	24	SC Chile	ANDEAN ARC / SOUTHERN ANDEAN VOLCANIC ZONE / CHILE / HUILILCO		-39.43	-39.43	-71.62	-71.62	SAE			s_PVM-14 [21041]	ANDESITE, BASALTIC [21041]	Holocene									VOL					WR [21041]	53.49	1.134		16.12				8.04	8.86	6.03	0.147		1.14	3.07	0.35
Andean Southern Volcanic Arc Zones.csv	[21041]	11 SVZ	Huililco	Huililco	84	24	SC Chile	ANDEAN ARC / SOUTHERN ANDEAN VOLCANIC ZONE / CHILE / HUILILCO		-39.43	-39.43	-71.62	-71.62	SAE			s_PVM-15A [21041]	ANDESITE, BASALTIC [21041]	Holocene									VOL					WR [21041]	53.23	0.932		15.88				7.68	8.96	7.01	0.143		0.87	2.78	0.27
Andean Southern Volcanic Arc Zones.csv	[21041]	11 SVZ	Huililco	Huililco	84	24	SC Chile	ANDEAN ARC / SOUTHERN ANDEAN VOLCANIC ZONE / CHILE / HUILILCO		-39.43	-39.43	-71.62	-71.62	SAE			s_PVM-15B [21041]	ANDESITE, BASALTIC [21041]	Holocene									VOL					WR [21041]	52.87	0.945		16.13				7.83	9.02	7.27	0.146		0.89	2.79	0.29
Andean Southern Volcanic Arc Zones.csv	[21041]	11 SVZ	Huililco	Huililco	84	24	SC Chile	ANDEAN ARC / SOUTHERN ANDEAN VOLCANIC ZONE / CHILE / HUILILCO		-39.43	-39.43	-71.62	-71.62	SAE			s_PVM-16 [21041]	ANDESITE, BASALTIC [21041]	Holocene									VOL					WR [21041]	53.29	0.957		17				7.78	9.09	6.57	0.142		0.9	2.85	0.29
Andean Southern Volcanic Arc Zones.csv	[19945]	11 SVZ	Carran-Los Venados	Carran-Los Venados	85	24	SC Chile	ANDEAN ARC / SOUTHERN ANDEAN VOLCANIC ZONE / CHILE / CARRAN-LOS VENADOS VOLCANIC FIELD	MEDIALUNA	-40.3682	-40.3682	-71.9938	-71.9938	SAE			s_FB151112-1 [19945]	BASALT [19945]	Mid-to-Late Pleistocene									VOL					WR [19945]	51.4	1.05		17.31				8.95	8.66	6.83	0.17		0.88	3.17	0.34
Andean Southern Volcanic Arc Zones.csv	[19945]	11 SVZ	Carran-Los Venados	Carran-Los Venados	85	24	SC Chile	ANDEAN ARC / SOUTHERN ANDEAN VOLCANIC ZONE / CHILE / CARRAN-LOS VENADOS VOLCANIC FIELD	LOS GUINDOS	-40.283	-40.283	-72.0602	-72.0602	SAE			s_FB210314-2 [19945]	BASALT [19945]	Mid-to-Late Pleistocene									VOL					WR [19945]	49.75	1.15		16.68				9.11	8.93	7.57	0.16		1.1	2.93	0.28
Andean Southern Volcanic Arc Zones.csv	[19945]	11 SVZ	Carran-Los Venados	Carran-Los Venados	85	24	SC Chile	ANDEAN ARC / SOUTHERN ANDEAN VOLCANIC ZONE / CHILE / CARRAN-LOS VENADOS VOLCANIC FIELD	LOS GUINDOS	-40.3038	-40.3038	-72.0254	-72.0254	SAE			s_FB210314-5 [19945]	BASALT [19945]	Mid-to-Late Pleistocene									VOL					WR [19945]	50.26	1		17.46				9.24	8.87	6.63	0.17		0.75	3.03	0.22
Andean Southern Volcanic Arc Zones.csv	[19945]	11 SVZ	Carran-Los Venados	Carran-Los Venados	85	24	SC Chile	ANDEAN ARC / SOUTHERN ANDEAN VOLCANIC ZONE / CHILE / CARRAN-LOS VENADOS VOLCANIC FIELD	MEDIALUNA	-40.4044	-40.4044	-71.989	-71.989	SAE			s_FB220114-6 [19945]	BASALT [19945]	Mid-to-Late Pleistocene									VOL					WR [19945]	51.79	1.04		17.26				8.72	8.36	6.22	0.16		1.04	3.19	0.34
Andean Southern Volcanic Arc Zones.csv	[3216][3996]	11 SVZ	Puyehue	Puyehue	86	24	SC Chile	ANDEAN ARC / SOUTHERN ANDEAN VOLCANIC ZONE / CHILE / PUYEHUE		-40.59	-40.59	-72.12	-72.12	SAE			s_II-B8 [3216]	BASALT [3216]	Quaternary				QUATERNARY [3996]					VOL					WR [3216]	50.94	0.94		18.12		9.19		8.27	10.08	6.78	0.15		0.55	2.86	0.21
Andean Southern Volcanic Arc Zones.csv	[10020]	11 SVZ	Puyehue	Puyehue	86	24	SC Chile	ANDEAN ARC / SOUTHERN ANDEAN VOLCANIC ZONE / CHILE / PUYEHUE	CORDON CAULLE	-40.59	-40.59	-72.12	-72.12	SAE			s_PU 05 29 [10020]	BASALT [10020]	<70ka									VOL					WR [10020]	51.06	1.04		17.38				9.69	8.82	6.85	0.16		0.77	3.06	0.27
Andean Southern Volcanic Arc Zones.csv	[10020]	11 SVZ	Puyehue	Puyehue	86	24	SC Chile	ANDEAN ARC / SOUTHERN ANDEAN VOLCANIC ZONE / CHILE / PUYEHUE	CORDON CAULLE	-40.59	-40.59	-72.12	-72.12	SAE			s_PU 02 02I [10020]	ANDESITE, BASALTIC [10020]	<70ka									VOL					WR [10020]	52.73	0.82		16.98				9.09	9.22	7.28	0.15		0.57	2.89	0.13
Andean Southern Volcanic Arc Zones.csv	[10020]	11 SVZ	Puyehue	Puyehue	86	24	SC Chile	ANDEAN ARC / SOUTHERN ANDEAN VOLCANIC ZONE / CHILE / PUYEHUE	CORDON CAULLE, CERRO MIRADOR	-40.5	-40.5	-71	-72	SAE			s_PU 05 07 [10020]	BASALT [10020]	<70ka									VOL					WR [10020]	49.11	0.68		20.65				7.74	10.91	6.77	0.13		0.46	2.52	0.11
Andean Southern Volcanic Arc Zones.csv	[11951]	11 SVZ	Puyehue	Puyehue	86	24	SC Chile	ANDEAN ARC / SOUTHERN ANDEAN VOLCANIC ZONE / CHILE / PUYEHUE	STRATOVOLCANO	-40.5476	-40.5476	-72.0333	-72.0333	SAE		1495	s_PU-03-18 [11951]	BASALT [11951]	<314ka									VOL					WR [11951]	51.23	1		17.18				10.02	9.56	6.7	0.16		0.48	2.85	0.19
Andean Southern Volcanic Arc Zones.csv	[11951]	11 SVZ	Puyehue	Puyehue	86	24	SC Chile	ANDEAN ARC / SOUTHERN ANDEAN VOLCANIC ZONE / CHILE / PUYEHUE		-40.5917	-40.5917	-72.1048	-72.1048	SAE		2113	s_PU-05-10 [11951]	ANDESITE, BASALTIC [11951]	<314ka									VOL					WR [11951]	52.4	1.06		17.25				9.53	8.95	6.06	0.16		0.83	3.16	0.3
Andean Southern Volcanic Arc Zones.csv	[11951]	11 SVZ	Puyehue	Puyehue	86	24	SC Chile	ANDEAN ARC / SOUTHERN ANDEAN VOLCANIC ZONE / CHILE / PUYEHUE		-40.6105	-40.6105	-72.1213	-72.1213	SAE		1664	s_PU-02-02I [11951]	ANDESITE, BASALTIC [11951]	<314ka									VOL					WR [11951]	52.73	0.82		16.98				9.09	9.22	7.28	0.15		0.57	2.89	0.13
Andean Southern Volcanic Arc Zones.csv	[11951]	11 SVZ	Puyehue	Puyehue	86	24	SC Chile	ANDEAN ARC / SOUTHERN ANDEAN VOLCANIC ZONE / CHILE / PUYEHUE		-40.6031	-40.6031	-72.0876	-72.0876	SAE		1477	s_PU-05-29 [11951]	BASALT [11951]	<314ka									VOL					WR [11951]	51.06	1.04		17.38				9.69	8.82	6.85	0.16		0.77	3.06	0.27
Andean Southern Volcanic Arc Zones.csv	[11951]	11 SVZ	Puyehue	Puyehue	86	24	SC Chile	ANDEAN ARC / SOUTHERN ANDEAN VOLCANIC ZONE / CHILE / PUYEHUE		-40.5578	-40.5578	-72.1008	-72.1008	SAE		1692	s_PU-02-14 [11951]	BASALT [11951]	<314ka									VOL					WR [11951]	51.25	0.92		17.81				8.83	9.96	6.79	0.16		0.4	2.84	0.15
Andean Southern Volcanic Arc Zones.csv	[11951]	11 SVZ	Puyehue	Puyehue	86	24	SC Chile	ANDEAN ARC / SOUTHERN ANDEAN VOLCANIC ZONE / CHILE / PUYEHUE		-40.6006	-40.6006	-72.0844	-72.0844	SAE		1439	s_PU-05-27 [11951]	BASALT [11951]	<314ka									VOL					WR [11951]	51.89	0.95		17.51				9.34	9.34	6.27	0.15		0.69	3.01	0.24
Andean Southern Volcanic Arc Zones.csv	[11951]	11 SVZ	Puyehue	Puyehue	86	24	SC Chile	ANDEAN ARC / SOUTHERN ANDEAN VOLCANIC ZONE / CHILE / PUYEHUE		-40.6037	-40.6037	-72.1218	-72.1218	SAE		1946	s_PU-02-08 [11951]	ANDESITE, BASALTIC [11951]	Pleistocene-active									VOL					WR [11951]	55.77	0.76		16.01				7.92	8.15	6.03	0.14		1.1	3.21	0.18
Andean Southern Volcanic Arc Zones.csv	[3216]	11 SVZ	Puyehue	Puyehue	86	24	SC Chile	ANDEAN ARC / SOUTHERN ANDEAN VOLCANIC ZONE / CHILE / PUYEHUE		-40.59	-40.59	-72.12	-72.12	SAE			s_II-B1 [3216]	BASALT [3216]	interglacial									VOL					WR [3216]	48.39	0.7		14.64				9.7	8.55	14.32	0.17		0.31	2.19	0.13
Andean Southern Volcanic Arc Zones.csv	[3216]	11 SVZ	Puyehue	Puyehue	86	24	SC Chile	ANDEAN ARC / SOUTHERN ANDEAN VOLCANIC ZONE / CHILE / PUYEHUE		-40.59	-40.59	-72.12	-72.12	SAE			s_II-B6 [3216]	BASALT [3216]	interglacial									VOL					WR [3216]	50.9	0.9		17.88				8.29	9.95	6.92	0.17		0.56	2.85	0.19
Andean Southern Volcanic Arc Zones.csv	[3216]	11 SVZ	Puyehue	Puyehue	86	24	SC Chile	ANDEAN ARC / SOUTHERN ANDEAN VOLCANIC ZONE / CHILE / PUYEHUE		-40.59	-40.59	-72.12	-72.12	SAE			s_II-B7 [3216]	BASALT [3216]	interglacial									VOL					WR [3216]	50.91	0.65		16.49				8.12	10.36	9.52	0.13		0.49	2.46	0.11
Andean Southern Volcanic Arc Zones.csv	[3216]	11 SVZ	Puyehue	Puyehue	86	24	SC Chile	ANDEAN ARC / SOUTHERN ANDEAN VOLCANIC ZONE / CHILE / PUYEHUE		-40.59	-40.59	-72.12	-72.12	SAE			s_II-B10 [3216]	BASALT [3216]	interglacial									VOL					WR [3216]	51.22	0.66		16.57				8.04	10.34	9.4	0.15		0.49	2.38	0.12
Andean Southern Volcanic Arc Zones.csv	[3216]	11 SVZ	Puyehue	Puyehue	86	24	SC Chile	ANDEAN ARC / SOUTHERN ANDEAN VOLCANIC ZONE / CHILE / PUYEHUE		-40.59	-40.59	-72.12	-72.12	SAE			s_II-B15 [3216]	BASALT [3216]	interglacial									VOL					WR [3216]	51.83	0.89		18.29				8.27	10.03	6	0.16		0.65	3.02	0.2
Andean Southern Volcanic Arc Zones.csv	[20337]	11 SVZ	Anticallanca	Anticallanca	87	24	SC Chile	ANDEAN ARC / SOUTHERN ANDEAN VOLCANIC ZONE / CHILE / ANTILLANCA VOLCANIC GROUP	CASABLANCA VOLCANO	-40.771	-40.771	-72.153	-72.153	SAE			s_280281-3 [20337]	BASALT [20337]	Pleistocene-active									VOL					WR [20337]	50.55	0.86		18.21				8.76	9.98	6.61	0.16		0.51	2.83	0.14	0.18
Andean Southern Volcanic Arc Zones.csv	[7318]	11 SVZ	Anticallanca	Anticallanca	87	24	SC Chile	ANDEAN ARC / SOUTHERN ANDEAN VOLCANIC ZONE / CHILE / CASABLANCA		-40.75	-40.75	-72	-72	SAE			s_280281-03 [7318]	BASALT [7318]	Quaternary				QUATERNARY [7318]					VOL					WR [7318]	51.95	0.52		18.45				8.85	9.76	6.34	0.15		0.53	3.49	0.15
Andean Southern Volcanic Arc Zones.csv	[18365]	11 SVZ	Anticallanca	Anticallanca	87	24	SC Chile	ANDEAN ARC / SOUTHERN ANDEAN VOLCANIC ZONE / CHILE / CASABLANCA		-40.78	-40.78	-72.19	-72.19	SAE			s_CL 109(A) [18365]	BASALT [18365]	Holocene				HOLOCENE [18365]					VOL			F		WR [18365]	51.04	0.89		18.24				9.61	10.01	6.4	0.15		0.54	2.98	0.14
Andean Southern Volcanic Arc Zones.csv	[23134]	11 SVZ	La Picada	Osorno	88	24	SC Chile	ANDEAN ARC / SOUTHERN ANDEAN VOLCANIC ZONE / CHILE / LA PICADA		-41.0672	-41.0672	-72.4488	-72.4488	SAE			s_PIC04 [23134]	NOT GIVEN [23134]	Quaternary				QUATERNARY [23134]					VOL					WR [23134]	51.61	0.87		17.46				8.58	10.01	7.55	0.15		0.47	2.73	0.13
Andean Southern Volcanic Arc Zones.csv	[23134]	11 SVZ	La Picada	Osorno	88	24	SC Chile	ANDEAN ARC / SOUTHERN ANDEAN VOLCANIC ZONE / CHILE / LA PICADA		-41.0635	-41.0635	-72.447	-72.447	SAE			s_PIC05 [23134]	NOT GIVEN [23134]	Quaternary				QUATERNARY [23134]					VOL					WR [23134]	50.63	0.83		17.25				8.51	9.5	7.28	0.15		0.5	2.58	0.1
Andean Southern Volcanic Arc Zones.csv	[23134]	11 SVZ	La Picada	Osorno	88	24	SC Chile	ANDEAN ARC / SOUTHERN ANDEAN VOLCANIC ZONE / CHILE / LA PICADA		-41.0709	-41.0709	-72.4687	-72.4687	SAE			s_PIC30 [23134]	NOT GIVEN [23134]	Quaternary				QUATERNARY [23134]					VOL					WR [23134]	49.19	0.94		18.16				8.69	11.01	6.14	0.16		0.4	2.37	0.13
Andean Southern Volcanic Arc Zones.csv	[23134]	11 SVZ	La Picada	Osorno	88	24	SC Chile	ANDEAN ARC / SOUTHERN ANDEAN VOLCANIC ZONE / CHILE / LA PICADA		-41.0709	-41.0709	-72.4687	-72.4687	SAE			s_PIC31 [23134]	NOT GIVEN [23134]	Quaternary				QUATERNARY [23134]					VOL					WR [23134]	49.18	0.96		18.49				8.84	10.94	6.38	0.16		0.45	2.46	0.13
Andean Southern Volcanic Arc Zones.csv	[23134]	11 SVZ	La Picada	Osorno	88	24	SC Chile	ANDEAN ARC / SOUTHERN ANDEAN VOLCANIC ZONE / CHILE / LA PICADA		-41.0708	-41.0708	-72.4694	-72.4694	SAE			s_PIC43 [23134]	NOT GIVEN [23134]	Quaternary				QUATERNARY [23134]					VOL					WR [23134]	49.92	0.94		17.67				8.77	10.09	6.47	0.15		0.44	2.75	0.17
Andean Southern Volcanic Arc Zones.csv	[3631][4544]	11 SVZ	Osorno	Osorno	88	24	SC Chile	ANDEAN ARC / SOUTHERN ANDEAN VOLCANIC ZONE / CHILE / OSORNO	STRATOVOLCANO	-41.1	-41.1	-72.493	-72.493	SAE			s_2502813 [3631] / s_250281-03 [4544]	BASALT [3631]	late Pleistocene and Holocene									VOL					WR [3631]	51.43	0.99		16.96		10.29		9.26	9.99	6.48	0.17		0.5	2.77	0.15
Andean Southern Volcanic Arc Zones.csv	[4350]	11 SVZ	La Vigueria	Cayutue-La Vigueria	89	24	SC Chile	ANDEAN ARC / SOUTHERN ANDEAN VOLCANIC ZONE / CHILE / LA VIGUERIA		-41.1	-41.5	-72.15	-72.3	SAE			s_151284-4 [4350]	ANDESITE, BASALTIC [4350]	Post-Glacial				POSTGLACIAL [4350]					VOL					WR [4350]	51.54	0.83		17.58				8.04	9.86	7.47	0.15		0.67	2.8	0.19
Andean Southern Volcanic Arc Zones.csv	[4350]	11 SVZ	Reloncavi	Cayutue-La Vigueria	89	24	SC Chile	ANDEAN ARC / SOUTHERN ANDEAN VOLCANIC ZONE / CHILE / RELONCAVI		-41.1	-41.5	-72.15	-72.3	SAE			s_16185-1 [4350]	ANDESITE, BASALTIC [4350]	Post-Glacial				POSTGLACIAL [4350]					VOL					WR [4350]	51.38	0.89		16.58				8.36	9.69	8.75	0.16		0.64	2.56	0.17
Andean Southern Volcanic Arc Zones.csv	[4350]	11 SVZ	Reloncavi	Cayutue-La Vigueria	89	24	SC Chile	ANDEAN ARC / SOUTHERN ANDEAN VOLCANIC ZONE / CHILE / RELONCAVI		-41.1	-41.5	-72.15	-72.3	SAE			s_9185-3 [4350]	BASALT [4350]	Post-Glacial				POSTGLACIAL [4350]					VOL					WR [4350]	50.37	1.02		16.95				8.73	9.62	8.49	0.17		0.6	2.84	0.25
Andean Southern Volcanic Arc Zones.csv	[4350][7318]	11 SVZ	Cayutue	Cayutue-La Vigueria	89	24	SC Chile	ANDEAN ARC / SOUTHERN ANDEAN VOLCANIC ZONE / CHILE / CAYUTUE		-41.1	-41.5	-72.15	-72.3	SAE			s_201282-1 [4350]	ANDESITE, BASALTIC [4350]	Post-Glacial				POSTGLACIAL [4350] / QUATERNARY [7318]					VOL					WR [4350]	51.79	0.87		17.34				7.67	9.9	6.54	0.17		0.78	2.91	0.14
Andean Southern Volcanic Arc Zones.csv	[4350][7318]	11 SVZ	Pocoihuen	Cayutue-La Vigueria	89	24	SC Chile	ANDEAN ARC / SOUTHERN ANDEAN VOLCANIC ZONE / CHILE / POCOIHUEN		-41.5	-41.5	-72.3	-72.3	SAE			s_16185-3 [4350] / s_160185-03 [7318]	ANDESITE, BASALTIC [4350] / BASALT [7318]	Glacial			UPPER [4350]	GLACIAL [4350] / QUATERNARY [7318]					VOL					WR [4350]	51.81	0.91		16.96				8.22	9.94	7.49	0.16		0.64	2.77	0.18
Andean Southern Volcanic Arc Zones.csv	[4350]	11 SVZ	Pocoihuen	Cayutue-La Vigueria	89	24	SC Chile	ANDEAN ARC / SOUTHERN ANDEAN VOLCANIC ZONE / CHILE / POCOIHUEN		-41.5	-41.5	-72.3	-72.3	SAE			s_151284-1 [4350]	ANDESITE, BASALTIC [4350]	Glacial			UPPER [4350]	GLACIAL [4350]					VOL					WR [4350]	51.86	0.91		16.9				8.27	9.83	7.67	0.16		0.65	2.69	0.18
Andean Southern Volcanic Arc Zones.csv	[4350]	11 SVZ	Pocoihuen	Cayutue-La Vigueria	89	24	SC Chile	ANDEAN ARC / SOUTHERN ANDEAN VOLCANIC ZONE / CHILE / POCOIHUEN		-41.5	-41.5	-72.3	-72.3	SAE			s_151284-2 [4350]	ANDESITE, BASALTIC [4350]	Glacial			UPPER [4350]	GLACIAL [4350]					VOL					WR [4350]	52.65	0.94		17.47				8.28	9.35	6.88	0.16		0.68	2.88	0.2
Andean Southern Volcanic Arc Zones.csv	[4350]	11 SVZ	Rollizos	Cayutue-La Vigueria	89	24	SC Chile	ANDEAN ARC / SOUTHERN ANDEAN VOLCANIC ZONE / CHILE / ROLLIZOS		-41.1	-41.5	-72.15	-72.3	SAE			s_25784-1 [4350]	ANDESITE, BASALTIC [4350]	Glacial			UPPER [4350]	GLACIAL [4350]					VOL					WR [4350]	53.16	1.08		17.18				8.49	8.72	6.22	0.16		0.95	3.14	0.35
Andean Southern Volcanic Arc Zones.csv	[20550]	7(11) SVZ rear-arc	Huaiqueria	North Mendoza	90	25	C Chile rear-arc	ANDEAN ARC / SOUTHERN ANDEAN VOLCANIC ZONE / ARGENTINA / NORTHERN SEGMENT VOLCANIC FIELD	HUAIQUERIA GROUP, GUADAL, MENDOZA	-33.9871	-33.9871	-68.9274	-68.9274	SAE			s_127312 [20550]	BASALT, ALKALINE [20550]	Quaternary				QUATERNARY [20550]					VOL					WR [20550]	49.74	1.4		15.95				8.44	11.44	6.72	0.17		1.64	3.5	0.46
Andean Southern Volcanic Arc Zones.csv	[20550]	7(11) SVZ rear-arc	Huaiqueria	North Mendoza	90	25	C Chile rear-arc	ANDEAN ARC / SOUTHERN ANDEAN VOLCANIC ZONE / ARGENTINA / NORTHERN SEGMENT VOLCANIC FIELD	HUAIQUERIA GROUP, MENDOZA	-34.0697	-34.0697	-68.7543	-68.7543	SAE			s_127318 [20550]	BASALT, ALKALINE [20550]	Quaternary				QUATERNARY [20550]					VOL			F		WR [20550]	45.67	1.46		15.38				9.57	11.13	10.49	0.19		1.42	3.11	0.82
Andean Southern Volcanic Arc Zones.csv	[20550]	7(11) SVZ rear-arc	Huaiqueria	North Mendoza	90	25	C Chile rear-arc	ANDEAN ARC / SOUTHERN ANDEAN VOLCANIC ZONE / ARGENTINA / NORTHERN SEGMENT VOLCANIC FIELD	HUAIQUERIA GROUP, MENDOZA	-34.0772	-34.0772	-68.7434	-68.7434	SAE			s_127323 [20550]	BASALT, ALKALINE [20550]	Quaternary				QUATERNARY [20550]					VOL			F		WR [20550]	45.53	1.41		14.88				9.79	11.88	10.06	0.19		1.41	3.24	0.85
Andean Southern Volcanic Arc Zones.csv	[20550]	7(11) SVZ rear-arc	Papagayos	North Mendoza	90	25	C Chile rear-arc	ANDEAN ARC / SOUTHERN ANDEAN VOLCANIC ZONE / ARGENTINA / NORTHERN SEGMENT VOLCANIC FIELD	PAPAGAYOS GROUP, CERRO LOS LEONES, MENDOZA	-34.2503	-34.2503	-69.0282	-69.0282	SAE			s_126051 [20550]	BASALT, ALKALINE [20550]	Quaternary				QUATERNARY [20550]					VOL			F		WR [20550]	45.97	1.51		15.28				9.76	10.56	11.2	0.18		0.72	3.41	0.54
Andean Southern Volcanic Arc Zones.csv	[20550]	7(11) SVZ rear-arc	Papagayos	North Mendoza	90	25	C Chile rear-arc	ANDEAN ARC / SOUTHERN ANDEAN VOLCANIC ZONE / ARGENTINA / NORTHERN SEGMENT VOLCANIC FIELD	PAPAGAYOS GROUP, CERRO DEL MEDIO, MENDOZA	-34.2785	-34.2785	-69.0944	-69.0944	SAE			s_127311 [20550]	BASALT, ALKALINE [20550]	Quaternary				QUATERNARY [20550]					VOL			F		WR [20550]	45.27	1.38		15.29				10.05	11.54	10.87	0.18		1.07	2.98	0.49
Andean Southern Volcanic Arc Zones.csv	[20550]	7(11) SVZ rear-arc	Papagayos	North Mendoza	90	25	C Chile rear-arc	ANDEAN ARC / SOUTHERN ANDEAN VOLCANIC ZONE / ARGENTINA / NORTHERN SEGMENT VOLCANIC FIELD	PAPAGAYOS GROUP, CERRO LOS LEONES, MENDOZA	-34.2505	-34.2505	-69.0251	-69.0251	SAE			s_127424 [20550]	BASALT, ALKALINE [20550]	Quaternary				QUATERNARY [20550]					VOL			F		WR [20550]	45.93	1.56		15.81				10.17	11.21	11.01	0.18		1.42	3.15	0.57
Andean Southern Volcanic Arc Zones.csv	[20550]	7(11) SVZ rear-arc	Papagayos	North Mendoza	90	25	C Chile rear-arc	ANDEAN ARC / SOUTHERN ANDEAN VOLCANIC ZONE / ARGENTINA / NORTHERN SEGMENT VOLCANIC FIELD	PAPAGAYOS GROUP, CERRO GUADALOSO, MENDOZA	-34.311	-34.311	-69.0652	-69.0652	SAE			s_127310 [20550]	BASALT, ALKALINE [20550]	Quaternary				QUATERNARY [20550]					VOL			F		WR [20550]	44.99	1.18		13.73				10.21	10.9	14.48	0.17		0.97	2.14	0.36
Andean Southern Volcanic Arc Zones.csv	[20550]	7(11) SVZ rear-arc	Rodeo	North Mendoza	90	25	C Chile rear-arc	ANDEAN ARC / SOUTHERN ANDEAN VOLCANIC ZONE / ARGENTINA / NORTHERN SEGMENT VOLCANIC FIELD	RODEO GROUP, CERRO RODEO, MENDOZA	-34.4692	-34.4692	-68.8693	-68.8693	SAE			s_126078 [20550]	BASALT, ALKALINE [20550]	Quaternary				QUATERNARY [20550]					VOL			F		WR [20550]	47.48	1.58		14.87				10.07	12.12	6.67	0.17		1.34	3.04	0.56
Andean Southern Volcanic Arc Zones.csv	[20550]	7(11) SVZ rear-arc	Rodeo	North Mendoza	90	25	C Chile rear-arc	ANDEAN ARC / SOUTHERN ANDEAN VOLCANIC ZONE / ARGENTINA / NORTHERN SEGMENT VOLCANIC FIELD	RODEO GROUP, CERRO 1784, MENDOZA	-34.4785	-34.4785	-68.8604	-68.8604	SAE			s_126077 [20550]	BASALT, ALKALINE [20550]	Quaternary				QUATERNARY [20550]					VOL			F		WR [20550]	45.39	1.34		15.24				10.63	11.05	11.28	0.2		0.98	2.31	0.56
Andean Southern Volcanic Arc Zones.csv	[20550]	7(11) SVZ rear-arc	Rodeo	North Mendoza	90	25	C Chile rear-arc	ANDEAN ARC / SOUTHERN ANDEAN VOLCANIC ZONE / ARGENTINA / NORTHERN SEGMENT VOLCANIC FIELD	RODEO GROUP, CERRO LA CHILENA, MENDOZA	-34.4934	-34.4934	-68.8265	-68.8265	SAE			s_127327 [20550]	BASALT, ALKALINE [20550]	Quaternary				QUATERNARY [20550]					VOL			F		WR [20550]	47.4	1.44		15.72				9.78	11.1	8.77	0.18		1.24	3.04	0.47
Andean Southern Volcanic Arc Zones.csv	[20550]	7(11) SVZ rear-arc	Diamante	North Mendoza	90	25	C Chile rear-arc	ANDEAN ARC / SOUTHERN ANDEAN VOLCANIC ZONE / ARGENTINA / NORTHERN SEGMENT VOLCANIC FIELD	DIAMANTE GROUP, CERRO DIAMANTE, MENDOZA	-34.6378	-34.6378	-69.0848	-69.0848	SAE			s_123964 [20550]	BASALT, ALKALINE [20550]	Quaternary				QUATERNARY [20550]					VOL			F		WR [20550]	48.4	1.71		16.53				10.32	10.62	6.54	0.16		1.03	3.52	0.43
Andean Southern Volcanic Arc Zones.csv	[20550]	7(11) SVZ rear-arc	Diamante	North Mendoza	90	25	C Chile rear-arc	ANDEAN ARC / SOUTHERN ANDEAN VOLCANIC ZONE / ARGENTINA / NORTHERN SEGMENT VOLCANIC FIELD	DIAMANTE GROUP, LAS BOLAS NW CONE, MENDOZA	-34.5872	-34.5872	-69.1416	-69.1416	SAE			s_127437 [20550]	BASALT, ALKALINE [20550]	Quaternary				QUATERNARY [20550]					VOL			F		WR [20550]	47.8	1.44		16.02				10.01	11.15	9.5	0.18		1.17	2.99	0.38
Andean Southern Volcanic Arc Zones.csv	[20550]	7(11) SVZ rear-arc	Diamante	North Mendoza	90	25	C Chile rear-arc	ANDEAN ARC / SOUTHERN ANDEAN VOLCANIC ZONE / ARGENTINA / NORTHERN SEGMENT VOLCANIC FIELD	DIAMANTE GROUP, CERRO NEGRA DE SALINAS, MENDOZA	-34.818	-34.818	-68.815	-68.815	SAE			s_127001 [20550]	BASALT, ALKALINE [20550]	Quaternary				QUATERNARY [20550]					VOL			F		WR [20550]	45.51	1.43		15.77				9.81	12.27	9.38	0.17		1.13	3.28	0.47
Andean Southern Volcanic Arc Zones.csv	[20550]	7(11) SVZ rear-arc	LOMA DEL MEDIO	North Mendoza	90	25	C Chile rear-arc	ANDEAN ARC / SOUTHERN ANDEAN VOLCANIC ZONE / ARGENTINA / NORTHERN SEGMENT VOLCANIC FIELD	LOMA DEL MEDIO, MENDOZA	-34.5403	-34.5403	-69.2658	-69.2658	SAE			s_126083 [20550]	BASALT, ALKALINE [20550]	Quaternary				QUATERNARY [20550]					VOL			F		WR [20550]	48.88	1.32		15.43				9.12	10.2	9.46	0.17		1.36	2.9	0.46
Andean Southern Volcanic Arc Zones.csv	[20550]	7(11) SVZ rear-arc	CERRO LA LENA	North Mendoza	90	25	C Chile rear-arc	ANDEAN ARC / SOUTHERN ANDEAN VOLCANIC ZONE / ARGENTINA / NORTHERN SEGMENT VOLCANIC FIELD	CERRO LA LENA, MENDOZA	-34.7642	-34.7642	-69.421	-69.421	SAE			s_126085 [20550]	BASALT, ALKALINE [20550]	Quaternary				QUATERNARY [20550]					VOL			F		WR [20550]	47.48	1.81		17.19				9.87	10.7	6.79	0.18		1.62	3.14	0.57
Andean Southern Volcanic Arc Zones.csv	[20550]	7(11) SVZ rear-arc	LOS REYUNOS	North Mendoza	90	25	C Chile rear-arc	ANDEAN ARC / SOUTHERN ANDEAN VOLCANIC ZONE / ARGENTINA / NORTHERN SEGMENT VOLCANIC FIELD	LOS REYUNOS GROUP, AGUA DEL TORO, MENDOZA	-34.5923	-34.5923	-69.031	-69.031	SAE			s_123965 [20550]	BASALT, ALKALINE [20550]	Quaternary				QUATERNARY [20550]					VOL			F		WR [20550]	48.38	1.57		14.97				10.5	9.36	9.84	0.16		1.07	3.18	0.34
Andean Southern Volcanic Arc Zones.csv	[20550]	7(11) SVZ rear-arc	LOS REYUNOS	North Mendoza	90	25	C Chile rear-arc	ANDEAN ARC / SOUTHERN ANDEAN VOLCANIC ZONE / ARGENTINA / NORTHERN SEGMENT VOLCANIC FIELD	LOS REYUNOS GROUP, GALILEO VITALE, MENDOZA	-34.5935	-34.5935	-68.5571	-68.5571	SAE			s_127307 [20550]	BASALT, ALKALINE [20550]	Quaternary				QUATERNARY [20550]					VOL			F		WR [20550]	48.21	1.43		15.02				10.15	10.05	10.03	0.16		1.01	3.01	0.34
Andean Southern Volcanic Arc Zones.csv	[18602]	7(11) SVZ rear-arc	Diamante	North Mendoza	90	25	C Chile rear-arc	ANDEAN ARC / SOUTHERN ANDEAN VOLCANIC ZONE / ARGENTINA/CHILE / CERRO DIAMANTE	PAYENIA VOLCANIC PROVINCE, SOUTHERN MENDOZA, NORTHERN SEGMENT	-34.6327	-34.6327	-69.0804	-69.0804	SAE			s_126072 [18602]	BASALT, ALKALINE [18602]	Pleistocene				PLEISTOCENE-HOLOCENE [18602]					VOL					WR [18602]	48.51	1.44		15.54				8.74	12	7.71	0.17		1.25	2.96	0.44
Andean Southern Volcanic Arc Zones.csv	[18602]	7(11) SVZ rear-arc	Diamante	North Mendoza	90	25	C Chile rear-arc	ANDEAN ARC / SOUTHERN ANDEAN VOLCANIC ZONE / ARGENTINA/CHILE / CERRO DIAMANTE	PAYENIA VOLCANIC PROVINCE, SOUTHERN MENDOZA, NORTHERN SEGMENT	-34.5925	-34.5925	-69.028	-69.028	SAE			s_126076 [18602]	BASALT, ALKALINE [18602]	Pleistocene				PLEISTOCENE-HOLOCENE [18602]					VOL					WR [18602]	47.01	1.49		14.5				9.98	9.75	9.84	0.16		0.99	2.97	0.33
Andean Southern Volcanic Arc Zones.csv	[18602]	7(11) SVZ rear-arc	Diamante	North Mendoza	90	25	C Chile rear-arc	ANDEAN ARC / SOUTHERN ANDEAN VOLCANIC ZONE / ARGENTINA/CHILE / CERRO DIAMANTE	PAYENIA VOLCANIC PROVINCE, SOUTHERN MENDOZA, NORTHERN SEGMENT	-34.6534	-34.6534	-69.0328	-69.0328	SAE			s_126089 [18602]	BASALT, ALKALINE [18602]	Pleistocene				PLEISTOCENE-HOLOCENE [18602]					VOL					WR [18602]	46.75	1.13		14.75				9.39	10.33	11.61	0.17		1.06	2.59	0.28
Andean Southern Volcanic Arc Zones.csv	[18602]	7(11) SVZ rear-arc	Diamante	North Mendoza	90	25	C Chile rear-arc	ANDEAN ARC / SOUTHERN ANDEAN VOLCANIC ZONE / ARGENTINA/CHILE / CERRO DIAMANTE	PAYENIA VOLCANIC PROVINCE, SOUTHERN MENDOZA, NORTHERN SEGMENT	-34.6097	-34.6097	-69.0225	-69.0225	SAE			s_126092 [18602]	BASALT, ALKALINE [18602]	Pleistocene				PLEISTOCENE-HOLOCENE [18602]					VOL					WR [18602]	46.98	1.53		14.79				10.06	9.67	9.53	0.17		1.1	3.13	0.38
Andean Southern Volcanic Arc Zones.csv	[17913]	7(11) SVZ rear-arc	Diamante	North Mendoza	90	25	C Chile rear-arc	ANDEAN ARC / SOUTHERN ANDEAN VOLCANIC ZONE / ARGENTINA	CERRO CHATO	-34.4718	-34.4718	-68.873	-68.873	SAE			s_CL 274 [17913]	NOT GIVEN [17913]	Holocene									VOL			F		WR [17913]	47.0305	1.51227		16.3345				10.7561	11.1567	7.50125	0.170255		1.30195	3.4652	0.500751
Andean Southern Volcanic Arc Zones.csv	[17913]	7(11) SVZ rear-arc	Diamante	North Mendoza	90	25	C Chile rear-arc	ANDEAN ARC / SOUTHERN ANDEAN VOLCANIC ZONE / ARGENTINA	CERRO DIAMANTE	-34.5919	-34.5919	-69.0351	-69.0351	SAE			s_CL 277 [17913]	NOT GIVEN [17913]	Holocene									VOL			F		WR [17913]	47.9296	1.57031		14.893				11.8324	8.9918	9.71194	0.160032		1.04021	3.31066	0.35007
Andean Southern Volcanic Arc Zones.csv	[17913]	7(11) SVZ rear-arc	Diamante	North Mendoza	90	25	C Chile rear-arc	ANDEAN ARC / SOUTHERN ANDEAN VOLCANIC ZONE / ARGENTINA	DIAMANTE CHICO	-34.6598	-34.6598	-69.0322	-69.0322	SAE			s_CL 304 [17913]	NOT GIVEN [17913]	Holocene									VOL			F		WR [17913]	46.3728	1.25633		14.8126				11.0638	10.6484	10.9524	0.172239		1.20567	2.77609	0.435664
Andean Southern Volcanic Arc Zones.csv	[18602][19131]	7(11) SVZ rear-arc	Diamante	North Mendoza	90	25	C Chile rear-arc	ANDEAN ARC / SOUTHERN ANDEAN VOLCANIC ZONE / ARGENTINA/CHILE / CERRO DIAMANTE	PAYENIA VOLCANIC PROVINCE, SOUTHERN MENDOZA, NORTHERN SEGMENT, CRATER AREA	-34.6378	-34.6378	-69.0848	-69.0848	SAE			s_123964 [18602]	BASALT, ALKALINE [18602]	PLEISTOCENE-HOLOCENE [18602]				PLEISTOCENE-HOLOCENE [18602]					VOL					WR [18602]	48.767	1.425		15.976				8.83	11.671	7.32	0.159		1.271	3.04	0.43
Andean Southern Volcanic Arc Zones.csv	[18602][19131]	7(11) SVZ rear-arc	Diamante	North Mendoza	90	25	C Chile rear-arc	ANDEAN ARC / SOUTHERN ANDEAN VOLCANIC ZONE / ARGENTINA/CHILE / CERRO DIAMANTE	PAYENIA VOLCANIC PROVINCE, SOUTHERN MENDOZA, NORTHERN SEGMENT, PLATEAU LAVA	-34.5923	-34.5923	-69.031	-69.031	SAE			s_123965 [18602]	BASALT, ALKALINE [18602]	PLEISTOCENE-HOLOCENE [18602]				PLEISTOCENE-HOLOCENE [18602]					VOL					WR [18602]	47.922	1.553		14.83				10.4	9.272	9.745	0.159		1.061	3.15	0.337
Andean Southern Volcanic Arc Zones.csv	[18602][19131]	7(11) SVZ rear-arc	Alto	North Mendoza	90	25	C Chile rear-arc	ANDEAN ARC / SOUTHERN ANDEAN VOLCANIC ZONE / ARGENTINA	PAYENIA VOLCANIC PROVINCE, SOUTHERN MENDOZA, RETROARC, CERRO ALTO, TOP FLOW	-35.4649	-35.4649	-69.8562	-69.8562	SAE			s_126201 [18602]	BASALT, ALKALINE [18602]	PLEISTOCENE-HOLOCENE [18602]				PLEISTOCENE-HOLOCENE [18602]					VOL					WR [18602]	48.48	1.28		16.62				8.7	9.45	8.78	0.16		1.16	3.38	0.28
Andean Southern Volcanic Arc Zones.csv	[18602][19131]	7(11) SVZ rear-arc	Grande	North Mendoza	90	25	C Chile rear-arc	ANDEAN ARC / SOUTHERN ANDEAN VOLCANIC ZONE / ARGENTINA	PAYENIA VOLCANIC PROVINCE, SOUTHERN MENDOZA, RETROARC, RIO GRANDE	-36.0425	-36.0425	-69.7268	-69.7268	SAE			s_123915 [18602]	ANDESITE, BASALTIC [18602]	PLEISTOCENE-HOLOCENE [18602]				PLEISTOCENE-HOLOCENE [18602]					VOL					WR [18602]	52.257	1.115		17.163				8.14	8.356	6.598	0.135		1.063	3.68	0.348
Andean Southern Volcanic Arc Zones.csv	[17913]	7(11) SVZ rear-arc	CERRO CHATO	North Mendoza	90	25	C Chile rear-arc	ANDEAN ARC / SOUTHERN ANDEAN VOLCANIC ZONE / ARGENTINA	CERRO CHATO	-34.478	-34.478	-68.8423	-68.8423	SAE			s_CL 273 [17913]	NOT GIVEN [17913]	Holocene									VOL			F		WR [17913]	45.2575	1.32043		15.0993				11.642	10.8759	10.7751	0.191513		1.15916	2.81222	0.564459
Andean Southern Volcanic Arc Zones.csv	[18602]	7(11) SVZ rear-arc	Infiernillo	Infiernillo	91	25	C Chile rear-arc	ANDEAN ARC / SOUTHERN ANDEAN VOLCANIC ZONE / ARGENTINA	PAYENIA VOLCANIC PROVINCE, SOUTHERN MENDOZA, RETROARC, INFERNILLO, S OF LAGUNA BLANCA	-35.1405	-35.1405	-69.6616	-69.6616	SAE			s_126006 [18602]	BASALT, ALKALINE [18602]	PLEISTOCENE-HOLOCENE [18602]				PLEISTOCENE-HOLOCENE [18602]					VOL					WR [18602]	45.07	1.42		15.66				9.32	11.04	9.14	0.17		1.45	3.3	0.54
Andean Southern Volcanic Arc Zones.csv	[18602][19131]	7(11) SVZ rear-arc	Infiernillo	Infiernillo	91	25	C Chile rear-arc	ANDEAN ARC / SOUTHERN ANDEAN VOLCANIC ZONE / ARGENTINA	PAYENIA VOLCANIC PROVINCE, SOUTHERN MENDOZA, RETROARC, INFERNILLO, S OF LAGUNA BLANCA	-35.1404	-35.1404	-69.6872	-69.6872	SAE			s_126008 [18602]	BASALT, ALKALINE [18602]	PLEISTOCENE-HOLOCENE [18602]				PLEISTOCENE-HOLOCENE [18602]					VOL					WR [18602]	45.5	1.44		15.74				9.42	10.47	9.46	0.17		1.48	3.55	0.58
Andean Southern Volcanic Arc Zones.csv	[19131]	7(11) SVZ rear-arc	Infiernillo	Infiernillo	91	25	C Chile rear-arc	ANDEAN ARC / SOUTHERN ANDEAN VOLCANIC ZONE / ARGENTINA / LAGUNA BLANCA FLOW	PAYENIA VOLCANIC PROVINCE, SOUTHERN MENDOZA, RETROARC, INFERNILLO COMPLEX, LAGUNA BLANCA	-35.1032	-35.1032	-69.707	-69.707	SAE			s_126009 [19131]	BASALT [19131]	QUATERNARY [19131]				QUATERNARY [19131]					VOL					WR [19131]	50.7	1.05		17.06				7.98	9.38	7.72	0.14		1.18	3.41	0.27
Andean Southern Volcanic Arc Zones.csv	[18602][19131]	7(11) SVZ rear-arc	Nevado Volcanic Field	Nevado	92	25	C Chile rear-arc	ANDEAN ARC / SOUTHERN ANDEAN VOLCANIC ZONE / ARGENTINA / NEVADO VOLCANIC FIELD	PAYENIA VOLCANIC PROVINCE, SOUTHERN MENDOZA, CERRO FIERO	-35.9883	-35.9883	-69.0643	-69.0643	SAE			s_126221 [18602]	BASALT, ALKALINE [18602]	PLEISTOCENE-HOLOCENE [18602]				PLEISTOCENE-HOLOCENE [18602]					VOL					WR [18602]	46.06	1.46		14.65				9.1	10.54	10.17	0.16		1.42	3.24	0.62
Andean Southern Volcanic Arc Zones.csv	[18602][19131]	7(11) SVZ rear-arc	Nevado Volcanic Field	Nevado	92	25	C Chile rear-arc	ANDEAN ARC / SOUTHERN ANDEAN VOLCANIC ZONE / ARGENTINA / NEVADO VOLCANIC FIELD	PAYENIA VOLCANIC PROVINCE, SOUTHERN MENDOZA, AGUA DE TORRES	-36.1962	-36.1962	-68.1447	-68.1447	SAE			s_123940 [18602]	BASALT, ALKALINE [18602]	PLEISTOCENE-HOLOCENE [18602]				PLEISTOCENE-HOLOCENE [18602]					VOL					WR [18602]	46.505	1.581		15.184				9.42	9.828	9.778	0.163		1.5	3.37	0.67
Andean Southern Volcanic Arc Zones.csv	[18602][19131]	7(11) SVZ rear-arc	Nevado Volcanic Field	Nevado	92	25	C Chile rear-arc	ANDEAN ARC / SOUTHERN ANDEAN VOLCANIC ZONE / ARGENTINA / NEVADO VOLCANIC FIELD	PAYENIA VOLCANIC PROVINCE, SOUTHERN MENDOZA, CERRITOS MORADOS	-35.294	-35.294	-69.0119	-69.0119	SAE			s_126182 [18602]	BASALT, ALKALINE [18602]	PLEISTOCENE-HOLOCENE [18602]				PLEISTOCENE-HOLOCENE [18602]					VOL					WR [18602]	48.01	1.49		14.87				9.09	9.52	8.81	0.15		1.29	3.59	0.54
Andean Southern Volcanic Arc Zones.csv	[18602][19131]	7(11) SVZ rear-arc	Nevado Volcanic Field	Nevado	92	25	C Chile rear-arc	ANDEAN ARC / SOUTHERN ANDEAN VOLCANIC ZONE / ARGENTINA / NEVADO VOLCANIC FIELD	PAYENIA VOLCANIC PROVINCE, SOUTHERN MENDOZA, PERRO ATADO	-35.5995	-35.5995	-68.6397	-68.6397	SAE			s_123954 [18602]	BASALT, ALKALINE [18602]	PLEISTOCENE-HOLOCENE [18602]				PLEISTOCENE-HOLOCENE [18602]					VOL					WR [18602]	48.164	1.442		16.602				10.2	9.701	7.868	0.164		1.007	3.52	0.348
Andean Southern Volcanic Arc Zones.csv	[18602][19131]	7(11) SVZ rear-arc	Nevado Volcanic Field	Nevado	92	25	C Chile rear-arc	ANDEAN ARC / SOUTHERN ANDEAN VOLCANIC ZONE / ARGENTINA / NEVADO VOLCANIC FIELD	PAYENIA VOLCANIC PROVINCE, SOUTHERN MENDOZA, CERRO NEGRO	-34.7778	-34.7778	-68.3154	-68.3154	SAE			s_123963 [18602]	BASALT, ALKALINE [18602]	PLEISTOCENE-HOLOCENE [18602]				PLEISTOCENE-HOLOCENE [18602]					VOL					WR [18602]	47.651	1.684		16.278				10.16	10.453	6.434	0.158		1.016	3.47	0.419
Andean Southern Volcanic Arc Zones.csv	[18602][19131]	7(11) SVZ rear-arc	Nevado Volcanic Field	Nevado	92	25	C Chile rear-arc	ANDEAN ARC / SOUTHERN ANDEAN VOLCANIC ZONE / ARGENTINA / NEVADO VOLCANIC FIELD	PAYENIA VOLCANIC PROVINCE, SOUTHERN MENDOZA, CERRO NIHUIL	-35.0208	-35.0208	-68.6638	-68.6638	SAE			s_126189 [18602]	BASALT, ALKALINE [18602]	PLEISTOCENE-HOLOCENE [18602]				PLEISTOCENE-HOLOCENE [18602]					VOL					WR [18602]	47.95	1.6		15.67				10.4	9.44	7.98	0.18		0.96	3.2	0.43
Andean Southern Volcanic Arc Zones.csv	[18602][19131]	7(11) SVZ rear-arc	Nevado Volcanic Field	Nevado	92	25	C Chile rear-arc	ANDEAN ARC / SOUTHERN ANDEAN VOLCANIC ZONE / ARGENTINA / NEVADO VOLCANIC FIELD	PAYENIA VOLCANIC PROVINCE, SOUTHERN MENDOZA, CERRO REDONDO	-35.3285	-35.3285	-68.3743	-68.3743	SAE			s_126187 [18602]	BASALT, ALKALINE [18602]	PLEISTOCENE-HOLOCENE [18602]				PLEISTOCENE-HOLOCENE [18602]					VOL					WR [18602]	46.35	1.52		15.34				10.14	9.92	9.34	0.16		0.97	3.26	0.38
Andean Southern Volcanic Arc Zones.csv	[18602]	7(11) SVZ rear-arc	Nevado Volcanic Field	Nevado	92	25	C Chile rear-arc	ANDEAN ARC / SOUTHERN ANDEAN VOLCANIC ZONE / ARGENTINA / NEVADO VOLCANIC FIELD	PAYENIA VOLCANIC PROVINCE, SOUTHERN MENDOZA, CERRO CHACAICO	-36.1515	-36.1515	-68.6894	-68.6894	SAE			s_126216 [18602]	BASALT, ALKALINE [18602]	PLEISTOCENE-HOLOCENE [18602]				PLEISTOCENE-HOLOCENE [18602]					VOL					WR [18602]	48.44	1.58		15.3				9.29	8.74	8.49	0.15		1.19	3.87	0.44
Andean Southern Volcanic Arc Zones.csv	[18602]	7(11) SVZ rear-arc	Nevado Volcanic Field	Nevado	92	25	C Chile rear-arc	ANDEAN ARC / SOUTHERN ANDEAN VOLCANIC ZONE / ARGENTINA / NEVADO VOLCANIC FIELD	PAYENIA VOLCANIC PROVINCE, SOUTHERN MENDOZA, CERRO CAPACHO	-36.102	-36.102	-68.7977	-68.7977	SAE			s_126227 [18602]	BASALT, ALKALINE [18602]	PLEISTOCENE-HOLOCENE [18602]				PLEISTOCENE-HOLOCENE [18602]					VOL					WR [18602]	46.43	1.46		14.67				9.45	9.92	10.73	0.17		1.41	3.21	0.59
Andean Southern Volcanic Arc Zones.csv	[18602]	7(11) SVZ rear-arc	Nevado Volcanic Field	Nevado	92	25	C Chile rear-arc	ANDEAN ARC / SOUTHERN ANDEAN VOLCANIC ZONE / ARGENTINA / NEVADO VOLCANIC FIELD	PAYENIA VOLCANIC PROVINCE, SOUTHERN MENDOZA, CERRO DEL MONTE	-35.982	-35.982	-68.9742	-68.9742	SAE			s_126205 [18602]	BASALT, ALKALINE [18602]	PLEISTOCENE-HOLOCENE [18602]				PLEISTOCENE-HOLOCENE [18602]					VOL					WR [18602]	45.45	1.59		14.97				10.17	10.14	10.2	0.18		1.34	3.18	0.7
Andean Southern Volcanic Arc Zones.csv	[18602]	7(11) SVZ rear-arc	Nevado Volcanic Field	Nevado	92	25	C Chile rear-arc	ANDEAN ARC / SOUTHERN ANDEAN VOLCANIC ZONE / ARGENTINA / NEVADO VOLCANIC FIELD	PAYENIA VOLCANIC PROVINCE, SOUTHERN MENDOZA, CERRO LAS VACAS	-35.5141	-35.5141	-68.7614	-68.7614	SAE			s_123955 [18602]	BASALT, ALKALINE [18602]	PLEISTOCENE-HOLOCENE [18602]				PLEISTOCENE-HOLOCENE [18602]					VOL					WR [18602]	47.319	1.439		15.04				10.15	9.456	10.01	0.165		1.269	3.32	0.44
Andean Southern Volcanic Arc Zones.csv	[18602]	7(11) SVZ rear-arc	Nevado Volcanic Field	Nevado	92	25	C Chile rear-arc	ANDEAN ARC / SOUTHERN ANDEAN VOLCANIC ZONE / ARGENTINA / NEVADO VOLCANIC FIELD	PAYENIA VOLCANIC PROVINCE, SOUTHERN MENDOZA, CERRO AMARILLO	-35.4659	-35.4659	-68.7778	-68.7778	SAE			s_123957 [18602]	BASALT, ALKALINE [18602]	PLEISTOCENE-HOLOCENE [18602]				PLEISTOCENE-HOLOCENE [18602]					VOL					WR [18602]	46.454	1.373		15.143				9.83	10.375	9.988	0.163		1.015	3.15	0.456
Andean Southern Volcanic Arc Zones.csv	[18602]	7(11) SVZ rear-arc	Nevado Volcanic Field	Nevado	92	25	C Chile rear-arc	ANDEAN ARC / SOUTHERN ANDEAN VOLCANIC ZONE / ARGENTINA / NEVADO VOLCANIC FIELD	PAYENIA VOLCANIC PROVINCE, SOUTHERN MENDOZA, CERRO TRINTRICA	-35.3654	-35.3654	-68.717	-68.717	SAE			s_123958 [18602]	BASALT, ALKALINE [18602]	PLEISTOCENE-HOLOCENE [18602]				PLEISTOCENE-HOLOCENE [18602]					VOL					WR [18602]	46.356	1.487		15.459				10.08	10.813	9.502	0.167		1.082	3.17	0.415
Andean Southern Volcanic Arc Zones.csv	[18602]	7(11) SVZ rear-arc	Nevado Volcanic Field	Nevado	92	25	C Chile rear-arc	ANDEAN ARC / SOUTHERN ANDEAN VOLCANIC ZONE / ARGENTINA / NEVADO VOLCANIC FIELD	PAYENIA VOLCANIC PROVINCE, SOUTHERN MENDOZA, CERRO EL MASUCO	-35.6745	-35.6745	-68.6942	-68.6942	SAE			s_123953 [18602]	BASALT, ALKALINE [18602]	PLEISTOCENE-HOLOCENE [18602]				PLEISTOCENE-HOLOCENE [18602]					VOL					WR [18602]	47.156	1.452		14.746				9.76	9.693	10.199	0.162		1.229	3.12	0.472
Andean Southern Volcanic Arc Zones.csv	[18602]	7(11) SVZ rear-arc	Nevado Volcanic Field	Nevado	92	25	C Chile rear-arc	ANDEAN ARC / SOUTHERN ANDEAN VOLCANIC ZONE / ARGENTINA / NEVADO VOLCANIC FIELD	PAYENIA VOLCANIC PROVINCE, SOUTHERN MENDOZA, W OF PONON TREHUE	-35.1973	-35.1973	-68.2786	-68.2786	SAE			s_123959 [18602]	BASALT, ALKALINE [18602]	PLEISTOCENE-HOLOCENE [18602]				PLEISTOCENE-HOLOCENE [18602]					VOL					WR [18602]	48.137	1.508		16.688				8.74	11.046	6.15	0.151		1.119	3.51	0.455
Andean Southern Volcanic Arc Zones.csv	[18602]	7(11) SVZ rear-arc	Nevado Volcanic Field	Nevado	92	25	C Chile rear-arc	ANDEAN ARC / SOUTHERN ANDEAN VOLCANIC ZONE / ARGENTINA / NEVADO VOLCANIC FIELD	PAYENIA VOLCANIC PROVINCE, SOUTHERN MENDOZA, PONON TREHUE	-35.2085	-35.2085	-68.2608	-68.2608	SAE			s_126156 [18602]	BASALT, ALKALINE [18602]	PLEISTOCENE-HOLOCENE [18602]				PLEISTOCENE-HOLOCENE [18602]					VOL					WR [18602]	46.97	1.58		16.6				9.69	10.5	6.94	0.16		0.97	3.56	0.33
Andean Southern Volcanic Arc Zones.csv	[18602]	7(11) SVZ rear-arc	Nevado Volcanic Field	Nevado	92	25	C Chile rear-arc	ANDEAN ARC / SOUTHERN ANDEAN VOLCANIC ZONE / ARGENTINA / NEVADO VOLCANIC FIELD	PAYENIA VOLCANIC PROVINCE, SOUTHERN MENDOZA, PONON TREHUE	-35.2043	-35.2043	-68.273	-68.273	SAE			s_123960 [18602]	BASALT, ALKALINE [18602]	PLEISTOCENE-HOLOCENE [18602]				PLEISTOCENE-HOLOCENE [18602]					VOL					WR [18602]	47.77	1.476		16.31				9.98	10.149	7.701	0.158		0.939	3.33	0.336
Andean Southern Volcanic Arc Zones.csv	[18602]	7(11) SVZ rear-arc	Nevado Volcanic Field	Nevado	92	25	C Chile rear-arc	ANDEAN ARC / SOUTHERN ANDEAN VOLCANIC ZONE / ARGENTINA / NEVADO VOLCANIC FIELD	PAYENIA VOLCANIC PROVINCE, SOUTHERN MENDOZA, CERRO LOS TOLDOS	-35.2883	-35.2883	-68.24	-68.24	SAE			s_126160 [18602]	BASALT, ALKALINE [18602]	PLEISTOCENE-HOLOCENE [18602]				PLEISTOCENE-HOLOCENE [18602]					VOL					WR [18602]	49	1.64		16.11				10.35	9.36	7.01	0.16		0.88	3.78	0.34
Andean Southern Volcanic Arc Zones.csv	[18602]	7(11) SVZ rear-arc	Nevado Volcanic Field	Nevado	92	25	C Chile rear-arc	ANDEAN ARC / SOUTHERN ANDEAN VOLCANIC ZONE / ARGENTINA / NEVADO VOLCANIC FIELD	PAYENIA VOLCANIC PROVINCE, SOUTHERN MENDOZA, VALLE GRANDE	-34.7862	-34.7862	-68.4471	-68.4471	SAE			s_126207 [18602]	BASALT, ALKALINE [18602]	PLEISTOCENE-HOLOCENE [18602]				PLEISTOCENE-HOLOCENE [18602]					VOL					WR [18602]	46.05	1.55		15.57				9.7	11.09	9.07	0.17		1.11	2.93	0.48
Andean Southern Volcanic Arc Zones.csv	[18602]	7(11) SVZ rear-arc	Nevado Volcanic Field	Nevado	92	25	C Chile rear-arc	ANDEAN ARC / SOUTHERN ANDEAN VOLCANIC ZONE / ARGENTINA / NEVADO VOLCANIC FIELD	PAYENIA VOLCANIC PROVINCE, SOUTHERN MENDOZA, LOMAS AMARILLAS	-35.8878	-35.8878	-68.0837	-68.0837	SAE			s_126212 [18602]	BASALT, ALKALINE [18602]	PLEISTOCENE-HOLOCENE [18602]				PLEISTOCENE-HOLOCENE [18602]					VOL					WR [18602]	45.7	1.65		14.89				9.4	11.8	9.22	0.17		1.35	2.99	0.97
Andean Southern Volcanic Arc Zones.csv	[18602]	7(11) SVZ rear-arc	Nevado Volcanic Field	Nevado	92	25	C Chile rear-arc	ANDEAN ARC / SOUTHERN ANDEAN VOLCANIC ZONE / ARGENTINA / NEVADO VOLCANIC FIELD	PAYENIA VOLCANIC PROVINCE, SOUTHERN MENDOZA, CERRO LOS CHANCHOS	-35.1549	-35.1549	-68.0135	-68.0135	SAE			s_126166 [18602]	BASALT, ALKALINE [18602]	PLEISTOCENE-HOLOCENE [18602]				PLEISTOCENE-HOLOCENE [18602]					VOL					WR [18602]	46.45	1.5		14.79				10.55	9.36	11.14	0.17		0.84	2.9	0.37
Andean Southern Volcanic Arc Zones.csv	[18602]	7(11) SVZ rear-arc	Nevado Volcanic Field	Nevado	92	25	C Chile rear-arc	ANDEAN ARC / SOUTHERN ANDEAN VOLCANIC ZONE / ARGENTINA / NEVADO VOLCANIC FIELD	PAYENIA VOLCANIC PROVINCE, SOUTHERN MENDOZA, NE OF PUNTA DEL AGUA	-35.4773	-35.4773	-67.9674	-67.9674	SAE			s_126168 [18602]	BASALT, ALKALINE [18602]	PLEISTOCENE-HOLOCENE [18602]				PLEISTOCENE-HOLOCENE [18602]					VOL					WR [18602]	45.71	1.67		15.21				10.05	10.35	9.06	0.17		1.28	3.48	0.64
Andean Southern Volcanic Arc Zones.csv	[18602]	7(11) SVZ rear-arc	Nevado Volcanic Field	Nevado	92	25	C Chile rear-arc	ANDEAN ARC / SOUTHERN ANDEAN VOLCANIC ZONE / ARGENTINA / NEVADO VOLCANIC FIELD	PAYENIA VOLCANIC PROVINCE, SOUTHERN MENDOZA, CERRO CHICO	-35.2399	-35.2399	-68.9194	-68.9194	SAE			s_126184 [18602]	BASALT, ALKALINE [18602]	PLEISTOCENE-HOLOCENE [18602]				PLEISTOCENE-HOLOCENE [18602]					VOL					WR [18602]	47.39	1.57		14.97				9.15	9.88	9.09	0.16		1.41	3.39	0.59
Andean Southern Volcanic Arc Zones.csv	[18602]	7(11) SVZ rear-arc	Nevado Volcanic Field	Nevado	92	25	C Chile rear-arc	ANDEAN ARC / SOUTHERN ANDEAN VOLCANIC ZONE / ARGENTINA / NEVADO VOLCANIC FIELD	PAYENIA VOLCANIC PROVINCE, SOUTHERN MENDOZA, CERRO LA CHILENA	-35.2501	-35.2501	-68.2534	-68.2534	SAE			s_123961 [18602]	BASALT, ALKALINE [18602]	PLEISTOCENE-HOLOCENE [18602]				PLEISTOCENE-HOLOCENE [18602]					VOL					WR [18602]	47.095	1.421		15.721				10.3	9.757	9.567	0.165		0.959	3.16	0.392
Andean Southern Volcanic Arc Zones.csv	[18602]	7(11) SVZ rear-arc	Nevado Volcanic Field	Nevado	92	25	C Chile rear-arc	ANDEAN ARC / SOUTHERN ANDEAN VOLCANIC ZONE / ARGENTINA / NEVADO VOLCANIC FIELD	PAYENIA VOLCANIC PROVINCE, SOUTHERN MENDOZA, CERRO SAN PEDRO	-35.3503	-35.3503	-68.3242	-68.3242	SAE			s_126186 [18602]	BASALT, ALKALINE [18602]	PLEISTOCENE-HOLOCENE [18602]				PLEISTOCENE-HOLOCENE [18602]					VOL					WR [18602]	47.37	1.57		14.72				9.7	9.14	9.32	0.16		1.28	3.54	0.44
Andean Southern Volcanic Arc Zones.csv	[18602]	7(11) SVZ rear-arc	Nevado Volcanic Field	Nevado	92	25	C Chile rear-arc	ANDEAN ARC / SOUTHERN ANDEAN VOLCANIC ZONE / ARGENTINA / NEVADO VOLCANIC FIELD	PAYENIA VOLCANIC PROVINCE, SOUTHERN MENDOZA, CANADA HONDA	-35.4372	-35.4372	-68.068	-68.068	SAE			s_126209 [18602]	BASALT, ALKALINE [18602]	PLEISTOCENE-HOLOCENE [18602]				PLEISTOCENE-HOLOCENE [18602]					VOL					WR [18602]	49.22	1.67		15.19				10.56	8.73	7.66	0.16		0.91	3.55	0.29
Andean Southern Volcanic Arc Zones.csv	[3648]	7(11) SVZ rear-arc	Nevado Volcanic Field	Nevado	92	25	C Chile rear-arc	ANDEAN ARC / SOUTHERN ANDEAN VOLCANIC ZONE / CHILE / PLANCHON		-35.25	-35.25	-68.8	-68.8	SAE			s_2PL24 [3648]	ANDESITE, BASALTIC [3648]	QUATERNARY [3648]				QUATERNARY [3648]					VOL					WR [3648]	52.16	0.86		16.22		9.61			7.75	8.7	0.15		1.07	3.34	0.21
Andean Southern Volcanic Arc Zones.csv	[3648]	7(11) SVZ rear-arc	Nevado Volcanic Field	Nevado	92	25	C Chile rear-arc	ANDEAN ARC / SOUTHERN ANDEAN VOLCANIC ZONE / CHILE / PLANCHON		-35.25	-35.25	-68.8	-68.8	SAE			s_2PL25 [3648]	ANDESITE, BASALTIC [3648]	QUATERNARY [3648]				QUATERNARY [3648]					VOL					WR [3648]	52.57	0.89		16.66		9.27			8.14	7.56	0.15		1.1	3.26	0.21
Andean Southern Volcanic Arc Zones.csv	[3648]	7(11) SVZ rear-arc	Nevado Volcanic Field	Nevado	92	25	C Chile rear-arc	ANDEAN ARC / SOUTHERN ANDEAN VOLCANIC ZONE / CHILE / PLANCHON		-35.25	-35.25	-68.8	-68.8	SAE			s_2PL18 [3648]	ANDESITE, BASALTIC [3648]	QUATERNARY [3648]				QUATERNARY [3648]					VOL					WR [3648]	52.47	0.91		17.17		9.18			8.72	7.03	0.15		0.99	3.26	0.2
Andean Southern Volcanic Arc Zones.csv	[3648]	7(11) SVZ rear-arc	Nevado Volcanic Field	Nevado	92	25	C Chile rear-arc	ANDEAN ARC / SOUTHERN ANDEAN VOLCANIC ZONE / CHILE / PLANCHON		-35.25	-35.25	-68.8	-68.8	SAE			s_2PL19 [3648]	ANDESITE, BASALTIC [3648]	QUATERNARY [3648]				QUATERNARY [3648]					VOL					WR [3648]	52.55	0.91		17.36		9.12			8.72	6.8	0.15		0.97	3.33	0.2
Andean Southern Volcanic Arc Zones.csv	[3648]	7(11) SVZ rear-arc	Nevado Volcanic Field	Nevado	92	25	C Chile rear-arc	ANDEAN ARC / SOUTHERN ANDEAN VOLCANIC ZONE / CHILE / PLANCHON		-35.25	-35.25	-68.8	-68.8	SAE			s_1PL8 [3648]	ANDESITE, BASALTIC [3648]	QUATERNARY [3648]				QUATERNARY [3648]					VOL					WR [3648]	51.73	0.97		17.86		9.56			8.88	6.58	0.16		0.83	3.35	0.22
Andean Southern Volcanic Arc Zones.csv	[3648]	7(11) SVZ rear-arc	Nevado Volcanic Field	Nevado	92	25	C Chile rear-arc	ANDEAN ARC / SOUTHERN ANDEAN VOLCANIC ZONE / CHILE / PLANCHON		-35.25	-35.25	-68.8	-68.8	SAE			s_1PL9 [3648]	ANDESITE, BASALTIC [3648]	QUATERNARY [3648]				QUATERNARY [3648]					VOL					WR [3648]	51.95	0.97		17.77		9.57			8.9	6.57	0.15		0.85	3.48	0.22
Andean Southern Volcanic Arc Zones.csv	[3648]	7(11) SVZ rear-arc	Nevado Volcanic Field	Nevado	92	25	C Chile rear-arc	ANDEAN ARC / SOUTHERN ANDEAN VOLCANIC ZONE / CHILE / PLANCHON		-35.25	-35.25	-68.8	-68.8	SAE			s_1PL5 [3648]	ANDESITE, BASALTIC [3648]	QUATERNARY [3648]				QUATERNARY [3648]					VOL					WR [3648]	52.51	0.97		17.59		9.36			8.85	6.5	0.16		0.95	3.37	0.22
Andean Southern Volcanic Arc Zones.csv	[3648]	7(11) SVZ rear-arc	Nevado Volcanic Field	Nevado	92	25	C Chile rear-arc	ANDEAN ARC / SOUTHERN ANDEAN VOLCANIC ZONE / CHILE / PLANCHON		-35.25	-35.25	-68.8	-68.8	SAE			s_1PL7 [3648]	ANDESITE, BASALTIC [3648]	QUATERNARY [3648]				QUATERNARY [3648]					VOL					WR [3648]	51.74	0.97		17.72		9.51			8.83	6.47	0.15		0.88	3.46	0.22
Andean Southern Volcanic Arc Zones.csv	[3648]	7(11) SVZ rear-arc	Nevado Volcanic Field	Nevado	92	25	C Chile rear-arc	ANDEAN ARC / SOUTHERN ANDEAN VOLCANIC ZONE / CHILE / PLANCHON		-35.25	-35.25	-68.8	-68.8	SAE			s_1PL4 [3648]	ANDESITE, BASALTIC [3648]	QUATERNARY [3648]				QUATERNARY [3648]					VOL					WR [3648]	52.27	0.96		17.59		9.25			8.86	6.41	0.15		0.96	3.57	0.22
Andean Southern Volcanic Arc Zones.csv	[3648]	7(11) SVZ rear-arc	Nevado Volcanic Field	Nevado	92	25	C Chile rear-arc	ANDEAN ARC / SOUTHERN ANDEAN VOLCANIC ZONE / CHILE / PLANCHON		-35.25	-35.25	-68.8	-68.8	SAE			s_2PL20 [3648]	ANDESITE, BASALTIC [3648]	QUATERNARY [3648]				QUATERNARY [3648]					VOL					WR [3648]	52.47	1		17.46		9.19			8.89	6.23	0.15		1.02	3.34	0.23
Andean Southern Volcanic Arc Zones.csv	[3648]	7(11) SVZ rear-arc	Nevado Volcanic Field	Nevado	92	25	C Chile rear-arc	ANDEAN ARC / SOUTHERN ANDEAN VOLCANIC ZONE / CHILE / PLANCHON		-35.25	-35.25	-68.8	-68.8	SAE			s_2PL11 [3648]	ANDESITE, BASALTIC [3648]	QUATERNARY [3648]				QUATERNARY [3648]					VOL					WR [3648]	53.39	0.99		17.5		9.09			7.94	6.12	0.14		1.23	3.67	0.25
Andean Southern Volcanic Arc Zones.csv	[3648]	7(11) SVZ rear-arc	Nevado Volcanic Field	Nevado	92	25	C Chile rear-arc	ANDEAN ARC / SOUTHERN ANDEAN VOLCANIC ZONE / CHILE / PLANCHON		-35.25	-35.25	-68.8	-68.8	SAE			s_2PL2 [3648]	ANDESITE, BASALTIC [3648]	QUATERNARY [3648]				QUATERNARY [3648]					VOL					WR [3648]	52.26	1.07		17.99		9.27			8.48	6.06	0.15		1.07	3.58	0.26
Andean Southern Volcanic Arc Zones.csv	[3648]	7(11) SVZ rear-arc	Nevado Volcanic Field	Nevado	92	25	C Chile rear-arc	ANDEAN ARC / SOUTHERN ANDEAN VOLCANIC ZONE / CHILE / PLANCHON		-35.25	-35.25	-68.8	-68.8	SAE			s_PLII2 [3648]	ANDESITE, BASALTIC [3648]	QUATERNARY [3648]				QUATERNARY [3648]					VOL					WR [3648]	52.41	1.03		17.5		9.43			8.35	6.71	0.15		0.94	3.69	0.24
Andean Southern Volcanic Arc Zones.csv	[3648]	7(11) SVZ rear-arc	Nevado Volcanic Field	Nevado	92	25	C Chile rear-arc	ANDEAN ARC / SOUTHERN ANDEAN VOLCANIC ZONE / CHILE / PLANCHON		-35.25	-35.25	-68.8	-68.8	SAE			s_PLII1 [3648]	ANDESITE, BASALTIC [3648]	QUATERNARY [3648]				QUATERNARY [3648]					VOL					WR [3648]	52.63	1.23		16.36		10.28			7.68	6.45	0.17		1.44	3.51	0.33
Andean Southern Volcanic Arc Zones.csv	[3648]	7(11) SVZ rear-arc	Nevado Volcanic Field	Nevado	92	25	C Chile rear-arc	ANDEAN ARC / SOUTHERN ANDEAN VOLCANIC ZONE / CHILE / PLANCHON		-35.25	-35.25	-68.8	-68.8	SAE			s_PLII4 [3648]	ANDESITE, BASALTIC [3648]	QUATERNARY [3648]				QUATERNARY [3648]					VOL					WR [3648]	53.04	1.09		16.96		9.44			8.03	6.36	0.15		1.17	3.58	0.28
Andean Southern Volcanic Arc Zones.csv	[3996]	7(11) SVZ rear-arc	Nevado Volcanic Field	Nevado	92	25	C Chile rear-arc	ANDEAN ARC / SOUTHERN ANDEAN VOLCANIC ZONE / CHILE / PLANCHON		-35.25	-35.25	-68.8	-68.8	SAE			s_1PL19 [3996]	BASALT [3996]	QUATERNARY [3996]				QUATERNARY [3996]					VOL					WR [3996]	52.55	0.91		17.36		9.12			8.72	6.8	0.15		0.97	3.33	0.2
Andean Southern Volcanic Arc Zones.csv	[3996]	7(11) SVZ rear-arc	Nevado Volcanic Field	Nevado	92	25	C Chile rear-arc	ANDEAN ARC / SOUTHERN ANDEAN VOLCANIC ZONE / CHILE / PLANCHON		-35.25	-35.25	-68.8	-68.8	SAE			s_3PL7 [3996]	BASALT [3996]	QUATERNARY [3996]				QUATERNARY [3996]					VOL					WR [3996]	51.74	0.97		17.72		9.51			8.83	6.47	0.15		0.88	3.46	0.22
Andean Southern Volcanic Arc Zones.csv	[17913]	7(11) SVZ rear-arc	TRINTRICA	Nevado	92	25	C Chile rear-arc	ANDEAN ARC / SOUTHERN ANDEAN VOLCANIC ZONE / ARGENTINA	TRINTRICA	-35.3737	-35.3737	-68.7379	-68.7379	SAE			s_CL 308 [17913]	NOT GIVEN [17913]	Holocene									VOL			F		WR [17913]	46.246	1.48953		15.5495				11.3225	11.1212	9.20894	0.171095		1.03663	3.20048	0.43277
Andean Southern Volcanic Arc Zones.csv	[17913]	7(11) SVZ rear-arc		Nevado	92	25	C Chile rear-arc	ANDEAN ARC / SOUTHERN ANDEAN VOLCANIC ZONE / ARGENTINA	CONES SE OF EL NIHUIL	-35.3255	-35.3255	-68.3877	-68.3877	SAE			s_CL 318 [17913]	NOT GIVEN [17913]	Holocene									VOL			F		WR [17913]	48.2121	1.53815		15.6412				11.6061	9.50859	8.37994	0.159808		0.898921	3.48582	0.369557
Andean Southern Volcanic Arc Zones.csv	[18602]	7(11) SVZ rear-arc	Llancanelo Volcanic Field	Llancanelo	93	25	C Chile rear-arc	ANDEAN ARC / SOUTHERN ANDEAN VOLCANIC ZONE / ARGENTINA / LLANCANELO VOLCANIC FIELD	PAYENIA VOLCANIC PROVINCE, SOUTHERN MENDOZA, MALACAR	-35.7094	-35.7094	-69.4631	-69.4631	SAE			s_123903 [18602]	BASALT, ALKALINE [18602]	PLEISTOCENE-HOLOCENE [18602]				PLEISTOCENE-HOLOCENE [18602]					VOL					WR [18602]	46.977	1.535		15.075				9.93	10.019	10.037	0.157		1.002	3.27	0.417
Andean Southern Volcanic Arc Zones.csv	[18602]	7(11) SVZ rear-arc	Llancanelo Volcanic Field	Llancanelo	93	25	C Chile rear-arc	ANDEAN ARC / SOUTHERN ANDEAN VOLCANIC ZONE / ARGENTINA / LLANCANELO VOLCANIC FIELD	PAYENIA VOLCANIC PROVINCE, SOUTHERN MENDOZA, CERRO TRAPAL	-35.6109	-35.6109	-69.2053	-69.2053	SAE			s_123907 [18602]	BASALT, ALKALINE [18602]	PLEISTOCENE-HOLOCENE [18602]				PLEISTOCENE-HOLOCENE [18602]					VOL					WR [18602]	47.406	1.473		16.833				10.09	10.934	6.891	0.162		0.794	3.46	0.335
Andean Southern Volcanic Arc Zones.csv	[18602]	7(11) SVZ rear-arc	Llancanelo Volcanic Field	Llancanelo	93	25	C Chile rear-arc	ANDEAN ARC / SOUTHERN ANDEAN VOLCANIC ZONE / ARGENTINA / LLANCANELO VOLCANIC FIELD	PAYENIA VOLCANIC PROVINCE, SOUTHERN MENDOZA, PATAHULILOSO	-35.7668	-35.7668	-69.3176	-69.3176	SAE			s_123908 [18602]	BASALT, ALKALINE [18602]	PLEISTOCENE-HOLOCENE [18602]				PLEISTOCENE-HOLOCENE [18602]					VOL					WR [18602]	47.865	1.471		16.077				10.44	9.953	8.298	0.161		0.807	3.55	0.339
Andean Southern Volcanic Arc Zones.csv	[18602]	7(11) SVZ rear-arc	Llancanelo Volcanic Field	Llancanelo	93	25	C Chile rear-arc	ANDEAN ARC / SOUTHERN ANDEAN VOLCANIC ZONE / ARGENTINA / LLANCANELO VOLCANIC FIELD	PAYENIA VOLCANIC PROVINCE, SOUTHERN MENDOZA, CERRO LOS POZOS LLANCANELO	-35.7583	-35.7583	-69.1745	-69.1745	SAE			s_123911 [18602]	BASALT, ALKALINE [18602]	PLEISTOCENE-HOLOCENE [18602]				PLEISTOCENE-HOLOCENE [18602]					VOL					WR [18602]	49.3	1.512		15.657				10.5	8.987	8.43	0.153		0.721	3.36	0.253
Andean Southern Volcanic Arc Zones.csv	[18602]	7(11) SVZ rear-arc	Llancanelo Volcanic Field	Llancanelo	93	25	C Chile rear-arc	ANDEAN ARC / SOUTHERN ANDEAN VOLCANIC ZONE / ARGENTINA / LLANCANELO VOLCANIC FIELD	PAYENIA VOLCANIC PROVINCE, SOUTHERN MENDOZA, LAS CHACRAS	-35.6086	-35.6086	-69.5104	-69.5104	SAE			s_123912 [18602]	BASALT, ALKALINE [18602]	PLEISTOCENE-HOLOCENE [18602]				PLEISTOCENE-HOLOCENE [18602]					VOL					WR [18602]	47.046	1.815		16.407				10.27	10.758	6.909	0.155		0.95	3.22	0.386
Andean Southern Volcanic Arc Zones.csv	[18602]	7(11) SVZ rear-arc	Llancanelo Volcanic Field	Llancanelo	93	25	C Chile rear-arc	ANDEAN ARC / SOUTHERN ANDEAN VOLCANIC ZONE / ARGENTINA / LLANCANELO VOLCANIC FIELD	PAYENIA VOLCANIC PROVINCE, SOUTHERN MENDOZA, CERRO LOS LEONES	-35.4977	-35.4977	-69.4513	-69.4513	SAE			s_126203 [18602]	BASALT, ALKALINE [18602]	PLEISTOCENE-HOLOCENE [18602]				PLEISTOCENE-HOLOCENE [18602]					VOL					WR [18602]	47.44	1.53		15.67				11.01	9.08	9.47	0.17		0.66	3.18	0.27
Andean Southern Volcanic Arc Zones.csv	[18602]	7(11) SVZ rear-arc	Llancanelo Volcanic Field	Llancanelo	93	25	C Chile rear-arc	ANDEAN ARC / SOUTHERN ANDEAN VOLCANIC ZONE / ARGENTINA / LLANCANELO VOLCANIC FIELD	PAYENIA VOLCANIC PROVINCE, SOUTHERN MENDOZA, CERRITOS COLORADOS	-35.8714	-35.8714	-69.1774	-69.1774	SAE			s_126262 [18602]	BASALT, ALKALINE [18602]	PLEISTOCENE-HOLOCENE [18602]				PLEISTOCENE-HOLOCENE [18602]					VOL					WR [18602]	46.79	1.65		16.57				10.1	10.1	7.97	0.16		0.96	3.23	0.44
Andean Southern Volcanic Arc Zones.csv	[18602]	7(11) SVZ rear-arc	Llancanelo Volcanic Field	Llancanelo	93	25	C Chile rear-arc	ANDEAN ARC / SOUTHERN ANDEAN VOLCANIC ZONE / ARGENTINA / LLANCANELO VOLCANIC FIELD	PAYENIA VOLCANIC PROVINCE, SOUTHERN MENDOZA, VOLCAN JARILLOSO	-35.663	-35.663	-69.525	-69.525	SAE			s_126191 [18602]	BASALT, ALKALINE [18602]	PLEISTOCENE-HOLOCENE [18602]				PLEISTOCENE-HOLOCENE [18602]					VOL					WR [18602]	46.21	1.71		16.27				10.73	10.21	8.78	0.16		0.88	3.09	0.38
Andean Southern Volcanic Arc Zones.csv	[18602]	7(11) SVZ rear-arc	Llancanelo Volcanic Field	Llancanelo	93	25	C Chile rear-arc	ANDEAN ARC / SOUTHERN ANDEAN VOLCANIC ZONE / ARGENTINA / LLANCANELO VOLCANIC FIELD	PAYENIA VOLCANIC PROVINCE, SOUTHERN MENDOZA, CERRO CHACHAO	-35.7266	-35.7266	-69.4448	-69.4448	SAE			s_126193 [18602]	BASALT, ALKALINE [18602]	PLEISTOCENE-HOLOCENE [18602]				PLEISTOCENE-HOLOCENE [18602]					VOL					WR [18602]	47.61	1.74		16.21				10.07	9.83	7.97	0.16		0.95	3.42	0.42
Andean Southern Volcanic Arc Zones.csv	[18602]	7(11) SVZ rear-arc	Llancanelo Volcanic Field	Llancanelo	93	25	C Chile rear-arc	ANDEAN ARC / SOUTHERN ANDEAN VOLCANIC ZONE / ARGENTINA / LLANCANELO VOLCANIC FIELD	PAYENIA VOLCANIC PROVINCE, SOUTHERN MENDOZA, LAS OVEJAS	-35.9806	-35.9806	-69.0654	-69.0654	SAE			s_126220 [18602]	BASALT, ALKALINE [18602]	PLEISTOCENE-HOLOCENE [18602]				PLEISTOCENE-HOLOCENE [18602]					VOL					WR [18602]	46.88	1.67		16.46				9.42	10.95	6.99	0.15		0.94	3.25	0.36
Andean Southern Volcanic Arc Zones.csv	[18602]	7(11) SVZ rear-arc	Llancanelo Volcanic Field	Llancanelo	93	25	C Chile rear-arc	ANDEAN ARC / SOUTHERN ANDEAN VOLCANIC ZONE / ARGENTINA / LLANCANELO VOLCANIC FIELD	PAYENIA VOLCANIC PROVINCE, SOUTHERN MENDOZA, LAS OVEJAS	-35.9499	-35.9499	-69.054	-69.054	SAE			s_123939 [18602]	BASALT, ALKALINE [18602]	PLEISTOCENE-HOLOCENE [18602]				PLEISTOCENE-HOLOCENE [18602]					VOL					WR [18602]	46.874	1.578		16.234				9.33	11.433	7.448	0.153		0.975	3.11	0.392
Andean Southern Volcanic Arc Zones.csv	[18602]	7(11) SVZ rear-arc	Llancanelo Volcanic Field	Llancanelo	93	25	C Chile rear-arc	ANDEAN ARC / SOUTHERN ANDEAN VOLCANIC ZONE / ARGENTINA / LLANCANELO VOLCANIC FIELD	PAYENIA VOLCANIC PROVINCE, SOUTHERN MENDOZA, S OF CARAPACHO	-35.8442	-35.8442	-69.1453	-69.1453	SAE			s_123938 [18602]	BASALT, ALKALINE [18602]	PLEISTOCENE-HOLOCENE [18602]				PLEISTOCENE-HOLOCENE [18602]					VOL					WR [18602]	46.817	1.792		15.78				10.68	10.702	7.366	0.154		0.681	3.33	0.328
Andean Southern Volcanic Arc Zones.csv	[18602]	7(11) SVZ rear-arc	Llancanelo Volcanic Field	Llancanelo	93	25	C Chile rear-arc	ANDEAN ARC / SOUTHERN ANDEAN VOLCANIC ZONE / ARGENTINA / LLANCANELO VOLCANIC FIELD	PAYENIA VOLCANIC PROVINCE, SOUTHERN MENDOZA, SIERRA DEL PALAUCO	-35.9219	-35.9219	-69.4369	-69.4369	SAE			s_126195 [18602]	BASALT, ALKALINE [18602]	PLEISTOCENE-HOLOCENE [18602]				PLEISTOCENE-HOLOCENE [18602]					VOL					WR [18602]	49.05	1.58		16.77				9.68	9.69	6.92	0.15		0.89	3.5	0.33
Andean Southern Volcanic Arc Zones.csv	[18602]	7(11) SVZ rear-arc	Llancanelo Volcanic Field	Llancanelo	93	25	C Chile rear-arc	ANDEAN ARC / SOUTHERN ANDEAN VOLCANIC ZONE / ARGENTINA / LLANCANELO VOLCANIC FIELD	PAYENIA VOLCANIC PROVINCE, SOUTHERN MENDOZA, SIERRA DEL PALAUCO	-36.0255	-36.0255	-69.4052	-69.4052	SAE			s_126197 [18602]	BASALT, ALKALINE [18602]	PLEISTOCENE-HOLOCENE [18602]				PLEISTOCENE-HOLOCENE [18602]					VOL					WR [18602]	48.27	1.71		17.07				9.67	10.32	6.42	0.16		1.04	3.61	0.42
Andean Southern Volcanic Arc Zones.csv	[18961]	7(11) SVZ rear-arc	Llancanelo Volcanic Field	Llancanelo	93	25	C Chile rear-arc	ANDEAN ARC / SOUTHERN ANDEAN VOLCANIC ZONE / ARGENTINA / LLANCANELO VOLCANIC FIELD	PAYENIA VOLCANIC PROVINCE, SOUTHERN MENDOZA, CARAPACHO	-35.8359	-35.8359	-69.1455	-69.1455	SAE			s_VRE25 [18961]	BASALT [18961]	QUATERNARY [18961]				QUATERNARY [18961]					VOL					WR [18961]	47.99	1.568		16.8				11.71	9.49	6.666	0.1604		0.8364	3.19	0.3409
Andean Southern Volcanic Arc Zones.csv	[18961]	7(11) SVZ rear-arc	Llancanelo Volcanic Field	Llancanelo	93	25	C Chile rear-arc	ANDEAN ARC / SOUTHERN ANDEAN VOLCANIC ZONE / ARGENTINA / LLANCANELO VOLCANIC FIELD	PAYENIA VOLCANIC PROVINCE, SOUTHERN MENDOZA, CARAPACHO	-35.8287	-35.8287	-69.1513	-69.1513	SAE			s_CP3 [18961]	BASALT [18961]	QUATERNARY [18961]				QUATERNARY [18961]					VOL					WR [18961]	46.91	1.699		15.05				10.6	11	9.264	0.1635		1.366	2.983	0.6127
Andean Southern Volcanic Arc Zones.csv	[18961]	7(11) SVZ rear-arc	Llancanelo Volcanic Field	Llancanelo	93	25	C Chile rear-arc	ANDEAN ARC / SOUTHERN ANDEAN VOLCANIC ZONE / ARGENTINA / LLANCANELO VOLCANIC FIELD	PAYENIA VOLCANIC PROVINCE, SOUTHERN MENDOZA, MALACARA	-35.7687	-35.7687	-69.4822	-69.4822	SAE			s_MC3 [18961]	BASALT [18961]	QUATERNARY [18961]				QUATERNARY [18961]					VOL					WR [18961]	48.07	1.629		16.06				11.19	9.835	8.14	0.1603		0.8135	3.512	0.3217
Andean Southern Volcanic Arc Zones.csv	[18961]	7(11) SVZ rear-arc	Llancanelo Volcanic Field	Llancanelo	93	25	C Chile rear-arc	ANDEAN ARC / SOUTHERN ANDEAN VOLCANIC ZONE / ARGENTINA / LLANCANELO VOLCANIC FIELD	PAYENIA VOLCANIC PROVINCE, SOUTHERN MENDOZA, MALACARA	-35.7597	-35.7597	-69.4782	-69.4782	SAE			s_MC5 [18961]	BASALT [18961]	QUATERNARY [18961]				QUATERNARY [18961]					VOL					WR [18961]	47.01	1.522		15.35				10.8	10.29	10.2	0.161		0.9286	3.008	0.4008
Andean Southern Volcanic Arc Zones.csv	[18961]	7(11) SVZ rear-arc	Llancanelo Volcanic Field	Llancanelo	93	25	C Chile rear-arc	ANDEAN ARC / SOUTHERN ANDEAN VOLCANIC ZONE / ARGENTINA / LLANCANELO VOLCANIC FIELD	PAYENIA VOLCANIC PROVINCE, SOUTHERN MENDOZA, MALACARA	-35.7609	-35.7609	-69.4737	-69.4737	SAE			s_MC6 [18961]	BASALT [18961]	QUATERNARY [18961]				QUATERNARY [18961]					VOL					WR [18961]	48.17	1.775		16.24				11.2	9.664	7.699	0.1564		0.916	3.529	0.3998
Andean Southern Volcanic Arc Zones.csv	[18961]	7(11) SVZ rear-arc	Llancanelo Volcanic Field	Llancanelo	93	25	C Chile rear-arc	ANDEAN ARC / SOUTHERN ANDEAN VOLCANIC ZONE / ARGENTINA / LLANCANELO VOLCANIC FIELD	PAYENIA VOLCANIC PROVINCE, SOUTHERN MENDOZA	-35.64	-35.64	-69.0839	-69.0839	SAE			s_VRE11 [18961]	BASALT [18961]	QUATERNARY [18961]				QUATERNARY [18961]					VOL					WR [18961]	47.23	1.487		16.07				10.91	10.67	8.814	0.1605		1.176	3.277	0.4687
Andean Southern Volcanic Arc Zones.csv	[18961]	7(11) SVZ rear-arc	Llancanelo Volcanic Field	Llancanelo	93	25	C Chile rear-arc	ANDEAN ARC / SOUTHERN ANDEAN VOLCANIC ZONE / ARGENTINA / LLANCANELO VOLCANIC FIELD	PAYENIA VOLCANIC PROVINCE, SOUTHERN MENDOZA	-35.8487	-35.8487	-69.162	-69.162	SAE			s_VRE42 [18961]	BASALT [18961]	QUATERNARY [18961]				QUATERNARY [18961]					VOL					WR [18961]	49.45	1.575		17.64				11.07	9.45	7.106	0.1513		0.8385	3.172	0.358
Andean Southern Volcanic Arc Zones.csv	[18961]	7(11) SVZ rear-arc	Llancanelo Volcanic Field	Llancanelo	93	25	C Chile rear-arc	ANDEAN ARC / SOUTHERN ANDEAN VOLCANIC ZONE / ARGENTINA / LLANCANELO VOLCANIC FIELD	PAYENIA VOLCANIC PROVINCE, SOUTHERN MENDOZA	-35.7104	-35.7104	-69.4611	-69.4611	SAE			s_VRE44 [18961]	BASALT [18961]	QUATERNARY [18961]				QUATERNARY [18961]					VOL					WR [18961]	45.69	1.559		14.85				10.76	10.89	9.491	0.1578		1.013	3.327	0.466
Andean Southern Volcanic Arc Zones.csv	[18961]	7(11) SVZ rear-arc	Llancanelo Volcanic Field	Llancanelo	93	25	C Chile rear-arc	ANDEAN ARC / SOUTHERN ANDEAN VOLCANIC ZONE / ARGENTINA / LLANCANELO VOLCANIC FIELD	PAYENIA VOLCANIC PROVINCE, SOUTHERN MENDOZA	-35.6636	-35.6636	-69.524	-69.524	SAE			s_VRE45 [18961]	BASALT [18961]	QUATERNARY [18961]				QUATERNARY [18961]					VOL					WR [18961]	45.96	1.699		16.06				11.83	10.5	8.449	0.1651		0.8837	3.103	0.393
Andean Southern Volcanic Arc Zones.csv	[18602][19131]	7(11) SVZ rear-arc	Llancanelo Volcanic Field	Llancanelo	93	25	C Chile rear-arc	ANDEAN ARC / SOUTHERN ANDEAN VOLCANIC ZONE / ARGENTINA / LLANCANELO VOLCANIC FIELD	PAYENIA VOLCANIC PROVINCE, SOUTHERN MENDOZA, MALACAR	-35.7219	-35.7219	-69.4538	-69.4538	SAE			s_123905 [18602]	BASALT, ALKALINE [18602]	PLEISTOCENE-HOLOCENE [18602]				PLEISTOCENE-HOLOCENE [18602]					VOL					WR [18602]	46.775	1.527		15.015				10.02	9.966	10.004	0.159		0.99	3.26	0.42
Andean Southern Volcanic Arc Zones.csv	[18602][19131]	7(11) SVZ rear-arc	Llancanelo Volcanic Field	Llancanelo	93	25	C Chile rear-arc	ANDEAN ARC / SOUTHERN ANDEAN VOLCANIC ZONE / ARGENTINA / LLANCANELO VOLCANIC FIELD	PAYENIA VOLCANIC PROVINCE, SOUTHERN MENDOZA, PATAHULILOSO	-35.7885	-35.7885	-69.2697	-69.2697	SAE			s_123909 [18602]	BASALT, ALKALINE [18602]	PLEISTOCENE-HOLOCENE [18602]				PLEISTOCENE-HOLOCENE [18602]					VOL					WR [18602]	47.63	1.39		16.621				9.57	10.544	7.879	0.163		0.985	3.72	0.378
Andean Southern Volcanic Arc Zones.csv	[18602][19131]	7(11) SVZ rear-arc	Llancanelo Volcanic Field	Llancanelo	93	25	C Chile rear-arc	ANDEAN ARC / SOUTHERN ANDEAN VOLCANIC ZONE / ARGENTINA / LLANCANELO VOLCANIC FIELD	PAYENIA VOLCANIC PROVINCE, SOUTHERN MENDOZA, W OF CERRO CARAPACHO	-35.8292	-35.8292	-69.1751	-69.1751	SAE			s_123937 [18602]	BASALT, ALKALINE [18602]	PLEISTOCENE-HOLOCENE [18602]				PLEISTOCENE-HOLOCENE [18602]					VOL					WR [18602]	49.27	1.585		16.406				10.3	9.732	6.682	0.156		0.791	3.52	0.29
Andean Southern Volcanic Arc Zones.csv	[18602][19131]	7(11) SVZ rear-arc	Llancanelo Volcanic Field	Llancanelo	93	25	C Chile rear-arc	ANDEAN ARC / SOUTHERN ANDEAN VOLCANIC ZONE / ARGENTINA / LLANCANELO VOLCANIC FIELD	PAYENIA VOLCANIC PROVINCE, SOUTHERN MENDOZA, VOLCAN JARILLOSO	-35.6686	-35.6686	-69.4976	-69.4976	SAE			s_126192 [18602]	BASALT, ALKALINE [18602]	PLEISTOCENE-HOLOCENE [18602]				PLEISTOCENE-HOLOCENE [18602]					VOL					WR [18602]	46.11	1.84		16.11				9.91	10.54	8.07	0.16		1.14	3.47	0.5
Andean Southern Volcanic Arc Zones.csv	[18602][19131]	7(11) SVZ rear-arc	Llancanelo Volcanic Field	Llancanelo	93	25	C Chile rear-arc	ANDEAN ARC / SOUTHERN ANDEAN VOLCANIC ZONE / ARGENTINA / LLANCANELO VOLCANIC FIELD	PAYENIA VOLCANIC PROVINCE, SOUTHERN MENDOZA, LOMA DEL RANQUIL	-35.8037	-35.8037	-69.1773	-69.1773	SAE			s_126204 [18602]	BASALT, ALKALINE [18602]	PLEISTOCENE-HOLOCENE [18602]				PLEISTOCENE-HOLOCENE [18602]					VOL					WR [18602]	48.98	1.57		16.76				9.79	9.87	6.98	0.16		0.88	3.43	0.33
Andean Southern Volcanic Arc Zones.csv	[18602][19131]	7(11) SVZ rear-arc	Llancanelo Volcanic Field	Llancanelo	93	25	C Chile rear-arc	ANDEAN ARC / SOUTHERN ANDEAN VOLCANIC ZONE / ARGENTINA / LLANCANELO VOLCANIC FIELD	PAYENIA VOLCANIC PROVINCE, SOUTHERN MENDOZA, CERRO DEL ENOJO	-36.0742	-36.0742	-69.2269	-69.2269	SAE			s_126259 [18602]	BASALT, ALKALINE [18602]	PLEISTOCENE-HOLOCENE [18602]				PLEISTOCENE-HOLOCENE [18602]					VOL					WR [18602]	47.33	1.78		16.22				10.21	10.13	6.95	0.15		0.79	3.44	0.34
Andean Southern Volcanic Arc Zones.csv	[17913]	7(11) SVZ rear-arc	Llancanelo Volcanic Field	Llancanelo	93	25	C Chile rear-arc	ANDEAN ARC / SOUTHERN ANDEAN VOLCANIC ZONE / ARGENTINA	LLANCANELO FIELD	-35.2906	-35.2906	-68.2378	-68.2378	SAE			s_CL 313 [17913]	NOT GIVEN [17913]	Holocene									VOL			F		WR [17913]	47.899	1.51515		15.5051				11.6566	9.86869	8.61616	0.161616		0.818182	3.39394	0.353535
Andean Southern Volcanic Arc Zones.csv	[17913]	7(11) SVZ rear-arc	CERRO LOS LEONES	Llancanelo	93	25	C Chile rear-arc	ANDEAN ARC / SOUTHERN ANDEAN VOLCANIC ZONE / ARGENTINA	CERRO LOS LEONES	-35.496	-35.496	-69.4504	-69.4504	SAE			s_CL 354 [17913]	NOT GIVEN [17913]	Holocene,arc+backarc									VOL			F		WR [17913]	47.8744	1.6505		15.8247				12.3137	9.27278	7.88236	0.170051		0.770231	3.46104	0.30009
Andean Southern Volcanic Arc Zones.csv	[17913]	7(11) SVZ rear-arc		Llancanelo	93	25	C Chile rear-arc	ANDEAN ARC / SOUTHERN ANDEAN VOLCANIC ZONE / ARGENTINA	CERRO MALACARA	-35.7102	-35.7102	-69.4606	-69.4606	SAE			s_CL 346 [17913]	NOT GIVEN [17913]	Holocene									VOL			F		WR [17913]	46.3352	1.63152		15.5637				10.8274	9.97699	8.53334	0.158208		1.04813	3.26304	0.425184
Andean Southern Volcanic Arc Zones.csv	[17913]	7(11) SVZ rear-arc	CERRO MALACARA	Llancanelo	93	25	C Chile rear-arc	ANDEAN ARC / SOUTHERN ANDEAN VOLCANIC ZONE / ARGENTINA	EASTERN CERRO MALACARA	-35.7922	-35.7922	-69.4632	-69.4632	SAE			s_CL 350 [17913]	NOT GIVEN [17913]	Holocene									VOL			F		WR [17913]	46.8583	1.62606		16.2309				11.3428	10.1629	7.30736	0.168555		0.803115	3.4405	0.35694
Andean Southern Volcanic Arc Zones.csv	[18602]	7(11) SVZ rear-arc	South Mendoza Volcanic Field	Llancanelo	93	25	C Chile rear-arc	ANDEAN ARC / SOUTHERN ANDEAN VOLCANIC ZONE / ARGENTINA	PAYENIA VOLCANIC PROVINCE, SOUTHERN MENDOZA, SIERRA DEL PALAUCO	-36.0969	-36.0969	-69.4179	-69.4179	SAE			s_126198 [18602]	BASALT, ALKALINE [18602]	PLEISTOCENE-HOLOCENE [18602]				PLEISTOCENE-HOLOCENE [18602]					VOL					WR [18602]	46.09	1.79		16.32				9.61	10.75	7.72	0.16		1.23	3.19	0.49
Andean Southern Volcanic Arc Zones.csv	[18602]	7(11) SVZ rear-arc	South Mendoza Volcanic Field	Llancanelo	93	25	C Chile rear-arc	ANDEAN ARC / SOUTHERN ANDEAN VOLCANIC ZONE / ARGENTINA	PAYENIA VOLCANIC PROVINCE, SOUTHERN MENDOZA, RETROARC, CERRO ALTO, FRACTURE FLOW	-35.4635	-35.4635	-69.8501	-69.8501	SAE			s_126202 [18602]	BASALT, ALKALINE [18602]	PLEISTOCENE-HOLOCENE [18602]				PLEISTOCENE-HOLOCENE [18602]					VOL					WR [18602]	48.01	1.28		17.1				8.66	10.37	7.11	0.17		1.49	3.54	0.52
Andean Southern Volcanic Arc Zones.csv	[20645]	7(11) SVZ rear-arc	Payun Matru Volcanic Field	Payun Matru	94	25	C Chile rear-arc	ANDEAN ARC / SOUTHERN ANDEAN VOLCANIC ZONE / ARGENTINA / PAYUN MATRU VOLCANIC FIELD	SOUTHERN MENDOZA, SANTA MARIA VOLCANO, CINDER CONE	-36.2674	-36.2674	-69.308	-69.308	SAE	1635	1635	s_SM4 [20645]	BASALT [20645]	QUATERNARY [20645]				QUATERNARY [20645]				PORPHYRITIC [20645]	VOL					WR [20645]	49.03	1.81		16.95				9.4	9.01	6.53	0.15		1.48	3.89	0.44
Andean Southern Volcanic Arc Zones.csv	[20645]	7(11) SVZ rear-arc	Payun Matru Volcanic Field	Payun Matru	94	25	C Chile rear-arc	ANDEAN ARC / SOUTHERN ANDEAN VOLCANIC ZONE / ARGENTINA / PAYUN MATRU VOLCANIC FIELD	SOUTHERN MENDOZA, SANTA MARIA VOLCANO, CINDER CONE	-36.2732	-36.2732	-69.3114	-69.3114	SAE	1664	1664	s_SM6 [20645]	BASALT [20645]	QUATERNARY [20645]				QUATERNARY [20645]				PORPHYRITIC [20645]	VOL					WR [20645]	48.91	1.8		16.98				9.47	8.91	6.48	0.15		1.52	3.95	0.49
Andean Southern Volcanic Arc Zones.csv	[20645]	7(11) SVZ rear-arc	Payun Matru Volcanic Field	Payun Matru	94	25	C Chile rear-arc	ANDEAN ARC / SOUTHERN ANDEAN VOLCANIC ZONE / ARGENTINA / PAYUN MATRU VOLCANIC FIELD	SOUTHERN MENDOZA, SANTA MARIA VOLCANO, CINDER CONE	-36.2802	-36.2802	-69.3049	-69.3049	SAE	1660	1660	s_SM7 [20645]	BASALT [20645]	QUATERNARY [20645]				QUATERNARY [20645]				PORPHYRITIC [20645]	VOL					WR [20645]	48.17	1.87		17.05				9.7	9.29	6.65	0.15		1.42	3.87	0.49
Andean Southern Volcanic Arc Zones.csv	[20645]	7(11) SVZ rear-arc	Payun Matru Volcanic Field	Payun Matru	94	25	C Chile rear-arc	ANDEAN ARC / SOUTHERN ANDEAN VOLCANIC ZONE / ARGENTINA / PAYUN MATRU VOLCANIC FIELD	SOUTHERN MENDOZA, SANTA MARIA VOLCANO, CINDER CONE	-36.2966	-36.2966	-69.332	-69.332	SAE	1793	1793	s_SM9 [20645]	BASALT [20645]	QUATERNARY [20645]				QUATERNARY [20645]				PORPHYRITIC [20645]	VOL					WR [20645]	48.39	1.83		17.45				9.39	9.91	6.63	0.14		1.19	3.33	0.42
Andean Southern Volcanic Arc Zones.csv	[20645]	7(11) SVZ rear-arc	Payun Matru Volcanic Field	Payun Matru	94	25	C Chile rear-arc	ANDEAN ARC / SOUTHERN ANDEAN VOLCANIC ZONE / ARGENTINA / PAYUN MATRU VOLCANIC FIELD	SOUTHERN MENDOZA, SANTA MARIA VOLCANO, CINDER CONE	-36.2814	-36.2814	-69.3296	-69.3296	SAE	1723	1723	s_SM10 [20645]	BASALT [20645]	QUATERNARY [20645]				QUATERNARY [20645]				PORPHYRITIC [20645]	VOL					WR [20645]	49.05	1.8		16.84				9.47	8.92	6.67	0.15		1.47	3.87	0.46
Andean Southern Volcanic Arc Zones.csv	[20645]	7(11) SVZ rear-arc	Payun Matru Volcanic Field	Payun Matru	94	25	C Chile rear-arc	ANDEAN ARC / SOUTHERN ANDEAN VOLCANIC ZONE / ARGENTINA / PAYUN MATRU VOLCANIC FIELD	SOUTHERN MENDOZA, SANTA MARIA VOLCANO, CINDER CONE	-36.3032	-36.3032	-69.3165	-69.3165	SAE	1848	1848	s_SM12 [20645]	BASALT [20645]	QUATERNARY [20645]				QUATERNARY [20645]				PORPHYRITIC [20645]	VOL					WR [20645]	49.41	1.91		17.44				9.69	8.48	6.23	0.15		1.43	3.36	0.44
Andean Southern Volcanic Arc Zones.csv	[20645]	7(11) SVZ rear-arc	Payun Matru Volcanic Field	Payun Matru	94	25	C Chile rear-arc	ANDEAN ARC / SOUTHERN ANDEAN VOLCANIC ZONE / ARGENTINA / PAYUN MATRU VOLCANIC FIELD	SOUTHERN MENDOZA, SANTA MARIA VOLCANO, CINDER CONE	-36.2948	-36.2948	-69.3186	-69.3186	SAE	1774	1774	s_SM13 [20645]	BASALT [20645]	QUATERNARY [20645]				QUATERNARY [20645]				PORPHYRITIC [20645]	VOL					WR [20645]	48.54	1.91		17.13				9.69	9.22	6.52	0.15		1.45	3.61	0.43
Andean Southern Volcanic Arc Zones.csv	[20645]	7(11) SVZ rear-arc	Payun Matru Volcanic Field	Payun Matru	94	25	C Chile rear-arc	ANDEAN ARC / SOUTHERN ANDEAN VOLCANIC ZONE / ARGENTINA / PAYUN MATRU VOLCANIC FIELD	SOUTHERN MENDOZA, SANTA MARIA VOLCANO, CINDER CONE	-36.2002	-36.2002	-69.2145	-69.2145	SAE	1534	1534	s_SMT3 [20645]	BASALT [20645]	QUATERNARY [20645]				QUATERNARY [20645]				PORPHYRITIC [20645]	VOL					WR [20645]	48.36	1.81		16.36				9.82	8.89	6.43	0.16		1.51	3.82	0.47
Andean Southern Volcanic Arc Zones.csv	[20645]	7(11) SVZ rear-arc	Payun Matru Volcanic Field	Payun Matru	94	25	C Chile rear-arc	ANDEAN ARC / SOUTHERN ANDEAN VOLCANIC ZONE / ARGENTINA / PAYUN MATRU VOLCANIC FIELD	SOUTHERN MENDOZA, SANTA MARIA VOLCANO, CINDER CONE	-36.1981	-36.1981	-69.2186	-69.2186	SAE	1517	1517	s_SMT4 [20645]	BASALT [20645]	QUATERNARY [20645]				QUATERNARY [20645]				PORPHYRITIC [20645]	VOL					WR [20645]	48.74	1.85		17.03				9.8	9.12	6.53	0.16		1.56	4.04	0.49
Andean Southern Volcanic Arc Zones.csv	[20645]	7(11) SVZ rear-arc	Payun Matru Volcanic Field	Payun Matru	94	25	C Chile rear-arc	ANDEAN ARC / SOUTHERN ANDEAN VOLCANIC ZONE / ARGENTINA / PAYUN MATRU VOLCANIC FIELD	SOUTHERN MENDOZA, SANTA MARIA VOLCANO, CINDER CONE	-36.306	-36.306	-69.3185	-69.3185	SAE	1811	1811	s_VRE51 [20645]	BASALT [20645]	QUATERNARY [20645]				QUATERNARY [20645]				PORPHYRITIC [20645]	VOL					WR [20645]	48.03	1.81		16.93				9.38	8.97	6.17	0.15		1.49	3.58	0.52
Andean Southern Volcanic Arc Zones.csv	[20645]	7(11) SVZ rear-arc	Payun Matru Volcanic Field	Payun Matru	94	25	C Chile rear-arc	ANDEAN ARC / SOUTHERN ANDEAN VOLCANIC ZONE / ARGENTINA / PAYUN MATRU VOLCANIC FIELD	SOUTHERN MENDOZA, SANTA MARIA VOLCANO, CINDER CONE	-36.306	-36.306	-69.3185	-69.3185	SAE	1811	1811	s_VRE52 [20645]	BASALT [20645]	QUATERNARY [20645]				QUATERNARY [20645]				PORPHYRITIC [20645]	VOL					WR [20645]	48.14	1.77		16.84				9.38	8.97	6.17	0.16		1.46	3.65	0.47
Andean Southern Volcanic Arc Zones.csv	[13901]	7(11) SVZ rear-arc	Payun Matru Volcanic Field	Payun Matru	94	25	C Chile rear-arc	ANDEAN ARC / SOUTHERN ANDEAN VOLCANIC ZONE / ARGENTINA / PAYUN MATRU VOLCANIC FIELD / PAMPAS ONDULADAS FLOW	PAYENIA VOLCANIC PROVINCE, SOUTHERN MENDOZA, PAMPAS ONDULADAS	-36.3939	-36.3939	-68.6413	-68.6413	SAE			s_PY16 [13901]	BASALT [13901]	Late Quaternary									VOL					WR [13901]	47.82	1.63		17.88		1.58	9.28		8.36	7.91	0.14		1.04	3.82	0.39
Andean Southern Volcanic Arc Zones.csv	[13901]	7(11) SVZ rear-arc	Payun Matru Volcanic Field	Payun Matru	94	25	C Chile rear-arc	ANDEAN ARC / SOUTHERN ANDEAN VOLCANIC ZONE / ARGENTINA / PAYUN MATRU VOLCANIC FIELD / PAMPAS ONDULADAS FLOW	PAYENIA VOLCANIC PROVINCE, SOUTHERN MENDOZA, PAMPAS ONDULADAS	-36.2919	-36.2919	-68.7628	-68.7628	SAE			s_PY20 [13901]	BASALT [13901]	Late Quaternary									VOL					WR [13901]	47.73	1.65		18.28		0.76	9.27		9.53	7.61	0.16		0.84	3.27	0.32
Andean Southern Volcanic Arc Zones.csv	[13901]	7(11) SVZ rear-arc	Payun Matru Volcanic Field	Payun Matru	94	25	C Chile rear-arc	ANDEAN ARC / SOUTHERN ANDEAN VOLCANIC ZONE / ARGENTINA / PAYUN MATRU VOLCANIC FIELD / PAMPAS ONDULADAS FLOW	PAYENIA VOLCANIC PROVINCE, SOUTHERN MENDOZA, PAMPAS ONDULADAS	-36.4597	-36.4597	-68.3886	-68.3886	SAE			s_PY23 [13901]	BASALT [13901]	Late Quaternary									VOL					WR [13901]	47.56	1.9		17.53		1.52	9.22		9.5	6.87	0.16		1.01	3.47	0.37
Andean Southern Volcanic Arc Zones.csv	[13901]	7(11) SVZ rear-arc	Payun Matru Volcanic Field	Payun Matru	94	25	C Chile rear-arc	ANDEAN ARC / SOUTHERN ANDEAN VOLCANIC ZONE / ARGENTINA / PAYUN MATRU VOLCANIC FIELD / PAMPAS ONDULADAS FLOW	PAYENIA VOLCANIC PROVINCE, SOUTHERN MENDOZA, PAMPAS ONDULADAS	-36.4721	-36.4721	-68.1894	-68.1894	SAE			s_PY24 [13901]	BASALT [13901]	Late Quaternary									VOL					WR [13901]	47.25	1.83		17.2		0.43	10.22		9.39	7.35	0.16		0.91	3.5	0.35
Andean Southern Volcanic Arc Zones.csv	[13901]	7(11) SVZ rear-arc	Payun Matru Volcanic Field	Payun Matru	94	25	C Chile rear-arc	ANDEAN ARC / SOUTHERN ANDEAN VOLCANIC ZONE / ARGENTINA / PAYUN MATRU VOLCANIC FIELD / PAMPAS ONDULADAS FLOW	PAYENIA VOLCANIC PROVINCE, SOUTHERN MENDOZA, PAMPAS ONDULADAS	-36.5541	-36.5541	-68.1754	-68.1754	SAE			s_PY25 [13901]	BASALT [13901]	Late Quaternary									VOL					WR [13901]	47.86	1.77		17.56		1.91	9.24		8.96	7.3	0.16		0.93	3.46	0.35
Andean Southern Volcanic Arc Zones.csv	[13901]	7(11) SVZ rear-arc	Payun Matru Volcanic Field	Payun Matru	94	25	C Chile rear-arc	ANDEAN ARC / SOUTHERN ANDEAN VOLCANIC ZONE / ARGENTINA / PAYUN MATRU VOLCANIC FIELD / PAMPAS ONDULADAS FLOW	PAYENIA VOLCANIC PROVINCE, SOUTHERN MENDOZA, PAMPAS ONDULADAS	-36.9702	-36.9702	-67.4913	-67.4913	SAE			s_PY34A [13901]	BASALT [13901]	Late Quaternary									VOL					WR [13901]	48.75	1.73		17.49		0.86	9.79		8.75	7.62	0.16		0.86	3.5	0.29
Andean Southern Volcanic Arc Zones.csv	[13901]	7(11) SVZ rear-arc	Payun Matru Volcanic Field	Payun Matru	94	25	C Chile rear-arc	ANDEAN ARC / SOUTHERN ANDEAN VOLCANIC ZONE / ARGENTINA / PAYUN MATRU VOLCANIC FIELD / PAMPAS ONDULADAS FLOW	PAYENIA VOLCANIC PROVINCE, SOUTHERN MENDOZA, PAMPAS ONDULADAS	-36.9702	-36.9702	-67.4913	-67.4913	SAE			s_PY34B [13901]	BASALT [13901]	Late Quaternary									VOL					WR [13901]	47.25	1.49		16.83		1.71	9.1		9.32	9.14	0.18		0.82	3.43	0.26
Andean Southern Volcanic Arc Zones.csv	[13901]	7(11) SVZ rear-arc	Payun Matru Volcanic Field	Payun Matru	94	25	C Chile rear-arc	ANDEAN ARC / SOUTHERN ANDEAN VOLCANIC ZONE / ARGENTINA / PAYUN MATRU VOLCANIC FIELD / PAMPAS ONDULADAS FLOW	PAYENIA VOLCANIC PROVINCE, SOUTHERN MENDOZA, PAMPAS ONDULADAS	-36.2764	-36.2764	-68.7088	-68.7088	SAE			s_SAL1 [13901]	BASALT [13901]	Late Quaternary									VOL					WR [13901]	48.86	1.85		16.48				10.09	9.78	6.96	0.17		1.28	3.74	0.44
Andean Southern Volcanic Arc Zones.csv	[13901]	7(11) SVZ rear-arc	Payun Matru Volcanic Field	Payun Matru	94	25	C Chile rear-arc	ANDEAN ARC / SOUTHERN ANDEAN VOLCANIC ZONE / ARGENTINA / PAYUN MATRU VOLCANIC FIELD / PAMPAS ONDULADAS FLOW	PAYENIA VOLCANIC PROVINCE, SOUTHERN MENDOZA, PAMPAS ONDULADAS	-36.2944	-36.2944	-68.7316	-68.7316	SAE			s_SAL4 [13901]	BASALT [13901]	Late Quaternary									VOL					WR [13901]	47.86	1.78		16.2				9.99	10.17	7.05	0.16		1.22	3.61	0.44
Andean Southern Volcanic Arc Zones.csv	[18070]	7(11) SVZ rear-arc	Payun Matru Volcanic Field	Payun Matru	94	25	C Chile rear-arc	ANDEAN ARC / SOUTHERN ANDEAN VOLCANIC ZONE / ARGENTINA / PAYUN MATRU VOLCANIC FIELD		-36.3024	-36.3024	-69.3314	-69.3314	SAE			s_PM 45 [18070]	BASALT [18070]	QUATERNARY [18070]				QUATERNARY [18070]					VOL			F		WR [18070]	49.04	1.864		16.92				9.64	9.11	6.44	0.155		1.49	3.72	0.49
Andean Southern Volcanic Arc Zones.csv	[18070]	7(11) SVZ rear-arc	Payun Matru Volcanic Field	Payun Matru	94	25	C Chile rear-arc	ANDEAN ARC / SOUTHERN ANDEAN VOLCANIC ZONE / ARGENTINA / PAYUN MATRU VOLCANIC FIELD		-36.3855	-36.3855	-69.3502	-69.3502	SAE			s_STA 16 [18070]	BASALT [18070]	QUATERNARY [18070]				QUATERNARY [18070]					VOL			F		WR [18070]	47.21	2.307		16.23				11.21	9.78	6.27	0.182		1.24	3.57	0.53
Andean Southern Volcanic Arc Zones.csv	[18070]	7(11) SVZ rear-arc	Payun Matru Volcanic Field	Payun Matru	94	25	C Chile rear-arc	ANDEAN ARC / SOUTHERN ANDEAN VOLCANIC ZONE / ARGENTINA / PAYUN MATRU VOLCANIC FIELD		-36.4298	-36.4298	-69.4289	-69.4289	SAE			s_PMC 137 [18070]	BASALT [18070]	QUATERNARY [18070]				QUATERNARY [18070]					VOL			F		WR [18070]	46.94	2.062		17.41				9.7	10.46	6.76	0.159		1.22	3.56	0.52
Andean Southern Volcanic Arc Zones.csv	[18070]	7(11) SVZ rear-arc	Payun Matru Volcanic Field	Payun Matru	94	25	C Chile rear-arc	ANDEAN ARC / SOUTHERN ANDEAN VOLCANIC ZONE / ARGENTINA / PAYUN MATRU VOLCANIC FIELD		-36.3237	-36.3237	-69.3004	-69.3004	SAE			s_STA 3 [18070]	BASALT [18070]	QUATERNARY [18070]				QUATERNARY [18070]					VOL			F		WR [18070]	47.18	2.085		16.45				10.62	11.05	7.35	0.164		0.89	3.22	0.35
Andean Southern Volcanic Arc Zones.csv	[18070]	7(11) SVZ rear-arc	Payun Matru Volcanic Field	Payun Matru	94	25	C Chile rear-arc	ANDEAN ARC / SOUTHERN ANDEAN VOLCANIC ZONE / ARGENTINA / PAYUN MATRU VOLCANIC FIELD		-36.3346	-36.3346	-69.3245	-69.3245	SAE			s_STA 8 [18070]	BASALT [18070]	QUATERNARY [18070]				QUATERNARY [18070]					VOL			F		WR [18070]	47.22	1.774		17.31				10.21	11.06	6.59	0.17		1.06	3.37	0.43
Andean Southern Volcanic Arc Zones.csv	[18602]	7(11) SVZ rear-arc	Payun Matru Volcanic Field	Payun Matru	94	25	C Chile rear-arc	ANDEAN ARC / SOUTHERN ANDEAN VOLCANIC ZONE / ARGENTINA / PAYUN MATRU VOLCANIC FIELD	PAYENIA VOLCANIC PROVINCE, SOUTHERN MENDOZA	-36.2751	-36.2751	-69.6171	-69.6171	SAE			s_123918 [18602]	BASALT, ALKALINE [18602]	PLEISTOCENE-HOLOCENE [18602]				PLEISTOCENE-HOLOCENE [18602]					VOL					WR [18602]	47.25	1.924		17.039				10.36	10.536	7.233	0.157		0.964	3.35	0.352
Andean Southern Volcanic Arc Zones.csv	[18602]	7(11) SVZ rear-arc	Payun Matru Volcanic Field	Payun Matru	94	25	C Chile rear-arc	ANDEAN ARC / SOUTHERN ANDEAN VOLCANIC ZONE / ARGENTINA / PAYUN MATRU VOLCANIC FIELD	PAYENIA VOLCANIC PROVINCE, SOUTHERN MENDOZA	-36.2771	-36.2771	-69.6229	-69.6229	SAE			s_123919 [18602]	BASALT, ALKALINE [18602]	PLEISTOCENE-HOLOCENE [18602]				PLEISTOCENE-HOLOCENE [18602]					VOL					WR [18602]	46.388	1.847		15.944				10.76	10.391	8.409	0.16		0.81	3.14	0.332
Andean Southern Volcanic Arc Zones.csv	[18602]	7(11) SVZ rear-arc	Payun Matru Volcanic Field	Payun Matru	94	25	C Chile rear-arc	ANDEAN ARC / SOUTHERN ANDEAN VOLCANIC ZONE / ARGENTINA / PAYUN MATRU VOLCANIC FIELD	PAYENIA VOLCANIC PROVINCE, SOUTHERN MENDOZA	-36.4323	-36.4323	-69.6457	-69.6457	SAE			s_126282 [18602]	BASALT, ALKALINE [18602]	PLEISTOCENE-HOLOCENE [18602]				PLEISTOCENE-HOLOCENE [18602]					VOL					WR [18602]	46.87	2.28		17.28				10.06	10.53	6.02	0.15		1.17	3.6	0.49
Andean Southern Volcanic Arc Zones.csv	[18602]	7(11) SVZ rear-arc	Payun Matru Volcanic Field	Payun Matru	94	25	C Chile rear-arc	ANDEAN ARC / SOUTHERN ANDEAN VOLCANIC ZONE / ARGENTINA / PAYUN MATRU VOLCANIC FIELD	PAYENIA VOLCANIC PROVINCE, SOUTHERN MENDOZA	-36.4186	-36.4186	-69.6619	-69.6619	SAE			s_126288 [18602]	BASALT, ALKALINE [18602]	PLEISTOCENE-HOLOCENE [18602]				PLEISTOCENE-HOLOCENE [18602]					VOL					WR [18602]	46.4	2.12		16.57				10.46	10.68	7.02	0.16		0.91	3.18	0.41
Andean Southern Volcanic Arc Zones.csv	[18602]	7(11) SVZ rear-arc	Payun Matru Volcanic Field	Payun Matru	94	25	C Chile rear-arc	ANDEAN ARC / SOUTHERN ANDEAN VOLCANIC ZONE / ARGENTINA / PAYUN MATRU VOLCANIC FIELD	PAYENIA VOLCANIC PROVINCE, SOUTHERN MENDOZA	-36.374	-36.374	-69.4531	-69.4531	SAE			s_123920 [18602]	BASALT, ALKALINE [18602]	PLEISTOCENE-HOLOCENE [18602]				PLEISTOCENE-HOLOCENE [18602]					VOL					WR [18602]	47.385	1.914		17.219				10	10.39	7.051	0.155		1.223	3.39	0.444
Andean Southern Volcanic Arc Zones.csv	[18602]	7(11) SVZ rear-arc	Payun Matru Volcanic Field	Payun Matru	94	25	C Chile rear-arc	ANDEAN ARC / SOUTHERN ANDEAN VOLCANIC ZONE / ARGENTINA / PAYUN MATRU VOLCANIC FIELD	PAYENIA VOLCANIC PROVINCE, SOUTHERN MENDOZA	-36.3786	-36.3786	-69.4378	-69.4378	SAE			s_123921 [18602]	BASALT, ALKALINE [18602]	PLEISTOCENE-HOLOCENE [18602]				PLEISTOCENE-HOLOCENE [18602]					VOL					WR [18602]	48.983	1.796		15.866				10.26	8.624	7.715	0.154		0.851	3.21	0.409
Andean Southern Volcanic Arc Zones.csv	[18602]	7(11) SVZ rear-arc	Payun Matru Volcanic Field	Payun Matru	94	25	C Chile rear-arc	ANDEAN ARC / SOUTHERN ANDEAN VOLCANIC ZONE / ARGENTINA / PAYUN MATRU VOLCANIC FIELD	PAYENIA VOLCANIC PROVINCE, SOUTHERN MENDOZA	-36.456	-36.456	-69.3849	-69.3849	SAE			s_123923 [18602]	BASALT, ALKALINE [18602]	PLEISTOCENE-HOLOCENE [18602]				PLEISTOCENE-HOLOCENE [18602]					VOL					WR [18602]	48.68	1.721		16.696				9.28	9.5	6.426	0.162		1.526	3.61	0.505
Andean Southern Volcanic Arc Zones.csv	[18602]	7(11) SVZ rear-arc	Payun Matru Volcanic Field	Payun Matru	94	25	C Chile rear-arc	ANDEAN ARC / SOUTHERN ANDEAN VOLCANIC ZONE / ARGENTINA / PAYUN MATRU VOLCANIC FIELD	PAYENIA VOLCANIC PROVINCE, SOUTHERN MENDOZA, EL MOLLAR	-36.4573	-36.4573	-69.3814	-69.3814	SAE			s_123924 [18602]	BASALT, ALKALINE [18602]	PLEISTOCENE-HOLOCENE [18602]				PLEISTOCENE-HOLOCENE [18602]					VOL					WR [18602]	47.386	2.169		17.109				10.14	10.351	6.09	0.156		1.355	3.74	0.418
Andean Southern Volcanic Arc Zones.csv	[18602]	7(11) SVZ rear-arc	Payun Matru Volcanic Field	Payun Matru	94	25	C Chile rear-arc	ANDEAN ARC / SOUTHERN ANDEAN VOLCANIC ZONE / ARGENTINA / PAYUN MATRU VOLCANIC FIELD	PAYENIA VOLCANIC PROVINCE, SOUTHERN MENDOZA, FLOW W OF CERRO LOS CABALLOS	-36.407	-36.407	-69.3352	-69.3352	SAE			s_123927 [18602]	BASALT, ALKALINE [18602]	PLEISTOCENE-HOLOCENE [18602]				PLEISTOCENE-HOLOCENE [18602]					VOL					WR [18602]	47.355	1.84		17.171				10.02	10.766	6.197	0.16		1.105	3.69	0.427
Andean Southern Volcanic Arc Zones.csv	[18602]	7(11) SVZ rear-arc	Payun Matru Volcanic Field	Payun Matru	94	25	C Chile rear-arc	ANDEAN ARC / SOUTHERN ANDEAN VOLCANIC ZONE / ARGENTINA / PAYUN MATRU VOLCANIC FIELD	PAYENIA VOLCANIC PROVINCE, SOUTHERN MENDOZA, S OF COEHUE-CO	-36.3018	-36.3018	-69.4133	-69.4133	SAE			s_123928 [18602]	BASALT, ALKALINE [18602]	PLEISTOCENE-HOLOCENE [18602]				PLEISTOCENE-HOLOCENE [18602]					VOL					WR [18602]	46.968	2.212		17.319				10.11	9.867	6.399	0.155		1.398	3.76	0.563
Andean Southern Volcanic Arc Zones.csv	[18602]	7(11) SVZ rear-arc	Payun Matru Volcanic Field	Payun Matru	94	25	C Chile rear-arc	ANDEAN ARC / SOUTHERN ANDEAN VOLCANIC ZONE / ARGENTINA / PAYUN MATRU VOLCANIC FIELD	PAYENIA VOLCANIC PROVINCE, SOUTHERN MENDOZA	-36.3191	-36.3191	-69.3745	-69.3745	SAE			s_123930 [18602]	BASALT, ALKALINE [18602]	PLEISTOCENE-HOLOCENE [18602]				PLEISTOCENE-HOLOCENE [18602]					VOL					WR [18602]	47.93	2.223		16.793				10.81	10.117	6.013	0.166		1.084	3.97	0.446
Andean Southern Volcanic Arc Zones.csv	[18602]	7(11) SVZ rear-arc	Payun Matru Volcanic Field	Payun Matru	94	25	C Chile rear-arc	ANDEAN ARC / SOUTHERN ANDEAN VOLCANIC ZONE / ARGENTINA / PAYUN MATRU VOLCANIC FIELD	PAYENIA VOLCANIC PROVINCE, SOUTHERN MENDOZA	-36.3748	-36.3748	-69.4023	-69.4023	SAE			s_123935 [18602]	BASALT, ALKALINE [18602]	PLEISTOCENE-HOLOCENE [18602]				PLEISTOCENE-HOLOCENE [18602]					VOL					WR [18602]	47.093	2.203		17.461				10.08	10.077	6.417	0.156		1.382	3.84	0.572
Andean Southern Volcanic Arc Zones.csv	[18602]	7(11) SVZ rear-arc	Payun Matru Volcanic Field	Payun Matru	94	25	C Chile rear-arc	ANDEAN ARC / SOUTHERN ANDEAN VOLCANIC ZONE / ARGENTINA / PAYUN MATRU VOLCANIC FIELD	PAYENIA VOLCANIC PROVINCE, SOUTHERN MENDOZA, S OF VOLCAN HERRADURA	-36.3932	-36.3932	-69.392	-69.392	SAE			s_123936 [18602]	BASALT, ALKALINE [18602]	PLEISTOCENE-HOLOCENE [18602]				PLEISTOCENE-HOLOCENE [18602]					VOL					WR [18602]	46.967	2.016		16.248				10.3	10.091	8.188	0.158		1.219	3.46	0.39
Andean Southern Volcanic Arc Zones.csv	[18602]	7(11) SVZ rear-arc	Payun Matru Volcanic Field	Payun Matru	94	25	C Chile rear-arc	ANDEAN ARC / SOUTHERN ANDEAN VOLCANIC ZONE / ARGENTINA / PAYUN MATRU VOLCANIC FIELD	PAYENIA VOLCANIC PROVINCE, SOUTHERN MENDOZA	-36.3803	-36.3803	-69.4033	-69.4033	SAE			s_126245 [18602]	BASALT, ALKALINE [18602]	PLEISTOCENE-HOLOCENE [18602]				PLEISTOCENE-HOLOCENE [18602]					VOL					WR [18602]	46.98	2.19		17.59				10.04	10.09	6.19	0.16		1.35	3.57	0.6
Andean Southern Volcanic Arc Zones.csv	[18602]	7(11) SVZ rear-arc	Payun Matru Volcanic Field	Payun Matru	94	25	C Chile rear-arc	ANDEAN ARC / SOUTHERN ANDEAN VOLCANIC ZONE / ARGENTINA / PAYUN MATRU VOLCANIC FIELD	PAYENIA VOLCANIC PROVINCE, SOUTHERN MENDOZA, BARREALES DE JOSE LUIS	-36.0764	-36.0764	-69.0669	-69.0669	SAE			s_126226 [18602]	BASALT, ALKALINE [18602]	PLEISTOCENE-HOLOCENE [18602]				PLEISTOCENE-HOLOCENE [18602]					VOL					WR [18602]	49.06	1.78		16.64				9.65	9.52	6.45	0.16		1.59	3.59	0.43
Andean Southern Volcanic Arc Zones.csv	[18602]	7(11) SVZ rear-arc	Payun Matru Volcanic Field	Payun Matru	94	25	C Chile rear-arc	ANDEAN ARC / SOUTHERN ANDEAN VOLCANIC ZONE / ARGENTINA / PAYUN MATRU VOLCANIC FIELD	PAYENIA VOLCANIC PROVINCE, SOUTHERN MENDOZA, CERRO SANTA MARIA	-36.301	-36.301	-69.3337	-69.3337	SAE			s_123931 [18602]	BASALT, ALKALINE [18602]	PLEISTOCENE-HOLOCENE [18602]				PLEISTOCENE-HOLOCENE [18602]					VOL					WR [18602]	49.059	1.767		16.909				9.71	8.86	6.546	0.154		1.466	4	0.441
Andean Southern Volcanic Arc Zones.csv	[18602]	7(11) SVZ rear-arc	Payun Matru Volcanic Field	Payun Matru	94	25	C Chile rear-arc	ANDEAN ARC / SOUTHERN ANDEAN VOLCANIC ZONE / ARGENTINA / PAYUN MATRU VOLCANIC FIELD	PAYENIA VOLCANIC PROVINCE, SOUTHERN MENDOZA, N OF PAYUN MATRU	-36.3081	-36.3081	-69.2966	-69.2966	SAE			s_123932 [18602]	BASALT, ALKALINE [18602]	PLEISTOCENE-HOLOCENE [18602]				PLEISTOCENE-HOLOCENE [18602]					VOL					WR [18602]	46.679	2.089		16.227				10.34	10.919	6.744	0.153		1.003	3.44	0.358
Andean Southern Volcanic Arc Zones.csv	[18602]	7(11) SVZ rear-arc	Payun Matru Volcanic Field	Payun Matru	94	25	C Chile rear-arc	ANDEAN ARC / SOUTHERN ANDEAN VOLCANIC ZONE / ARGENTINA / PAYUN MATRU VOLCANIC FIELD	PAYENIA VOLCANIC PROVINCE, SOUTHERN MENDOZA, ONDULADAS FLOW	-36.3732	-36.3732	-68.5763	-68.5763	SAE			s_123942 [18602]	BASALT, ALKALINE [18602]	PLEISTOCENE-HOLOCENE [18602]				PLEISTOCENE-HOLOCENE [18602]					VOL					WR [18602]	48.346	1.766		16.381				10.09	9.356	7.107	0.158		1.212	3.43	0.421
Andean Southern Volcanic Arc Zones.csv	[18602]	7(11) SVZ rear-arc	Payun Matru Volcanic Field	Payun Matru	94	25	C Chile rear-arc	ANDEAN ARC / SOUTHERN ANDEAN VOLCANIC ZONE / ARGENTINA / PAYUN MATRU VOLCANIC FIELD	PAYENIA VOLCANIC PROVINCE, SOUTHERN MENDOZA, LONCO VACA	-36.6768	-36.6768	-68.7054	-68.7054	SAE			s_123945 [18602]	BASALT, ALKALINE [18602]	PLEISTOCENE-HOLOCENE [18602]				PLEISTOCENE-HOLOCENE [18602]					VOL					WR [18602]	49.611	1.422		17.711				10.13	9.241	6.06	0.143		0.541	3.79	0.21
Andean Southern Volcanic Arc Zones.csv	[18602]	7(11) SVZ rear-arc	Payun Matru Volcanic Field	Payun Matru	94	25	C Chile rear-arc	ANDEAN ARC / SOUTHERN ANDEAN VOLCANIC ZONE / ARGENTINA / PAYUN MATRU VOLCANIC FIELD	PAYENIA VOLCANIC PROVINCE, SOUTHERN MENDOZA. MALA AGILLA	-36.7536	-36.7536	-68.8555	-68.8555	SAE			s_123947 [18602]	BASALT, ALKALINE [18602]	PLEISTOCENE-HOLOCENE [18602]				PLEISTOCENE-HOLOCENE [18602]					VOL					WR [18602]	46.7	1.812		16.114				10.27	9.813	8.578	0.157		1.233	3.15	0.45
Andean Southern Volcanic Arc Zones.csv	[20645]	7(11) SVZ rear-arc	Payun Matru Volcanic Field	Payun Matru	94	25	C Chile rear-arc	ANDEAN ARC / SOUTHERN ANDEAN VOLCANIC ZONE / ARGENTINA / PAYUN MATRU VOLCANIC FIELD	SOUTHERN MENDOZA, SANTA MARIA VOLCANO, CINDER CONE	-36.2674	-36.2674	-69.308	-69.308	SAE	1635	1635	s_SM4 [20645]	BASALT [20645]	QUATERNARY [20645]				QUATERNARY [20645]				PORPHYRITIC [20645]	VOL					WR [20645]	49.03	1.81		16.95				9.4	9.01	6.53	0.15		1.48	3.89	0.44
Andean Southern Volcanic Arc Zones.csv	[20645]	7(11) SVZ rear-arc	Payun Matru Volcanic Field	Payun Matru	94	25	C Chile rear-arc	ANDEAN ARC / SOUTHERN ANDEAN VOLCANIC ZONE / ARGENTINA / PAYUN MATRU VOLCANIC FIELD	SOUTHERN MENDOZA, SANTA MARIA VOLCANO, CINDER CONE	-36.2732	-36.2732	-69.3114	-69.3114	SAE	1664	1664	s_SM6 [20645]	BASALT [20645]	QUATERNARY [20645]				QUATERNARY [20645]				PORPHYRITIC [20645]	VOL					WR [20645]	48.91	1.8		16.98				9.47	8.91	6.48	0.15		1.52	3.95	0.49
Andean Southern Volcanic Arc Zones.csv	[20645]	7(11) SVZ rear-arc	Payun Matru Volcanic Field	Payun Matru	94	25	C Chile rear-arc	ANDEAN ARC / SOUTHERN ANDEAN VOLCANIC ZONE / ARGENTINA / PAYUN MATRU VOLCANIC FIELD	SOUTHERN MENDOZA, SANTA MARIA VOLCANO, CINDER CONE	-36.2802	-36.2802	-69.3049	-69.3049	SAE	1660	1660	s_SM7 [20645]	BASALT [20645]	QUATERNARY [20645]				QUATERNARY [20645]				PORPHYRITIC [20645]	VOL					WR [20645]	48.17	1.87		17.05				9.7	9.29	6.65	0.15		1.42	3.87	0.49
Andean Southern Volcanic Arc Zones.csv	[20645]	7(11) SVZ rear-arc	Payun Matru Volcanic Field	Payun Matru	94	25	C Chile rear-arc	ANDEAN ARC / SOUTHERN ANDEAN VOLCANIC ZONE / ARGENTINA / PAYUN MATRU VOLCANIC FIELD	SOUTHERN MENDOZA, SANTA MARIA VOLCANO, CINDER CONE	-36.2966	-36.2966	-69.332	-69.332	SAE	1793	1793	s_SM9 [20645]	BASALT [20645]	QUATERNARY [20645]				QUATERNARY [20645]				PORPHYRITIC [20645]	VOL					WR [20645]	48.39	1.83		17.45				9.39	9.91	6.63	0.14		1.19	3.33	0.42
Andean Southern Volcanic Arc Zones.csv	[20645]	7(11) SVZ rear-arc	Payun Matru Volcanic Field	Payun Matru	94	25	C Chile rear-arc	ANDEAN ARC / SOUTHERN ANDEAN VOLCANIC ZONE / ARGENTINA / PAYUN MATRU VOLCANIC FIELD	SOUTHERN MENDOZA, SANTA MARIA VOLCANO, CINDER CONE	-36.2814	-36.2814	-69.3296	-69.3296	SAE	1723	1723	s_SM10 [20645]	BASALT [20645]	QUATERNARY [20645]				QUATERNARY [20645]				PORPHYRITIC [20645]	VOL					WR [20645]	49.05	1.8		16.84				9.47	8.92	6.67	0.15		1.47	3.87	0.46
Andean Southern Volcanic Arc Zones.csv	[20645]	7(11) SVZ rear-arc	Payun Matru Volcanic Field	Payun Matru	94	25	C Chile rear-arc	ANDEAN ARC / SOUTHERN ANDEAN VOLCANIC ZONE / ARGENTINA / PAYUN MATRU VOLCANIC FIELD	SOUTHERN MENDOZA, SANTA MARIA VOLCANO, CINDER CONE	-36.3032	-36.3032	-69.3165	-69.3165	SAE	1848	1848	s_SM12 [20645]	BASALT [20645]	QUATERNARY [20645]				QUATERNARY [20645]				PORPHYRITIC [20645]	VOL					WR [20645]	49.41	1.91		17.44				9.69	8.48	6.23	0.15		1.43	3.36	0.44
Andean Southern Volcanic Arc Zones.csv	[20645]	7(11) SVZ rear-arc	Payun Matru Volcanic Field	Payun Matru	94	25	C Chile rear-arc	ANDEAN ARC / SOUTHERN ANDEAN VOLCANIC ZONE / ARGENTINA / PAYUN MATRU VOLCANIC FIELD	SOUTHERN MENDOZA, SANTA MARIA VOLCANO, CINDER CONE	-36.2948	-36.2948	-69.3186	-69.3186	SAE	1774	1774	s_SM13 [20645]	BASALT [20645]	QUATERNARY [20645]				QUATERNARY [20645]				PORPHYRITIC [20645]	VOL					WR [20645]	48.54	1.91		17.13				9.69	9.22	6.52	0.15		1.45	3.61	0.43
Andean Southern Volcanic Arc Zones.csv	[20645]	7(11) SVZ rear-arc	Payun Matru Volcanic Field	Payun Matru	94	25	C Chile rear-arc	ANDEAN ARC / SOUTHERN ANDEAN VOLCANIC ZONE / ARGENTINA / PAYUN MATRU VOLCANIC FIELD	SOUTHERN MENDOZA, SANTA MARIA VOLCANO, CINDER CONE	-36.2002	-36.2002	-69.2145	-69.2145	SAE	1534	1534	s_SMT3 [20645]	BASALT [20645]	QUATERNARY [20645]				QUATERNARY [20645]				PORPHYRITIC [20645]	VOL					WR [20645]	48.36	1.81		16.36				9.82	8.89	6.43	0.16		1.51	3.82	0.47
Andean Southern Volcanic Arc Zones.csv	[20645]	7(11) SVZ rear-arc	Payun Matru Volcanic Field	Payun Matru	94	25	C Chile rear-arc	ANDEAN ARC / SOUTHERN ANDEAN VOLCANIC ZONE / ARGENTINA / PAYUN MATRU VOLCANIC FIELD	SOUTHERN MENDOZA, SANTA MARIA VOLCANO, CINDER CONE	-36.1981	-36.1981	-69.2186	-69.2186	SAE	1517	1517	s_SMT4 [20645]	BASALT [20645]	QUATERNARY [20645]				QUATERNARY [20645]				PORPHYRITIC [20645]	VOL					WR [20645]	48.74	1.85		17.03				9.8	9.12	6.53	0.16		1.56	4.04	0.49
Andean Southern Volcanic Arc Zones.csv	[20645]	7(11) SVZ rear-arc	Payun Matru Volcanic Field	Payun Matru	94	25	C Chile rear-arc	ANDEAN ARC / SOUTHERN ANDEAN VOLCANIC ZONE / ARGENTINA / PAYUN MATRU VOLCANIC FIELD	SOUTHERN MENDOZA, SANTA MARIA VOLCANO, CINDER CONE	-36.306	-36.306	-69.3185	-69.3185	SAE	1811	1811	s_VRE51 [20645]	BASALT [20645]	QUATERNARY [20645]				QUATERNARY [20645]				PORPHYRITIC [20645]	VOL					WR [20645]	48.03	1.81		16.93				9.38	8.97	6.17	0.15		1.49	3.58	0.52
Andean Southern Volcanic Arc Zones.csv	[20645]	7(11) SVZ rear-arc	Payun Matru Volcanic Field	Payun Matru	94	25	C Chile rear-arc	ANDEAN ARC / SOUTHERN ANDEAN VOLCANIC ZONE / ARGENTINA / PAYUN MATRU VOLCANIC FIELD	SOUTHERN MENDOZA, SANTA MARIA VOLCANO, CINDER CONE	-36.306	-36.306	-69.3185	-69.3185	SAE	1811	1811	s_VRE52 [20645]	BASALT [20645]	QUATERNARY [20645]				QUATERNARY [20645]				PORPHYRITIC [20645]	VOL					WR [20645]	48.14	1.77		16.84				9.38	8.97	6.17	0.16		1.46	3.65	0.47
Andean Southern Volcanic Arc Zones.csv	[13901]	7(11) SVZ rear-arc	Payun Matru Volcanic Field	Payun Matru	94	25	C Chile rear-arc	ANDEAN ARC / SOUTHERN ANDEAN VOLCANIC ZONE / ARGENTINA / PAYUN MATRU VOLCANIC FIELD / PAMPAS ONDULADAS FLOW	PAYENIA VOLCANIC PROVINCE, SOUTHERN MENDOZA, PAMPAS ONDULADAS	-36.3939	-36.3939	-68.6413	-68.6413	SAE			s_PY16 [13901]	BASALT [13901]	Late Quaternary									VOL					WR [13901]	47.82	1.63		17.88		1.58	9.28		8.36	7.91	0.14		1.04	3.82	0.39
Andean Southern Volcanic Arc Zones.csv	[13901]	7(11) SVZ rear-arc	Payun Matru Volcanic Field	Payun Matru	94	25	C Chile rear-arc	ANDEAN ARC / SOUTHERN ANDEAN VOLCANIC ZONE / ARGENTINA / PAYUN MATRU VOLCANIC FIELD / PAMPAS ONDULADAS FLOW	PAYENIA VOLCANIC PROVINCE, SOUTHERN MENDOZA, PAMPAS ONDULADAS	-36.2919	-36.2919	-68.7628	-68.7628	SAE			s_PY20 [13901]	BASALT [13901]	Late Quaternary									VOL					WR [13901]	47.73	1.65		18.28		0.76	9.27		9.53	7.61	0.16		0.84	3.27	0.32
Andean Southern Volcanic Arc Zones.csv	[13901]	7(11) SVZ rear-arc	Payun Matru Volcanic Field	Payun Matru	94	25	C Chile rear-arc	ANDEAN ARC / SOUTHERN ANDEAN VOLCANIC ZONE / ARGENTINA / PAYUN MATRU VOLCANIC FIELD / PAMPAS ONDULADAS FLOW	PAYENIA VOLCANIC PROVINCE, SOUTHERN MENDOZA, PAMPAS ONDULADAS	-36.4597	-36.4597	-68.3886	-68.3886	SAE			s_PY23 [13901]	BASALT [13901]	Late Quaternary									VOL					WR [13901]	47.56	1.9		17.53		1.52	9.22		9.5	6.87	0.16		1.01	3.47	0.37
Andean Southern Volcanic Arc Zones.csv	[13901]	7(11) SVZ rear-arc	Payun Matru Volcanic Field	Payun Matru	94	25	C Chile rear-arc	ANDEAN ARC / SOUTHERN ANDEAN VOLCANIC ZONE / ARGENTINA / PAYUN MATRU VOLCANIC FIELD / PAMPAS ONDULADAS FLOW	PAYENIA VOLCANIC PROVINCE, SOUTHERN MENDOZA, PAMPAS ONDULADAS	-36.4721	-36.4721	-68.1894	-68.1894	SAE			s_PY24 [13901]	BASALT [13901]	Late Quaternary									VOL					WR [13901]	47.25	1.83		17.2		0.43	10.22		9.39	7.35	0.16		0.91	3.5	0.35
Andean Southern Volcanic Arc Zones.csv	[13901]	7(11) SVZ rear-arc	Payun Matru Volcanic Field	Payun Matru	94	25	C Chile rear-arc	ANDEAN ARC / SOUTHERN ANDEAN VOLCANIC ZONE / ARGENTINA / PAYUN MATRU VOLCANIC FIELD / PAMPAS ONDULADAS FLOW	PAYENIA VOLCANIC PROVINCE, SOUTHERN MENDOZA, PAMPAS ONDULADAS	-36.5541	-36.5541	-68.1754	-68.1754	SAE			s_PY25 [13901]	BASALT [13901]	Late Quaternary									VOL					WR [13901]	47.86	1.77		17.56		1.91	9.24		8.96	7.3	0.16		0.93	3.46	0.35
Andean Southern Volcanic Arc Zones.csv	[13901]	7(11) SVZ rear-arc	Payun Matru Volcanic Field	Payun Matru	94	25	C Chile rear-arc	ANDEAN ARC / SOUTHERN ANDEAN VOLCANIC ZONE / ARGENTINA / PAYUN MATRU VOLCANIC FIELD / PAMPAS ONDULADAS FLOW	PAYENIA VOLCANIC PROVINCE, SOUTHERN MENDOZA, PAMPAS ONDULADAS	-36.9702	-36.9702	-67.4913	-67.4913	SAE			s_PY34A [13901]	BASALT [13901]	Late Quaternary									VOL					WR [13901]	48.75	1.73		17.49		0.86	9.79		8.75	7.62	0.16		0.86	3.5	0.29
Andean Southern Volcanic Arc Zones.csv	[13901]	7(11) SVZ rear-arc	Payun Matru Volcanic Field	Payun Matru	94	25	C Chile rear-arc	ANDEAN ARC / SOUTHERN ANDEAN VOLCANIC ZONE / ARGENTINA / PAYUN MATRU VOLCANIC FIELD / PAMPAS ONDULADAS FLOW	PAYENIA VOLCANIC PROVINCE, SOUTHERN MENDOZA, PAMPAS ONDULADAS	-36.9702	-36.9702	-67.4913	-67.4913	SAE			s_PY34B [13901]	BASALT [13901]	Late Quaternary									VOL					WR [13901]	47.25	1.49		16.83		1.71	9.1		9.32	9.14	0.18		0.82	3.43	0.26
Andean Southern Volcanic Arc Zones.csv	[13901]	7(11) SVZ rear-arc	Payun Matru Volcanic Field	Payun Matru	94	25	C Chile rear-arc	ANDEAN ARC / SOUTHERN ANDEAN VOLCANIC ZONE / ARGENTINA / PAYUN MATRU VOLCANIC FIELD / PAMPAS ONDULADAS FLOW	PAYENIA VOLCANIC PROVINCE, SOUTHERN MENDOZA, PAMPAS ONDULADAS	-36.2764	-36.2764	-68.7088	-68.7088	SAE			s_SAL1 [13901]	BASALT [13901]	Late Quaternary									VOL					WR [13901]	48.86	1.85		16.48				10.09	9.78	6.96	0.17		1.28	3.74	0.44
Andean Southern Volcanic Arc Zones.csv	[13901]	7(11) SVZ rear-arc	Payun Matru Volcanic Field	Payun Matru	94	25	C Chile rear-arc	ANDEAN ARC / SOUTHERN ANDEAN VOLCANIC ZONE / ARGENTINA / PAYUN MATRU VOLCANIC FIELD / PAMPAS ONDULADAS FLOW	PAYENIA VOLCANIC PROVINCE, SOUTHERN MENDOZA, PAMPAS ONDULADAS	-36.2944	-36.2944	-68.7316	-68.7316	SAE			s_SAL4 [13901]	BASALT [13901]	Late Quaternary									VOL					WR [13901]	47.86	1.78		16.2				9.99	10.17	7.05	0.16		1.22	3.61	0.44
Andean Southern Volcanic Arc Zones.csv	[18070]	7(11) SVZ rear-arc	Payun Matru Volcanic Field	Payun Matru	94	25	C Chile rear-arc	ANDEAN ARC / SOUTHERN ANDEAN VOLCANIC ZONE / ARGENTINA / PAYUN MATRU VOLCANIC FIELD		-36.3024	-36.3024	-69.3314	-69.3314	SAE			s_PM 45 [18070]	BASALT [18070]	QUATERNARY [18070]				QUATERNARY [18070]					VOL			F		WR [18070]	49.04	1.864		16.92				9.64	9.11	6.44	0.155		1.49	3.72	0.49
Andean Southern Volcanic Arc Zones.csv	[18070]	7(11) SVZ rear-arc	Payun Matru Volcanic Field	Payun Matru	94	25	C Chile rear-arc	ANDEAN ARC / SOUTHERN ANDEAN VOLCANIC ZONE / ARGENTINA / PAYUN MATRU VOLCANIC FIELD		-36.3855	-36.3855	-69.3502	-69.3502	SAE			s_STA 16 [18070]	BASALT [18070]	QUATERNARY [18070]				QUATERNARY [18070]					VOL			F		WR [18070]	47.21	2.307		16.23				11.21	9.78	6.27	0.182		1.24	3.57	0.53
Andean Southern Volcanic Arc Zones.csv	[18070]	7(11) SVZ rear-arc	Payun Matru Volcanic Field	Payun Matru	94	25	C Chile rear-arc	ANDEAN ARC / SOUTHERN ANDEAN VOLCANIC ZONE / ARGENTINA / PAYUN MATRU VOLCANIC FIELD		-36.4298	-36.4298	-69.4289	-69.4289	SAE			s_PMC 137 [18070]	BASALT [18070]	QUATERNARY [18070]				QUATERNARY [18070]					VOL			F		WR [18070]	46.94	2.062		17.41				9.7	10.46	6.76	0.159		1.22	3.56	0.52
Andean Southern Volcanic Arc Zones.csv	[18070]	7(11) SVZ rear-arc	Payun Matru Volcanic Field	Payun Matru	94	25	C Chile rear-arc	ANDEAN ARC / SOUTHERN ANDEAN VOLCANIC ZONE / ARGENTINA / PAYUN MATRU VOLCANIC FIELD		-36.3237	-36.3237	-69.3004	-69.3004	SAE			s_STA 3 [18070]	BASALT [18070]	QUATERNARY [18070]				QUATERNARY [18070]					VOL			F		WR [18070]	47.18	2.085		16.45				10.62	11.05	7.35	0.164		0.89	3.22	0.35
Andean Southern Volcanic Arc Zones.csv	[18070]	7(11) SVZ rear-arc	Payun Matru Volcanic Field	Payun Matru	94	25	C Chile rear-arc	ANDEAN ARC / SOUTHERN ANDEAN VOLCANIC ZONE / ARGENTINA / PAYUN MATRU VOLCANIC FIELD		-36.3346	-36.3346	-69.3245	-69.3245	SAE			s_STA 8 [18070]	BASALT [18070]	QUATERNARY [18070]				QUATERNARY [18070]					VOL			F		WR [18070]	47.22	1.774		17.31				10.21	11.06	6.59	0.17		1.06	3.37	0.43
Andean Southern Volcanic Arc Zones.csv	[18602]	7(11) SVZ rear-arc	Payun Matru Volcanic Field	Payun Matru	94	25	C Chile rear-arc	ANDEAN ARC / SOUTHERN ANDEAN VOLCANIC ZONE / ARGENTINA / PAYUN MATRU VOLCANIC FIELD	PAYENIA VOLCANIC PROVINCE, SOUTHERN MENDOZA	-36.2751	-36.2751	-69.6171	-69.6171	SAE			s_123918 [18602]	BASALT, ALKALINE [18602]	PLEISTOCENE-HOLOCENE [18602]				PLEISTOCENE-HOLOCENE [18602]					VOL					WR [18602]	47.25	1.924		17.039				10.36	10.536	7.233	0.157		0.964	3.35	0.352
Andean Southern Volcanic Arc Zones.csv	[18602]	7(11) SVZ rear-arc	Payun Matru Volcanic Field	Payun Matru	94	25	C Chile rear-arc	ANDEAN ARC / SOUTHERN ANDEAN VOLCANIC ZONE / ARGENTINA / PAYUN MATRU VOLCANIC FIELD	PAYENIA VOLCANIC PROVINCE, SOUTHERN MENDOZA	-36.2771	-36.2771	-69.6229	-69.6229	SAE			s_123919 [18602]	BASALT, ALKALINE [18602]	PLEISTOCENE-HOLOCENE [18602]				PLEISTOCENE-HOLOCENE [18602]					VOL					WR [18602]	46.388	1.847		15.944				10.76	10.391	8.409	0.16		0.81	3.14	0.332
Andean Southern Volcanic Arc Zones.csv	[18602]	7(11) SVZ rear-arc	Payun Matru Volcanic Field	Payun Matru	94	25	C Chile rear-arc	ANDEAN ARC / SOUTHERN ANDEAN VOLCANIC ZONE / ARGENTINA / PAYUN MATRU VOLCANIC FIELD	PAYENIA VOLCANIC PROVINCE, SOUTHERN MENDOZA	-36.4323	-36.4323	-69.6457	-69.6457	SAE			s_126282 [18602]	BASALT, ALKALINE [18602]	PLEISTOCENE-HOLOCENE [18602]				PLEISTOCENE-HOLOCENE [18602]					VOL					WR [18602]	46.87	2.28		17.28				10.06	10.53	6.02	0.15		1.17	3.6	0.49
Andean Southern Volcanic Arc Zones.csv	[18602]	7(11) SVZ rear-arc	Payun Matru Volcanic Field	Payun Matru	94	25	C Chile rear-arc	ANDEAN ARC / SOUTHERN ANDEAN VOLCANIC ZONE / ARGENTINA / PAYUN MATRU VOLCANIC FIELD	PAYENIA VOLCANIC PROVINCE, SOUTHERN MENDOZA	-36.4186	-36.4186	-69.6619	-69.6619	SAE			s_126288 [18602]	BASALT, ALKALINE [18602]	PLEISTOCENE-HOLOCENE [18602]				PLEISTOCENE-HOLOCENE [18602]					VOL					WR [18602]	46.4	2.12		16.57				10.46	10.68	7.02	0.16		0.91	3.18	0.41
Andean Southern Volcanic Arc Zones.csv	[18602]	7(11) SVZ rear-arc	Payun Matru Volcanic Field	Payun Matru	94	25	C Chile rear-arc	ANDEAN ARC / SOUTHERN ANDEAN VOLCANIC ZONE / ARGENTINA / PAYUN MATRU VOLCANIC FIELD	PAYENIA VOLCANIC PROVINCE, SOUTHERN MENDOZA	-36.374	-36.374	-69.4531	-69.4531	SAE			s_123920 [18602]	BASALT, ALKALINE [18602]	PLEISTOCENE-HOLOCENE [18602]				PLEISTOCENE-HOLOCENE [18602]					VOL					WR [18602]	47.385	1.914		17.219				10	10.39	7.051	0.155		1.223	3.39	0.444
Andean Southern Volcanic Arc Zones.csv	[18602]	7(11) SVZ rear-arc	Payun Matru Volcanic Field	Payun Matru	94	25	C Chile rear-arc	ANDEAN ARC / SOUTHERN ANDEAN VOLCANIC ZONE / ARGENTINA / PAYUN MATRU VOLCANIC FIELD	PAYENIA VOLCANIC PROVINCE, SOUTHERN MENDOZA	-36.3786	-36.3786	-69.4378	-69.4378	SAE			s_123921 [18602]	BASALT, ALKALINE [18602]	PLEISTOCENE-HOLOCENE [18602]				PLEISTOCENE-HOLOCENE [18602]					VOL					WR [18602]	48.983	1.796		15.866				10.26	8.624	7.715	0.154		0.851	3.21	0.409
Andean Southern Volcanic Arc Zones.csv	[18602]	7(11) SVZ rear-arc	Payun Matru Volcanic Field	Payun Matru	94	25	C Chile rear-arc	ANDEAN ARC / SOUTHERN ANDEAN VOLCANIC ZONE / ARGENTINA / PAYUN MATRU VOLCANIC FIELD	PAYENIA VOLCANIC PROVINCE, SOUTHERN MENDOZA	-36.456	-36.456	-69.3849	-69.3849	SAE			s_123923 [18602]	BASALT, ALKALINE [18602]	PLEISTOCENE-HOLOCENE [18602]				PLEISTOCENE-HOLOCENE [18602]					VOL					WR [18602]	48.68	1.721		16.696				9.28	9.5	6.426	0.162		1.526	3.61	0.505
Andean Southern Volcanic Arc Zones.csv	[18602]	7(11) SVZ rear-arc	Payun Matru Volcanic Field	Payun Matru	94	25	C Chile rear-arc	ANDEAN ARC / SOUTHERN ANDEAN VOLCANIC ZONE / ARGENTINA / PAYUN MATRU VOLCANIC FIELD	PAYENIA VOLCANIC PROVINCE, SOUTHERN MENDOZA, EL MOLLAR	-36.4573	-36.4573	-69.3814	-69.3814	SAE			s_123924 [18602]	BASALT, ALKALINE [18602]	PLEISTOCENE-HOLOCENE [18602]				PLEISTOCENE-HOLOCENE [18602]					VOL					WR [18602]	47.386	2.169		17.109				10.14	10.351	6.09	0.156		1.355	3.74	0.418
Andean Southern Volcanic Arc Zones.csv	[18602]	7(11) SVZ rear-arc	Payun Matru Volcanic Field	Payun Matru	94	25	C Chile rear-arc	ANDEAN ARC / SOUTHERN ANDEAN VOLCANIC ZONE / ARGENTINA / PAYUN MATRU VOLCANIC FIELD	PAYENIA VOLCANIC PROVINCE, SOUTHERN MENDOZA, FLOW W OF CERRO LOS CABALLOS	-36.407	-36.407	-69.3352	-69.3352	SAE			s_123927 [18602]	BASALT, ALKALINE [18602]	PLEISTOCENE-HOLOCENE [18602]				PLEISTOCENE-HOLOCENE [18602]					VOL					WR [18602]	47.355	1.84		17.171				10.02	10.766	6.197	0.16		1.105	3.69	0.427
Andean Southern Volcanic Arc Zones.csv	[18602]	7(11) SVZ rear-arc	Payun Matru Volcanic Field	Payun Matru	94	25	C Chile rear-arc	ANDEAN ARC / SOUTHERN ANDEAN VOLCANIC ZONE / ARGENTINA / PAYUN MATRU VOLCANIC FIELD	PAYENIA VOLCANIC PROVINCE, SOUTHERN MENDOZA, S OF COEHUE-CO	-36.3018	-36.3018	-69.4133	-69.4133	SAE			s_123928 [18602]	BASALT, ALKALINE [18602]	PLEISTOCENE-HOLOCENE [18602]				PLEISTOCENE-HOLOCENE [18602]					VOL					WR [18602]	46.968	2.212		17.319				10.11	9.867	6.399	0.155		1.398	3.76	0.563
Andean Southern Volcanic Arc Zones.csv	[18602]	7(11) SVZ rear-arc	Payun Matru Volcanic Field	Payun Matru	94	25	C Chile rear-arc	ANDEAN ARC / SOUTHERN ANDEAN VOLCANIC ZONE / ARGENTINA / PAYUN MATRU VOLCANIC FIELD	PAYENIA VOLCANIC PROVINCE, SOUTHERN MENDOZA	-36.3191	-36.3191	-69.3745	-69.3745	SAE			s_123930 [18602]	BASALT, ALKALINE [18602]	PLEISTOCENE-HOLOCENE [18602]				PLEISTOCENE-HOLOCENE [18602]					VOL					WR [18602]	47.93	2.223		16.793				10.81	10.117	6.013	0.166		1.084	3.97	0.446
Andean Southern Volcanic Arc Zones.csv	[18602]	7(11) SVZ rear-arc	Payun Matru Volcanic Field	Payun Matru	94	25	C Chile rear-arc	ANDEAN ARC / SOUTHERN ANDEAN VOLCANIC ZONE / ARGENTINA / PAYUN MATRU VOLCANIC FIELD	PAYENIA VOLCANIC PROVINCE, SOUTHERN MENDOZA	-36.3748	-36.3748	-69.4023	-69.4023	SAE			s_123935 [18602]	BASALT, ALKALINE [18602]	PLEISTOCENE-HOLOCENE [18602]				PLEISTOCENE-HOLOCENE [18602]					VOL					WR [18602]	47.093	2.203		17.461				10.08	10.077	6.417	0.156		1.382	3.84	0.572
Andean Southern Volcanic Arc Zones.csv	[18602]	7(11) SVZ rear-arc	Payun Matru Volcanic Field	Payun Matru	94	25	C Chile rear-arc	ANDEAN ARC / SOUTHERN ANDEAN VOLCANIC ZONE / ARGENTINA / PAYUN MATRU VOLCANIC FIELD	PAYENIA VOLCANIC PROVINCE, SOUTHERN MENDOZA, S OF VOLCAN HERRADURA	-36.3932	-36.3932	-69.392	-69.392	SAE			s_123936 [18602]	BASALT, ALKALINE [18602]	PLEISTOCENE-HOLOCENE [18602]				PLEISTOCENE-HOLOCENE [18602]					VOL					WR [18602]	46.967	2.016		16.248				10.3	10.091	8.188	0.158		1.219	3.46	0.39
Andean Southern Volcanic Arc Zones.csv	[18602]	7(11) SVZ rear-arc	Payun Matru Volcanic Field	Payun Matru	94	25	C Chile rear-arc	ANDEAN ARC / SOUTHERN ANDEAN VOLCANIC ZONE / ARGENTINA / PAYUN MATRU VOLCANIC FIELD	PAYENIA VOLCANIC PROVINCE, SOUTHERN MENDOZA	-36.3803	-36.3803	-69.4033	-69.4033	SAE			s_126245 [18602]	BASALT, ALKALINE [18602]	PLEISTOCENE-HOLOCENE [18602]				PLEISTOCENE-HOLOCENE [18602]					VOL					WR [18602]	46.98	2.19		17.59				10.04	10.09	6.19	0.16		1.35	3.57	0.6
Andean Southern Volcanic Arc Zones.csv	[18602]	7(11) SVZ rear-arc	Payun Matru Volcanic Field	Payun Matru	94	25	C Chile rear-arc	ANDEAN ARC / SOUTHERN ANDEAN VOLCANIC ZONE / ARGENTINA / PAYUN MATRU VOLCANIC FIELD	PAYENIA VOLCANIC PROVINCE, SOUTHERN MENDOZA, BARREALES DE JOSE LUIS	-36.0764	-36.0764	-69.0669	-69.0669	SAE			s_126226 [18602]	BASALT, ALKALINE [18602]	PLEISTOCENE-HOLOCENE [18602]				PLEISTOCENE-HOLOCENE [18602]					VOL					WR [18602]	49.06	1.78		16.64				9.65	9.52	6.45	0.16		1.59	3.59	0.43
Andean Southern Volcanic Arc Zones.csv	[18602]	7(11) SVZ rear-arc	Payun Matru Volcanic Field	Payun Matru	94	25	C Chile rear-arc	ANDEAN ARC / SOUTHERN ANDEAN VOLCANIC ZONE / ARGENTINA / PAYUN MATRU VOLCANIC FIELD	PAYENIA VOLCANIC PROVINCE, SOUTHERN MENDOZA, CERRO SANTA MARIA	-36.301	-36.301	-69.3337	-69.3337	SAE			s_123931 [18602]	BASALT, ALKALINE [18602]	PLEISTOCENE-HOLOCENE [18602]				PLEISTOCENE-HOLOCENE [18602]					VOL					WR [18602]	49.059	1.767		16.909				9.71	8.86	6.546	0.154		1.466	4	0.441
Andean Southern Volcanic Arc Zones.csv	[18602]	7(11) SVZ rear-arc	Payun Matru Volcanic Field	Payun Matru	94	25	C Chile rear-arc	ANDEAN ARC / SOUTHERN ANDEAN VOLCANIC ZONE / ARGENTINA / PAYUN MATRU VOLCANIC FIELD	PAYENIA VOLCANIC PROVINCE, SOUTHERN MENDOZA, N OF PAYUN MATRU	-36.3081	-36.3081	-69.2966	-69.2966	SAE			s_123932 [18602]	BASALT, ALKALINE [18602]	PLEISTOCENE-HOLOCENE [18602]				PLEISTOCENE-HOLOCENE [18602]					VOL					WR [18602]	46.679	2.089		16.227				10.34	10.919	6.744	0.153		1.003	3.44	0.358
Andean Southern Volcanic Arc Zones.csv	[18602]	7(11) SVZ rear-arc	Payun Matru Volcanic Field	Payun Matru	94	25	C Chile rear-arc	ANDEAN ARC / SOUTHERN ANDEAN VOLCANIC ZONE / ARGENTINA / PAYUN MATRU VOLCANIC FIELD	PAYENIA VOLCANIC PROVINCE, SOUTHERN MENDOZA, ONDULADAS FLOW	-36.3732	-36.3732	-68.5763	-68.5763	SAE			s_123942 [18602]	BASALT, ALKALINE [18602]	PLEISTOCENE-HOLOCENE [18602]				PLEISTOCENE-HOLOCENE [18602]					VOL					WR [18602]	48.346	1.766		16.381				10.09	9.356	7.107	0.158		1.212	3.43	0.421
Andean Southern Volcanic Arc Zones.csv	[18602]	7(11) SVZ rear-arc	Payun Matru Volcanic Field	Payun Matru	94	25	C Chile rear-arc	ANDEAN ARC / SOUTHERN ANDEAN VOLCANIC ZONE / ARGENTINA / PAYUN MATRU VOLCANIC FIELD	PAYENIA VOLCANIC PROVINCE, SOUTHERN MENDOZA, LONCO VACA	-36.6768	-36.6768	-68.7054	-68.7054	SAE			s_123945 [18602]	BASALT, ALKALINE [18602]	PLEISTOCENE-HOLOCENE [18602]				PLEISTOCENE-HOLOCENE [18602]					VOL					WR [18602]	49.611	1.422		17.711				10.13	9.241	6.06	0.143		0.541	3.79	0.21
Andean Southern Volcanic Arc Zones.csv	[18602]	7(11) SVZ rear-arc	Payun Matru Volcanic Field	Payun Matru	94	25	C Chile rear-arc	ANDEAN ARC / SOUTHERN ANDEAN VOLCANIC ZONE / ARGENTINA / PAYUN MATRU VOLCANIC FIELD	PAYENIA VOLCANIC PROVINCE, SOUTHERN MENDOZA. MALA AGILLA	-36.7536	-36.7536	-68.8555	-68.8555	SAE			s_123947 [18602]	BASALT, ALKALINE [18602]	PLEISTOCENE-HOLOCENE [18602]				PLEISTOCENE-HOLOCENE [18602]					VOL					WR [18602]	46.7	1.812		16.114				10.27	9.813	8.578	0.157		1.233	3.15	0.45
Andean Southern Volcanic Arc Zones.csv	[18602][19131][18019]	7(11) SVZ rear-arc	Payun Matru Volcanic Field	Payun Matru	94	25	C Chile rear-arc	ANDEAN ARC / SOUTHERN ANDEAN VOLCANIC ZONE / ARGENTINA / PAYUN MATRU VOLCANIC FIELD	PAYENIA VOLCANIC PROVINCE, SOUTHERN MENDOZA, LOS VOLCANES, LA PASARELA	-36.3106	-36.3106	-69.667	-69.667	SAE			s_123917 [18602]	BASALT, ALKALINE [18602] / BASALT [18019]	PLEISTOCENE-HOLOCENE [18602]				PLEISTOCENE-HOLOCENE [18602]					VOL					WR [18602]	47.346	1.789		16.355				9.82	10.868	7.49	0.153		0.745	3.18	0.325
Andean Southern Volcanic Arc Zones.csv	[18602][18019]	7(11) SVZ rear-arc	Payun Matru Volcanic Field	Payun Matru	94	25	C Chile rear-arc	ANDEAN ARC / SOUTHERN ANDEAN VOLCANIC ZONE / ARGENTINA / PAYUN MATRU VOLCANIC FIELD	PAYENIA VOLCANIC PROVINCE, SOUTHERN MENDOZA, LOS VOLCANES	-36.5348	-36.5348	-69.6302	-69.6302	SAE			s_126280 [18602]	BASALT, ALKALINE [18602] / BASALT [18019]	PLEISTOCENE-HOLOCENE [18602]				PLEISTOCENE-HOLOCENE [18602]					VOL					WR [18602]	47.31	2.1		16.15				10.45	9.88	6.47	0.16		0.98	3.54	0.43
Andean Southern Volcanic Arc Zones.csv	[18602][19131]	7(11) SVZ rear-arc	Payun Matru Volcanic Field	Payun Matru	94	25	C Chile rear-arc	ANDEAN ARC / SOUTHERN ANDEAN VOLCANIC ZONE / ARGENTINA / PAYUN MATRU VOLCANIC FIELD	PAYENIA VOLCANIC PROVINCE, SOUTHERN MENDOZA, CARA CURA, BASAL FLOW BELOW EL JINETE	-36.5567	-36.5567	-69.6144	-69.6144	SAE			s_126239 [18602]	BASALT, ALKALINE [18602]	PLEISTOCENE-HOLOCENE [18602]				PLEISTOCENE-HOLOCENE [18602]					VOL					WR [18602]	47.82	1.35		17.26				10.05	10.61	7.63	0.17		0.41	3.22	0.18
Andean Southern Volcanic Arc Zones.csv	[18602][19131][18019]	7(11) SVZ rear-arc	Payun Matru Volcanic Field	Payun Matru	94	25	C Chile rear-arc	ANDEAN ARC / SOUTHERN ANDEAN VOLCANIC ZONE / ARGENTINA / PAYUN MATRU VOLCANIC FIELD	PAYENIA VOLCANIC PROVINCE, SOUTHERN MENDOZA, EAST PAMPAS, RANQUIL DEL PAYEN	-36.6059	-36.6059	-68.623	-68.623	SAE			s_123944 [18602]	BASALT, ALKALINE [18602] / TRACHYBASALT [18019]	PLEISTOCENE-HOLOCENE [18602]				PLEISTOCENE-HOLOCENE [18602]					VOL					WR [18602]	47.981	2.308		14.768				10.99	8.354	8.074	0.147		1.482	3.87	0.565
Andean Southern Volcanic Arc Zones.csv	[18602][19131][18019]	7(11) SVZ rear-arc	Payun Matru Volcanic Field	Payun Matru	94	25	C Chile rear-arc	ANDEAN ARC / SOUTHERN ANDEAN VOLCANIC ZONE / ARGENTINA / PAYUN MATRU VOLCANIC FIELD	PAYENIA VOLCANIC PROVINCE, SOUTHERN MENDOZA, EAST PAMPAS, LONCO VACA	-36.6952	-36.6952	-68.7529	-68.7529	SAE			s_123946 [18602]	BASALT, ALKALINE [18602] / BASALT [18019]	PLEISTOCENE-HOLOCENE [18602]				PLEISTOCENE-HOLOCENE [18602]					VOL					WR [18602]	48.866	1.464		16.505				10.25	8.952	8.244	0.152		0.869	3.35	0.277
Andean Southern Volcanic Arc Zones.csv	[18961]	7(11) SVZ rear-arc	Payun Matru Volcanic Field	Payun Matru	94	25	C Chile rear-arc	ANDEAN ARC / SOUTHERN ANDEAN VOLCANIC ZONE / ARGENTINA / PAYUN MATRU VOLCANIC FIELD	PAYENIA VOLCANIC PROVINCE, SOUTHERN MENDOZA, LOS VOLCANES	-36.3139	-36.3139	-69.554	-69.554	SAE			s_LV3 [18961]	BASALT [18961]	QUATERNARY [18961]				QUATERNARY [18961]					VOL					WR [18961]	46.95	1.969		17.09				10.92	10.55	7.063	0.1536		1.243	3.398	0.4177
Andean Southern Volcanic Arc Zones.csv	[18961]	7(11) SVZ rear-arc	Payun Matru Volcanic Field	Payun Matru	94	25	C Chile rear-arc	ANDEAN ARC / SOUTHERN ANDEAN VOLCANIC ZONE / ARGENTINA / PAYUN MATRU VOLCANIC FIELD	PAYENIA VOLCANIC PROVINCE, SOUTHERN MENDOZA, LOS VOLCANES	-36.4541	-36.4541	-69.3812	-69.3812	SAE			s_LV6 [18961]	BASALT [18961]	QUATERNARY [18961]				QUATERNARY [18961]					VOL					WR [18961]	46.83	2.195		17.06				10.81	11.04	6.517	0.1469		1.153	3.6	0.3844
Andean Southern Volcanic Arc Zones.csv	[18961]	7(11) SVZ rear-arc	Payun Matru Volcanic Field	Payun Matru	94	25	C Chile rear-arc	ANDEAN ARC / SOUTHERN ANDEAN VOLCANIC ZONE / ARGENTINA / PAYUN MATRU VOLCANIC FIELD	PAYENIA VOLCANIC PROVINCE, SOUTHERN MENDOZA, LOS VOLCANES	-36.4136	-36.4136	-69.5848	-69.5848	SAE			s_LV8 [18961]	BASALT [18961]	QUATERNARY [18961]				QUATERNARY [18961]					VOL					WR [18961]	46.06	1.98		16.49				11.45	10.28	6.913	0.1575		1.295	3.502	0.4756
Andean Southern Volcanic Arc Zones.csv	[18961]	7(11) SVZ rear-arc	Payun Matru Volcanic Field	Payun Matru	94	25	C Chile rear-arc	ANDEAN ARC / SOUTHERN ANDEAN VOLCANIC ZONE / ARGENTINA / PAYUN MATRU VOLCANIC FIELD	PAYENIA VOLCANIC PROVINCE, SOUTHERN MENDOZA, RIO GRANDE	-36.3132	-36.3132	-69.6659	-69.6659	SAE			s_RG5 [18961]	BASALT [18961]	QUATERNARY [18961]				QUATERNARY [18961]					VOL					WR [18961]	48.39	1.748		15.83				10.82	10.49	7.386	0.1492		0.8697	3.002	0.298
Andean Southern Volcanic Arc Zones.csv	[18961]	7(11) SVZ rear-arc	Payun Matru Volcanic Field	Payun Matru	94	25	C Chile rear-arc	ANDEAN ARC / SOUTHERN ANDEAN VOLCANIC ZONE / ARGENTINA / PAYUN MATRU VOLCANIC FIELD	PAYENIA VOLCANIC PROVINCE, SOUTHERN MENDOZA, LOS VOLCANES	-36.4165	-36.4165	-69.5991	-69.5991	SAE			s_LV9 [18961]	BASALT [18961]	QUATERNARY [18961]				QUATERNARY [18961]					VOL					WR [18961]	46.92	1.724		15.49				10.78	9.767	7.325	0.1611		1.401	3.209	0.3788
Andean Southern Volcanic Arc Zones.csv	[18961]	7(11) SVZ rear-arc	Payun Matru Volcanic Field	Payun Matru	94	25	C Chile rear-arc	ANDEAN ARC / SOUTHERN ANDEAN VOLCANIC ZONE / ARGENTINA / PAYUN MATRU VOLCANIC FIELD	PAYENIA VOLCANIC PROVINCE, SOUTHERN MENDOZA, LA PASARELA	-36.3142	-36.3142	-69.6634	-69.6634	SAE			s_VRE12 [18961]	BASALT [18961]	QUATERNARY [18961]				QUATERNARY [18961]					VOL					WR [18961]	46.77	1.764		17.03				10.37	10.08	7.698	0.1592		0.9999	3.753	0.4235
Andean Southern Volcanic Arc Zones.csv	[18961]	7(11) SVZ rear-arc	Payun Matru Volcanic Field	Payun Matru	94	25	C Chile rear-arc	ANDEAN ARC / SOUTHERN ANDEAN VOLCANIC ZONE / ARGENTINA / PAYUN MATRU VOLCANIC FIELD	PAYENIA VOLCANIC PROVINCE, SOUTHERN MENDOZA, PAYUNIA	-36.2103	-36.2103	-69.3952	-69.3952	SAE			s_VRE40 [18961]	BASALT [18961]	QUATERNARY [18961]				QUATERNARY [18961]					VOL					WR [18961]	49.2	1.905		17.04				11.45	8.764	6.639	0.1457		0.897	3.426	0.3191
Andean Southern Volcanic Arc Zones.csv	[18961]	7(11) SVZ rear-arc	Payun Matru Volcanic Field	Payun Matru	94	25	C Chile rear-arc	ANDEAN ARC / SOUTHERN ANDEAN VOLCANIC ZONE / ARGENTINA / PAYUN MATRU VOLCANIC FIELD	PAYENIA VOLCANIC PROVINCE, SOUTHERN MENDOZA, PAYUNIA, W SIDE OF SANTA MARIA	-36.2297	-36.2297	-69.3361	-69.3361	SAE			s_SM16 [18961]	BASALT [18961]	QUATERNARY [18961]				QUATERNARY [18961]					VOL					WR [18961]	46.26	2.283		16.62				10.86	9.658	6.142	0.1472		1.292	3.542	0.5642
Andean Southern Volcanic Arc Zones.csv	[18961]	7(11) SVZ rear-arc	Payun Matru Volcanic Field	Payun Matru	94	25	C Chile rear-arc	ANDEAN ARC / SOUTHERN ANDEAN VOLCANIC ZONE / ARGENTINA / PAYUN MATRU VOLCANIC FIELD	PAYENIA VOLCANIC PROVINCE, SOUTHERN MENDOZA, PAYUNIA, W SIDE OF SANTA MARIA	-36.2353	-36.2353	-69.3132	-69.3132	SAE			s_SM18 [18961]	BASALT [18961]	QUATERNARY [18961]				QUATERNARY [18961]					VOL					WR [18961]	46.94	1.792		17.07				10.94	11.16	7.124	0.1519		0.815	3.366	0.3381
Andean Southern Volcanic Arc Zones.csv	[18961]	7(11) SVZ rear-arc	Payun Matru Volcanic Field	Payun Matru	94	25	C Chile rear-arc	ANDEAN ARC / SOUTHERN ANDEAN VOLCANIC ZONE / ARGENTINA / PAYUN MATRU VOLCANIC FIELD	PAYENIA VOLCANIC PROVINCE, SOUTHERN MENDOZA, PAMPAS ONDULADAS	-37.0572	-37.0572	-67.5203	-67.5203	SAE			s_VRE49 [18961]	BASALT [18961]	QUATERNARY [18961]				QUATERNARY [18961]					VOL					WR [18961]	49.34	1.405		16.68				11.4	7.749	8.11	0.1464		0.7979	3.866	0.2753
Andean Central Volcanic Arc Zones.csv	[13901]	7(11) SVZ rear-arc	Payun Matru Volcanic Field	Payun Matru	94	25	C Chile rear-arc	ANDEAN ARC / CENTRAL ANDEAN VOLCANIC ZONE / ARGENTINA / PAYEN VOLCANIC COMPLEX / PAMPAS ONDULADAS FLOW		-36.2	-36.6	-68.7	-69.1	SAE			s_PY2AR [13901]	BASALT [13901]	Quaternary									VOL					WR [13901]	48.66	1.75		16.93				10.17	9.05	7.53	0.16		1.22	3.39	0.45
Andean Central Volcanic Arc Zones.csv	[13901]	7(11) SVZ rear-arc	Payun Matru Volcanic Field	Payun Matru	94	25	C Chile rear-arc	ANDEAN ARC / CENTRAL ANDEAN VOLCANIC ZONE / ARGENTINA / PAYEN VOLCANIC COMPLEX / PAMPAS ONDULADAS FLOW		-36.2	-36.6	-68.7	-69.1	SAE			s_PY3AR [13901]	BASALT [13901]	Quaternary									VOL					WR [13901]	48.41	1.93		16.48				10.28	9.37	7.05	0.17		1.25	3.47	0.5
Andean Central Volcanic Arc Zones.csv	[13901]	7(11) SVZ rear-arc	Payun Matru Volcanic Field	Payun Matru	94	25	C Chile rear-arc	ANDEAN ARC / CENTRAL ANDEAN VOLCANIC ZONE / ARGENTINA / PAYEN VOLCANIC COMPLEX / PAMPAS ONDULADAS FLOW		-36.2	-36.6	-68.7	-69.1	SAE			s_PY6AR [13901]	BASALT [13901]	Quaternary									VOL					WR [13901]	48.41	1.75		16.75				10.13	9.28	7.45	0.16		1.21	3.44	0.46
Andean Central Volcanic Arc Zones.csv	[13901]	7(11) SVZ rear-arc	Payun Matru Volcanic Field	Payun Matru	94	25	C Chile rear-arc	ANDEAN ARC / CENTRAL ANDEAN VOLCANIC ZONE / ARGENTINA / PAYEN VOLCANIC COMPLEX / PAMPAS ONDULADAS FLOW	NORTHERN BRANCH OF PAMPAS ONDULADAS LAVA FLOW	-36.2	-36.6	-68.7	-69.1	SAE			s_PY39 [13901]	BASALT [13901]	Quaternary									VOL					WR [13901]	48.75	1.57		17.8		1.68	8.29		9.28	7.13	0.16		0.94	3.62	0.28
Andean Central Volcanic Arc Zones.csv	[13901]	7(11) SVZ rear-arc	Payun Matru Volcanic Field	Payun Matru	94	25	C Chile rear-arc	ANDEAN ARC / CENTRAL ANDEAN VOLCANIC ZONE / ARGENTINA / PAYEN VOLCANIC COMPLEX / PAMPAS ONDULADAS FLOW	NORTHERN BRANCH OF PAMPAS ONDULADAS LAVA FLOW	-36.2	-36.6	-68.7	-69.1	SAE			s_PY40 [13901]	BASALT [13901]	Quaternary									VOL					WR [13901]	48.37	1.7		17.73		0.99	9.13		8.96	7.14	0.16		0.78	3.74	0.28
Andean Central Volcanic Arc Zones.csv	[13901]	7(11) SVZ rear-arc	Payun Matru Volcanic Field	Payun Matru	94	25	C Chile rear-arc	ANDEAN ARC / CENTRAL ANDEAN VOLCANIC ZONE / ARGENTINA / PAYEN VOLCANIC COMPLEX / PAMPAS ONDULADAS FLOW	NORTHERN BRANCH OF PAMPAS ONDULADAS LAVA FLOW	-36.2	-36.6	-68.7	-69.1	SAE			s_PY42 [13901]	BASALT [13901]	Quaternary									VOL					WR [13901]	47.76	1.63		17.68		0.47	9.7		9.43	7.24	0.16		0.77	3.63	0.26
Andean Central Volcanic Arc Zones.csv	[13901]	7(11) SVZ rear-arc	Payun Matru Volcanic Field	Payun Matru	94	25	C Chile rear-arc	ANDEAN ARC / CENTRAL ANDEAN VOLCANIC ZONE / ARGENTINA / PAYEN VOLCANIC COMPLEX / PAMPAS ONDULADAS FLOW	NORTHERN BRANCH OF PAMPAS ONDULADAS LAVA FLOW	-36.2	-36.6	-68.7	-69.1	SAE			s_PY44 [13901]	BASALT [13901]	Quaternary									VOL					WR [13901]	46.65	1.5		17.41		1.02	9.01		9.78	8.39	0.16		0.85	3.25	0.3
Andean Central Volcanic Arc Zones.csv	[13901]	7(11) SVZ rear-arc	Payun Matru Volcanic Field	Payun Matru	94	25	C Chile rear-arc	ANDEAN ARC / CENTRAL ANDEAN VOLCANIC ZONE / ARGENTINA / PAYEN VOLCANIC COMPLEX / LOS CARRIZALES FLOW	LOS CARRIZALES LAVA FIELD	-36.2	-36.6	-68.7	-69.1	SAE			s_PY36 [13901]	BASALT [13901]	Quaternary									VOL					WR [13901]	47.74	1.3		16.92		0.25	10.37		9.25	8.15	0.16		0.68	2.98	0.17
Andean Southern Volcanic Arc Zones.csv	[17913]	SVZ rear-arc	Payun Matru Volcanic Field	Payun Matru	94	25	C Chile rear-arc	ANDEAN ARC / SOUTHERN ANDEAN VOLCANIC ZONE / ARGENTINA	PAMPAS NEGRAS	-36.3748	-36.3748	-69.4025	-69.4025	SAE			s_CL 372 [17913]	NOT GIVEN [17913]	Holocene,arc+backarc									VOL			F		WR [17913]	46.2606	2.16863		17.5314				11.4917	10.4986	6.00932	0.152006		1.33766	3.74949	0.597892
Andean Southern Volcanic Arc Zones.csv	[17913]	SVZ rear-arc	Payun Matru Volcanic Field	Payun Matru	94	25	C Chile rear-arc	ANDEAN ARC / SOUTHERN ANDEAN VOLCANIC ZONE / ARGENTINA	PAMPAS NEGRAS	-36.319	-36.319	-69.6836	-69.6836	SAE			s_CL 387 [17913]	NOT GIVEN [17913]	Holocene,arc+backarc									VOL			F		WR [17913]	47.7202	1.75596		16.2826				11.4337	10.426	7.62247	0.149656		0.77821	3.33234	0.33922
Andean Southern Volcanic Arc Zones.csv	[18602]	7(11) SVZ rear-arc	Los Volcanes	Payun Matru	94	25	C Chile rear-arc	ANDEAN ARC / SOUTHERN ANDEAN VOLCANIC ZONE / ARGENTINA / LOS VOLCANES VOLCANIC FIELD	PAYENIA VOLCANIC PROVINCE, SOUTHERN MENDOZA, LA BARSANELA	-36.3212	-36.3212	-69.6804	-69.6804	SAE			s_123916 [18602]	BASALT, ALKALINE [18602]	PLEISTOCENE-HOLOCENE [18602]				PLEISTOCENE-HOLOCENE [18602]					VOL					WR [18602]	47.961	1.864		16.702				9.98	10.386	7.104	0.153		0.911	3.19	0.356
Andean Southern Volcanic Arc Zones.csv	[14391]	7(11) SVZ rear-arc	Los Volcanes	Payun Matru	94	25	C Chile rear-arc	ANDEAN ARC / SOUTHERN ANDEAN VOLCANIC ZONE / ARGENTINA / LOS VOLCANES VOLCANIC FIELD		-36.2	-36.6	-69.25	-69.6	SAE			s_88Q [14391]	BASALT [14391]	PLEISTOCENE [14391]				PLEISTOCENE [14391]					VOL			F		WR [14391]	48.75	1.63		16.91				9.28	9.53	6.71	0.15		1.56	3.22	0.35
Andean Southern Volcanic Arc Zones.csv	[14391]	7(11) SVZ rear-arc	Los Volcanes	Payun Matru	94	25	C Chile rear-arc	ANDEAN ARC / SOUTHERN ANDEAN VOLCANIC ZONE / ARGENTINA / LOS VOLCANES VOLCANIC FIELD		-36.3133	-36.3133	-69.664	-69.664	SAE			s_88S [14391]	BASALT [14391]	PLEISTOCENE [14391]				PLEISTOCENE [14391]					VOL			F		WR [14391]	47.66	1.8		17.36				9.85	10.31	7.42	0.15		1.04	3.59	0.33
Andean Southern Volcanic Arc Zones.csv	[14391]	7(11) SVZ rear-arc	Los Volcanes	Payun Matru	94	25	C Chile rear-arc	ANDEAN ARC / SOUTHERN ANDEAN VOLCANIC ZONE / ARGENTINA / LOS VOLCANES VOLCANIC FIELD		-36.4822	-36.4822	-69.3727	-69.3727	SAE			s_88AB [14391]	BASALT [14391]	PLEISTOCENE [14391]				PLEISTOCENE [14391]					VOL			F		WR [14391]	46.97	1.89		17.68				10.24	10.49	6.43	0.16		1.13	3.47	0.39
Andean Southern Volcanic Arc Zones.csv	[14391]	7(11) SVZ rear-arc	Los Volcanes	Payun Matru	94	25	C Chile rear-arc	ANDEAN ARC / SOUTHERN ANDEAN VOLCANIC ZONE / ARGENTINA / LOS VOLCANES VOLCANIC FIELD		-36.2	-36.6	-69.25	-69.6	SAE			s_94P [14391]	BASALT [14391]	PLEISTOCENE [14391]				PLEISTOCENE [14391]					VOL			F		WR [14391]	48.71	1.76		16.1				10.1	9.64	7.96	0.17		1.39	3.59	0.4
Andean Southern Volcanic Arc Zones.csv	[14391]	7(11) SVZ rear-arc	Los Volcanes	Payun Matru	94	25	C Chile rear-arc	ANDEAN ARC / SOUTHERN ANDEAN VOLCANIC ZONE / ARGENTINA / LOS VOLCANES VOLCANIC FIELD		-36.2	-36.6	-69.25	-69.6	SAE			s_94N [14391]	BASALT [14391]	PLEISTOCENE [14391]				PLEISTOCENE [14391]					VOL			F		WR [14391]	46.51	1.96		16.55				10.31	10.12	6.82	0.17		1.16	3.52	0.43
Andean Southern Volcanic Arc Zones.csv	[14391]	7(11) SVZ rear-arc	Los Volcanes	Payun Matru	94	25	C Chile rear-arc	ANDEAN ARC / SOUTHERN ANDEAN VOLCANIC ZONE / ARGENTINA / LOS VOLCANES VOLCANIC FIELD		-36.2	-36.6	-69.25	-69.6	SAE			s_94AD [14391]	BASALT [14391]	PLEISTOCENE [14391]				PLEISTOCENE [14391]					VOL			F		WR [14391]	48.88	1.79		17.15				9.9	9.28	6.39	0.16		1.21	3.85	0.48
Andean Southern Volcanic Arc Zones.csv	[14391]	7(11) SVZ rear-arc	Los Volcanes	Payun Matru	94	25	C Chile rear-arc	ANDEAN ARC / SOUTHERN ANDEAN VOLCANIC ZONE / ARGENTINA / LOS VOLCANES VOLCANIC FIELD		-36.3079	-36.3079	-69.2967	-69.2967	SAE			s_94AF [14391]	BASALT [14391]	PLEISTOCENE [14391]				PLEISTOCENE [14391]					VOL			F		WR [14391]	48.8	2.11		16.51				10.58	10.59	6.87	0.16		1.02	3.38	0.38
Andean Southern Volcanic Arc Zones.csv	[14391]	7(11) SVZ rear-arc	Los Volcanes	Payun Matru	94	25	C Chile rear-arc	ANDEAN ARC / SOUTHERN ANDEAN VOLCANIC ZONE / ARGENTINA / LOS VOLCANES VOLCANIC FIELD		-36.2	-36.6	-69.25	-69.6	SAE			s_94V [14391]	BASALT [14391]	PLEISTOCENE [14391]				PLEISTOCENE [14391]					VOL			F		WR [14391]	46.66	2.15		17.35				10.46	11.06	6.77	0.17		1.15	3.51	0.42
Andean Southern Volcanic Arc Zones.csv	[14391]	7(11) SVZ rear-arc	Los Volcanes	Payun Matru	94	25	C Chile rear-arc	ANDEAN ARC / SOUTHERN ANDEAN VOLCANIC ZONE / ARGENTINA / LOS VOLCANES VOLCANIC FIELD		-36.2	-36.6	-69.25	-69.6	SAE			s_94W [14391]	BASALT [14391]	PLEISTOCENE [14391]				PLEISTOCENE [14391]					VOL			F		WR [14391]	48.6	1.84		16.67				9.61	10.3	6.9	0.16		1.24	3.47	0.43
Andean Southern Volcanic Arc Zones.csv	[18602][19131]	7(11) SVZ rear-arc	Tromen	Tromen	95	25	C Chile rear-arc	ANDEAN ARC / SOUTHERN ANDEAN VOLCANIC ZONE / ARGENTINA / TROMEN	PAYENIA VOLCANIC PROVINCE, SOUTHERN MENDOZA, COCHIQUITO	-36.753	-36.753	-69.8612	-69.8612	SAE			s_123966 [18602]	BASALT, ALKALINE [18602]	PLEISTOCENE-HOLOCENE [18602]				PLEISTOCENE-HOLOCENE [18602]					VOL					WR [18602]	48.832	1.44		16.89				8.91	9.305	7.8	0.149		1.495	3.65	0.521
Andean Southern Volcanic Arc Zones.csv	[17913]	7(11) SVZ rear-arc	Tromen	Tromen	95	25	C Chile rear-arc	ANDEAN ARC / SOUTHERN ANDEAN VOLCANIC ZONE / ARGENTINA	BUTA RANQUIL	-37.0071	-37.0071	-69.823	-69.823	SAE			s_CL 472 [17913]	NOT GIVEN [17913]	Holocene,arc+backarc									VOL			F		WR [17913]	46.7118	1.12595		17.0586				10.8111	12.2858	7.67238	0.159426		1.13591	2.52092	0.33878
Andean Southern Volcanic Arc Zones.csv	[17913]	7(11) SVZ rear-arc	Tromen	Tromen	95	25	C Chile rear-arc	ANDEAN ARC / SOUTHERN ANDEAN VOLCANIC ZONE / ARGENTINA / TROMEN		-37.0342	-37.0342	-69.8503	-69.8503	SAE			s_CL 406 [17913]	NOT GIVEN [17913]	Holocene,arc+backarc									VOL			F		WR [17913]	48.2322	1.51226		17.7666				10.9364	10.7962	6.77014	0.170255		0.68102	3.15473	0.26039
Andean Southern Volcanic Arc Zones.csv	[18602]	7(11) SVZ rear-arc	Tromen	Tromen	95	25	C Chile rear-arc	ANDEAN ARC / SOUTHERN ANDEAN VOLCANIC ZONE / ARGENTINA / TROMEN	PAYENIA VOLCANIC PROVINCE, SOUTHERN MENDOZA, N OF BUTA RANQUIL	-37.016	-37.016	-69.8414	-69.8414	SAE			s_123968 [18602]	BASALT, ALKALINE [18602]	PLEISTOCENE-HOLOCENE [18602]				PLEISTOCENE-HOLOCENE [18602]					VOL					WR [18602]	50.691	1.428		16.687				9.18	9.202	6.618	0.148		1.037	3.5	0.255
Andean Southern Volcanic Arc Zones.csv	[18602][18019]	7(11) SVZ rear-arc	Rio Colorado Volcanic Field	Auca Mahuida	96	25	C Chile rear-arc	ANDEAN ARC / SOUTHERN ANDEAN VOLCANIC ZONE / ARGENTINA / RIO COLORADO VOLCANIC FIELD	PAYENIA VOLCANIC PROVINCE, SOUTHERN MENDOZA, CERRO MORADO	-37.3042	-37.3042	-69.0184	-69.0184	SAE			s_126175 [18602]	BASALT, ALKALINE [18602] / TRACHYBASALT [18019]	PLEISTOCENE-HOLOCENE [18602]				PLEISTOCENE-HOLOCENE [18602]					VOL					WR [18602]	46.49	1.63		13.72				10.08	7.2	13	0.15		1.78	3.63	0.46
Andean Southern Volcanic Arc Zones.csv	[18602][18019]	7(11) SVZ rear-arc	Rio Colorado Volcanic Field	Auca Mahuida	96	25	C Chile rear-arc	ANDEAN ARC / SOUTHERN ANDEAN VOLCANIC ZONE / ARGENTINA / RIO COLORADO VOLCANIC FIELD	PAYENIA VOLCANIC PROVINCE, SOUTHERN MENDOZA, CERRO CHICO	-37.3183	-37.3183	-69.0234	-69.0234	SAE			s_126179 [18602]	BASALT, ALKALINE [18602] / TRACHYBASALT [18019]	PLEISTOCENE-HOLOCENE [18602]				PLEISTOCENE-HOLOCENE [18602]					VOL					WR [18602]	47.07	2.09		15.39				10.94	9	6.93	0.16		1.29	3.86	0.48
Andean Southern Volcanic Arc Zones.csv	[18602][19131][18019]	7(11) SVZ rear-arc	Rio Colorado Volcanic Field	Auca Mahuida	96	25	C Chile rear-arc	ANDEAN ARC / SOUTHERN ANDEAN VOLCANIC ZONE / ARGENTINA / RIO COLORADO VOLCANIC FIELD	PAYENIA VOLCANIC PROVINCE, SOUTHERN MENDOZA, CERRO MENDEZ	-37.3288	-37.3288	-68.9585	-68.9585	SAE			s_126230 [18602]	BASALT, ALKALINE [18602] / TRACHYBASALT [18019]	PLEISTOCENE-HOLOCENE [18602]				PLEISTOCENE-HOLOCENE [18602]					VOL					WR [18602]	49.33	1.71		15.89				8.47	7.44	7.71	0.14		2.5	4.38	0.59
Andean Southern Volcanic Arc Zones.csv	[18602][18019]	7(11) SVZ rear-arc	Rio Colorado Volcanic Field	Auca Mahuida	96	25	C Chile rear-arc	ANDEAN ARC / SOUTHERN ANDEAN VOLCANIC ZONE / ARGENTINA / RIO COLORADO VOLCANIC FIELD	PAYENIA VOLCANIC PROVINCE, SOUTHERN MENDOZA, RIO COLORADO FOOT BRIDGE	-37.3654	-37.3654	-69.0162	-69.0162	SAE			s_126171 [18602]	BASALT, ALKALINE [18602] / BASALT [18019]	PLEISTOCENE-HOLOCENE [18602]				PLEISTOCENE-HOLOCENE [18602]					VOL					WR [18602]	48.11	2.22		15.71				11.1	9.05	6.22	0.16		1.11	3.61	0.5
Andean Southern Volcanic Arc Zones.csv	[18602][18019]	7(11) SVZ rear-arc	Rio Colorado Volcanic Field	Auca Mahuida	96	25	C Chile rear-arc	ANDEAN ARC / SOUTHERN ANDEAN VOLCANIC ZONE / ARGENTINA / RIO COLORADO VOLCANIC FIELD	PAYENIA VOLCANIC PROVINCE, SOUTHERN MENDOZA, W OF CHACHAHUEN	-37.0521	-37.0521	-69.183	-69.183	SAE			s_126229 [18602]	BASALT, ALKALINE [18602] / BASALT [18019]	PLEISTOCENE-HOLOCENE [18602]				PLEISTOCENE-HOLOCENE [18602]					VOL					WR [18602]	47.78	2.05		16.05				9.62	9.12	6.31	0.15		1.77	3.92	0.45
Andean Southern Volcanic Arc Zones.csv	[18602]	7(11) SVZ rear-arc	Rio Colorado Volcanic Field	Auca Mahuida	96	25	C Chile rear-arc	ANDEAN ARC / SOUTHERN ANDEAN VOLCANIC ZONE / ARGENTINA / RIO COLORADO VOLCANIC FIELD	PAYENIA VOLCANIC PROVINCE, SOUTHERN MENDOZA, CERRO MORADO	-37.2852	-37.2852	-69.0186	-69.0186	SAE			s_126172 [18602]	BASALT, ALKALINE [18602]	PLEISTOCENE-HOLOCENE [18602]				PLEISTOCENE-HOLOCENE [18602]					VOL					WR [18602]	49.12	1.71		15.11				10.03	8.24	9.52	0.15		1.03	3.63	0.32
Andean Southern Volcanic Arc Zones.csv	[18602]	7(11) SVZ rear-arc	Rio Colorado Volcanic Field	Auca Mahuida	96	25	C Chile rear-arc	ANDEAN ARC / SOUTHERN ANDEAN VOLCANIC ZONE / ARGENTINA / RIO COLORADO VOLCANIC FIELD	PAYENIA VOLCANIC PROVINCE, SOUTHERN MENDOZA, CERRO MORADO	-37.3013	-37.3013	-69.0142	-69.0142	SAE			s_126174 [18602]	BASALT, ALKALINE [18602]	PLEISTOCENE-HOLOCENE [18602]				PLEISTOCENE-HOLOCENE [18602]					VOL					WR [18602]	46.76	1.52		14.91				10.17	9.87	9.48	0.17		1.12	2.81	0.57
Andean Southern Volcanic Arc Zones.csv	[17913]	7(11) SVZ rear-arc	Auca Mahuida Volcanic Field	Auca Mahuida	96	25	C Chile rear-arc	ANDEAN ARC / SOUTHERN ANDEAN VOLCANIC ZONE / ARGENTINA	AUCA MAHUIDA	-37.7206	-37.7206	-68.9232	-68.9232	SAE			s_CL 392 [17913]	NOT GIVEN [17913]	Holocene,arc+backarc									VOL			F		WR [17913]	46.9352	2.25738		14.3717				12.0019	9.40746	9.65261	0.16343		1.15423	3.25839	0.582221
Andean Southern Volcanic Arc Zones.csv	[17913]	7(11) SVZ rear-arc	Auca Mahuida Volcanic Field	Auca Mahuida	96	25	C Chile rear-arc	ANDEAN ARC / SOUTHERN ANDEAN VOLCANIC ZONE / ARGENTINA	AUCA MAHUIDA	-37.6061	-37.6061	-68.8147	-68.8147	SAE			s_CL 401 [17913]	NOT GIVEN [17913]	Holocene,arc+backarc									VOL			F		WR [17913]	48.5779	1.97332		15.9577				11.3768	9.16184	7.5711	0.161087		0.966524	3.69494	0.382582
Andean Southern Volcanic Arc Zones.csv	[17913]	7(11) SVZ rear-arc	Auca Mahuida Volcanic Field	Auca Mahuida	96	25	C Chile rear-arc	ANDEAN ARC / SOUTHERN ANDEAN VOLCANIC ZONE / ARGENTINA	AUCA MAHUIDA	-37.3019	-37.3019	-68.9069	-68.9069	SAE			s_CL 404 [17913]	NOT GIVEN [17913]	Holocene,arc+backarc									VOL			F		WR [17913]	48.2377	1.96826		15.4606				10.8	8.89288	8.03622	0.152974		1.86628	3.70197	0.64249
Andean Southern Volcanic Arc Zones.csv	[17913]	7(11) SVZ rear-arc	Auca Mahuida Volcanic Field	Auca Mahuida	96	25	C Chile rear-arc	ANDEAN ARC / SOUTHERN ANDEAN VOLCANIC ZONE / ARGENTINA	AUCA MAHUIDA	-37.3019	-37.3019	-68.9069	-68.9069	SAE			s_CL 456 [17913]	NOT GIVEN [17913]	Holocene,arc+backarc									VOL			F		WR [17913]	48.9517	2.12701		15.4057				11.9619	8.8423	6.90773	0.162058		1.12428	3.91978	0.455789
Andean Southern Volcanic Arc Zones.csv	[4352][6652]	7(11) SVZ rear-arc	Laguna Blanca group	Laguna Blanca group	97	26	SC Chile rear-arc	ANDEAN ARC / SOUTHERN ANDEAN VOLCANIC ZONE / ARGENTINA	LAGUNA BLANCA	-38.92	-38.92	-70.15	-70.15	SAE			s_TC50 [4352]	BASALT [4352] / NOT GIVEN [6652]	HOLOCENE [6652]				HOLOCENE [6652]					VOL					WR [4352]	48.83	1.45		16.72		3.39	5.88		8.58	8.27	0.15		2.42	3.24	0.76
Andean Southern Volcanic Arc Zones.csv	[14959]	7(11) SVZ rear-arc	Laguna Blanca group	Laguna Blanca group	97	26	SC Chile rear-arc	ANDEAN ARC / SOUTHERN ANDEAN VOLCANIC ZONE / ARGENTINA	LONCOPUE AREA, NEUQUEN PROVINCE	-37.6239	-37.6239	-70.5904	-70.5904	SAE			s_AH-5 [14959]	BASALT [14959]	Pliocene-Holocene, mainly Holocene									VOL					WR [14959]	50.4	1.4		17.5				8.46	8.9	6.3	0.2		1.2	3.6	0.4
Andean Southern Volcanic Arc Zones.csv	[14959]	7(11) SVZ rear-arc	Laguna Blanca group	Laguna Blanca group	97	26	SC Chile rear-arc	ANDEAN ARC / SOUTHERN ANDEAN VOLCANIC ZONE / ARGENTINA	LAS LAJAS AREA, NEUQUEN PROVINCE	-38.3051	-38.3051	-70.6138	-70.6138	SAE			s_AH-8 [14959]	BASALT [14959]	Pliocene-Holocene, mainly Holocene									VOL					WR [14959]	51.4	1.4		16.8				8.28	8.4	7.5	0.1		1.4	3.4	0.4
Andean Southern Volcanic Arc Zones.csv	[14959]	7(11) SVZ rear-arc	Laguna Blanca group	Laguna Blanca group	97	26	SC Chile rear-arc	ANDEAN ARC / SOUTHERN ANDEAN VOLCANIC ZONE / ARGENTINA	LAS LAJAS AREA, NEUQUEN PROVINCE	-38.3051	-38.3051	-70.6138	-70.6138	SAE			s_AH-9 [14959]	BASALT [14959]	Pliocene-Holocene, mainly Holocene									VOL					WR [14959]	49.1	1.4		16.6				9.18	8.6	8.2	0.2		1.2	3.5	0.3
Andean Southern Volcanic Arc Zones.csv	[14959]	7(11) SVZ rear-arc	Laguna Blanca group	Laguna Blanca group	97	26	SC Chile rear-arc	ANDEAN ARC / SOUTHERN ANDEAN VOLCANIC ZONE / ARGENTINA	LAS LAJAS AREA, NEUQUEN PROVINCE	-38.5336	-38.5336	-70.5889	-70.5889	SAE			s_AH-10 [14959]	BASALT [14959]	Pliocene-Holocene, mainly Holocene									VOL					WR [14959]	47.9	1.5		16.7				9.9	10.6	7.8	0.2		1	2.8	0.4
Andean Southern Volcanic Arc Zones.csv	[14959]	7(11) SVZ rear-arc	Laguna Blanca group	Laguna Blanca group	97	26	SC Chile rear-arc	ANDEAN ARC / SOUTHERN ANDEAN VOLCANIC ZONE / ARGENTINA	LAS LAJAS AREA, NEUQUEN PROVINCE	-38.5336	-38.5336	-70.5889	-70.5889	SAE			s_AH-11 [14959]	BASALT [14959]	Pliocene-Holocene, mainly Holocene									VOL					WR [14959]	47.9	1.5		16.7				9.9	9.9	7.5	0.2		1	2.9	0.4
Andean Southern Volcanic Arc Zones.csv	[14959]	7(11) SVZ rear-arc	Laguna Blanca group	Laguna Blanca group	97	26	SC Chile rear-arc	ANDEAN ARC / SOUTHERN ANDEAN VOLCANIC ZONE / ARGENTINA	LAS LAJAS AREA, NEUQUEN PROVINCE	-38.7977	-38.7977	-70.2153	-70.2153	SAE			s_AH-15 [14959]	BASALT [14959]	Pliocene-Holocene, mainly Holocene									VOL					WR [14959]	49.1	1.5		16				8.55	10	6.9	0.2		3	2.3	0.8
Andean Southern Volcanic Arc Zones.csv	[14959]	7(11) SVZ rear-arc	Laguna Blanca group	Laguna Blanca group	97	26	SC Chile rear-arc	ANDEAN ARC / SOUTHERN ANDEAN VOLCANIC ZONE / ARGENTINA	LAGUNA BLANCA NATIONAL PARK AREA, NEUQUEN PROVINCE	-39.0377	-39.0377	-70.2471	-70.2471	SAE			s_AH-16 [14959]	BASALT [14959]	Pliocene-Holocene, mainly Holocene									VOL					WR [14959]	50.1	1.5		16.1				9.9	9.3	7.8	0.2		0.8	3.1	0.3
Andean Southern Volcanic Arc Zones.csv	[14959]	7(11) SVZ rear-arc	Laguna Blanca group	Laguna Blanca group	97	26	SC Chile rear-arc	ANDEAN ARC / SOUTHERN ANDEAN VOLCANIC ZONE / ARGENTINA	LAGUNA BLANCA NATIONAL PARK AREA, NEUQUEN PROVINCE	-39.0799	-39.0799	-70.3656	-70.3656	SAE			s_AH-17 [14959]	BASALT [14959]	Pliocene-Holocene, mainly Holocene									VOL					WR [14959]	50.9	1.6		16.7				8.1	8	7.1	0.1		2.3	3.5	0.7
Andean Southern Volcanic Arc Zones.csv	[14959]	7(11) SVZ rear-arc	Laguna Blanca group	Laguna Blanca group	97	26	SC Chile rear-arc	ANDEAN ARC / SOUTHERN ANDEAN VOLCANIC ZONE / ARGENTINA	LAGUNA BLANCA NATIONAL PARK AREA, NEUQUEN PROVINCE	-39.1007	-39.1007	-70.44	-70.44	SAE			s_AH-18 [14959]	BASALT [14959]	Pliocene-Holocene, mainly Holocene									VOL					WR [14959]	48.8	1.4		16.1				9.18	9.3	8.2	0.2		1.3	2.9	0.5
Andean Southern Volcanic Arc Zones.csv	[14959]	7(11) SVZ rear-arc	Laguna Blanca group	Laguna Blanca group	97	26	SC Chile rear-arc	ANDEAN ARC / SOUTHERN ANDEAN VOLCANIC ZONE / ARGENTINA	LAGUNA BLANCA NATIONAL PARK AREA, NEUQUEN PROVINCE	-39.1357	-39.1357	-70.4285	-70.4285	SAE			s_AH-19 [14959]	BASALT [14959]	Pliocene-Holocene, mainly Holocene									VOL					WR [14959]	49.7	1.6		16.7				10.17	8.8	7	0.1		0.9	3.1	0.3
Andean Southern Volcanic Arc Zones.csv	[14959]	7(11) SVZ rear-arc	Laguna Blanca group	Laguna Blanca group	97	26	SC Chile rear-arc	ANDEAN ARC / SOUTHERN ANDEAN VOLCANIC ZONE / ARGENTINA	LAGUNA BLANCA NATIONAL PARK AREA, NEUQUEN PROVINCE	-39.0215	-39.0215	-70.0179	-70.0179	SAE			s_AH-20 [14959]	BASALT [14959]	Pliocene-Holocene, mainly Holocene									VOL					WR [14959]	48.4	1.5		16.4				10.35	9.9	7.7	0.2		0.8	3.4	0.3
Andean Southern Volcanic Arc Zones.csv	[14959]	7(11) SVZ rear-arc	Laguna Blanca group	Laguna Blanca group	97	26	SC Chile rear-arc	ANDEAN ARC / SOUTHERN ANDEAN VOLCANIC ZONE / ARGENTINA	LAGUNA BLANCA NATIONAL PARK AREA, NEUQUEN PROVINCE	-39.078	-39.078	-70.0073	-70.0073	SAE			s_AH-21 [14959]	BASALT [14959]	Pliocene-Holocene, mainly Holocene									VOL					WR [14959]	49.4	1.8		15.6				10.35	8.7	7	0.2		0.9	3.6	0.3
Andean Southern Volcanic Arc Zones.csv	[18365]	7(11) SVZ rear-arc	Laguna Blanca group	Laguna Blanca group	97	26	SC Chile rear-arc	ANDEAN ARC / SOUTHERN ANDEAN VOLCANIC ZONE / ARGENTINA	BACKARC, AROUND LAGUNA BLANCA	-39.11	-39.11	-70.31	-70.31	SAE			s_CL 475B [18365]	BASALT [18365]	HOLOCENE [18365]				HOLOCENE [18365]					VOL			F		WR [18365]	50.69	1.59		17.33				9.45	8.08	6.47	0.15		1.62	3.93	0.47
Andean Southern Volcanic Arc Zones.csv	[9494]	7(11) SVZ rear-arc	Crater Basalt Volcanic Field	Crater Basalt Volcanic Field	98	26	SC Chile rear-arc	ANDEAN ARC / SOUTHERN ANDEAN VOLCANIC ZONE / ARGENTINA / CRATER BASALT VOLCANIC FIELD	CERRO VENTANA, PATAGONIA	-42.0544	-42.0544	-69.9989	-69.9989	SAE			s_GA 3 [9494]	BASALT, ALKALINE [9494]	QUATERNARY [9494]				QUATERNARY [9494]					VOL					WR [9494]	49.94	1.75		16.3				9.88	9.05	6.97	0.15		1.2	3.8	0.52
Andean Southern Volcanic Arc Zones.csv	[9494]	7(11) SVZ rear-arc	Crater Basalt Volcanic Field	Crater Basalt Volcanic Field	98	26	SC Chile rear-arc	ANDEAN ARC / SOUTHERN ANDEAN VOLCANIC ZONE / ARGENTINA / CRATER BASALT VOLCANIC FIELD	CERRO VENTANA, PATAGONIA	-42.0544	-42.0544	-69.9989	-69.9989	SAE			s_GA 3E [9494]	BASANITE [9494]	QUATERNARY [9494]				QUATERNARY [9494]					VOL					WR [9494]	47.66	2.22		15.97				10.12	7.37	7.5	0.15		2.55	4.56	0.71
Andean Southern Volcanic Arc Zones.csv	[9494]	7(11) SVZ rear-arc	Crater Basalt Volcanic Field	Crater Basalt Volcanic Field	98	26	SC Chile rear-arc	ANDEAN ARC / SOUTHERN ANDEAN VOLCANIC ZONE / ARGENTINA / CRATER BASALT VOLCANIC FIELD	CERRO GARCIA, PATAGONIA	-42.1867	-42.1867	-69.8644	-69.8644	SAE			s_GA 18A [9494]	HAWAIITE [9494]	QUATERNARY [9494]				QUATERNARY [9494]					VOL					WR [9494]	47.19	2.01		15.41				10.19	8.82	7.86	0.15		1.81	3.92	0.5
Andean Southern Volcanic Arc Zones.csv	[9494]	7(11) SVZ rear-arc	Crater Basalt Volcanic Field	Crater Basalt Volcanic Field	98	26	SC Chile rear-arc	ANDEAN ARC / SOUTHERN ANDEAN VOLCANIC ZONE / ARGENTINA / CRATER BASALT VOLCANIC FIELD	CERRO GARCIA, PATAGONIA	-42.2283	-42.2283	-69.8192	-69.8192	SAE			s_GA 23 [9494]	HAWAIITE [9494]	QUATERNARY [9494]				QUATERNARY [9494]					VOL					WR [9494]	48.5	1.95		15.99				10.41	8.94	7.6	0.15		1.59	3.9	0.43
Andean Southern Volcanic Arc Zones.csv	[9494]	7(11) SVZ rear-arc	Crater Basalt Volcanic Field	Crater Basalt Volcanic Field	98	26	SC Chile rear-arc	ANDEAN ARC / SOUTHERN ANDEAN VOLCANIC ZONE / ARGENTINA / CRATER BASALT VOLCANIC FIELD	CERRO FERMIN, PATAGONIA	-42.0525	-42.0525	-70.1569	-70.1569	SAE			s_GA 29 [9494]	TRACHYBASALT [9494]	QUATERNARY [9494]				QUATERNARY [9494]					VOL					WR [9494]	48.73	2.09		15.86				10.09	7.87	8.1	0.15		2.09	3.89	0.53
Andean Southern Volcanic Arc Zones.csv	[9494]	7(11) SVZ rear-arc	Crater Basalt Volcanic Field	Crater Basalt Volcanic Field	98	26	SC Chile rear-arc	ANDEAN ARC / SOUTHERN ANDEAN VOLCANIC ZONE / ARGENTINA / CRATER BASALT VOLCANIC FIELD	CERRO FERMIN, PATAGONIA	-42.0525	-42.0525	-70.1569	-70.1569	SAE			s_GA 29/R [9494]	TRACHYBASALT [9494]	QUATERNARY [9494]				QUATERNARY [9494]					VOL					WR [9494]	48.77	2.09		15.85				10.11	7.89	8.16	0.15		2.08	3.88	0.54
Andean Southern Volcanic Arc Zones.csv	[9494]	7(11) SVZ rear-arc	Crater Basalt Volcanic Field	Crater Basalt Volcanic Field	98	26	SC Chile rear-arc	ANDEAN ARC / SOUTHERN ANDEAN VOLCANIC ZONE / ARGENTINA / CRATER BASALT VOLCANIC FIELD	CERRO VOLCAN, PATAGONIA	-41.9086	-41.9086	-70.2356	-70.2356	SAE			s_GA 32 [9494]	HAWAIITE [9494]	QUATERNARY [9494]				QUATERNARY [9494]					VOL					WR [9494]	48.34	2.03		15.3				10.59	8.02	8.68	0.15		1.95	4.19	0.58
Andean Southern Volcanic Arc Zones.csv	[9494]	7(11) SVZ rear-arc	Crater Basalt Volcanic Field	Crater Basalt Volcanic Field	98	26	SC Chile rear-arc	ANDEAN ARC / SOUTHERN ANDEAN VOLCANIC ZONE / ARGENTINA / CRATER BASALT VOLCANIC FIELD	CERRO VOLCAN, PATAGONIA	-41.9108	-41.9108	-70.22	-70.22	SAE			s_GA 34 [9494]	HAWAIITE [9494]	QUATERNARY [9494]				QUATERNARY [9494]					VOL					WR [9494]	48.88	1.91		15.54				9.94	7.78	7.94	0.14		1.91	4.12	0.49
Andean Southern Volcanic Arc Zones.csv	[9494]	7(11) SVZ rear-arc	Crater Basalt Volcanic Field	Crater Basalt Volcanic Field	98	26	SC Chile rear-arc	ANDEAN ARC / SOUTHERN ANDEAN VOLCANIC ZONE / ARGENTINA / CRATER BASALT VOLCANIC FIELD	LOMA GAUCHA, PATAGONIA	-41.9081	-41.9081	-70.1236	-70.1236	SAE			s_GA 36 [9494]	BASANITE [9494]	QUATERNARY [9494]				QUATERNARY [9494]					VOL					WR [9494]	46.52	2.09		15.14				11.23	8.58	9.01	0.17		2.04	3.92	0.58
Andean Southern Volcanic Arc Zones.csv	[9494]	7(11) SVZ rear-arc	Crater Basalt Volcanic Field	Crater Basalt Volcanic Field	98	26	SC Chile rear-arc	ANDEAN ARC / SOUTHERN ANDEAN VOLCANIC ZONE / ARGENTINA / CRATER BASALT VOLCANIC FIELD	CERRO NEGRO, PATAGONIA	-42.1122	-42.1122	-70.2225	-70.2225	SAE			s_GA 40 [9494]	HAWAIITE [9494]	QUATERNARY [9494]				QUATERNARY [9494]					VOL					WR [9494]	48.66	1.9		15.76				10.02	8.23	8.73	0.16		1.62	3.75	0.45
Andean Southern Volcanic Arc Zones.csv	[9494]	7(11) SVZ rear-arc	Crater Basalt Volcanic Field	Crater Basalt Volcanic Field	98	26	SC Chile rear-arc	ANDEAN ARC / SOUTHERN ANDEAN VOLCANIC ZONE / ARGENTINA / CRATER BASALT VOLCANIC FIELD	CERRO FERMIN, PATAGONIA	-42.0094	-42.0094	-70.1853	-70.1853	SAE			s_GA 43 [9494]	HAWAIITE [9494]	QUATERNARY [9494]				QUATERNARY [9494]					VOL					WR [9494]	49.27	1.93		16.71				9.63	8.79	6.45	0.14		1.82	4.25	0.5
Andean Southern Volcanic Arc Zones.csv	[9494]	7(11) SVZ rear-arc	Crater Basalt Volcanic Field	Crater Basalt Volcanic Field	98	26	SC Chile rear-arc	ANDEAN ARC / SOUTHERN ANDEAN VOLCANIC ZONE / ARGENTINA / CRATER BASALT VOLCANIC FIELD	CERRO ANTITRUZ, PATAGONIA	-42.0581	-42.0581	-70.4319	-70.4319	SAE			s_GA 47 [9494]	BASANITE [9494]	QUATERNARY [9494]				QUATERNARY [9494]					VOL					WR [9494]	46.57	2.28		16.02				10.77	8.17	8.2	0.16		2.38	4.5	0.63
Andean Southern Volcanic Arc Zones.csv	[9494]	7(11) SVZ rear-arc	Crater Basalt Volcanic Field	Crater Basalt Volcanic Field	98	26	SC Chile rear-arc	ANDEAN ARC / SOUTHERN ANDEAN VOLCANIC ZONE / ARGENTINA / CRATER BASALT VOLCANIC FIELD	CERRO ANTITRUZ, PATAGONIA	-42.1867	-42.1867	-69.8644	-69.8644	SAE			s_GA 48L [9494]	BASANITE [9494]	QUATERNARY [9494]				QUATERNARY [9494]					VOL					WR [9494]	45.34	2.17		15.46				10.81	7.93	8.04	0.16		2.31	4.35	0.64
Andean Southern Volcanic Arc Zones.csv	[9494]	7(11) SVZ rear-arc	Crater Basalt Volcanic Field	Crater Basalt Volcanic Field	98	26	SC Chile rear-arc	ANDEAN ARC / SOUTHERN ANDEAN VOLCANIC ZONE / ARGENTINA / CRATER BASALT VOLCANIC FIELD	CERRO ANTITRUZ, PATAGONIA	-42.8633	-42.8633	-69.8633	-69.8633	SAE			s_GA 48B [9494]	BASANITE [9494]	QUATERNARY [9494]				QUATERNARY [9494]					VOL					WR [9494]	45.61	2.28		15.71				10.71	8.1	8.14	0.16		2.41	4.34	0.65
Andean Southern Volcanic Arc Zones.csv	[9494]	7(11) SVZ rear-arc	Crater Basalt Volcanic Field	Crater Basalt Volcanic Field	98	26	SC Chile rear-arc	ANDEAN ARC / SOUTHERN ANDEAN VOLCANIC ZONE / ARGENTINA / CRATER BASALT VOLCANIC FIELD	CERRO PINCHULEU FLOW, PATAGONIA	-42.2339	-42.2339	-69.8481	-69.8481	SAE			s_GA 49 [9494]	TRACHYBASALT [9494]	QUATERNARY [9494]				QUATERNARY [9494]					VOL					WR [9494]	47.78	1.54		15.41				9.99	9.07	7.83	0.15		2.01	3.45	0.42
Andean Southern Volcanic Arc Zones.csv	[9494]	7(11) SVZ rear-arc	Crater Basalt Volcanic Field	Crater Basalt Volcanic Field	98	26	SC Chile rear-arc	ANDEAN ARC / SOUTHERN ANDEAN VOLCANIC ZONE / ARGENTINA / CRATER BASALT VOLCANIC FIELD	CERRO PINCHULEU FLOW, PATAGONIA	-42.14	-42.14	-69.9311	-69.9311	SAE			s_GA 51 [9494]	BASANITE [9494]	QUATERNARY [9494]				QUATERNARY [9494]					VOL					WR [9494]	46.58	2.46		14.98				10.25	8.14	7.81	0.15		2.53	4.05	0.62
Andean Southern Volcanic Arc Zones.csv	[9494]	7(11) SVZ rear-arc	Crater Basalt Volcanic Field	Crater Basalt Volcanic Field	98	26	SC Chile rear-arc	ANDEAN ARC / SOUTHERN ANDEAN VOLCANIC ZONE / ARGENTINA / CRATER BASALT VOLCANIC FIELD	CERRO PINCHULEU, PATAGONIA	-42.1436	-42.1436	-69.9214	-69.9214	SAE			s_GA 53 [9494]	TRACHYBASALT [9494]	QUATERNARY [9494]				QUATERNARY [9494]					VOL					WR [9494]	47.03	1.87		14.97				10.48	8.75	8.36	0.15		2.15	3.42	0.51
Andean Southern Volcanic Arc Zones.csv	[9494]	7(11) SVZ rear-arc	Crater Basalt Volcanic Field	Crater Basalt Volcanic Field	98	26	SC Chile rear-arc	ANDEAN ARC / SOUTHERN ANDEAN VOLCANIC ZONE / ARGENTINA / CRATER BASALT VOLCANIC FIELD	CERRO NEGRO, PATAGONIA	-42.1294	-42.1294	-70.2231	-70.2231	SAE			s_GA 55 [9494]	TRACHYBASALT [9494]	QUATERNARY [9494]				QUATERNARY [9494]					VOL					WR [9494]	48.14	1.62		15.01				9.95	8.1	8.85	0.14		2.01	3.44	0.41
Andean Southern Volcanic Arc Zones.csv	[9494]	7(11) SVZ rear-arc	Crater Basalt Volcanic Field	Crater Basalt Volcanic Field	98	26	SC Chile rear-arc	ANDEAN ARC / SOUTHERN ANDEAN VOLCANIC ZONE / ARGENTINA / CRATER BASALT VOLCANIC FIELD	CERRO NEGRO, PATAGONIA	-42.1461	-42.1461	-70.2794	-70.2794	SAE			s_GA 56 [9494]	TRACHYBASALT [9494]	QUATERNARY [9494]				QUATERNARY [9494]					VOL					WR [9494]	47.68	1.96		16.63				9.51	8.89	6.32	0.14		2.22	3.95	0.51
Andean Southern Volcanic Arc Zones.csv	[9494]	7(11) SVZ rear-arc	Crater Basalt Volcanic Field	Crater Basalt Volcanic Field	98	26	SC Chile rear-arc	ANDEAN ARC / SOUTHERN ANDEAN VOLCANIC ZONE / ARGENTINA / CRATER BASALT VOLCANIC FIELD	CERRO NEGRO, PATAGONIA	-42.1497	-42.1497	-70.2664	-70.2664	SAE			s_GA 57 [9494]	TRACHYBASALT [9494]	QUATERNARY [9494]				QUATERNARY [9494]					VOL					WR [9494]	47.84	1.98		16.64				9.4	8.92	6.26	0.14		2.26	3.95	0.53
Andean Southern Volcanic Arc Zones.csv	[9494]	7(11) SVZ rear-arc	Crater Basalt Volcanic Field	Crater Basalt Volcanic Field	98	26	SC Chile rear-arc	ANDEAN ARC / SOUTHERN ANDEAN VOLCANIC ZONE / ARGENTINA / CRATER BASALT VOLCANIC FIELD	CERRO NEGRO, PATAGONIA	-42.105	-42.105	-70.2244	-70.2244	SAE			s_GA 58 [9494]	TRACHYBASALT [9494]	QUATERNARY [9494]				QUATERNARY [9494]					VOL					WR [9494]	47.55	1.74		15.55				9.74	8.91	7.8	0.14		2.04	3.59	0.42
Andean Southern Volcanic Arc Zones.csv	[18365]	7(11) SVZ rear-arc	Crater Basalt Volcanic Field	Crater Basalt Volcanic Field	98	26	SC Chile rear-arc	ANDEAN ARC / SOUTHERN ANDEAN VOLCANIC ZONE / ARGENTINA	BACKARC, PLATEAU BASALT, JACOBACCI VOLCANIC FIELD	-41.77	-41.77	-70.14	-70.14	SAE			s_CL 433 [18365]	BASALT [18365]	HOLOCENE [18365]				HOLOCENE [18365]					VOL			F		WR [18365]	47.86	1.55		16.04				11.33	9.37	8.78	0.16		1.12	3.3	0.29
Andean Southern Volcanic Arc Zones.csv	[18365]	7(11) SVZ rear-arc	Crater Basalt Volcanic Field	Crater Basalt Volcanic Field	98	26	SC Chile rear-arc	ANDEAN ARC / SOUTHERN ANDEAN VOLCANIC ZONE / ARGENTINA	MORE-ENRICHED BACKARC, JACOBACCI VOLCANIC FIELD	-41.04	-41.04	-70.22	-70.22	SAE			s_CL 431 [18365]	BASALT [18365]	HOLOCENE [18365]				HOLOCENE [18365]					VOL			F		WR [18365]	47.85	1.98		16.23				11.18	9.2	7.56	0.15		1.31	3.98	0.36
Andean Southern Volcanic Arc Zones.csv	[18365]	7(11) SVZ rear-arc	Crater Basalt Volcanic Field	Crater Basalt Volcanic Field	98	26	SC Chile rear-arc	ANDEAN ARC / SOUTHERN ANDEAN VOLCANIC ZONE / ARGENTINA	MORE-ENRICHED BACKARC, CRATER BASALT VOLCANIC FIELD	-42.14	-42.14	-70.05	-70.05	SAE			s_CL 434 [18365]	BASALT [18365]	HOLOCENE [18365]				HOLOCENE [18365]					VOL			F		WR [18365]	48.77	1.74		15.45				11.98	8.05	8.28	0.15		1.26	3.76	0.38
Andean Southern Volcanic Arc Zones.csv	[18365]	7(11) SVZ rear-arc	Crater Basalt Volcanic Field	Crater Basalt Volcanic Field	98	26	SC Chile rear-arc	ANDEAN ARC / SOUTHERN ANDEAN VOLCANIC ZONE / ARGENTINA	MORE-ENRICHED BACKARC, CRATER BASALT VOLCANIC FIELD	-42.07	-42.07	-70.21	-70.21	SAE			s_CL 437 [18365]	BASALT [18365]	HOLOCENE [18365]				HOLOCENE [18365]					VOL			F		WR [18365]	48.53	1.92		16.42				10.92	9.3	6.9	0.14		1.56	3.67	0.42
SCOTIA_ARC.csv	[2193]	12 South Sandwich	Zavodovski	Zavodovski	99	27	South Sandwich	SCOTIA ARC / SOUTH SANDWICH ISLAND ARC / ZAVODOVSKI		-56.33	-56.33	-27.53	-27.53	SAE			s_SHA(Z).5.5 [2193]	ANDESITE, BASALTIC [2193]										VOL					WR [2193]	52.62	0.87		15.55				11.08	10.37	8.22	0.22		0.15	1.47	0.05
SCOTIA_ARC.csv	[14922]	12 South Sandwich	Zavodovski	Zavodovski	99	27	South Sandwich	SCOTIA ARC / SOUTH SANDWICH ISLAND ARC / ZAVODOVSKI		-56.33	-56.33	-27.53	-27.53	SAE			s_SS.19.2 [14922]	NOT GIVEN [14922]	<3Ma									VOL					WR [14922]	50.81	0.5		17.93				8.55	13.06	7.17	0.17		0.1	1.65	0.05
SCOTIA_ARC.csv	[9837]	12 South Sandwich	Candlemas/Vindication	Candlemas/Vindication	100	27	South Sandwich	SCOTIA ARC / SOUTH SANDWICH ISLAND ARC / CANDLEMAS		-57.08	-57.08	-26.72	-26.72	SAE			s_SS87.19 [9837]	NOT GIVEN [9837]	not sure									VOL					WR [9837]	50.58	0.6		18.57				9.13	11.67	6.6	0.18		0.13	1.83	0.04
SCOTIA_ARC.csv	[10526]	12 South Sandwich	Candlemas/Vindication	Candlemas/Vindication	100	27	South Sandwich	SCOTIA ARC / SOUTH SANDWICH ISLAND ARC / CANDLEMAS		-57.08	-57.08	-26.72	-26.72	SAE			s_SS.86.1 [10526]	THOLEIITE [10526]	<3.1 Ma,but Nb-Ta problem									VOL					WR [10526]	51.14	0.49		19.05				8.71	11.62	6.33	0.17		0.12	1.76	0.05
SCOTIA_ARC.csv	[10526]	12 South Sandwich	Candlemas/Vindication	Candlemas/Vindication	100	27	South Sandwich	SCOTIA ARC / SOUTH SANDWICH ISLAND ARC / CANDLEMAS		-57.08	-57.08	-26.72	-26.72	SAE			s_SS.87.9 [10526]	THOLEIITE [10526]	<3.1 Ma,but Nb-Ta problem									VOL					WR [10526]	49.74	0.56		18.51				8.49	12.57	7.16	0.16		0.18	1.71	0.06
SCOTIA_ARC.csv	[10526]	12 South Sandwich	Candlemas/Vindication	Candlemas/Vindication	100	27	South Sandwich	SCOTIA ARC / SOUTH SANDWICH ISLAND ARC / CANDLEMAS		-57.08	-57.08	-26.72	-26.72	SAE			s_SS.87.18 [10526]	THOLEIITE [10526]	<3.1 Ma,but Nb-Ta problem									VOL					WR [10526]	50.15	0.59		18.13				8.74	12.25	6.83	0.17		0.21	1.67	0.06
SCOTIA_ARC.csv	[10526]	12 South Sandwich	Candlemas/Vindication	Candlemas/Vindication	100	27	South Sandwich	SCOTIA ARC / SOUTH SANDWICH ISLAND ARC / CANDLEMAS		-57.08	-57.08	-26.72	-26.72	SAE			s_SS.87.19 [10526]	THOLEIITE [10526]	<3.1 Ma,but Nb-Ta problem									VOL					WR [10526]	50.58	0.6		18.57				9.13	11.67	6.6	0.18		0.13	1.83	0.04
SCOTIA_ARC.csv	[2193]	12 South Sandwich	Candlemas/Vindication	Candlemas/Vindication	100	27	South Sandwich	SCOTIA ARC / SOUTH SANDWICH ISLAND ARC / CANDLEMAS		-57.08	-57.08	-26.72	-26.72	SAE			s_SSC.34.2 [2193]	BASALT [2193]									HIGHLY PORPHYRITIC [2193]	VOL					WR [2193]	50.34	0.66		18.81				9.24	11.7	6.27	0.19		0.12	1.68	0.03
SCOTIA_ARC.csv	[2193][14922]	12 South Sandwich	Candlemas/Vindication	Candlemas/Vindication	100	27	South Sandwich	SCOTIA ARC / SOUTH SANDWICH ISLAND ARC / CANDLEMAS		-57.08	-57.08	-26.72	-26.72	SAE			s_SSC.35.4 [2193]	BASALT [2193] / NOT GIVEN [14922]									HIGHLY PORPHYRITIC [2193]	VOL					WR [2193]	50.88	0.5		18.24				8.53	11.5	6.34	0.2		0.1	1.76	0.02
SCOTIA_ARC.csv	[10526]	12 South Sandwich	Candlemas/Vindication	Candlemas/Vindication	100	27	South Sandwich	SCOTIA ARC / SOUTH SANDWICH ISLAND ARC / VINDICATION		-57.11	-57.11	-26.81	-26.81	SAE			s_SS.12.1 [10526]	THOLEIITE [10526]	<3.1 Ma,but Nb-Ta problem									VOL					WR [10526]	49.84	0.51		17.94				8.7	13.1	6.54	0.18		0.14	1.82	0.04
SCOTIA_ARC.csv	[10526][14922]	12 South Sandwich	Candlemas/Vindication	Candlemas/Vindication	100	27	South Sandwich	SCOTIA ARC / SOUTH SANDWICH ISLAND ARC / VINDICATION		-57.11	-57.11	-26.81	-26.81	SAE			s_SS.12.7 [10526]	THOLEIITE [10526] / NOT GIVEN [14922]	not sure									VOL					WR [10526]	50.7	0.59		17.34				9.11	12.35	6.48	0.19		0.1	1.95	0.03
SCOTIA_ARC.csv	[2193][14922][2509][9837]	12 South Sandwich	Candlemas/Vindication	Candlemas/Vindication	100	27	South Sandwich	SCOTIA ARC / SOUTH SANDWICH ISLAND ARC / VINDICATION		-57.11	-57.11	-26.81	-26.81	SAE			s_SSV.2.1 [2193] / s_SSV2.1 [9837]	BASALT [2193] / NOT GIVEN [14922]									PORPHYRITIC [2193]	VOL					WR [2193]	49.74	0.51		19.64				8.19	12.37	6.77	0.16		0.09	1.28	0.02
SCOTIA_ARC.csv	[2193][2724][14922]	12 South Sandwich	Candlemas/Vindication	Candlemas/Vindication	100	27	South Sandwich	SCOTIA ARC / SOUTH SANDWICH ISLAND ARC / VINDICATION	QUADRANT PEAK	-57.1	-57.1	-26.77	-26.77	SAE			s_SSV.1.2 [2193]	BASALT [2193] / NOT GIVEN [14922]	<3Ma								PORPHYRITIC [2193]	VOL					WR [2193]	49.74	0.47		18.82				8.33	12.4	6.97	0.17		0.09	1.61	0.03
SCOTIA_ARC.csv	[2193][2724][9837]	12 South Sandwich	Candlemas/Vindication	Candlemas/Vindication	100	27	South Sandwich	SCOTIA ARC / SOUTH SANDWICH ISLAND ARC / VINDICATION	500 M SSW OF BRACES POINT	-57.1	-57.1	-26.77	-26.77	SAE			s_SSV.12.1 [2193]	BASALT [2193] / NOT GIVEN [9837]	<3Ma								PORPHYRITIC [2193]	VOL					WR [2193]	51.55	0.5		17.64				8.6	12.27	6.83	0.18		0.1	1.73	0.01
[truncated: 983 more rows]
[truncated: 154 more columns]

## Sheet: A2 Matrix
No.	Vol site	Frontal or RB	Section No.	Vol section	Count	lat	long	crust thickness/km	lat	long	slab age	lat	long	sequence No.	Convergence rate	estimate of arc-trench distance	slab dip θ (°) (Hayes2018)	Sinθ	tanθ	Φ/100	H/km (Hayes2018)	SIO2(WT%)	MGO(WT%)	Mg#	Eu*/Eu	V/Ti	Nb/Yb	Zr/Yb	La/Yb	Sm/Yb	Gd/Yb	Sr/Nd	Ba/La	Ba/Nb	U/Nb	K2O/TiO2	La/Nb	Sr/Y	Th/Nb	Nd isotope	Ce/Ce*	NO. of frontal-rear-/back-arc couple
[truncated: 241 more rows]

## Sheet: A3 Frontal arc section
arc section NO.	Arc section	crust thickness/km	std	Sum of Count	Convergence rate	std	slab dip(°) from Syracuse2006	std	H/km	std	Sin(dip)	std	Distance between trench (sequence point) and volcano	std	Φ/100	std	slab age	std	SIO2(WT%)	std	MGO(WT%)	std	Mg#	std	Nb/Yb	std	Zr/Yb	std	La/Yb	std	Sm/Yb	std	Gd/Yb	std	Sr/Y	std	Sr/Nd	std	Ba/La	std	Ba/Nb	std	U/Nb	std	Th/Nb	std	La/Nb	std	Eu*/Eu
[truncated: 34 more rows]
[truncated: 4 more columns]

[truncated: 4 more sheets: A4 RB arc section, A5 Slab window arc section, A6 Frontal-RB section couple, A7 Turner2015]
